# Supplementary material for: Change in demand for health-related undergraduate studies in Spain during 2015–2021: a temporal series study
Source: PeerJ journal article supplement (doi:10.7717/peerj.16353), 2023-11-08
Supplement: DatosyCifras2021_22.pdf [file DatosyCifras2021_22.pdf]

# Datos y cifras

del Sistema  
Universitario Español

Publicación 2021-2022

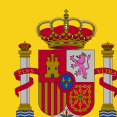

GOBIERNO  
DE ESPAÑA

MINISTERIO  
DE UNIVERSIDADES



## DATOS Y CIFRAS DEL SISTEMA UNIVERSITARIO ESPAÑOL. PUBLICACIÓN 2021-2022

MINISTERIO DE UNIVERSIDADES. 2022

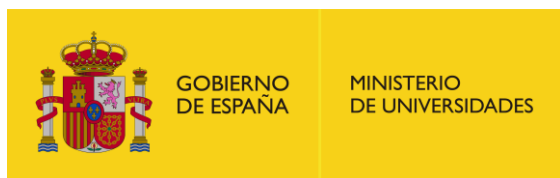

Publicación incluida en el Programa Editorial del Ministerio de Universidades.

Catálogo general de publicaciones oficiales.

<https://cpage.mpr.gob.es/>

La autoría de esta publicación corresponde a la Subdirección General de Actividad Universitaria Investigadora de la Secretaría General de Universidades.

Edita: Secretaría General Técnica del Ministerio de Universidades

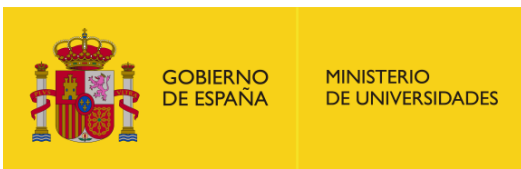

e-NIPO: 097-20-003-2

Imagen de portada: Imagen cedida por la Universidad de Córdoba.

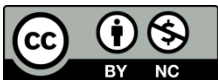

Esta licencia permite a otros entremezclar, ajustar y construir a partir de su obra con fines no comerciales, y aunque en sus nuevas creaciones deban reconocerle su autoría y no puedan ser utilizadas de manera comercial, no tienen que estar bajo una licencia con los mismos términos.

<https://creativecommons.org/licenses/by-nc/4.0/deed.es>



**DATOS Y CIFRAS DEL SISTEMA UNIVERSITARIO  
ESPAÑOL  
PUBLICACIÓN 2021-2022**

**Introducción** ..... 7  
**Infografía** ..... 8

**1. Oferta educativa universitaria** ..... 9

- 1.1. Universidades, campus y centros .... 10
- 1.2. Oferta de Grado ..... 13
- 1.3. Oferta de Máster ..... 15
- 1.4. Oferta de Doctorado ..... 17
- 1.5. Precios públicos de Grado ..... 18
- 1.6. Precios públicos de Máster ..... 19
- 1.7. Precios públicos de Doctorado ..... 20

**2. Pruebas de acceso a la universidad** ..... 21

- 2.1. Datos generales ..... 22
- 2.2. PAU genéricas ..... 23
- 2.3. Bachillerato y FP ..... 24

**3. Estudiantes en el Sistema Universitario Español** ..... 25

- 3.1. Tasa de escolarización y matriculados ..... 26
- 3.2. Perfil de los matriculados y egresados ..... 27

**4. Estudiantes de Grado** ..... 29

- 4.1. Movilidad interna ..... 30
- 4.2. Acceso a Univ. públicas presenciales ..... 33
- 4.3. Matriculados y egresados ..... 38
- 4.4. Perfil de los matriculados y egresados ..... 40

**5. Indicadores educativos de Grado** ..... 43

- 5.1. Principales indicadores ..... 44
- 5.2. Número de créditos ..... 47
- 5.3. Rendimiento ..... 49
- 5.4. Abandono y cambio de estudios ..... 52
- 5.5. Nota del expediente ..... 56
- 5.6. Idoneidad, graduación y duración media ..... 58

**6. Estudiantes de Máster y Doctorado** ..... 61

- 6.1. Transición de Grado a Máster ..... 62
- 6.2. Estudiantes matriculados de Máster ..... 63
- 6.3. Estudiantes egresados de Máster ..... 64
- 6.4. Estudiantes matriculados de Doctorado (RD 99/2011) ..... 65
- 6.5. Estudiantes egresados de Doctorado (RD 99/2011) ..... 66
- 6.6. Tesis doctorales leídas ..... 67
- 6.7. Perfil de los estudiantes de Máster y Doctorado ..... 68

**7. Indicadores educativos de Máster** ..... 69

- 7.1. Principales indicadores ..... 70
- 7.2. Número de créditos ..... 73
- 7.3. Rendimiento ..... 74
- 7.4. Abandono y cambio de estudio ..... 77
- 7.5. Nota del expediente ..... 81
- 7.6. Tasas de idoneidad y graduación y duración media ..... 83

**8. Internacionalización** ..... 85

- 8.1. Estudiantes extranjeros ..... 86
- 8.2. Estudiantes internacionales entrantes ..... 90
- 8.3. Estudiantes internacionales salientes ..... 92

**9. Becas y ayudas al estudio** ..... 95

- 9.1. Becas y ayudas al estudio de la AGE ..... 96
- 9.2. Indicadores propios de la convocatoria general de la AGE y del País Vasco ..... 98
- 9.3. Comparativa de indicadores entre becarios y no becarios ..... 101
- 9.4. Becas y ayudas de las comunidades autónomas y las universidades ..... 105

**10. Personal en SUE** ..... 107

- 10.1. Cifras clave ..... 108
- 10.2. Personal docente investigador ..... 110
- 10.3. Perfil del PDI ..... 111
- 10.4. PDI por rama ..... 112
- 10.5. PDI por ámbito ..... 113
- 10.6. PDI doctor ..... 114
- 10.7. Número de estudiantes por PDI ..... 115
- 10.8. PDI extranjero ..... 116
- 10.9. Sexenios del PDI ..... 117
- 10.10. Personal de administración y servicios ..... 118
- 10.11. Perfil del PAS ..... 119
- 10.12. PAS por servicios que presta ..... 120
- 10.13. PAS por número de estudiantes y de PDI ..... 121
- 10.14. Personal de investigación ..... 122
- 10.15. Perfil del PI ..... 123
- 10.16. PI extranjero ..... 124
- 10.17. Personal en I+D ..... 125

**ANEXO I: Definiciones** ..... 127



## Introducción

El informe Datos y Cifras del Sistema Universitario Español es una publicación de síntesis que presenta los datos más relevantes del ámbito universitario en España, centrándose en su estructura (organizativa y económica), el acceso, sus estudiantes y el personal. La publicación no se refiere a un curso concreto sino que intenta ofrecer los datos más actualizados posibles y con las desagregaciones más relevantes en las distintas áreas a la hora de su elaboración. La gran mayoría de estos datos están disponibles in extenso y con múltiples desagregaciones en las diversas publicaciones de las estadísticas universitarias, las cuales están referenciadas en la introducción de cada capítulo. Se recomienda al lector que revise las correspondientes estadísticas para obtener el dato más actualizado en cada momento.

En el primer capítulo se ofrece información sobre la oferta y estructura de la universidad dando una idea general de cómo se organizan las universidades y la oferta educativa que generan en el territorio español así como los precios públicos de las titulaciones establecidos en las distintas comunidades autónomas. El segundo capítulo de la publicación está reservado a las Pruebas de Acceso a la Universidad (PAU) ya que estas son el mayor puente de la población hacia el mundo universitario.

La siguiente parte de la publicación está dedicada a los estudiantes y su evolución académica. Estos capítulos (del capítulo 3 al 7) dan una información detallada de cuántos estudiantes están matriculados, cómo acceden y en qué condiciones, en concreto se ha realizado un esfuerzo por ofrecer datos de movilidad dentro del territorio nacional, posteriormente, se analiza cuál ha sido el recorrido académico de estos estudiantes en Grado y Máster. Se pueden consultar también los datos más relevantes de los alumnos de Doctorado y las Tesis doctorales leídas.

La preocupación actual por la internacionalización de la educación implica un capítulo dedicado exclusivamente a la movilidad de los estudiantes en el ámbito internacional, por un lado con datos referidos a estudiantes extranjeros y/o residentes fuera de España y por otro con datos sobre estudiantes en programas de movilidad (como por ejemplo el programa Erasmus+) tanto salientes como entrantes.

Las becas y ayudas al estudio suponen un gran esfuerzo presupuestario y entre otros objetivos tienen el de impedir que los obstáculos de naturaleza socioeconómica dificulten el acceso a la educación superior. En este capítulo se pueden consultar datos sobre el número de becarios y los importes recibidos así como el contraste de los indicadores académicos más relevantes entre la población becaria y la no becaria (entendiendo por becario aquel que ha recibido una beca de carácter general de la AGE o del País Vasco).

En el capítulo 10 se puede consultar información referente al personal de las universidades con sus correspondientes indicadores, diferenciando entre Personal de Administración y Servicios (PAS) y el Personal Docente Investigador (PDI) y el Personal Investigador (PI).

Finalmente se ha incluido un anexo en el que se incluyen las definiciones más relevantes de cada capítulo y un enlace a las metodologías de cada estadística relacionada con el capítulo. Se recomienda al lector que revise estas definiciones así como las notas aclaratorias que aparecen en las introducciones de cada capítulo antes o durante la consulta de cualquier dato de esta publicación.

## TITULACIONES IMPARTIDAS 2020-2021

GRADO

3.062

MÁSTER

3.613

DOCTORADO

1.173

## ESTUDIANTES MATRICULADOS 2020-2021

GRADO

GRADO

1.340.632

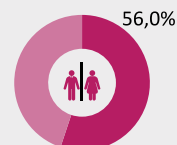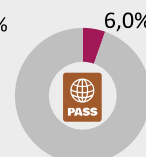

MÁSTER

248.460

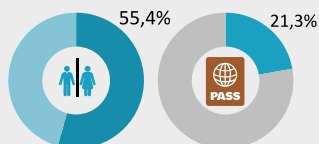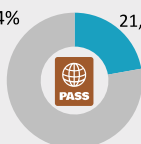

DOCTORADO

90.426

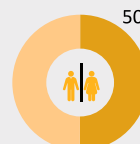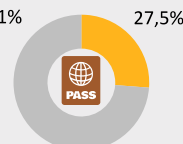

## ESTUDIANTES EGRESADOS 2019-2020

GRADO

GRADO

208.302

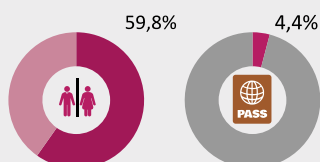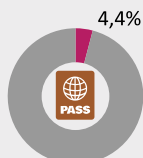

MÁSTER

131.267

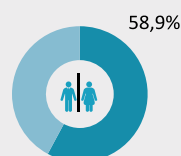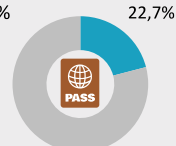

DOCTORADO

9.353

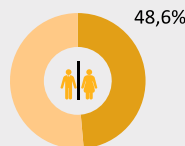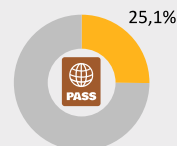

## ESTUDIANTES INTERNACIONALES

MATRÍCULA ORDINARIA

73.782

PROGRAMAS DE MOVILIDAD

55.793

## PERSONAL UNIVERSITARIO 2019-2020

PDI

127.383

PAS

64.848

PI

26.468

# 1 Oferta educativa universitaria

## UNIVERSIDADES Y CENTROS

El Sistema Universitario Español (SUE) en el curso 2020-2021 lo componen 84 universidades con actividad, 50 públicas y 34 privadas.

La universidad presencial en España tiene centros universitarios y otras unidades en un total de 168 municipios. La universidad pública presencial llega a 145 municipios la privada a 49.

Hay 1.067 centros universitarios entre escuelas y facultades, 544 institutos universitarios de investigación, 52 escuelas de doctorado, 56 hospitales universitarios y 77 fundaciones.

**Las universidades públicas imparten el 73,3% de las titulaciones de Grado y el 91% de las titulaciones de Doctorado.**

## OFERTA DE ESTUDIOS UNIVERSITARIOS

En el curso 2020-2021 se impartieron 3.062 titulaciones de Grado, el 73,3% en universidades públicas. Continúa la evolución ascendente desde el curso 2012-2013.

La rama de Ciencias Sociales y Jurídicas es la que contó con un mayor número de titulaciones de Grado (1.093) mientras que la rama de Ciencias es la que cuenta con el menor número de grados impartidos (258).

El porcentaje de grados impartidos en universidades públicas varía sensiblemente por rama, del 91% en Ciencias a poco más del 60% en Ciencias Sociales y Jurídicas y Ciencias de la Salud.

Las titulaciones de Máster en el curso 2020-2021 fueron 3.613, el 75,9% en universidades públicas. En los últimos cursos se ha estabilizado su número.

La distribución por rama y por tipo de universidad de las titulaciones de Doctorado varía notablemente con respecto a las titulaciones de Grado y Máster. Se impartieron un total de 1.173 titulaciones de Doctorado, 304 pertenecientes a la rama de Ciencias Sociales y Jurídicas, 273 a la de Ingeniería y Arquitectura y 236 a la de Ciencias. Las universidades privadas ofrecieron un total de 113 titulaciones y contaron únicamente con un 5,8% de los estudiantes de doctorado.

## PRECIOS PÚBLICOS

El precio público medio para la primera matrícula de Grado en el curso 2021-2022 descendió un 0,6% con respecto al curso anterior. Por comunidades autónomas, el precio medio del crédito en titulaciones de Grado osciló entre los 11,9 euros Galicia y los 23,4 en Madrid.

En lo que respecta a los precios públicos por crédito de las titulaciones de Máster para el curso 2021-2022, hay que diferenciar entre titulaciones habilitantes, donde el precio medio por crédito se situó en 21,2 euros y titulaciones no habilitantes con un precio medio por crédito de 31,3 euros.

El precio medio de la tutela académica para elaborar la tesis doctoral se estableció en 254,4 euros, con un descenso de 4,2 euros respecto al curso anterior.

### **Nota**

(1) La Estadística de Universidades Centros y Titulaciones se basa en la información de los ficheros auxiliares del SIIU en conjunto con información obtenida del Registro de Universidades Centros y Titulaciones. Esta información puede sufrir actualizaciones y no coincidir con publicaciones posteriores a la fecha de elaboración de esta publicación.

(2) El precio medio de las titulaciones impartidas es una media aritmética del precio de cada una de las titulaciones impartidas por universidades públicas en centros propios y otras unidades universitarias de naturaleza pública. La metodología de este indicador ha sufrido cambios, para más información consulte la correspondiente metodología.

### **Referencias**

[ANEXO I: Definiciones](#)

[Estadística de Universidades, Centros y Titulaciones](#)

[Estadística de Estudiantes Universitarios](#)

[Estadísticas de Precios Públicos](#)

[Sistema Integrado de Información Universitaria](#)



# 1.1 Oferta educativa universitaria. Organización y expansión de la universidad

Mapa 1.1.1 Distribución geográfica de las universidades españolas con actividad en el curso 2020-2021.

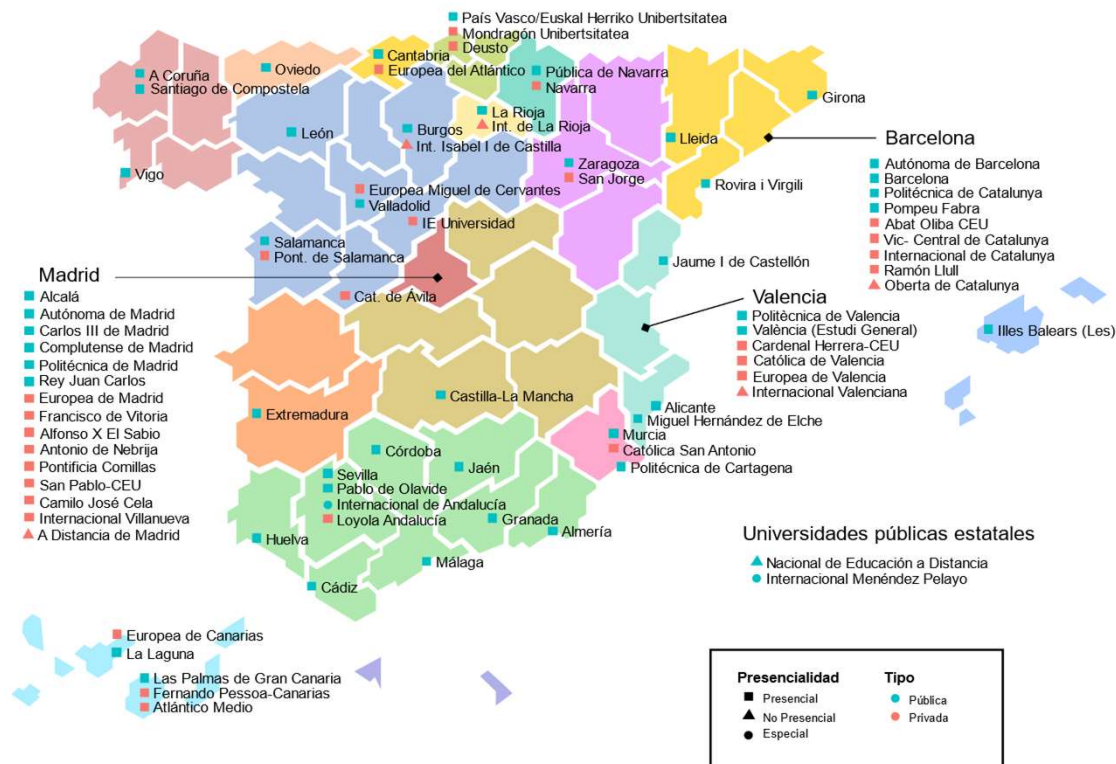

Tabla 1.1.2 Distribución del número de universidades españolas con actividad en el curso 2020-2021 por comunidad autónoma, tipo y modalidad de la universidad.

|                              | Total     |           |          |          | Universidades públicas |           |          |          | Universidades privadas |           |          |          |
|------------------------------|-----------|-----------|----------|----------|------------------------|-----------|----------|----------|------------------------|-----------|----------|----------|
|                              | TOTAL     | P         | NP       | E        | TOTAL                  | P         | NP       | E        | TOTAL                  | P         | NP       | E        |
| <b>Total</b>                 | <b>84</b> | <b>76</b> | <b>6</b> | <b>2</b> | <b>50</b>              | <b>47</b> | <b>1</b> | <b>2</b> | <b>34</b>              | <b>29</b> | <b>5</b> | <b>.</b> |
| Andalucía                    | 11        | 10        | .        | 1        | 10                     | 9         | .        | 1        | 1                      | 1         | .        | .        |
| Aragón                       | 2         | 2         | .        | .        | 1                      | 1         | .        | .        | 1                      | 1         | .        | .        |
| Asturias (Principado de)     | 1         | 1         | .        | .        | 1                      | 1         | .        | .        | .                      | .         | .        | .        |
| Balears (Illes)              | 1         | 1         | .        | .        | 1                      | 1         | .        | .        | .                      | .         | .        | .        |
| Canarias                     | 5         | 5         | .        | .        | 2                      | 2         | .        | .        | 3                      | 3         | .        | .        |
| Cantabria                    | 2         | 2         | .        | .        | 1                      | 1         | .        | .        | 1                      | 1         | .        | .        |
| Castilla - La Mancha         | 1         | 1         | .        | .        | 1                      | 1         | .        | .        | .                      | .         | .        | .        |
| Castilla y León              | 9         | 8         | 1        | .        | 4                      | 4         | .        | .        | 5                      | 4         | 1        | .        |
| Cataluña                     | 12        | 11        | 1        | .        | 7                      | 7         | .        | .        | 5                      | 4         | 1        | .        |
| Comunitat Valenciana         | 9         | 8         | 1        | .        | 5                      | 5         | .        | .        | 4                      | 3         | 1        | .        |
| Estado                       | 2         | .         | 1        | 1        | 2                      | .         | 1        | 1        | .                      | .         | .        | .        |
| Extremadura                  | 1         | 1         | .        | .        | 1                      | 1         | .        | .        | .                      | .         | .        | .        |
| Galicia                      | 3         | 3         | .        | .        | 3                      | 3         | .        | .        | .                      | .         | .        | .        |
| Madrid (Comunidad de)        | 15        | 14        | 1        | .        | 6                      | 6         | .        | .        | 9                      | 8         | 1        | .        |
| Murcia (Región de)           | 3         | 3         | .        | .        | 2                      | 2         | .        | .        | 1                      | 1         | .        | .        |
| Navarra (Comunidad Foral de) | 2         | 2         | .        | .        | 1                      | 1         | .        | .        | 1                      | 1         | .        | .        |
| País Vasco                   | 3         | 3         | .        | .        | 1                      | 1         | .        | .        | 2                      | 2         | .        | .        |
| Rioja (La)                   | 2         | 1         | 1        | .        | 1                      | 1         | .        | .        | 1                      | .         | 1        | .        |

P = Presencial; NP = No presencial; E = Especial

## 1.1 Oferta educativa universitaria. Organización y expansión de la universidad

Tabla 1.1.3 Número de municipios con unidades universitarias por universidad y comunidad autónoma (universidades presenciales). Curso 2020-2021.

| Total: 168                                |            |                                            |           |
|-------------------------------------------|------------|--------------------------------------------|-----------|
| <b>Andalucía</b>                          | <b>24</b>  | <b>Comunitat Valenciana</b>                | <b>22</b> |
| P Almería                                 | 1          | P Alicante                                 | 5         |
| P Cádiz                                   | 5          | P Cardenal Herrera-CEU                     | 4         |
| P Córdoba                                 | 2          | P Católica de Valencia San Vicente Mártir  | 6         |
| P Granada                                 | 4          | P Europea de Valencia                      | 1         |
| P Huelva                                  | 1          | P Jaume I de Castellón                     | 1         |
| P Jaén                                    | 3          | P Miguel Hernández de Elche                | 5         |
| P Loyola Andalucía                        | 2          | P Politécnica de València                  | 4         |
| P Málaga                                  | 4          | P València (Estudi General)                | 7         |
| P Pablo de Olavide                        | 1          | <b>Extremadura</b>                         | <b>5</b>  |
| P Sevilla                                 | 3          | P Extremadura                              | 5         |
| <b>Aragón</b>                             | <b>6</b>   | <b>Galicia</b>                             | <b>11</b> |
| P San Jorge                               | 3          | P A Coruña                                 | 3         |
| P Zaragoza                                | 4          | P Santiago de Compostela                   | 6         |
| <b>Asturias (Principado de)</b>           | <b>4</b>   | P Vigo                                     | 5         |
| P Oviedo                                  | 4          | <b>Madrid (Comunidad de)</b>               | <b>22</b> |
| <b>Balears (Illes)</b>                    | <b>3</b>   | P Alcalá                                   | 3         |
| P Illes Balears (Les)                     | 3          | P Alfonso X El Sabio                       | 1         |
| <b>Canarias</b>                           | <b>9</b>   | P Antonio de Nebrija                       | 2         |
| P Atlántico Medio                         | 1          | P Autónoma de Madrid                       | 1         |
| P Europea de Canarias                     | 1          | P Camilo José Cela                         | 4         |
| P Fernando Pessoa-Canarias (UFP-C)        | 1          | P Carlos III de Madrid                     | 5         |
| P La Laguna                               | 3          | P Complutense de Madrid                    | 4         |
| P Las Palmas de Gran Canaria              | 4          | P Europea de Madrid                        | 4         |
| <b>Cantabria</b>                          | <b>4</b>   | P Francisco de Vitoria                     | 1         |
| P Cantabria                               | 4          | P Internacional Villanueva                 | 1         |
| P Europea del Atlántico                   | 1          | P Politécnica de Madrid                    | 3         |
| <b>Castilla - La Mancha</b>               | <b>6</b>   | P Pontificia Comillas                      | 5         |
| P Castilla - La Mancha                    | 6          | P Rey Juan Carlos                          | 6         |
| <b>Castilla y León</b>                    | <b>14</b>  | P San Pablo-CEU                            | 2         |
| P Burgos                                  | 1          | <b>Murcia (Región de)</b>                  | <b>4</b>  |
| P Católica Santa Teresa de Jesús de Ávila | 2          | P Católica San Antonio                     | 1         |
| P Europea Miguel de Cervantes             | 1          | P Murcia                                   | 4         |
| P IE Universidad                          | 2          | P Politécnica de Cartagena                 | 3         |
| P León                                    | 3          | <b>Navarra (Comunidad Foral de)</b>        | <b>5</b>  |
| P Pontificia de Salamanca                 | 2          | P Navarra                                  | 4         |
| P Salamanca                               | 5          | P Pública de Navarra                       | 2         |
| P Valladolid                              | 4          | <b>País Vasco</b>                          | <b>15</b> |
| <b>Cataluña</b>                           | <b>22</b>  | P Deusto                                   | 3         |
| P Abat Oliba CEU                          | 1          | P Mondragón Unibertsitatea                 | 9         |
| P Autónoma de Barcelona                   | 6          | P País Vasco/Euskal Herriko Unibertsitatea | 8         |
| P Barcelona                               | 3          | <b>Rioja (La)</b>                          | <b>1</b>  |
| P Girona                                  | 5          | P La Rioja                                 | 1         |
| P Internacional de Catalunya              | 2          |                                            |           |
| P Lleida                                  | 3          |                                            |           |
| P Politécnica de Catalunya                | 7          |                                            |           |
| P Pompeu Fabra                            | 2          |                                            |           |
| P Ramón Llull                             | 1          |                                            |           |
| P Rovira i Virgili                        | 5          |                                            |           |
| P Vic-Central de Catalunya                | 3          |                                            |           |
| <b>P Pública presencial</b>               | <b>145</b> | <b>P Privada presencial</b>                | <b>49</b> |

# 1.1 Oferta educativa universitaria. Organización y expansión de la universidad

**Gráfico 1.1.4** Distribución del número de centros universitarios por comunidad autónoma y tipo de centro. Curso 2020-2021.

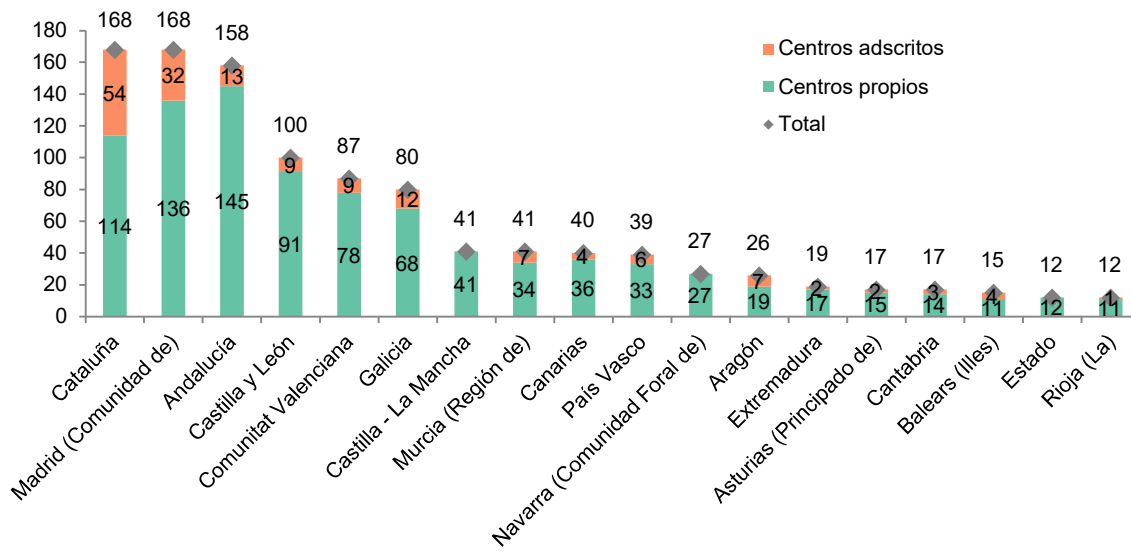

**Gráfico 1.1.5** Distribución del número de centros universitarios por tipo de universidad, tipo de centro y naturaleza del mismo. Curso 2020-2021.

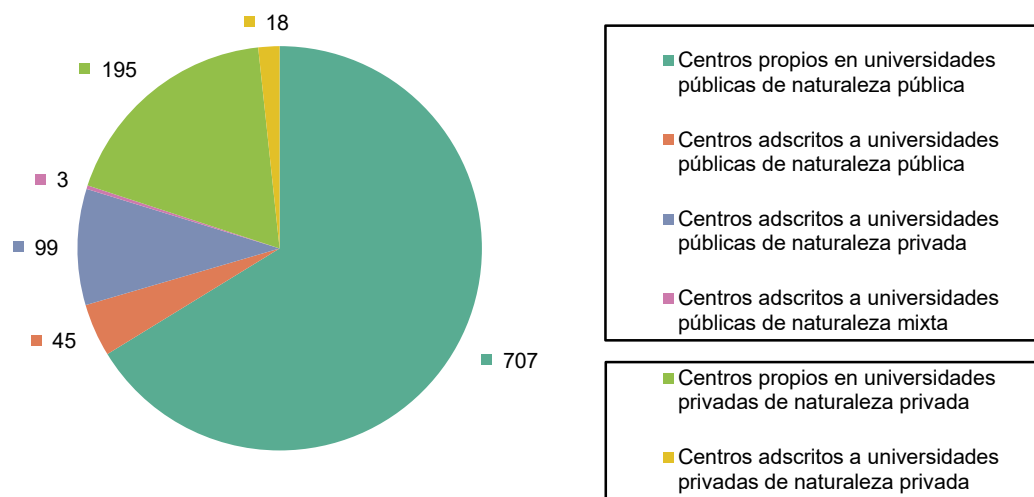

**Gráfico 1.1.6** Número de otras unidades universitarias por tipo de unidad y por su naturaleza. Curso 2020-2021.

■ Instituto univ. de investigación (544) ■ Escuela de doctorado (52) ■ Hospital (56) ■ Fundación (77)

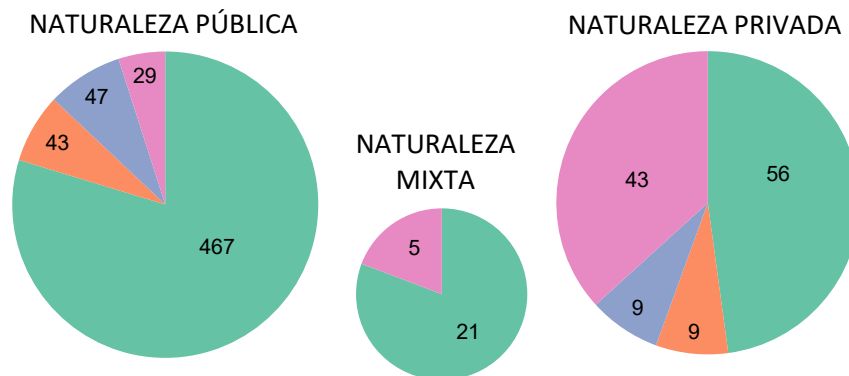

## 1.2 Oferta educativa universitaria. Grado

**Tabla 1.2.1** Número de titulaciones de Grado impartidas y estudiantes matriculados en Grado<sup>(1)</sup> por rama de enseñanza y tipo de universidad. Curso 2020-2021.

|                              | Total        |                  | Universidades públicas |                  |       | Universidades privadas |                |       |
|------------------------------|--------------|------------------|------------------------|------------------|-------|------------------------|----------------|-------|
|                              | Nº Grados    | Nº Estudiantes   | Nº Grados              | Nº Estudiantes   |       | Nº Grados              | Nº Estudiantes |       |
|                              |              |                  |                        | Total            | %     |                        | Total          | %     |
| <b>Total</b>                 | <b>3.062</b> | <b>1.340.632</b> | <b>2.245</b>           | <b>1.110.491</b> | 82,8% | <b>818</b>             | <b>230.141</b> | 17,2% |
| <b>Rama de enseñanza</b>     |              |                  |                        |                  |       |                        |                |       |
| Ciencias Sociales y Jurídica | 1.093        | 621.235          | 704                    | 500.370          | 80,5% | 389                    | 120.865        | 19,5% |
| Ingeniería y Arquitectura    | 830          | 233.365          | 668                    | 210.379          | 90,2% | 162                    | 22.986         | 9,8%  |
| Artes y Humanidades          | 460          | 142.473          | 373                    | 128.329          | 90,1% | 88                     | 14.144         | 9,9%  |
| Ciencias de la Salud         | 421          | 257.905          | 264                    | 188.553          | 73,1% | 157                    | 69.352         | 26,9% |
| Ciencias                     | 258          | 85.654           | 236                    | 82.860           | 96,7% | 22                     | 2.794          | 3,3%  |

**Mapa 1.2.2** Distribución geográfica de los Grados impartidos. Curso 2020-2021.

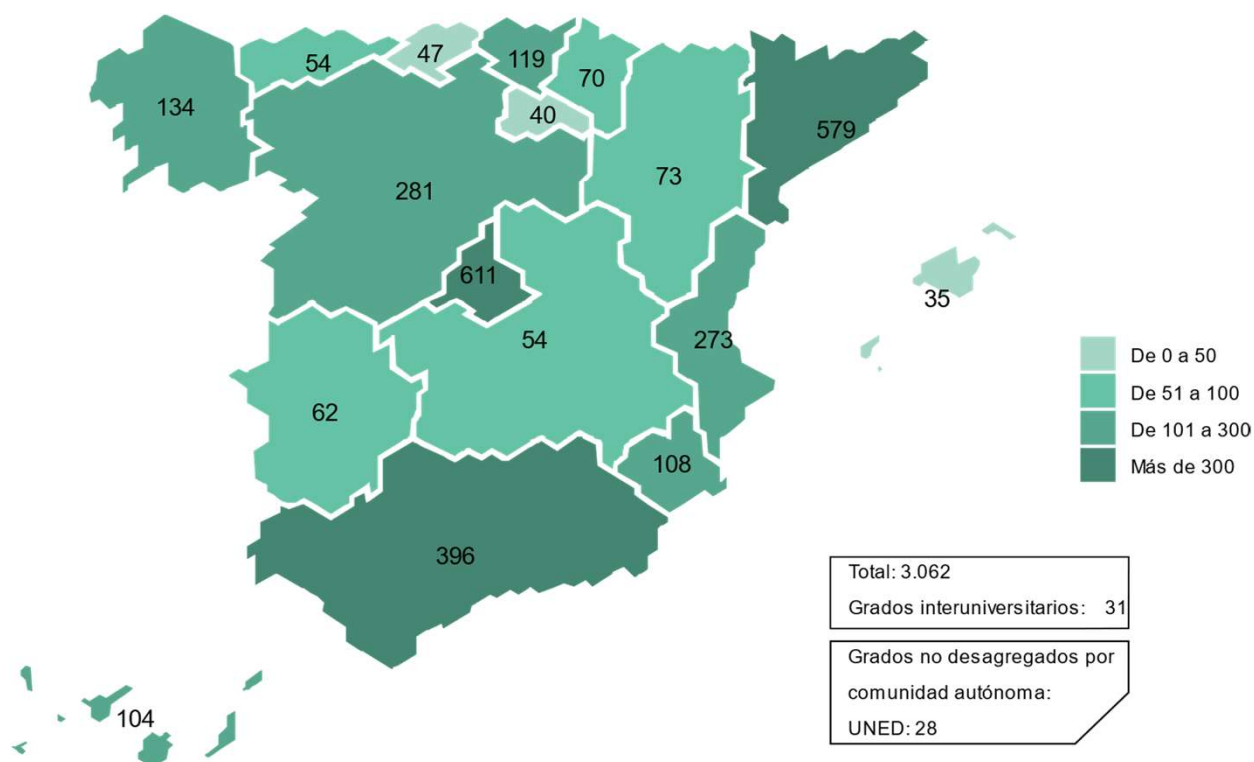

**Gráfico 1.2.3** Evolución del número de titulaciones de Grado impartidas por rama de enseñanza.

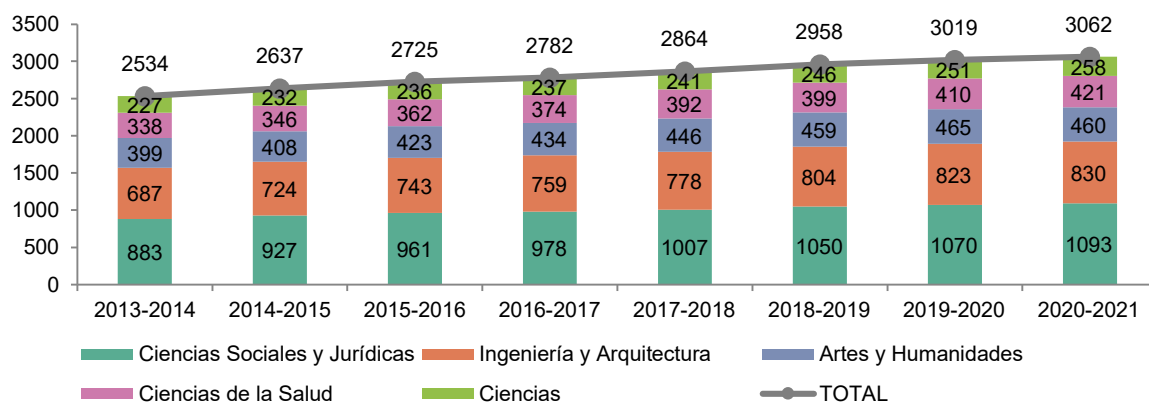

(1) Datos provisionales

## 1.2 Oferta educativa universitaria. Grado

**Tabla 1.2.4** Número de titulaciones de Grado impartidas por rama de enseñanza, tipo de universidad y número de créditos de su plan de estudios. Curso 2020-2021.

|                               | Universidades públicas                      |           |           | Universidades privadas                      |           |           |
|-------------------------------|---------------------------------------------|-----------|-----------|---------------------------------------------|-----------|-----------|
|                               | Número de créditos de los planes de estudio |           |           | Número de créditos de los planes de estudio |           |           |
|                               | [240,300)                                   | [300,360) | 360 o más | [240,300)                                   | [300,360) | 360 o más |
| <b>Total</b>                  | <b>2.135</b>                                | <b>64</b> | <b>32</b> | <b>749</b>                                  | <b>43</b> | <b>12</b> |
| <b>Rama de enseñanza</b>      |                                             |           |           |                                             |           |           |
| Ciencias Sociales y Jurídicas | 701                                         | .         | .         | 383                                         | .         | .         |
| Ingeniería y Arquitectura     | 636                                         | 27        | .         | 138                                         | 20        | .         |
| Artes y Humanidades           | 369                                         | .         | .         | 85                                          | .         | .         |
| Ciencias de la Salud          | 193                                         | 37        | 32        | 121                                         | 23        | 12        |
| Ciencias                      | 236                                         | .         | .         | 22                                          | .         | .         |

**Tabla 1.2.5** Número de plazas ofertadas en titulaciones de Grado en universidades públicas presenciales por comunidad autónoma y rama de enseñanza. Curso 2020-2021<sup>(1)</sup>

|                          | C. Sociales y Jurídicas | Ingeniería y Arquitectura | Artes y Humanidades | C. de la Salud | Ciencias      | Total          |  |
|--------------------------|-------------------------|---------------------------|---------------------|----------------|---------------|----------------|--|
| <b>Total</b>             | <b>111.297</b>          | <b>53.331</b>             | <b>27.778</b>       | <b>34.862</b>  | <b>17.525</b> | <b>244.793</b> |  |
| Andalucía                | 24.620                  | 9.159                     | 6.068               | 6.856          | 4.009         | <b>50.712</b>  |  |
| Madrid (Comunidad de)    | 20.790                  | 10.496                    | 4.647               | 5.387          | 2.844         | <b>44.164</b>  |  |
| Cataluña                 | 14.989                  | 8.405                     | 5.255               | 6.534          | 2.725         | <b>37.908</b>  |  |
| Comunitat Valenciana     | 11.523                  | 5.988                     | 2.690               | 3.654          | 1.648         | <b>25.503</b>  |  |
| Castilla y León          | 6.845                   | 3.762                     | 2.238               | 2.070          | 1.130         | <b>16.045</b>  |  |
| Galicia                  | 4.897                   | 2.438                     | 1.255               | 1.834          | 1.000         | <b>11.424</b>  |  |
| Canarias                 | 5.155                   | 2.255                     | 1.095               | 1.402          | 482           | <b>10.389</b>  |  |
| País Vasco               | 3.540                   | 2.285                     | 845                 | 1.230          | 628           | <b>8.528</b>   |  |
| Murcia (Región de)       | 4.005                   | 1.261                     | 945                 | 1.200          | 575           | <b>7.986</b>   |  |
| Aragón                   | 2.926                   | 1.379                     | 655                 | 945            | 612           | <b>6.517</b>   |  |
| Castilla - La Mancha     | 2.970                   | 1.305                     | 470                 | 1.137          | 330           | <b>6.212</b>   |  |
| Asturias (Principado de) | 2.163                   | 1.468                     | 645                 | 622            | 455           | <b>5.353</b>   |  |
| Extremadura              | 2.534                   | 1.105                     | 345                 | 740            | 535           | <b>5.259</b>   |  |
| Balears (Illes)          | 1.910                   | 425                       | 370                 | 461            | 254           | <b>3.420</b>   |  |
| Cantabria                | 970                     | 710                       | 130                 | 435            | 108           | <b>2.353</b>   |  |
| Navarra (C. Foral de)    | 935                     | 665                       | 50                  | 280            | 90            | <b>2.020</b>   |  |
| Rioja (La)               | 525                     | 225                       | 75                  | 75             | 100           | <b>1.000</b>   |  |

**Gráfico 1.2.6** Número de plazas ofertadas en titulaciones de Grado en universidades públicas presenciales por ámbito de estudio. Curso 2020-2021<sup>(1)</sup>

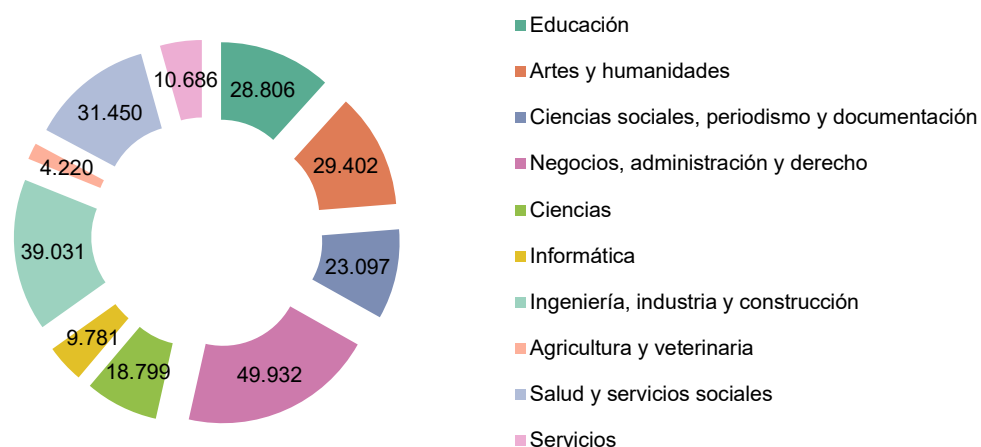

(1) En las titulaciones sin límite de plazas se ha computado la oferta en primer año que figura en la memoria de verificación del título.



## 1.3 Oferta educativa universitaria. Máster

**Tabla 1.3.1** Número de titulaciones de Máster impartidas y estudiantes matriculados(1) en Máster por rama de enseñanza y tipo de universidad. Curso 2020-2021.

|                               | Total        |                               | Universidades públicas |                               |              | Universidades privadas |                               |              |
|-------------------------------|--------------|-------------------------------|------------------------|-------------------------------|--------------|------------------------|-------------------------------|--------------|
|                               | Nº Másteres  | Nº Estudiantes <sup>(1)</sup> | Nº Másteres            | Nº Estudiantes <sup>(1)</sup> |              | Nº Másteres            | Nº Estudiantes <sup>(1)</sup> |              |
|                               |              |                               |                        | Total                         | %            |                        | Total                         | %            |
| <b>Total</b>                  | <b>3.613</b> | <b>248.460</b>                | <b>2.742</b>           | <b>138.268</b>                | <b>55,7%</b> | <b>875</b>             | <b>110.192</b>                | <b>44,3%</b> |
| <b>Rama de enseñanza</b>      |              |                               |                        |                               |              |                        |                               |              |
| Ciencias Sociales y Jurídicas | 1.520        | 144.686                       | 1.009                  | 64.665                        | 44,7%        | 513                    | 80.021                        | 55,3%        |
| Ingeniería y Arquitectura     | 806          | 47.186                        | 679                    | 35.188                        | 74,6%        | 128                    | 11.998                        | 25,4%        |
| Artes y Humanidades           | 423          | 19.066                        | 372                    | 14.294                        | 75,0%        | 51                     | 4.772                         | 25,0%        |
| Ciencias de la Salud          | 521          | 27.174                        | 352                    | 14.385                        | 52,9%        | 170                    | 12.789                        | 47,1%        |
| Ciencias                      | 343          | 10.348                        | 330                    | 9.736                         | 94,1%        | 13                     | 612                           | 5,9%         |

**Mapa 1.3.2** Distribución geográfica de las titulaciones de Máster impartidas. Curso 2020-2021.

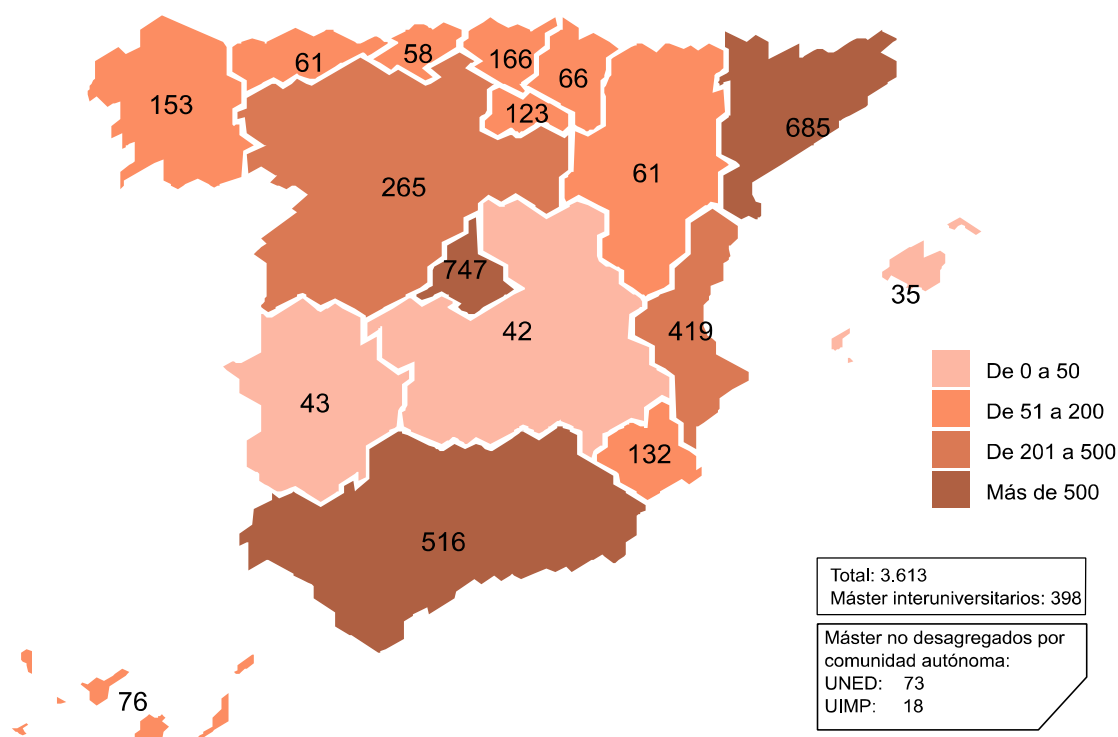

**Gráfica 1.3.3** Evolución del número de titulaciones de Máster impartidas por rama de enseñanza.

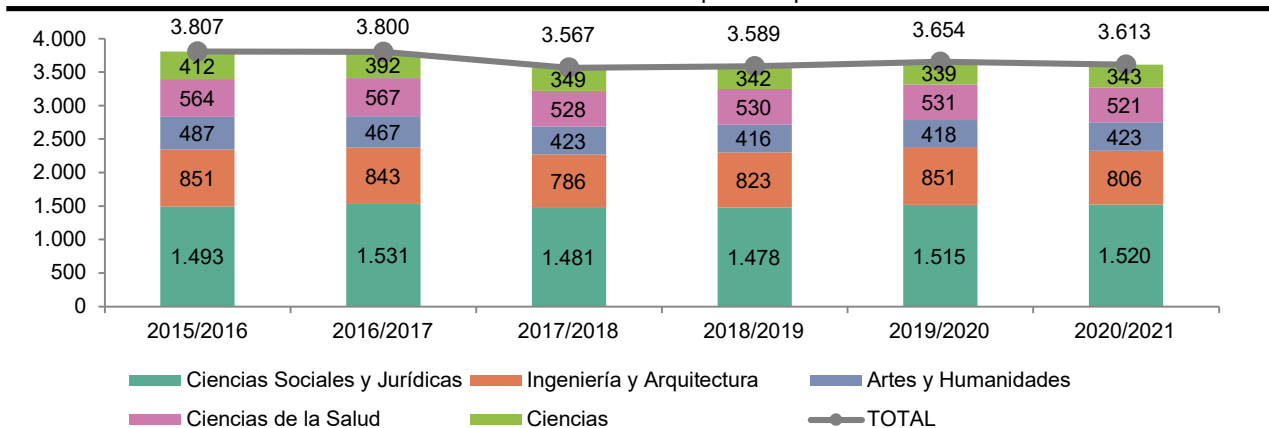

(1) Datos provisionales

### 1.3 Oferta educativa universitaria. Máster

**Gráfico 1.3.4** Número de titulaciones de Máster impartidas por rama de enseñanza, tipo de universidad y número de créditos de su plan de estudios. Curso 2020-2021.

|                               | Universidades públicas                      |            |            | Universidades privadas                      |            |           |
|-------------------------------|---------------------------------------------|------------|------------|---------------------------------------------|------------|-----------|
|                               | Número de créditos de los planes de estudio |            |            | Número de créditos de los planes de estudio |            |           |
|                               | [60,90)                                     | [90,120)   | 120 o más  | [60,90)                                     | [90,120)   | 120 o más |
| <b>Total</b>                  | <b>2.091</b>                                | <b>403</b> | <b>251</b> | <b>723</b>                                  | <b>118</b> | <b>34</b> |
| <b>Rama de enseñanza</b>      |                                             |            |            |                                             |            |           |
| Ciencias Sociales y Jurídicas | 832                                         | 122        | 57         | 455                                         | 51         | 7         |
| Ingeniería y Arquitectura     | 370                                         | 183        | 126        | 91                                          | 25         | 12        |
| Artes y Humanidades           | 337                                         | 21         | 14         | 50                                          | -          | 1         |
| Ciencias de la Salud          | 280                                         | 50         | 22         | 119                                         | 37         | 14        |
| Ciencias                      | 272                                         | 27         | 32         | 8                                           | 5          | -         |

**Gráfico 1.3.5** Número de titulaciones de Máster impartidas por ámbito de estudio. Curso 2020-2021.

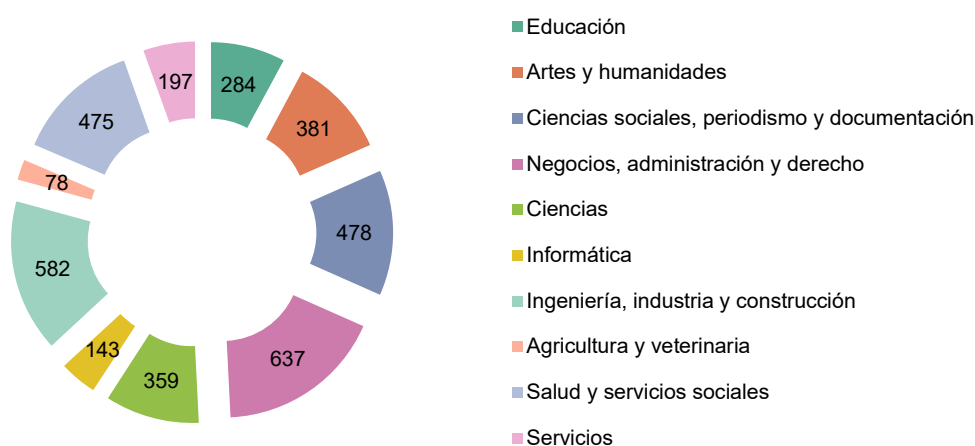

**Tabla 1.3.6** Número de plazas ofertadas en titulaciones de Máster en universidades públicas presenciales por comunidad autónoma y rama de enseñanza. Curso 2020-2021<sup>(1)</sup>.

|                       | C. Sociales y Jurídicas | Ingeniería y Arquitectura | Artes y Humanidades | C. de la Salud | Ciencias      | Total          |
|-----------------------|-------------------------|---------------------------|---------------------|----------------|---------------|----------------|
| <b>TOTAL</b>          | <b>55.018</b>           | <b>27.344</b>             | <b>12.802</b>       | <b>12.224</b>  | <b>10.380</b> | <b>117.768</b> |
| Madrid (C. de)        | 14.097                  | 6.867                     | 3.220               | 2.096          | 2.166         | 28.446         |
| Andalucía             | 10.296                  | 4.075                     | 2.421               | 2.324          | 1.931         | 21.047         |
| Cataluña              | 9.597                   | 4.400                     | 2.580               | 2.497          | 1.942         | 21.016         |
| Comunitat Valenciana  | 5.592                   | 3.690                     | 1.325               | 1.893          | 1.111         | 13.611         |
| Castilla y León       | 2.895                   | 1.587                     | 751                 | 745            | 610           | 6.588          |
| Galicia               | 2.484                   | 1.196                     | 435                 | 506            | 565           | 5.186          |
| País Vasco            | 1.443                   | 1.347                     | 376                 | 340            | 316           | 3.822          |
| Murcia (Región de)    | 1.805                   | 572                       | 305                 | 494            | 323           | 3.499          |
| Canarias              | 1.324                   | 613                       | 342                 | 187            | 167           | 2.633          |
| Aragón                | 1.109                   | 685                       | 192                 | 256            | 257           | 2.499          |
| Extremadura           | 1.171                   | 335                       | 130                 | 145            | 170           | 1.951          |
| Asturias (Pdo. de)    | 540                     | 789                       | 190                 | 186            | 175           | 1.880          |
| Castilla - La Mancha  | 1.100                   | 215                       | 125                 | 150            | 90            | 1.680          |
| Baleares (Illes)      | 615                     | 75                        | 130                 | 135            | 322           | 1.277          |
| Cantabria             | 350                     | 380                       | 165                 | 205            | 88            | 1.188          |
| Navarra (C. Foral de) | 340                     | 418                       |                     | 65             | 75            | 898            |
| Rioja (La)            | 260                     | 100                       | 115                 |                | 72            | 547            |

(1) Las titulaciones con oferta de plaza "sin límite" se les ha imputado un total de 30 plazas

## 1.4 Oferta educativa universitaria. Doctorado

**Tabla 1.4.1** Número de titulaciones de Doctorado y número de estudiantes<sup>(1)</sup> de Doctorado por rama de enseñanza (Doctorados regulados por RD 99/2011). Curso 2019-2020

|                               | Total         |                | Universidades públicas |                |              | Universidades privadas |                |             |
|-------------------------------|---------------|----------------|------------------------|----------------|--------------|------------------------|----------------|-------------|
|                               | Nº Doctorados | Nº Estudiantes | Nº Doctorados          | Nº Estudiantes |              | Nº Doctorados          | Nº Estudiantes |             |
|                               |               |                |                        | Total          | %            |                        | Total          | %           |
| <b>Total</b>                  | <b>1.173</b>  | <b>90.426</b>  | <b>1.067</b>           | <b>85.137</b>  | <b>94,2%</b> | <b>113</b>             | <b>5.289</b>   | <b>5,8%</b> |
| <b>Rama de enseñanza</b>      |               |                |                        |                |              |                        |                |             |
| Ciencias Sociales y Jurídicas | 304           | 24.918         | 263                    | 22.675         | 91,0%        | 45                     | 2.243          | 9,0%        |
| Ingeniería y Arquitectura     | 273           | 15.020         | 253                    | 14.295         | 95,2%        | 21                     | 725            | 4,8%        |
| Artes y Humanidades           | 164           | 14.852         | 154                    | 14.473         | 97,4%        | 10                     | 379            | 2,6%        |
| Ciencias de la Salud          | 196           | 22.559         | 171                    | 20.833         | 92,3%        | 27                     | 1.726          | 7,7%        |
| Ciencias                      | 236           | 13.077         | 226                    | 12.861         | 98,3%        | 10                     | 216            | 1,7%        |

**Mapa 1.4.2** Distribución territorial de las titulaciones de Doctorados impartidas por comunidad autónoma. Curso 2020-2021.

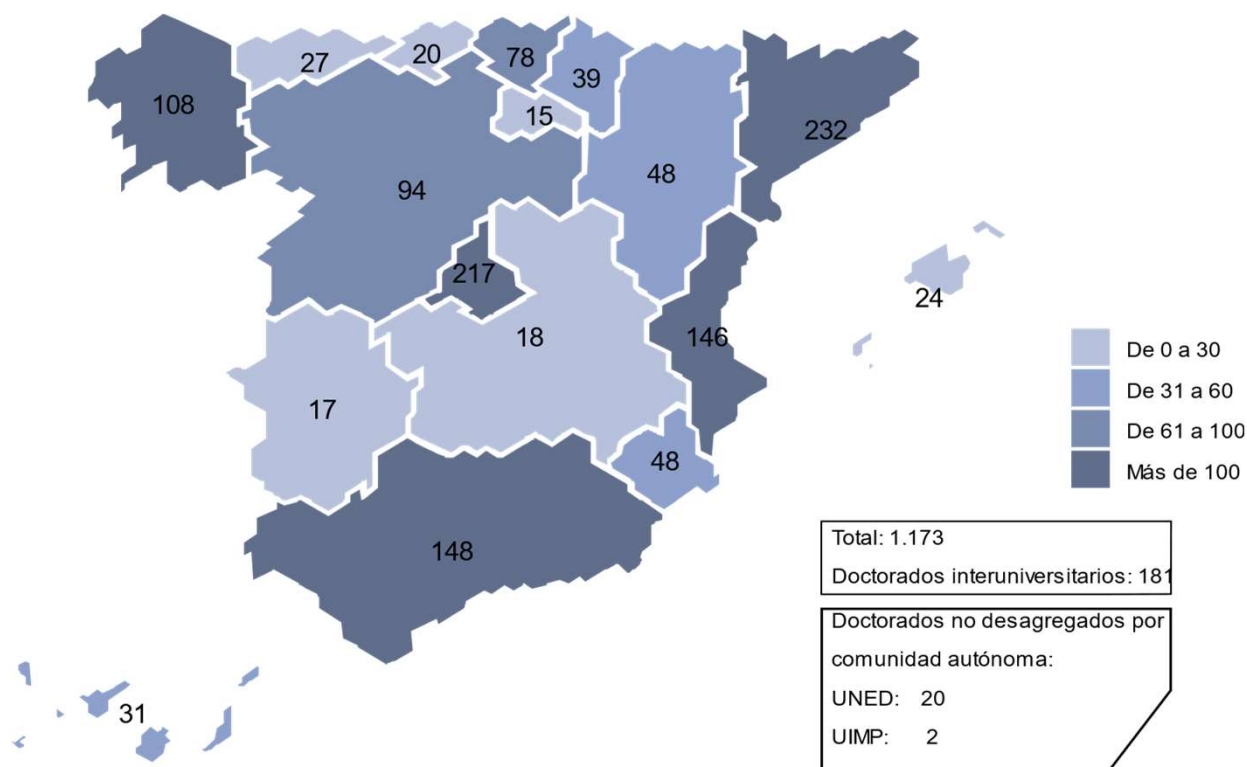

(1) Datos provisionales

## 1.5 Oferta educativa universitaria. Precios públicos de Grado

Tabla 1.5.1 Precios públicos del crédito matriculado por primera vez en titulaciones de Grado por comunidad autónoma. Cursos 2020-2021 y 2021-2022 (€/crédito).

|                              | 2020-2021                   |                             | 2021-2022               |                         |
|------------------------------|-----------------------------|-----------------------------|-------------------------|-------------------------|
|                              | Precio medio <sup>(1)</sup> | Precio medio <sup>(1)</sup> | Mínima experimentalidad | Máxima experimentalidad |
| <b>Precio medio</b>          | <b>17,4</b>                 | <b>17,3</b>                 | -                       | -                       |
| Andalucía                    | 12,6                        | 12,6                        | 12,6                    | 12,6                    |
| Aragón                       | 18,2                        | 18,2                        | 13,5                    | 21,3                    |
| Asturias (Principado de)     | 12,3                        | 12,3                        | 8,6                     | 15,7                    |
| Balears (Illes)              | 16,0                        | 16,0                        | 11,6                    | 20,8                    |
| Canarias                     | 12,5                        | 12,5                        | 9,5                     | 14,6                    |
| Cantabria                    | 13,6                        | 13,5                        | 10,1                    | 15,7                    |
| Castilla-La Mancha           | 15,9                        | 15,9                        | 12,1                    | 18,9                    |
| Castilla y León              | 16,9                        | 16,5                        | 12,6                    | 22,3                    |
| Cataluña <sup>(2)</sup>      | 23,0                        | 23,1                        | 17,7                    | 27,7                    |
| Comunitat Valenciana         | 17,4                        | 17,0                        | 13,2                    | 20,0                    |
| Extremadura                  | 14,8                        | 14,5                        | 10,1                    | 18,1                    |
| Galicia                      | 12,0                        | 11,9                        | 9,9                     | 13,9                    |
| Madrid (Comunidad de)        | 23,4                        | 23,4                        | 21,4                    | 26,1                    |
| Murcia (Región de)           | 15,7                        | 15,7                        | 14,4                    | 16,8                    |
| Navarra (Comunidad Foral de) | 20,1                        | 19,6                        | 15,5                    | 22,0                    |
| País Vasco                   | 17,3                        | 17,0                        | 14,1                    | 19,8                    |
| La Rioja                     | 16,6                        | 16,9                        | 14,1                    | 22,7                    |
| UNED                         | 16,0                        | 16,0                        | 13,2                    | 21,0                    |

Gráfica 1.5.2 Precios públicos del crédito en el máximo grado de experimentalidad matriculado en primera, segunda, tercera y cuarta y sucesivas matrículas en Grado por comunidad autónoma. Curso 2021-2022(€/crédito).

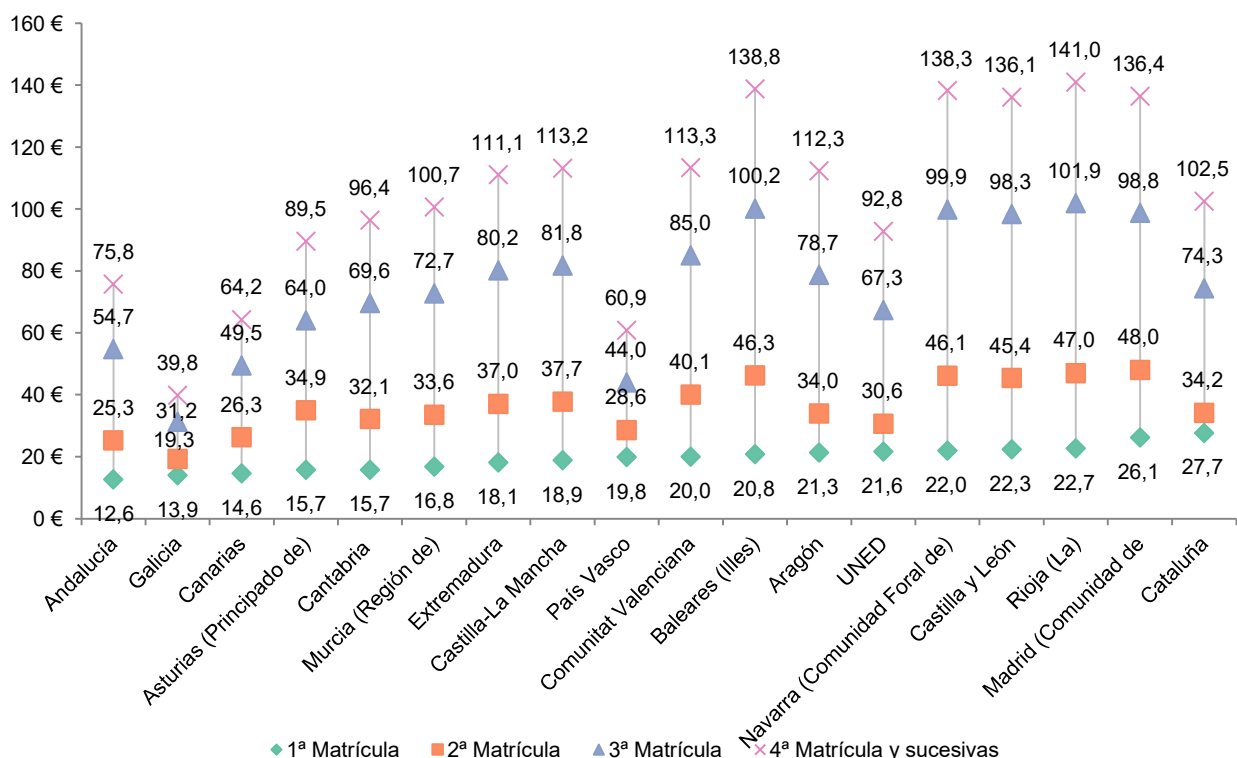

(1) El precio medio de las titulaciones impartidas es una media aritmética del precio de cada una de las titulaciones impartidas por universidades públicas en centros propios y otras unidades universitarias de naturaleza pública.

(2) La Generalitat de Cataluña, las universidades públicas y la Universitat Oberta de Catalunya (UOC), mediante la Agencia de Gestión de Ayudas Universitarias y de Investigación (AGAUR), aplican las becas Equidad, que implican una tarificación del pago del precio por crédito de la matrícula por parte de los y las estudiantes de grado y máster de estas universidades, en función del nivel de renta familiar, por lo que los importes resultantes, una vez descontada la ayuda, corresponderían a los que figuran en el anexo 6 de su boletín.

## 1.6 Oferta educativa universitaria. Precios públicos de Máster

**Tabla 1.6.1** Precios públicos del crédito matriculado por primera vez en titulaciones de Máster por comunidad autónoma (€/crédito). Cursos 2020-2021 y 2021-2022.

| Precio medio                 | Precios medios <sup>(1)</sup> (€ / Crédito) |                 |                             |                 |
|------------------------------|---------------------------------------------|-----------------|-----------------------------|-----------------|
|                              | 2020-2021                                   |                 | 2021-2022                   |                 |
|                              | Habilitantes <sup>(3)</sup>                 | No habilitantes | Habilitantes <sup>(3)</sup> | No habilitantes |
|                              | 22,2                                        | 33,5            | 21,2                        | 31,3            |
| Andalucía                    | 13,7                                        | 13,7            | 13,7                        | 13,7            |
| Aragón                       | 25,0                                        | 36,8            | 20,2                        | 36,7            |
| Asturias (Principado de)     | 18,9                                        | 24,9            | 25,7                        | 26,4            |
| Baleares (Illes)             | 25,0                                        | 27,9            | 25,0                        | 27,9            |
| Canarias                     | 12,5                                        | 13,9            | 12,5                        | 13,9            |
| Cantabria                    | 21,0                                        | 25,9            | 16,9                        | 25,3            |
| Castilla-La Mancha           | 17,4                                        | 15,3            | 17,4                        | 15,3            |
| Castilla y León              | 31,1                                        | 39,3            | 22,5                        | 32,4            |
| Cataluña (2)                 | 28,8                                        | 42,2            | 27,7                        | 25,5            |
| Comunitat Valenciana         | 19,5                                        | 38,5            | 18,8                        | 38,5            |
| Extremadura                  | 24,5                                        | 29,0            | 24,7                        | 29,3            |
| Galicia                      | 12,6                                        | 12,0            | 12,6                        | 11,6            |
| Madrid (Comunidad de)        | 30,4                                        | 51,8            | 30,4                        | 51,7            |
| Murcia (Región de)           | 21,0                                        | 37,4            | 18,9                        | 37,4            |
| Navarra (Comunidad Foral de) | 22,7                                        | 27,9            | 22,0                        | 28,0            |
| País Vasco                   | 24,4                                        | 32,5            | 24,4                        | 32,6            |
| Rioja (La)                   | 28,2                                        | 33,8            | 21,2                        | 30,1            |
| UNED                         | 38,7                                        | 31,3            | 38,7                        | 32,0            |

**Gráfico 6.1.2** Precios públicos del crédito matriculado por primera vez en titulaciones de Máster habilitantes y no habilitantes en mínima y máxima experimentalidad (€ / Crédito). Curso 2021-2022.

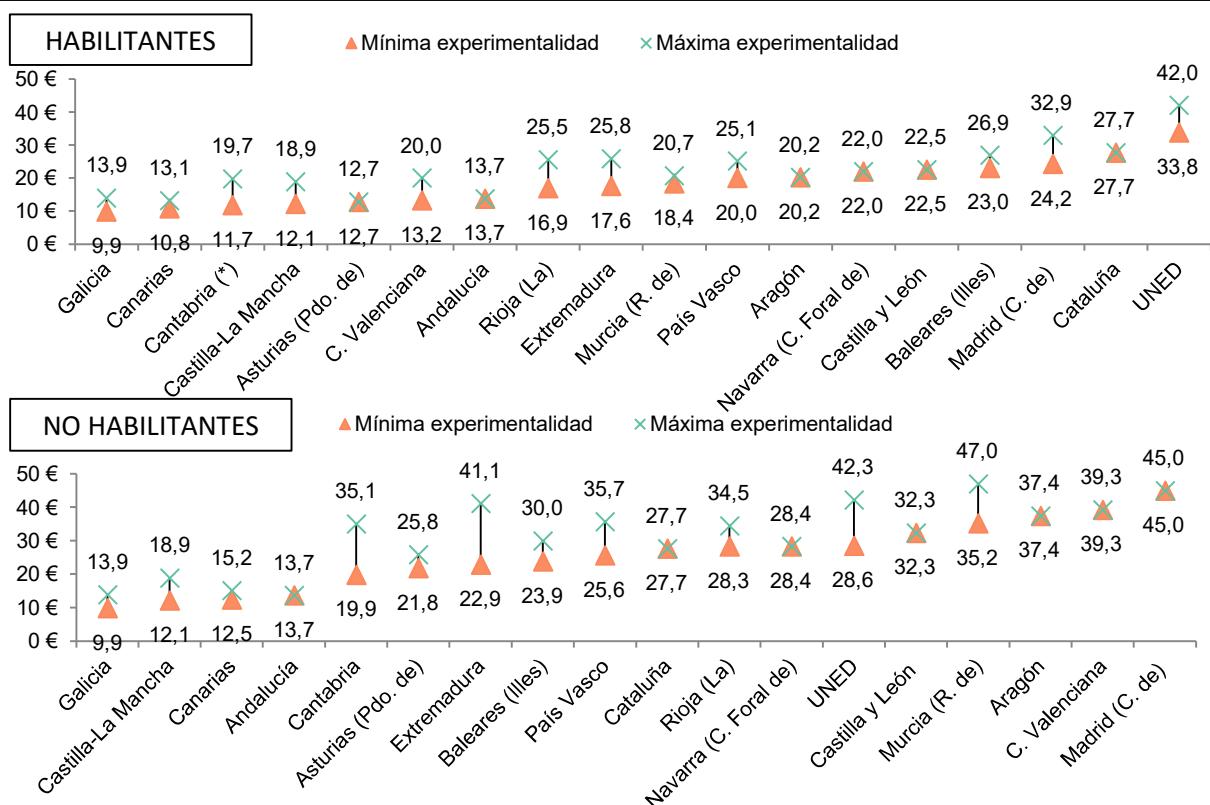

(1) El precio medio de las titulaciones impartidas es una media aritmética del precio de cada una de las titulaciones impartidas por universidades públicas en centros propios y otras unidades universitarias de naturaleza pública.

(2) La Generalitat de Cataluña, las universidades públicas y la Universitat Oberta de Catalunya (UOC), mediante la Agencia de Gestión de Ayudas Universitarias y de Investigación (AGAUR), aplican las becas Equidad, que implican una tarificación del pago del precio por crédito de la matrícula por parte de los y las estudiantes de grado y máster de estas universidades, en función del nivel de renta familiar, por lo que los importes resultantes, una vez descontada la ayuda, corresponderían a los que figuran en el anexo 6 de su boletín.

(3) Se incluyen los Master vinculados a una profesión regulada.



## 1.7 Oferta educativa universitaria. Precios públicos de Doctorado

**Tabla 1.7.1** Precios de la tutela académica para la elaboración de la tesis doctoral. Doctorado regulado por el RD 99/2011 (€).

|                              | Tutela académica |              |                         | Examen de tesis doctoral 2021-2022 |
|------------------------------|------------------|--------------|-------------------------|------------------------------------|
|                              | 2020-2021        | 2021-2022    | Tasa de variación anual |                                    |
| <b>Promedio</b>              | <b>258,6</b>     | <b>254,4</b> | <b>-1,6%</b>            | <b>155,7</b>                       |
| Andalucía                    | 60,3             | 60,3         | 0,0%                    | 127,9                              |
| Aragón                       | 262,0            | 219,0        | -16,4%                  | 167,3                              |
| Asturias (Principado de)     | 200,0            | 200,0        | 0,0%                    | 170,0                              |
| Baleares (Illes)             | 239,1            | 210,0        | -12,2%                  | 152,7                              |
| Canarias                     | 203,8            | 203,8        | 0,0%                    | 149,6                              |
| Cantabria                    | 209,9            | 206,6        | -1,6%                   | 130,8                              |
| Castilla-La Mancha           | 225,9            | 225,9        | 0,0%                    | 260,0                              |
| Castilla y León              | 400,9            | 400,9        | 0,0%                    | 168,5                              |
| Cataluña <sup>(1)</sup>      | 401,1            | 401,1        | 0,0%                    | 156,9                              |
| Comunitat Valenciana         | 300,0            | 300,0        | 0,0%                    | 143,7                              |
| Extremadura                  | 104,0            | 104,0        | 0,0%                    | 125,2                              |
| Galicia                      | 200,0            | 200,0        | 0,0%                    | 117,1                              |
| Madrid (Comunidad de)        | 390,0            | 390,0        | 0,0%                    | 143,2                              |
| Murcia (Región de)           | 388,0            | 388,0        | 0,0%                    | 144,2                              |
| Navarra (Comunidad Foral de) | 323,4            | 323,4        | 0,0%                    | 171,4                              |
| País Vasco                   | 204,5            | 204,5        | 0,0%                    | 159,8                              |
| La Rioja                     | 207,3            | 207,3        | 0,0%                    | 141,4                              |
| U.N.E.D.                     | 335,1            | 335,1        | 0,0%                    | 173,5                              |

**Gráfico 1.7.2** Evolución del precio público promedio de examen de tesis doctoral (€).

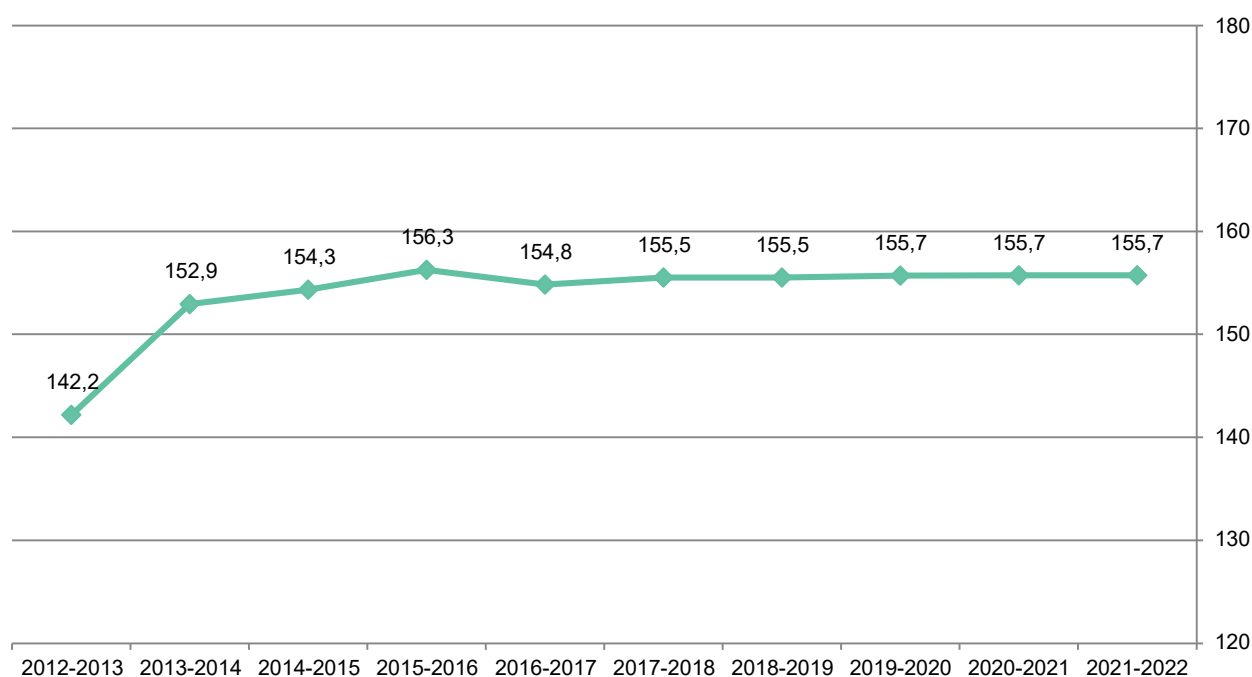

(1) La Generalitat de Catalunya, las universidades públicas y la Universitat Oberta de Catalunya (UOC), mediante la Agencia de Gestión de Ayudas Universitarias y de Investigación (AGAUR), aplican las becas Equidad, que implican una tarificación del pago del precio por crédito de la matrícula por parte de los y las estudiantes de grado y máster de estas universidades, en función del nivel de renta familiar, por lo que los importes resultantes, una vez descontada la ayuda, corresponderían a los que figuran en el anexo 6 de su boletín.

## 2. Pruebas de acceso a la universidad

### PRUEBAS DE ACCESO A LA UNIVERSIDAD

En las Pruebas de Acceso a la Universidad (PAU) de 2020 se matricularon un total de 322.823 estudiantes. Esto supuso un ascenso del 9,5% con respecto a la anterior. Siendo esta la convocatoria con mayor número de matriculados de los últimos años.

La convocatoria genérica continúa siendo la mayoritaria con un 91,3% del total de los matriculados. El número de estudiantes que se presentó finalmente a la prueba fue de 306.820 de los cuales aprobaron 274.278. En el resto de pruebas (para mayores de 25 años, mayores de 45 años y mayores de 40 años con experiencia laboral) hubo un total de 28.177 matriculados, de los cuales 17.263 se presentaron a las pruebas y 10.190 las aprobaron.

En las pruebas de acceso a la universidad, las mujeres continúan siendo mayoría, el porcentaje de mujeres matriculadas respecto al total fue de un 56,9%. Dicho porcentaje desciende, en las pruebas de mayores de 25 y 45 años, hasta aproximadamente el 45%.

Analizando las PAU genéricas, observamos que el 57,8% de los matriculados fueron mujeres, el 5,2% poseía una nacionalidad extranjera y el 7,8% era mayor de 20 años. En la convocatoria extraordinaria el porcentaje de mujeres es 57,5%, el porcentaje de matriculados con nacionalidad extranjera y el de mayores de 20 años aumenta (hasta un 7,4% y un 12,7% respectivamente).

Las comunidades autónomas con mayor porcentaje de aprobados en la convocatoria ordinaria de las PAU genéricas fueron País Vasco y Comunitat Valenciana con 97,2% y 96,9% respectivamente, mientras que los porcentajes más bajos se dieron en Galicia, Canarias y Extremadura con 88,8%, 89,8% y 90,1% respectivamente.

Los estudiantes de Bachillerato que se matricularon en la convocatoria ordinaria en las asignaturas obligatorias: Lengua castellana y literatura, Lengua extranjera (inglés) e Historia de España, tuvieron unos porcentajes de aprobados sobre presentados de 84,6%, 79,1% y 77,1% respectivamente.

**La convocatoria 2020 de las PAU alcanzó el mayor número de matriculados de los últimos años, con 322.823 estudiantes**

**En las pruebas genéricas aprobaron el 89,4% de los presentados**

### **Referencias**

[ANEXO I: Definiciones](#)

[Estadística de las Pruebas de Acceso a la Universidad](#)

[Qué estudiar y dónde en la universidad \(QEDU\)](#)

[Sistema Integrado de Información Universitaria](#)

## 2.1 Pruebas de acceso a la universidad. Datos generales

**Gráfica 2.1.1** Evolución del número de matriculaciones en las PAU. Total y PAU genérica.

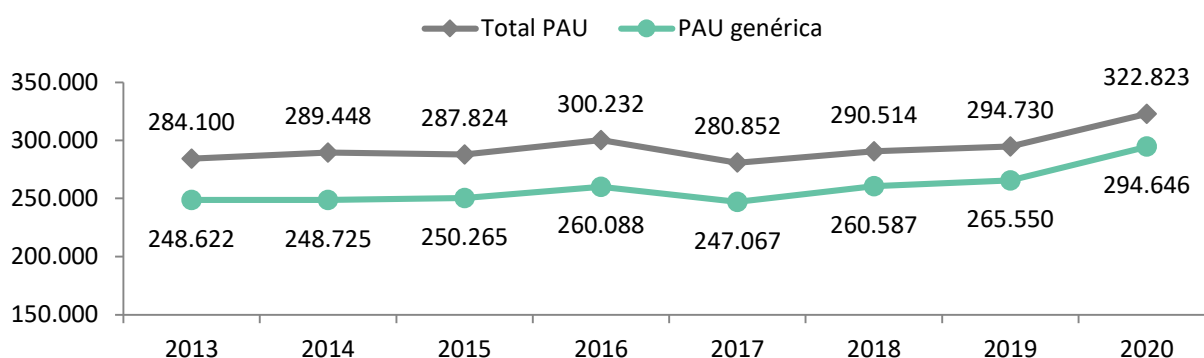

**Gráfica 2.1.2** Número de matriculaciones en las PAU por procedimiento de acceso y convocatoria. Año 2020

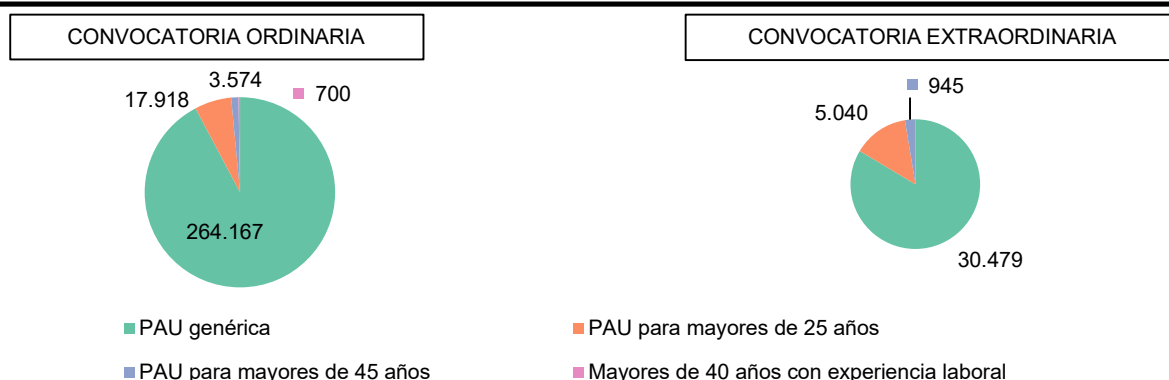

**Tabla 2.1.3** Número de matriculados, presentados y aprobados en las PAU por procedimiento de acceso, convocatoria y sexo. Año 2020

|                                                        | Matriculados   |              | Presentados    |              | Aprobados      |              |
|--------------------------------------------------------|----------------|--------------|----------------|--------------|----------------|--------------|
|                                                        | Total          | Mujeres (%)  | Total          | Mujeres (%)  | Total          | Mujeres (%)  |
| <b>Total PAU</b>                                       | <b>322.823</b> | <b>56,9%</b> | <b>306.820</b> | <b>57,3%</b> | <b>274.278</b> | <b>57,6%</b> |
| PAU genérica convocatoria ordinaria                    | 264.167        | 57,8%        | 261.121        | 57,8%        | 241.956        | 57,9%        |
| PAU genérica convocatoria extraordinaria               | 30.479         | 57,5%        | 28.436         | 57,5%        | 22.132         | 58,0%        |
| PAU para mayores de 25 años                            | 22.958         | 46,4%        | 14.108         | 48,1%        | 8.316          | 45,3%        |
| PAU para mayores de 45 años                            | 4.519          | 51,4%        | 2.517          | 56,4%        | 1.540          | 58,2%        |
| Acceso para mayores de 40 años con experiencia laboral | 700            | 47,7%        | 638            | 46,2%        | 334            | 47,3%        |

**Gráfico 2.1.4** Porcentaje de aprobados entre los presentados a la PAU por procedimiento de acceso, convocatoria y sexo. Año 2020

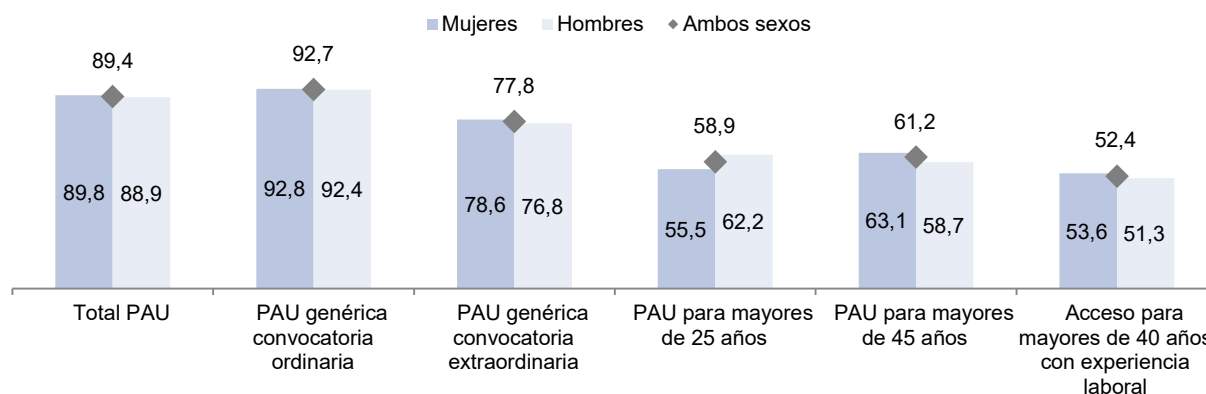

## 2.2 Pruebas de acceso a la universidad. PAU genéricas

**Tabla 2.2.1** Perfil de los alumnos matriculados en las pruebas genéricas de acceso a la universidad. Año 2020

|                                                             | Total          | Mujeres (%)  | Extranjeros (%) | Mayores de 20 años (%) |
|-------------------------------------------------------------|----------------|--------------|-----------------|------------------------|
| <b>Total</b>                                                | <b>294.646</b> | <b>57,8%</b> | <b>5,2%</b>     | <b>7,8%</b>            |
| <b>Convocatoria ordinaria</b>                               | <b>264.167</b> | <b>57,8%</b> | <b>4,9%</b>     | <b>7,2%</b>            |
| Título de Bachiller o equivalente.                          | 242.535        | 57,5%        | 3,6%            | 3,3%                   |
| FP y Artísticas                                             | 14.920         | 64,5%        | 4,3%            | 66,4%                  |
| Extranjeros previa solicitud de homologación <sup>(1)</sup> | 3.041          | 57,7%        | 34,4%           | 6,3%                   |
| Extranjeros con acuerdos internacionales                    | 3.671          | 53,1%        | 66,6%           | 27,0%                  |
| <b>Convocatoria extraordinaria</b>                          | <b>30.479</b>  | <b>57,5%</b> | <b>7,4%</b>     | <b>12,7%</b>           |
| Título de Bachiller o equivalente.                          | 27.637         | 56,9%        | 5,7%            | 7,7%                   |
| FP y Artísticas                                             | 1.991          | 66,7%        | 7,0%            | 74,7%                  |
| Extranjeros previa solicitud de homologación <sup>(1)</sup> | 125            | 64,0%        | 58,4%           | 17,6%                  |
| Extranjeros con acuerdos internacionales                    | 726            | 54,5%        | 66,1%           | 31,4%                  |

**Tabla 2.2.2** Matriculados, presentados y aprobados en las PAU genéricas por comunidad autónoma. Año 2020

|                                   | Matriculados   | Presentados    | Aprobados      | %<br>Aprobados /<br>presentados<br>Conv. Ordinaria<br>(Presentados 261.121) | %<br>Aprobados / presentados<br>Conv. Extraordinaria<br>(Presentados 28.436) |
|-----------------------------------|----------------|----------------|----------------|-----------------------------------------------------------------------------|------------------------------------------------------------------------------|
| <b>TOTAL</b>                      | <b>294.646</b> | <b>289.557</b> | <b>264.088</b> | <b>92,7%</b>                                                                | <b>77,8%</b>                                                                 |
| Andalucía                         | 59.149         | 57.879         | 52.156         | 91,8%                                                                       | 78,5%                                                                        |
| Aragón                            | 7.874          | 7.780          | 7.214          | 93,4%                                                                       | 85,1%                                                                        |
| Asturias (Principado de)          | 5.447          | 5.411          | 5.064          | 94,7%                                                                       | 82,7%                                                                        |
| Baleares (Illes)                  | 5.848          | 5.788          | 5.166          | 90,4%                                                                       | 77,7%                                                                        |
| Canarias                          | 13.130         | 12.806         | 11.335         | 89,8%                                                                       | 74,5%                                                                        |
| Cantabria                         | 3.383          | 3.350          | 3.127          | 94,3%                                                                       | 82,1%                                                                        |
| Castilla - La Mancha              | 10.509         | 10.221         | 9.393          | 94,1%                                                                       | 68,5%                                                                        |
| Castilla y León                   | 13.469         | 13.372         | 12.607         | 95,0%                                                                       | 85,5%                                                                        |
| Cataluña                          | 44.302         | 43.199         | 39.423         | 92,7%                                                                       | 77,3%                                                                        |
| Comunitat Valenciana              | 25.174         | 24.808         | 23.728         | 96,9%                                                                       | 83,9%                                                                        |
| Extremadura                       | 7.061          | 6.933          | 6.133          | 90,1%                                                                       | 73,5%                                                                        |
| Galicia                           | 16.058         | 15.834         | 13.817         | 88,8%                                                                       | 71,8%                                                                        |
| Madrid (Comunidad de)             | 45.365         | 44.782         | 40.378         | 91,9%                                                                       | 72,0%                                                                        |
| Murcia (Región de)                | 10.382         | 10.254         | 9.300          | 92,1%                                                                       | 81,3%                                                                        |
| Navarra (Comunidad Foral de)      | 4.072          | 4.043          | 3.853          | 96,4%                                                                       | 78,6%                                                                        |
| País Vasco                        | 14.248         | 14.033         | 13.525         | 97,2%                                                                       | 85,8%                                                                        |
| Rioja (La)                        | 1.777          | 1.695          | 1.542          | 92,0%                                                                       | 70,7%                                                                        |
| Nacional de Educación a Distancia | 7.398          | 7.369          | 6.327          | 86,9%                                                                       | 77,6%                                                                        |

**Tabla 2.2.3** Número de alumnos matriculados en las pruebas genéricas de acceso a la universidad según las fases a las que se presentan. Año 2020

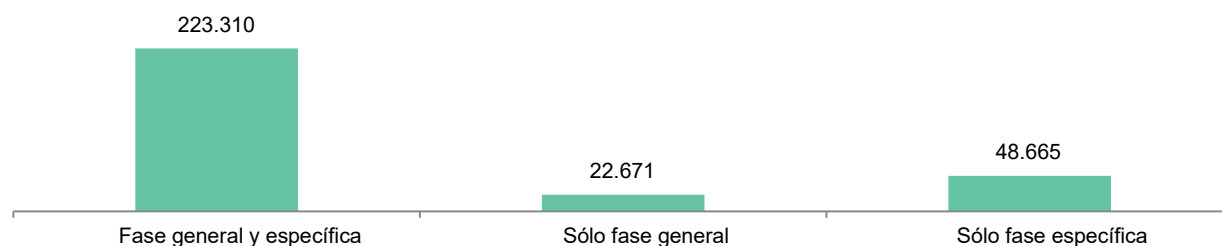

(1) Se refiere a estudiantes con titulaciones obtenidas en sistemas educativos extranjeros y que han solicitado la homologación al título español de bachiller, no necesariamente son estudiantes con nacionalidad extranjera.

## 2.3 Pruebas de acceso a la universidad. Bachillerato y FP

**Tabla 2.3.1** Resultados en las materias de la fase general de los estudiantes procedentes del bachillerato, presentados a las Pruebas de Acceso a la Universidad. Convocatoria ordinaria. Año 2020

|                                                  | % estudiantes matriculados por materia respecto al total de matriculados |         | % estudiantes aprobados respecto presentados |         | Nota media de los estudiantes aprobados en la materia |         |
|--------------------------------------------------|--------------------------------------------------------------------------|---------|----------------------------------------------|---------|-------------------------------------------------------|---------|
|                                                  | Total                                                                    | Mujeres | Total                                        | Mujeres | Total                                                 | Mujeres |
| <b>Materias de la fase general<sup>(1)</sup></b> |                                                                          |         |                                              |         |                                                       |         |
| Lengua castellana y literatura                   | 100,0%                                                                   | 100,0%  | 84,6%                                        | 86,7%   | 7,23                                                  | 7,31    |
| Historia de España                               | 100,0%                                                                   | 100,0%  | 77,1%                                        | 77,3%   | 7,56                                                  | 7,61    |
| Lengua extranjera: inglés                        | 97,3%                                                                    | 96,9%   | 79,1%                                        | 77,9%   | 7,58                                                  | 7,61    |
| Matemáticas II                                   | 47,8%                                                                    | 41,8%   | 74,5%                                        | 75,0%   | 7,76                                                  | 7,77    |
| Matemáticas aplicadas a las ciencias sociales II | 37,0%                                                                    | 38,5%   | 70,1%                                        | 71,0%   | 7,41                                                  | 7,42    |
| Lengua cooficial                                 | 36,9%                                                                    | 37,5%   | 86,8%                                        | 88,7%   | 7,25                                                  | 7,34    |
| Latín II                                         | 10,9%                                                                    | 14,0%   | 78,4%                                        | 79,7%   | 7,40                                                  | 7,43    |
| Fundamentos del arte II                          | 4,3%                                                                     | 5,7%    | 82,1%                                        | 82,4%   | 7,44                                                  | 7,44    |
| Lengua extranjera: francés                       | 2,3%                                                                     | 2,7%    | 87,5%                                        | 87,2%   | 7,72                                                  | 7,70    |

**Tabla 2.3.2** Resultados en las materias de la fase específica de los estudiantes de Bachillerato y FP presentados a las Pruebas de Acceso a la Universidad. Convocatoria ordinaria. Año 2020

|                                                  | % estudiantes aprobados respecto presentados |        | Nota media de la materia |      | Nota media de los aprobados en la materia |      |
|--------------------------------------------------|----------------------------------------------|--------|--------------------------|------|-------------------------------------------|------|
|                                                  | Bachillerato                                 | FP     | Bachillerato             | FP   | Bachillerato                              | FP   |
| <b>Materias de la fase específica</b>            |                                              |        |                          |      |                                           |      |
| Química                                          | 74,3%                                        | 63,9%  | 6,40                     | 5,54 | 7,62                                      | 7,28 |
| Biología                                         | 79,7%                                        | 73,7%  | 6,69                     | 6,16 | 7,59                                      | 7,30 |
| Economía de la empresa                           | 78,9%                                        | 80,2%  | 6,61                     | 6,47 | 7,52                                      | 7,27 |
| Física                                           | 73,7%                                        | 57,3%  | 6,44                     | 5,16 | 7,79                                      | 7,26 |
| Historia de la filosofía                         | 77,8%                                        | 68,8%  | 6,36                     | 5,79 | 7,31                                      | 6,96 |
| Geografía                                        | 75,5%                                        | 73,8%  | 6,06                     | 5,84 | 6,92                                      | 6,70 |
| Dibujo técnico II                                | 80,8%                                        | 73,2%  | 6,96                     | 6,12 | 7,88                                      | 7,38 |
| Historia del arte                                | 73,0%                                        | 73,3%  | 6,16                     | 6,04 | 7,28                                      | 7,12 |
| Griego II                                        | 86,0%                                        | 69,6%  | 7,16                     | 5,61 | 7,79                                      | 6,85 |
| Cultura audiovisual                              | 92,0%                                        | 95,4%  | 7,26                     | 7,73 | 7,58                                      | 7,91 |
| Matemáticas aplicadas a las ciencias sociales II | 80,7%                                        | 69,7%  | 6,76                     | 5,99 | 7,60                                      | 7,38 |
| Lengua extranjera: francés                       | 90,9%                                        | 87,1%  | 7,41                     | 6,86 | 7,77                                      | 7,39 |
| Matemáticas II                                   | 76,7%                                        | 64,1%  | 6,65                     | 5,59 | 7,74                                      | 7,26 |
| Diseño                                           | 86,5%                                        | 78,9%  | 6,68                     | 6,28 | 7,16                                      | 7,08 |
| Tecnología industrial II                         | 79,2%                                        | 51,4%  | 6,63                     | 4,82 | 7,52                                      | 6,82 |
| Literatura catalana                              | 77,0%                                        | 46,8%  | 6,25                     | 4,55 | 7,09                                      | 6,45 |
| Ciencias de la tierra y medioambientales         | 89,7%                                        | 76,0%  | 6,61                     | 6,11 | 6,95                                      | 6,89 |
| Literatura castellana                            | 70,9%                                        | 52,5%  | 6,00                     | 4,78 | 7,22                                      | 6,92 |
| Geología                                         | 69,6%                                        | 51,4%  | 5,67                     | 4,68 | 6,80                                      | 6,51 |
| Dibujo artístico II                              | 95,7%                                        | 90,9%  | 7,65                     | 7,13 | 7,81                                      | 7,48 |
| Lengua extranjera: inglés                        | 88,9%                                        | 76,0%  | 7,52                     | 6,29 | 8,00                                      | 7,17 |
| Artes escénicas                                  | 87,4%                                        | 65,2%  | 6,90                     | 6,25 | 7,41                                      | 7,92 |
| Electrotecnia                                    | 54,6%                                        | 25,0%  | 5,06                     | 3,17 | 6,70                                      | 5,50 |
| Latín II                                         | 81,9%                                        | 68,5%  | 6,80                     | 5,65 | 7,50                                      | 6,77 |
| Lengua extranjera: alemán                        | 89,3%                                        | 100,0% | 7,62                     | 8,63 | 8,12                                      | 8,63 |

(1) Solo se muestran las asignaturas con un porcentaje de estudiantes matriculados con respecto al total de matriculados mayor del 1%.



# 3 Estudiantes en el Sistema Universitario Español

## MATRÍCULA Y TASA DE ESCOLARIZACIÓN

Durante el curso 2020-2021 el total de matriculados en universidades españolas fue de 1.679.518, aproximadamente el 80% fueron de Grado, el 15% de Máster y el 5% de Doctorado.

Las universidades no presenciales tuvieron 291.165 matriculados lo que supone el 17,4% del total de alumnos.

La tasa neta de escolarización en Educación Universitaria, que mide el porcentaje de población entre 18 y 24 años que está matriculado en estudios de Grado o Máster, se sitúa en un 32,0%, es decir, aproximadamente uno de cada tres jóvenes de 18 a 24 años está matriculado en una titulación universitaria. Se observan importantes diferencias en las tasas de escolarización entre las Comunidades Autónomas, por los alumnos que viajan a diario o cambian de residencia para estudiar en otra Comunidad Autónoma. Aumentando las tasas de las Comunidades Autónomas que reciben más alumnos y disminuyendo las tasas de las Comunidades Autónomas de las que salen estos.

**El porcentaje de mujeres matriculadas varía según ramas. En Ciencias de la Salud fue un 71,4% y en Ingeniería y Arquitectura un 25,7%.**

## MATRICULADOS Y EGRESADOS

De los estudiantes matriculados en el curso 2020-2021, un 55,6% del total fueron mujeres, y según el nivel académico, un 56,0% en Grado, un 55,4% en Máster y un 50,1% en Doctorado.

El porcentaje de mujeres varía sensiblemente entre ramas de enseñanza. Para matriculados en 2020/2021, hubo elevados porcentajes en Ciencias de la Salud (71,4%) y bajos porcentajes en Ingeniería y Arquitectura (25,7%). La rama con los resultados más equilibrados fue Ciencias (50,7%). Estas cifras fueron semejantes en Máster, mientras que en Doctorado el porcentaje de hombres es más parejo en las ramas de Ciencias Sociales y Jurídicas y Artes y Humanidades.

## Referencias

[ANEXO I: Definiciones](#)

[Estadística de Estudiantes Universitarios](#)

[Población de 18 a 24 años: Cifras de población a 1 de enero del segundo año de cada curso académico \(INE\)](#)

[Sistema Integrado de Información Universitaria \(SIIU\)](#)

### 3.1 Estudiantes en el SUE. Tasa de escolarización y matriculados

**Tabla 3.1.1** Tasa neta de escolarización universitaria y distribución del número de estudiantes matriculados de Grado, 1er y 2o Ciclo, Máster y Doctorado por comunidad autónoma. Curso 2020-2021<sup>(1)</sup>

|                              | Tasa neta de escolarización en Educación Universitaria <sup>(2)</sup> | Total matrícula  | Grado            | Máster         | Doctorado regulado por RD 99/2011 |
|------------------------------|-----------------------------------------------------------------------|------------------|------------------|----------------|-----------------------------------|
| <b>TOTAL</b>                 | <b>32,0%</b>                                                          | <b>1.679.518</b> | <b>1.340.632</b> | <b>248.460</b> | <b>90.426</b>                     |
| <b>Univ. Presenciales</b>    | -                                                                     | <b>1.386.390</b> | <b>1.125.038</b> | <b>173.501</b> | <b>87.851</b>                     |
| Andalucía                    | 27,9%                                                                 | 245.926          | 205.599          | 25.819         | 14.508                            |
| Aragón                       | 30,0%                                                                 | 34.730           | 29.533           | 2.822          | 2.375                             |
| Asturias (Principado de)     | 29,1%                                                                 | 21.136           | 17.569           | 1.919          | 1.648                             |
| Balears (Illes)              | 11,3%                                                                 | 14.412           | 11.972           | 1.510          | 930                               |
| Canarias                     | 18,1%                                                                 | 43.267           | 36.707           | 4.581          | 1.979                             |
| Cantabria                    | 27,5%                                                                 | 15.739           | 10.470           | 4.616          | 653                               |
| Castilla-La Mancha           | 14,1%                                                                 | 26.757           | 23.060           | 2.142          | 1.555                             |
| Castilla y León              | 40,4%                                                                 | 85.122           | 69.868           | 10.072         | 5.182                             |
| Cataluña                     | 29,8%                                                                 | 218.207          | 177.304          | 26.091         | 14.812                            |
| Comunitat Valenciana         | 31,8%                                                                 | 155.687          | 123.693          | 21.242         | 10.752                            |
| Extremadura                  | 19,1%                                                                 | 19.319           | 16.593           | 1.765          | 961                               |
| Galicia                      | 28,8%                                                                 | 61.894           | 50.255           | 6.462          | 5.177                             |
| Madrid (Comunidad de)        | 46,4%                                                                 | 306.066          | 239.739          | 48.285         | 18.042                            |
| Murcia (Región de)           | 29,3%                                                                 | 52.943           | 43.325           | 6.536          | 3.082                             |
| Navarra (Comunidad Foral de) | 33,9%                                                                 | 21.283           | 16.425           | 3.445          | 1.413                             |
| País Vasco                   | 33,9%                                                                 | 59.501           | 49.340           | 5.644          | 4.517                             |
| Rioja (La)                   | 15,8%                                                                 | 4.401            | 3.586            | 550            | 265                               |
| <b>Univ. No Presenciales</b> | -                                                                     | <b>291.165</b>   | <b>215.594</b>   | <b>73.113</b>  | <b>2.458</b>                      |
| <b>Univ. Especiales</b>      | -                                                                     | <b>1.963</b>     | <b>0</b>         | <b>1.846</b>   | <b>117</b>                        |

**Gráfico 3.1.2** Evolución de la población de 18 a 24 años, de los matriculados en Grado y 1<sup>er</sup> y 2<sup>o</sup> Ciclo y Máster y de la tasa neta de escolarización en educación universitaria

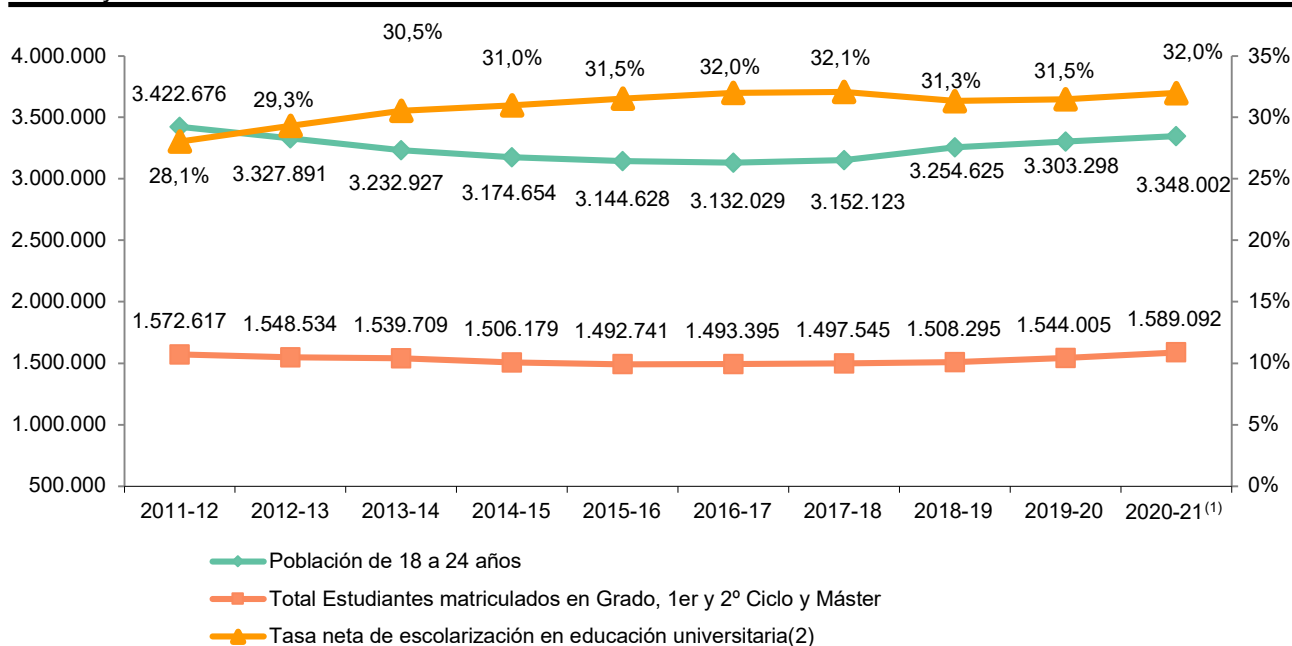

(1) Datos provisionales

(2) Número de estudiantes de 18-24 años en enseñanzas de Grado, 1er y 2º ciclo y Máster dividida entre la población de 18-24 años. La población de Ceuta y Melilla está incluida en Andalucía.

## 3.2 Estudiantes en el SUE. Matriculados y egresados

**Tabla 3.2.1** Número de estudiantes matriculados y egresados en el Sistema Universitario Español por sexo.

|                                                            | Matriculados(1) (2020-21) |              | Egresados (2019-20) |              |
|------------------------------------------------------------|---------------------------|--------------|---------------------|--------------|
|                                                            | Total                     | % de mujeres | Total               | % de mujeres |
| <b>Total estudiantes</b>                                   | <b>1.679.518</b>          | <b>55,6%</b> | <b>348.965</b>      | <b>59,2%</b> |
| <b>Estudiantes de Grado</b>                                | 1.340.632                 | 56,0%        | 208.302             | 59,8%        |
| <b>Estudiantes de 1<sup>er</sup> y 2<sup>o</sup> ciclo</b> | 0                         | 0,0%         | 43                  | 0,0%         |
| <b>Estudiantes de Máster</b>                               | 248.460                   | 55,4%        | 131.267             | 58,9%        |
| <b>Estudiantes de Doctorado RD 99/2011</b>                 | 90.426                    | 50,1%        | 9.353               | 48,6%        |

**Gráfico 3.2.2** Distribución del número de estudiantes de Grado y 1<sup>er</sup> y 2<sup>o</sup> Ciclo por rama de enseñanza y sexo.

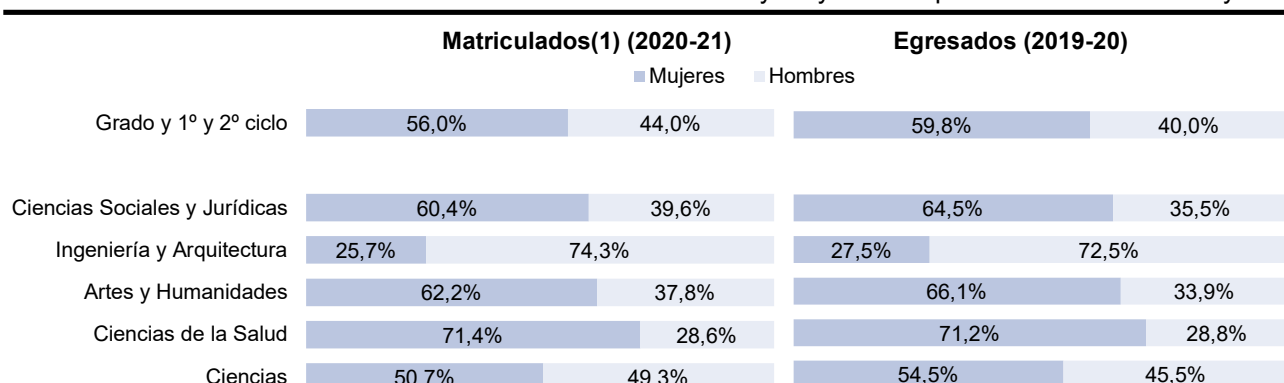

**Gráfico 3.2.3** Distribución del número de estudiantes de Máster por rama de enseñanza y sexo.

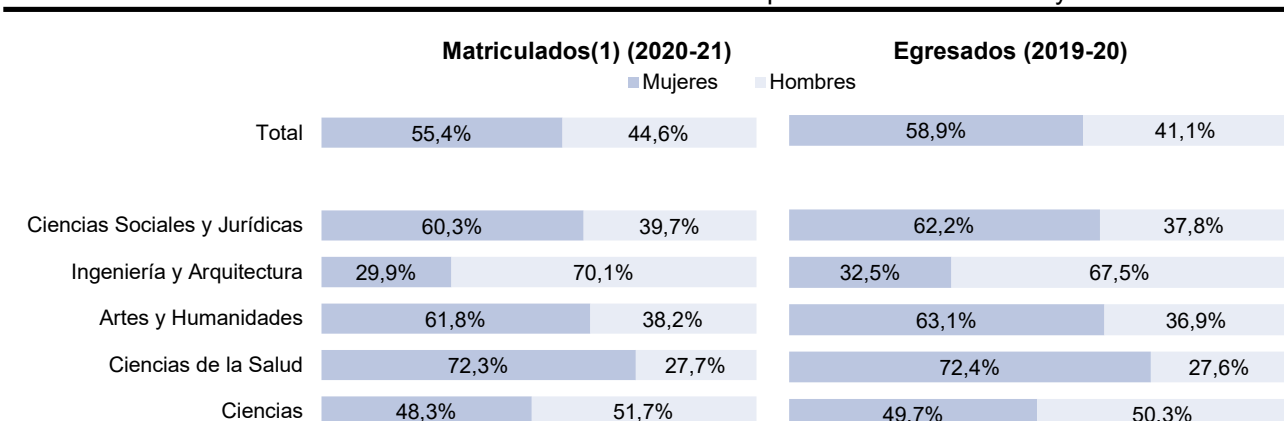

**Gráfico 3.2.4** Distribución del número de estudiantes matriculados en Doctorado RD 99/2011 por rama de enseñanza y sexo. Curso 2020-2021<sup>(1)</sup>

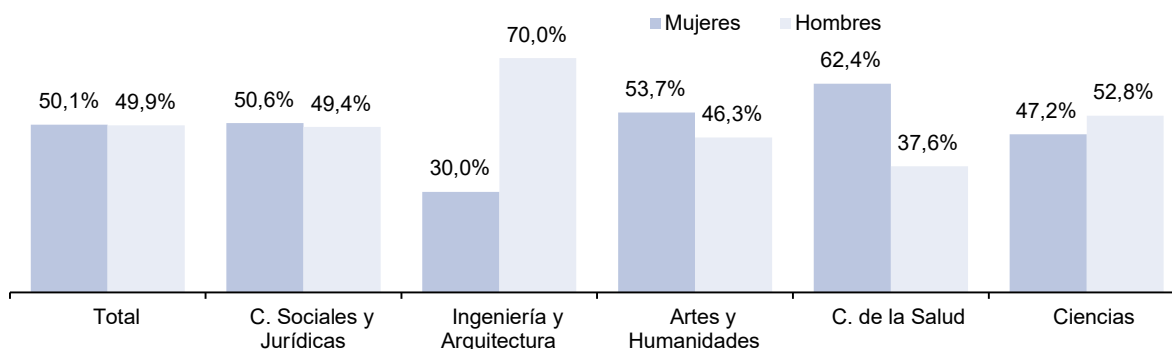

(1) Datos provisionales



## 4 Estudiantes de Grado

### MOVILIDAD INTERNA DE LOS ESTUDIANTES DE GRADO

Aproximadamente el 95% de los estudiantes que hacen las PAU en Cataluña y Madrid, no cambian de comunidad autónoma al matricularse en una universidad presencial. En el caso de Castilla-La Mancha, Baleares y Extremadura este porcentaje ronda el 50%, mientras que en La Rioja se queda en el 34,3%.

Por otro lado, las CCAA que atraen mayor porcentaje de estudiantes de fuera son Castilla y León, Navarra, La Rioja y Madrid con más de un 30% de estudiantes matriculados en universidades presenciales con la residencia habitual en otra comunidad.

A nivel global, el 17,5% de los estudiantes de Grado en universidades presenciales se matricula en un centro de una comunidad autónoma diferente a la que tiene su residencia habitual y el 30,4% en una provincia distinta.

**El 30,4% de los estudiantes de Grado en U. presenciales se matricula en una provincia diferente de la que reside.**

**Las notas de corte tienen tendencia al alza, especialmente en los ámbitos de Matemáticas y estadística y en Informática.**

### PREINSCRIPCIÓN EN ESTUDIOS DE GRADO. UNIVERSIDADES PÚBLICAS PRESENCIALES

La tasa de adecuación en el curso 2020-2021 fue del 69,0% (son los estudiantes que pudieron matricularse en su primera opción del proceso de preinscripción).

La tasa de ocupación (plazas ofertadas cubiertas) varió entre las ramas de enseñanza, del 99,0% en Ciencias de la salud al 84,5% en Artes y humanidades.

Respecto a la tasa de preferencia (solicitudes en primera opción por cada plaza ofertada) destaca la rama de Ciencias de la salud con un 454,2% (más de 4 alumnos por cada plaza).

A nivel global, pese a que tanto la matrícula de nuevo ingreso como la oferta de plazas se mantienen estables en los últimos años, se observan variaciones por rama de enseñanza, mientras que la matrícula de nuevo ingreso en Ingeniería y Arquitectura cae un 11,7% aumenta en Ciencias un 12,0%.

Las notas de corte varían según los ámbitos de estudio. Las más altas están en Medicina, Veterinaria, Matemáticas y estadística, Enfermería y Deportes. Se observa una tendencia al alza de las notas de corte muy especialmente en Matemáticas y estadística y en Informática.

### MATRICULADOS Y EGRESADOS EN GRADO

En el curso 2020-2021 hubo un aumento del número de matriculados en Grado continuando con la tendencia ascendente que comenzó en 2018-2019, el presente curso cuenta con 44.253 estudiantes más que el anterior. El 82,8% de los alumnos matriculados lo hace en una universidad pública.

El número de estudiantes egresados en el curso 2019-2020 en estudios de Grado fue 208.345, lo que supone un aumento del 10,0% con respecto al año anterior.

El 52,9% de los estudiantes matriculados de Grado tienen entre 18 y 21 años. Esta cifra baja a 47,6% en la rama de Arte y Humanidades y sube hasta el 64,0% en la de Ciencias. En el caso de los estudiantes egresados, el 4,1% son mayores de 40 años, siendo únicamente el 0,8% para la rama de Ciencias.

En las edades medias de Grado por ámbito se comprueba que las universidades no presenciales tienen alumnos de más edad que las presenciales (superándolos en más de 10 años de media).

El porcentaje de mujeres matriculadas varía ampliamente atendiendo al ámbito de estudio, mientras que en el ámbito de la Informática se sitúa cerca del 15%, en Educación supera el 70%.

### Referencias

[ANEXO I: Definiciones](#)

[Estadística de Estudiantes Universitarios](#)

[Sistema Integrado de Información Universitaria \(SIIU\)](#)

## 4.1 Estudiantes de Grado. Movilidad interna

**Tabla 4.1.1** Movilidad de los estudiantes universitarios aptos en la fase general de las PAU por comunidad autónoma donde se han matriculado<sup>(1)(2)</sup>. Estudiantes matriculados en universidades presenciales.  
Curso 2020-2021

| Comunidad Autónoma de realización de las PAU | Comunidad autónoma del centro donde se matricula |              |                     |                 |              |              |                    |
|----------------------------------------------|--------------------------------------------------|--------------|---------------------|-----------------|--------------|--------------|--------------------|
|                                              | Andalucía                                        | Aragón       | Asturias (Ppdo. de) | Balears (Illes) | Canarias     | Cantabria    | Castilla la Mancha |
| Andalucía                                    | <b>89,1%</b>                                     |              |                     |                 |              |              |                    |
| Aragón                                       | 1,0%                                             | <b>80,5%</b> |                     |                 |              |              |                    |
| Asturias (Ppdo. de)                          |                                                  |              | <b>79,1%</b>        |                 |              |              |                    |
| Balears (Illes)                              | 5,1%                                             |              |                     | <b>55,6%</b>    |              |              |                    |
| Canarias                                     | 4,6%                                             |              |                     |                 | <b>79,4%</b> |              |                    |
| Cantabria                                    | 1,7%                                             |              | 1,9%                |                 |              | <b>65,9%</b> |                    |
| Castilla-La Mancha                           | 6,8%                                             |              |                     |                 |              |              | <b>49,4%</b>       |
| Castilla y León                              |                                                  | 1,1%         | 1,1%                |                 |              |              |                    |
| Cataluña                                     |                                                  |              |                     |                 |              |              |                    |
| C. Valenciana                                | 1,0%                                             |              |                     |                 |              |              |                    |
| Estado (UNED)                                | 7,3%                                             | 2,2%         |                     |                 | 1,0%         |              | 1,3%               |
| Extremadura                                  | 19,2%                                            |              |                     |                 |              |              | 1,5%               |
| Galicia                                      |                                                  |              |                     |                 |              |              |                    |
| Madrid (Com. de)                             |                                                  |              |                     |                 |              |              | 2,2%               |
| Murcia (Región de)                           | 3,9%                                             |              |                     |                 |              |              |                    |
| Navarra (C. Foral de)                        |                                                  | 5,3%         |                     |                 |              |              |                    |
| País Vasco                                   |                                                  |              |                     |                 |              |              |                    |
| Rioja (La)                                   |                                                  | 8,8%         |                     |                 |              |              |                    |

(1) Estudiantes matriculados y aptos en la fase general de las PAU genéricas y de los matriculados sólo en la fase específica de dichas PAU genéricas. Se excluyen las pruebas para mayores de 25 y de 45 años

(2) No se muestran los datos inferiores a un 1% ni los que representan a un número de estudiantes menores a 25.

(3) Interpretación de la tabla: De los estudiantes aptos en PAU de Canarias que se matriculan en universidades presenciales, el 79,4% se queda en Canarias y, por ejemplo, un 4,6% se matriculan en Andalucía.

## 4.1 Estudiantes de Grado. Movilidad interna

**Tabla 4.1.1** Movilidad de los estudiantes universitarios aptos en la fase general de las PAU por comunidad autónoma donde se han matriculado<sup>(1)(2)</sup>. Estudiantes matriculados en universidades presenciales.  
Curso 2020-2021 (continuación)

| Comunidad Autónoma de realización de las PAU | Comunidad autónoma del centro donde se matricula |              |               |              |              |                  |                  |                       |              |              |
|----------------------------------------------|--------------------------------------------------|--------------|---------------|--------------|--------------|------------------|------------------|-----------------------|--------------|--------------|
|                                              | Castilla y León                                  | Cataluña     | C. Valenciana | Extremadura  | Galicia      | Madrid (Com. de) | Murcia (Reg. de) | Navarra (C. Foral de) | País Vasco   | Rioja (La)   |
| Andalucía                                    |                                                  |              |               |              |              | 4,0%             | 1,1%             |                       |              |              |
| Aragón                                       | 1,6%                                             | 4,3%         | 4,3%          |              |              | 4,8%             |                  | 1,8%                  |              |              |
| Asturias (Ppdo. de)                          | 7,5%                                             |              |               |              | 3,0%         | 6,1%             |                  |                       |              |              |
| Balears (Illes)                              | 1,6%                                             | 18,8%        | 6,0%          |              |              | 10,4%            |                  |                       |              |              |
| Canarias                                     | 1,8%                                             | 1,1%         | 1,7%          |              |              | 8,8%             |                  |                       |              |              |
| Cantabria                                    | 12,1%                                            | 1,0%         |               |              |              | 8,2%             |                  |                       | 5,3%         |              |
| Castilla-La Mancha                           | 2,3%                                             |              | 13,0%         |              |              | 23,6%            | 2,4%             |                       |              |              |
| Castilla y León                              | <b>75,3%</b>                                     |              | 1,1%          |              | 1,9%         | 13,3%            |                  | 1,0%                  | 1,6%         |              |
| Cataluña                                     |                                                  | <b>98,3%</b> |               |              |              |                  |                  |                       |              |              |
| C. Valenciana                                |                                                  | 2,4%         | <b>90,3%</b>  |              |              | 2,1%             | 2,2%             |                       |              |              |
| Estado (UNED)                                | 6,6%                                             | 14,8%        | 25,2%         |              | 3,0%         | 32,9%            | 2,5%             |                       |              |              |
| Extremadura                                  | 12,0%                                            |              |               | <b>54,3%</b> |              | 10,1%            |                  |                       |              |              |
| Galicia                                      | 3,0%                                             | 1,2%         |               |              | <b>86,7%</b> | 5,9%             |                  |                       |              |              |
| Madrid (Com. de)                             |                                                  |              |               |              |              | <b>94,9%</b>     |                  |                       |              |              |
| Murcia (Región de)                           |                                                  |              | 7,1%          |              |              | 3,2%             | <b>83,5%</b>     |                       |              |              |
| Navarra (C. Foral de)                        | 5,0%                                             | 2,8%         | 1,8%          |              |              | 4,8%             |                  | <b>63,2%</b>          | 12,4%        | 2,5%         |
| País Vasco                                   | 2,9%                                             | 1,6%         |               |              |              | 3,2%             |                  | 2,7%                  | <b>86,2%</b> |              |
| Rioja (La)                                   | 16,3%                                            |              | 2,9%          |              |              | 11,8%            |                  | 8,5%                  | 10,2%        | <b>34,3%</b> |

(1) Estudiantes matriculados y aptos en la fase general de las PAU genéricas y de los matriculados sólo en la fase específica de dichas PAU genéricas. Se excluyen las pruebas para mayores de 25 y de 45 años

(2) No se muestran los datos inferiores a un 1% ni los que representan a un número de estudiantes menores a 25.

(3) Interpretación de la tabla: De los estudiantes aptos en PAU de Canarias que se matriculan en universidades presenciales, el 79,4% se queda en Canarias y, por ejemplo, un 4,6% se matriculan en Andalucía.



## 4.1 Estudiantes de Grado. Movilidad interna

**Mapa 4.1.2** Número de matriculados en universidades presenciales por provincia de residencia habitual. Curso 2019-2020

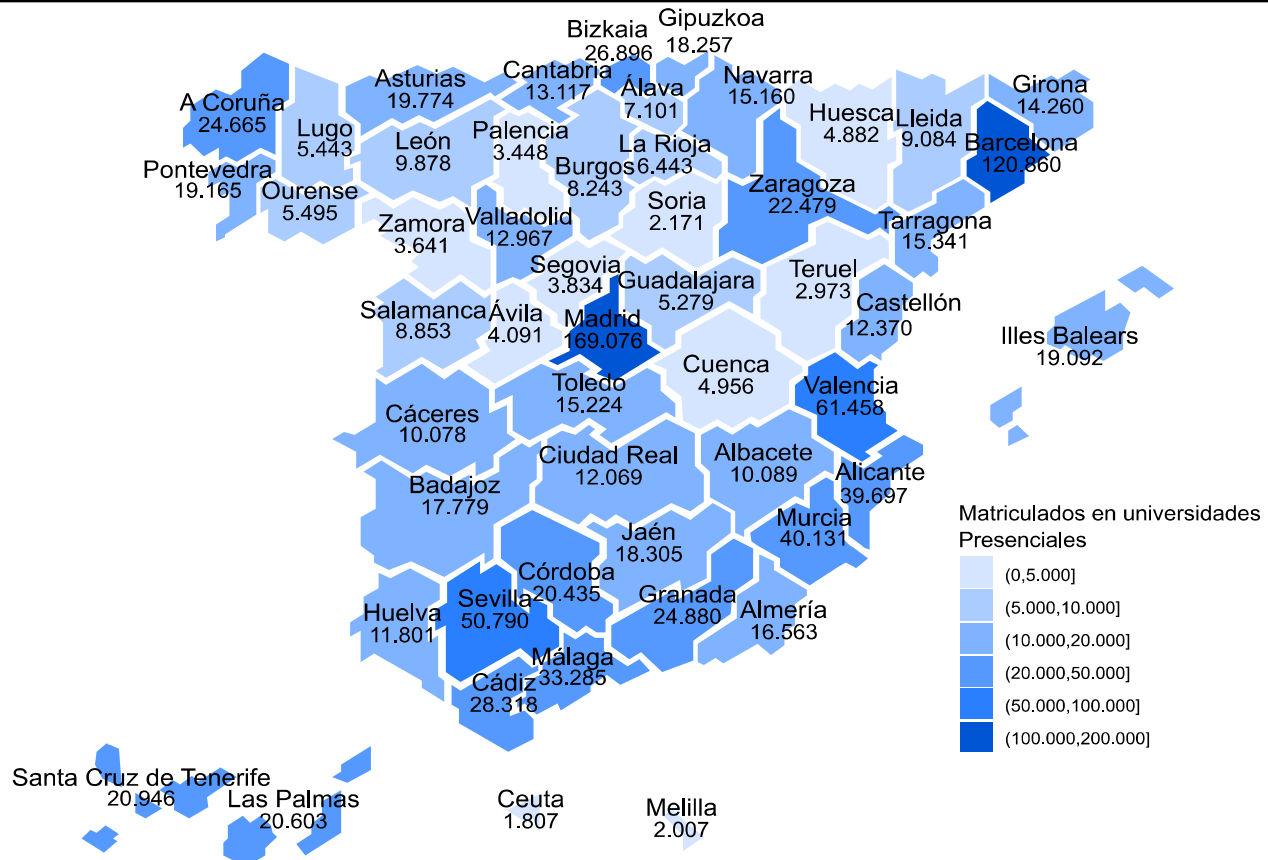

**Tabla 4.1.3** Movilidad nacional de los estudiantes universitarios matriculados en Grado y Ciclos en universidades presenciales que han cambiado de comunidad autónoma o de provincia para realizar sus estudios. Curso 2019-2020

|                                                    | Estudiantes matriculados | Tasa de movilidad nacional (cambio de CCAA) | Tasa de movilidad nacional (cambio de provincia) |
|----------------------------------------------------|--------------------------|---------------------------------------------|--------------------------------------------------|
| <b>Comunidad autónoma del centro universitario</b> |                          |                                             |                                                  |
| <b>Total</b>                                       | <b>1.105.178</b>         | <b>17,5%</b>                                | <b>30,4%</b>                                     |
| Andalucía                                          | 201.588                  | 8,4%                                        | 31,7%                                            |
| Aragón                                             | 29.056                   | 17,3%                                       | 34,3%                                            |
| Asturias (Principado de)                           | 17.381                   | 9,7%                                        | 9,7%                                             |
| Balears (Illes)                                    | 12.066                   | 3,6%                                        | 14,4%                                            |
| Canarias                                           | 33.980                   | 2,7%                                        | 14,5%                                            |
| Cantabria                                          | 10.362                   | 15,6%                                       | 16,2%                                            |
| Castilla - La Mancha                               | 25.514                   | 19,8%                                       | 37,7%                                            |
| Castilla y León                                    | 64.938                   | 31,7%                                       | 45,8%                                            |
| Cataluña                                           | 174.165                  | 10,5%                                       | 22,9%                                            |
| Comunitat Valenciana                               | 120.275                  | 14,4%                                       | 27,4%                                            |
| Extremadura                                        | 17.165                   | 10,1%                                       | 36,4%                                            |
| Galicia                                            | 49.803                   | 6,2%                                        | 38,8%                                            |
| Madrid (Comunidad de)                              | 234.923                  | 30,3%                                       | 31,3%                                            |
| Murcia (Región de)                                 | 42.731                   | 21,5%                                       | 21,6%                                            |
| Navarra (Comunidad Foral de)                       | 14.940                   | 31,2%                                       | 38,6%                                            |
| País Vasco                                         | 49.835                   | 11,8%                                       | 35,1%                                            |
| Rioja (La)                                         | 3.526                    | 30,5%                                       | 30,5%                                            |
| Ceuta                                              | 1.298                    | 40,2%                                       | 40,2%                                            |
| Melilla                                            | 1.632                    | 38,9%                                       | 39,0%                                            |

## 4.2 Estudiantes de Grado. Acceso a univ. públicas presenciales

**Tabla 4.2.1** Indicadores de admisión al Grado en universidades públicas presenciales por rama de enseñanza. Curso 2020-2021

|                               | Grados ofertados | Oferta <sup>(1)(2)</sup> | Demanda <sup>(1)</sup> | Matrícula <sup>(1)</sup> | Indicadores de admisión <sup>(1)</sup> |               |              |
|-------------------------------|------------------|--------------------------|------------------------|--------------------------|----------------------------------------|---------------|--------------|
|                               |                  |                          |                        |                          | Ocupación                              | Preferencia   | Adecuación   |
| <b>Total</b>                  | <b>2.558</b>     | <b>244.793</b>           | <b>450.650</b>         | <b>224.536</b>           | <b>91,7%</b>                           | <b>184,1%</b> | <b>69,0%</b> |
| <b>Rama de enseñanza</b>      |                  |                          |                        |                          |                                        |               |              |
| Ciencias Sociales y Jurídicas | 912              | 111.297                  | 161.266                | 103.040                  | 92,6%                                  | 144,9%        | 69,0%        |
| Ingeniería y Arquitectura     | 717              | 53.331                   | 63.766                 | 45.043                   | 84,5%                                  | 119,6%        | 70,2%        |
| Artes y Humanidades           | 390              | 27.778                   | 34.836                 | 25.019                   | 90,1%                                  | 125,4%        | 82,7%        |
| Ciencias de la Salud          | 276              | 34.862                   | 158.358                | 34.530                   | 99,0%                                  | 454,2%        | 61,6%        |
| Ciencias                      | 263              | 17.525                   | 32.424                 | 16.904                   | 96,5%                                  | 185,0%        | 60,9%        |

**Gráfico 4.2.2** Evolución de las plazas ofertadas y matrícula de nuevo ingreso en Grado en universidades públicas presenciales<sup>(1)</sup>

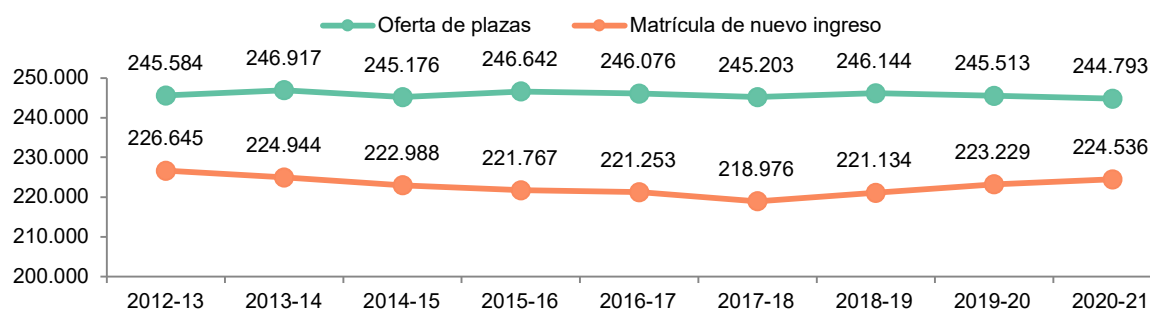

**Gráfico 4.2.3** Tasas de variación de las plazas ofertadas y la matrícula de nuevo ingreso en Grado por rama de enseñanza. Curso 2020-2021 / 2010-2011

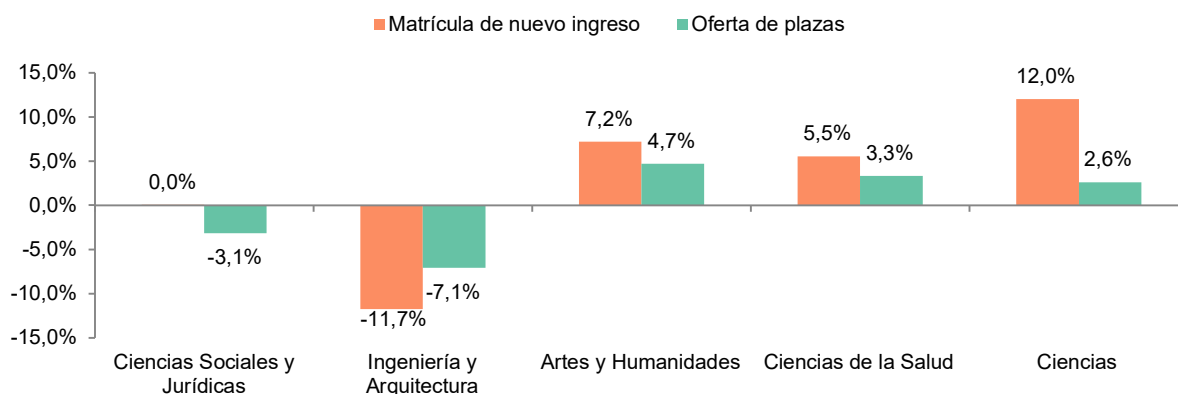

**Tabla 4.2.4** Distribución del número de titulaciones de Grado según el número de estudiantes matriculados de nuevo ingreso en universidades públicas presenciales por rama de enseñanza. Curso 2020-2021

|                               | Número de estudiantes |             |             |              |              |              |              |
|-------------------------------|-----------------------|-------------|-------------|--------------|--------------|--------------|--------------|
|                               | De 1 a 10             | De 11 a 20  | De 21 a 30  | De 31 a 50   | De 51 a 75   | De 76 a 100  | Más de 100   |
| <b>Total</b>                  | <b>6,6%</b>           | <b>9,8%</b> | <b>8,4%</b> | <b>15,5%</b> | <b>20,6%</b> | <b>11,9%</b> | <b>27,2%</b> |
| <b>Rama de enseñanza</b>      |                       |             |             |              |              |              |              |
| Ciencias Sociales y Jurídicas | 3,9%                  | 7,8%        | 7,6%        | 12,2%        | 17,8%        | 12,0%        | 38,6%        |
| Ingeniería y Arquitectura     | 11,5%                 | 11,8%       | 10,3%       | 19,0%        | 21,3%        | 10,9%        | 15,2%        |
| Artes y Humanidades           | 7,9%                  | 14,2%       | 10,4%       | 16,8%        | 20,9%        | 9,9%         | 19,8%        |
| Ciencias de la Salud          | 1,8%                  | 2,9%        | 4,7%        | 9,0%         | 23,5%        | 13,4%        | 44,8%        |
| Ciencias                      | 5,1%                  | 11,4%       | 7,0%        | 22,0%        | 24,5%        | 15,8%        | 14,3%        |

(1) Consultar definición de los indicadores en la página inicial del capítulo.

(2) En las titulaciones sin límite de plazas se ha computado la oferta en primer año que figura en la memoria de verificación del título.

(3) En las titulaciones sin límite de plazas donde no existe proceso de preinscripción, se han contabilizado como matriculados por preinscripción a todos los estudiantes matriculados y como preinscritos en primera opción a todos los estudiantes matriculados que no acceden ni por traslado de expediente ni de cursos de adaptación

## 4.2 Estudiantes de Grado. Acceso a univ. públicas presenciales

**Tabla 4.2.5** Indicadores de admisión a titulaciones de Grado en universidades públicas presenciales por comunidad autónoma. Curso 2020-2021

|                                    | Grados ofertados | Oferta de plazas (1) | Demanda        | Matrícula      | Indicadores de admisión |               |              |
|------------------------------------|------------------|----------------------|----------------|----------------|-------------------------|---------------|--------------|
|                                    |                  |                      |                |                | Ocupación               | Preferencia   | Adecuación   |
| <b>TOTAL</b>                       | <b>2.558</b>     | <b>244.793</b>       | <b>450.650</b> | <b>224.536</b> | <b>91,7%</b>            | <b>184,1%</b> | <b>69,0%</b> |
| Andalucía                          | 486              | 50.712               | 82.441         | 46.836         | 92,4%                   | 162,6%        | 64,2%        |
| Aragón                             | 58               | 6.517                | 16.861         | 5.952          | 91,3%                   | 258,7%        | 73,6%        |
| Asturias (Ppdo. de) <sup>(2)</sup> | 55               | 5.353                | 11.510         | 4.273          | 79,8%                   | 215,0%        | 74,3%        |
| Balears (Illes)                    | 39               | 3.420                | 7.525          | 3.272          | 95,7%                   | 220,0%        | 80,3%        |
| Canarias                           | 87               | 10.389               | 20.809         | 8.653          | 83,3%                   | 200,3%        | 74,2%        |
| Cantabria                          | 35               | 2.353                | 7.898          | 1.960          | 83,3%                   | 335,7%        | 74,9%        |
| Castilla-La Mancha                 | 59               | 6.212                | 17.620         | 5.589          | 90,0%                   | 283,6%        | 81,0%        |
| Castilla y León                    | 230              | 16.045               | 35.314         | 13.209         | 82,3%                   | 220,1%        | 74,5%        |
| Cataluña                           | 435              | 37.908               | 57.162         | 37.583         | 99,1%                   | 150,8%        | 85,8%        |
| Comunitat Valenciana               | 218              | 25.503               | 40.830         | 23.814         | 93,4%                   | 160,1%        | 63,0%        |
| Extremadura                        | 73               | 5.259                | 10.611         | 3.776          | 71,8%                   | 201,8%        | 78,1%        |
| Galicia                            | 151              | 11.424               | 22.782         | 11.563         | 101,2%                  | 199,4%        | 66,2%        |
| Madrid (Comunidad de)              | 431              | 44.164               | 68.153         | 39.807         | 90,1%                   | 154,3%        | 52,6%        |
| Murcia (Región de)                 | 75               | 7.986                | 20.851         | 7.156          | 89,6%                   | 261,1%        | 75,4%        |
| Navarra (C. Foral de)              | 31               | 2.020                | 8.191          | 1.988          | 98,4%                   | 405,5%        | 71,3%        |
| País Vasco                         | 78               | 8.528                | 17.975         | 8.148          | 95,5%                   | 210,8%        | 74,1%        |
| Rioja (La)                         | 19               | 1.000                | 4.117          | 957            | 95,7%                   | 411,7%        | 89,8%        |

(1) En las titulaciones sin límite de plazas se ha computado la oferta en primer año que figura en la memoria de verificación del título.

(2) En las titulaciones sin límite de plazas donde no existe proceso de preinscripción, se han contabilizado como matriculados por preinscripción a todos los estudiantes matriculados y como preinscritos en primera opción a todos los estudiantes matriculados que no acceden ni por traslado de expediente ni de cursos de adaptación

## 4.2 Estudiantes de Grado. Acceso a univ. públicas presenciales

**Tabla 4.2.6** Promedio de las notas de corte de titulaciones de Grado en centros propios de universidades públicas presenciales por ámbito de estudio

|                                                                   | 2016-2017   | 2017-2018   | 2018-2019   | 2019-2020   | 2020-2021    |
|-------------------------------------------------------------------|-------------|-------------|-------------|-------------|--------------|
| <b>Ámbito de estudio</b>                                          |             |             |             |             |              |
| <b>Total Educación</b>                                            | <b>6,48</b> | <b>6,62</b> | <b>6,77</b> | <b>6,88</b> | <b>7,57</b>  |
| Formación de docentes de enseñanza infantil                       | 6,53        | 6,58        | 6,66        | 6,82        | 7,44         |
| Formación de docentes de enseñanza primaria                       | 6,48        | 6,58        | 6,79        | 6,94        | 7,68         |
| Otra Formación de personal docente y ciencias de la educación     | 6,43        | 6,68        | 6,87        | 6,89        | 7,60         |
| <b>Total Artes y humanidades</b>                                  | <b>6,58</b> | <b>6,68</b> | <b>6,71</b> | <b>6,87</b> | <b>7,14</b>  |
| Técnicas audiovisuales y medios de comunicación                   | 8,89        | 8,93        | 9,24        | 9,07        | 9,58         |
| Artes                                                             | 6,34        | 6,59        | 6,43        | 6,80        | 7,16         |
| Lenguas                                                           | 5,81        | 5,89        | 5,77        | 6,05        | 6,03         |
| Humanidades                                                       | 5,28        | 5,33        | 5,42        | 5,58        | 5,79         |
| <b>Total Ciencias sociales, periodismo y documentación</b>        | <b>7,21</b> | <b>7,34</b> | <b>7,48</b> | <b>7,53</b> | <b>8,19</b>  |
| Psicología                                                        | 8,13        | 8,18        | 8,28        | 8,30        | 9,61         |
| Economía                                                          | 6,31        | 6,39        | 6,78        | 6,70        | 7,42         |
| Otras Ciencias sociales y del comportamiento                      | 7,24        | 7,38        | 7,54        | 7,68        | 8,17         |
| Periodismo e información                                          | 7,15        | 7,42        | 7,31        | 7,42        | 7,58         |
| <b>Total Negocios, administración y derecho</b>                   | <b>6,28</b> | <b>6,43</b> | <b>6,53</b> | <b>6,61</b> | <b>7,09</b>  |
| Administración y gestión de empresas                              | 5,69        | 5,84        | 5,94        | 6,16        | 6,37         |
| Otra Educación comercial y empresarial                            | 6,60        | 6,78        | 6,86        | 7,02        | 7,57         |
| Derecho                                                           | 6,56        | 6,67        | 6,78        | 6,65        | 7,33         |
| <b>Total Ciencias</b>                                             | <b>7,73</b> | <b>8,27</b> | <b>8,54</b> | <b>8,92</b> | <b>9,57</b>  |
| Ciencias de la vida                                               | 8,97        | 9,05        | 9,15        | 9,13        | 9,74         |
| Ciencias Físicas, químicas, geológicas                            | 6,62        | 6,90        | 7,16        | 7,32        | 7,84         |
| Matemáticas y Estadística                                         | 7,60        | 8,85        | 9,32        | 10,31       | 11,13        |
| <b>Total Informática</b>                                          | <b>6,53</b> | <b>7,12</b> | <b>7,36</b> | <b>7,50</b> | <b>8,44</b>  |
| Informática                                                       | 6,53        | 7,12        | 7,36        | 7,50        | 8,44         |
| <b>Total Ingeniería, industria y construcción</b>                 | <b>5,77</b> | <b>5,90</b> | <b>6,00</b> | <b>5,97</b> | <b>6,36</b>  |
| Ingenierías                                                       | 6,20        | 6,33        | 6,47        | 6,44        | 6,86         |
| Arquitectura y construcción                                       | 5,34        | 5,47        | 5,53        | 5,51        | 5,86         |
| <b>Total Agricultura, ganadería, silv. , pesca, y veterinaria</b> | <b>8,08</b> | <b>7,99</b> | <b>7,98</b> | <b>8,05</b> | <b>8,29</b>  |
| Agricultura, ganadería y pesca                                    | 5,10        | 5,15        | 5,20        | 5,16        | 5,19         |
| Veterinaria                                                       | 11,05       | 10,83       | 10,77       | 10,93       | 11,38        |
| <b>Total Salud y servicios sociales</b>                           | <b>9,41</b> | <b>9,36</b> | <b>9,45</b> | <b>9,59</b> | <b>10,26</b> |
| Medicina                                                          | 12,50       | 12,49       | 12,48       | 12,60       | 12,94        |
| Enfermería y atención a enfermos                                  | 9,92        | 9,80        | 9,99        | 10,31       | 11,12        |
| Otras ciencias de la Salud                                        | 9,20        | 9,13        | 9,12        | 9,19        | 10,00        |
| Trabajo social y orientación                                      | 6,02        | 6,02        | 6,19        | 6,24        | 6,96         |
| <b>Total Servicios</b>                                            | <b>6,88</b> | <b>7,17</b> | <b>7,30</b> | <b>7,34</b> | <b>7,66</b>  |
| Deportes                                                          | 9,29        | 9,51        | 9,66        | 9,55        | 10,18        |
| Turismo y Hostelería                                              | 5,63        | 5,70        | 5,70        | 5,76        | 5,78         |
| Otros Servicios                                                   | 5,74        | 6,31        | 6,53        | 6,70        | 7,02         |

## 4.2 Estudiantes de Grado. Acceso a univ. públicas presenciales

**Gráfico 4.2.7** Distribución del número de titulaciones de Grado según su nota de corte en universidades públicas presenciales por rama de enseñanza. Curso 2020-2021

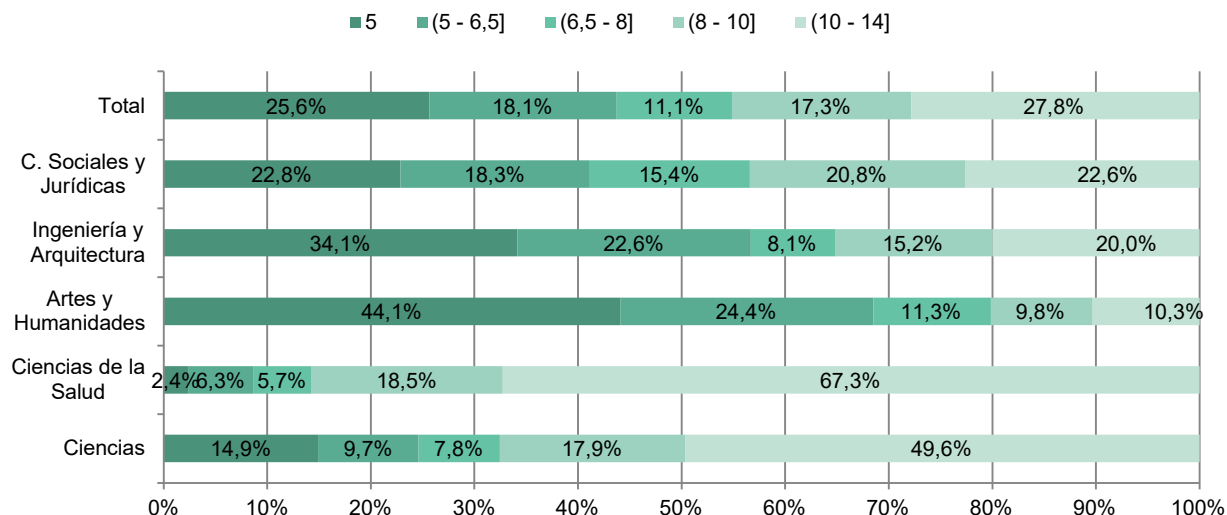

**Gráfico 4.2.8** Distribución del número de estudiantes de nuevo ingreso en titulaciones de Grado en universidades públicas presenciales según la forma de admisión y sexo. Curso 2020-2021

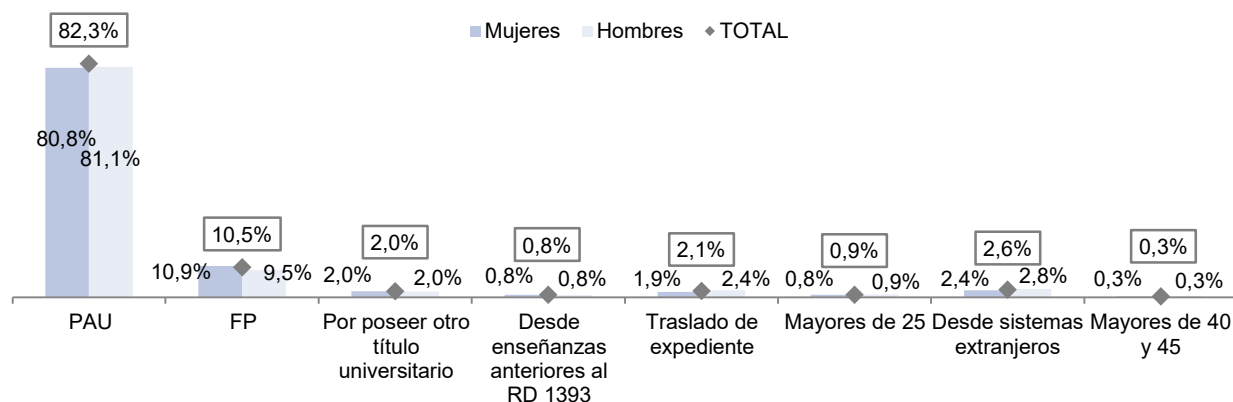

**Gráfico 4.2.9** Distribución del número de estudiantes que acceden a titulaciones de Grado por PAU y FP en universidades públicas presenciales por tramo de la nota de admisión y rama de enseñanza. Curso 2020-2021

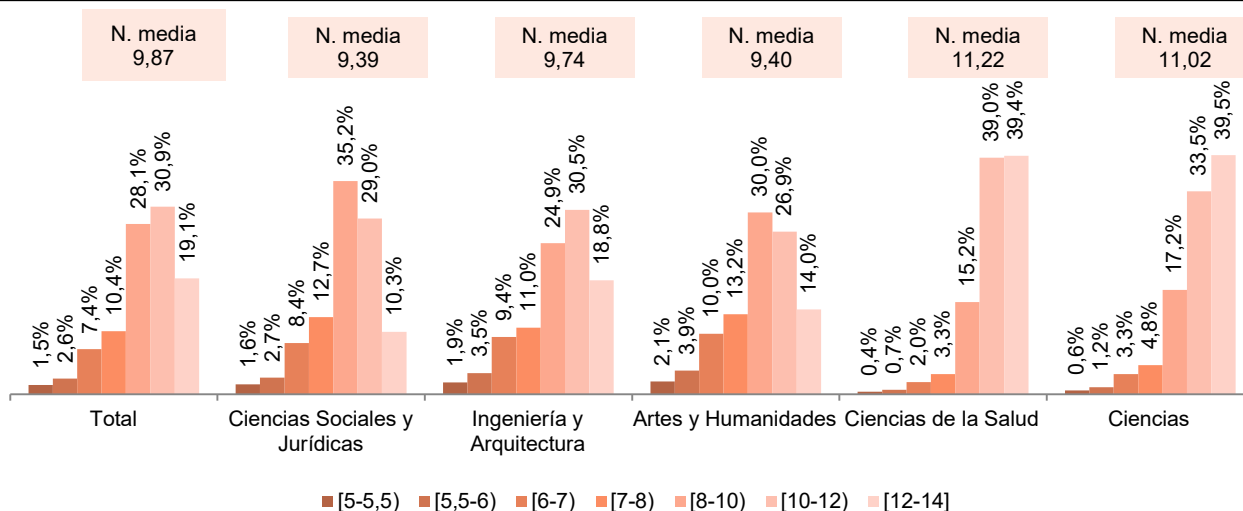

## 4.2 Estudiantes de Grado. Acceso a univ. públicas presenciales

**Gráfico 4.2.10** Notas de admisión a titulaciones de Grado de los estudiantes de nuevo ingreso en universidades públicas presenciales por forma de admisión y ámbito de estudio. Curso 2020-2021

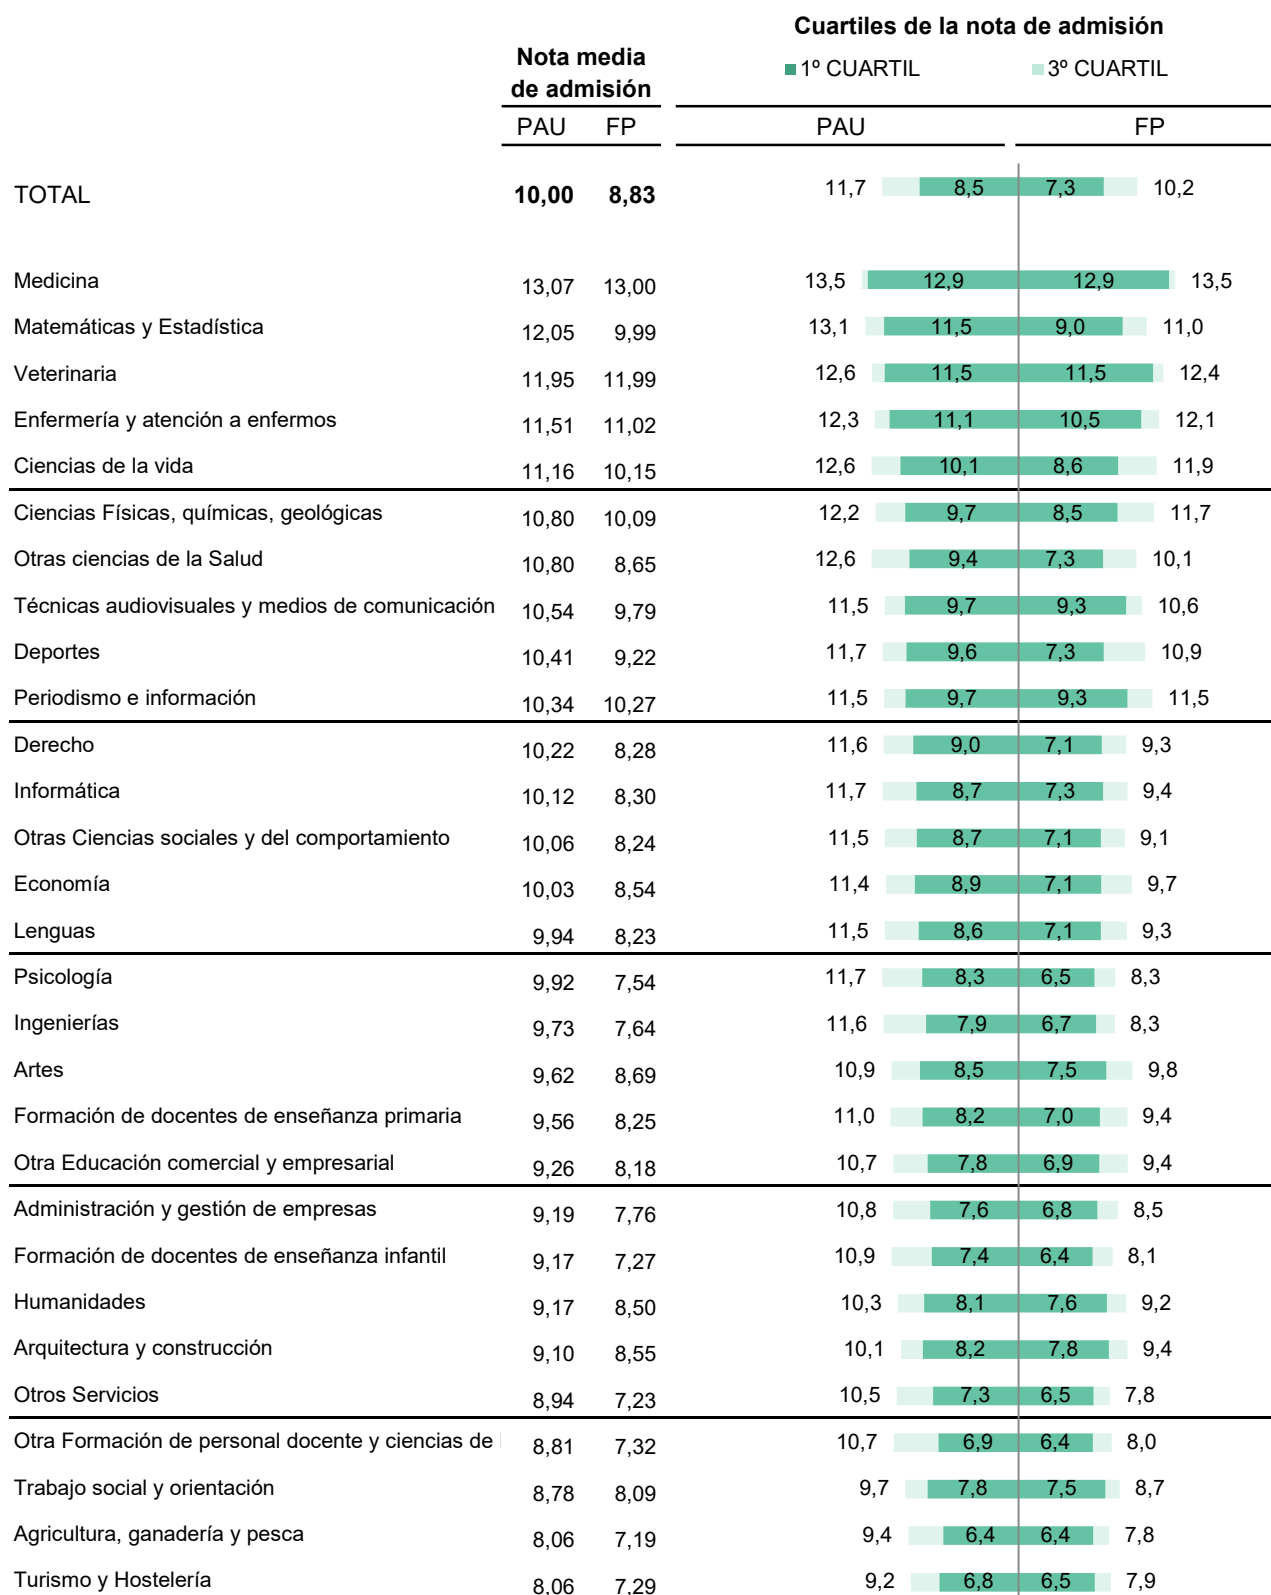

Primer cuartil: Es la nota de admisión bajo la que se encuentra el 25% de los estudiantes de nuevo ingreso

Tercer cuartil: Es la nota de admisión bajo la que se encuentra el 75% de los estudiantes de nuevo ingreso

Nota media: Es la media aritmética de las notas de admisión de los estudiantes de nuevo ingreso

## 4.3 Estudiantes de Grado. Matriculados

**Tabla 4.3.1** Evolución del número de estudiantes matriculados en Grado y 1<sup>er</sup> y 2<sup>o</sup> Ciclo por rama de enseñanza

|                                        | Curso académico  |                  |                  |                        |                  |                | Tasa de variación |             |              |
|----------------------------------------|------------------|------------------|------------------|------------------------|------------------|----------------|-------------------|-------------|--------------|
|                                        | 2005-06          | 2015-16          | 2019-20          | 2020-21 <sup>(1)</sup> |                  |                | Anual             | 5 años      | 15 años      |
|                                        |                  |                  |                  | Total                  | Univ. públicas   | Univ. privadas |                   |             |              |
| <b>Total</b>                           | <b>1.442.453</b> | <b>1.321.698</b> | <b>1.296.379</b> | <b>1.340.632</b>       | <b>1.110.491</b> | <b>230.141</b> | <b>3,4%</b>       | <b>1,4%</b> | <b>-7,1%</b> |
| <b>Rama de enseñanza<sup>(2)</sup></b> |                  |                  |                  |                        |                  |                |                   |             |              |
| Ciencias Sociales y Jurídicas          | 713.627          | 614.614          | 602.896          | 621.235                | 500.370          | 120.865        | 3,0%              | 1,1%        | -12,9%       |
| Ingeniería y Arquitectura              | 377.858          | 256.570          | 228.638          | 233.365                | 210.379          | 22.986         | 2,1%              | -9,0%       | -38,2%       |
| Artes y Humanidades                    | 132.461          | 130.911          | 133.301          | 142.473                | 128.329          | 14.144         | 6,9%              | 8,8%        | 7,6%         |
| Ciencias de la Salud                   | 117.563          | 239.356          | 248.484          | 257.905                | 188.553          | 69.352         | 3,8%              | 7,7%        | 119,4%       |
| Ciencias                               | 100.944          | 80.247           | 83.060           | 85.654                 | 82.860           | 2.794          | 3,1%              | 6,7%        | -15,1%       |

**Gráfico 4.3.2** Evolución del número de estudiantes matriculados en Grado y 1<sup>er</sup> y 2<sup>o</sup> Ciclo.

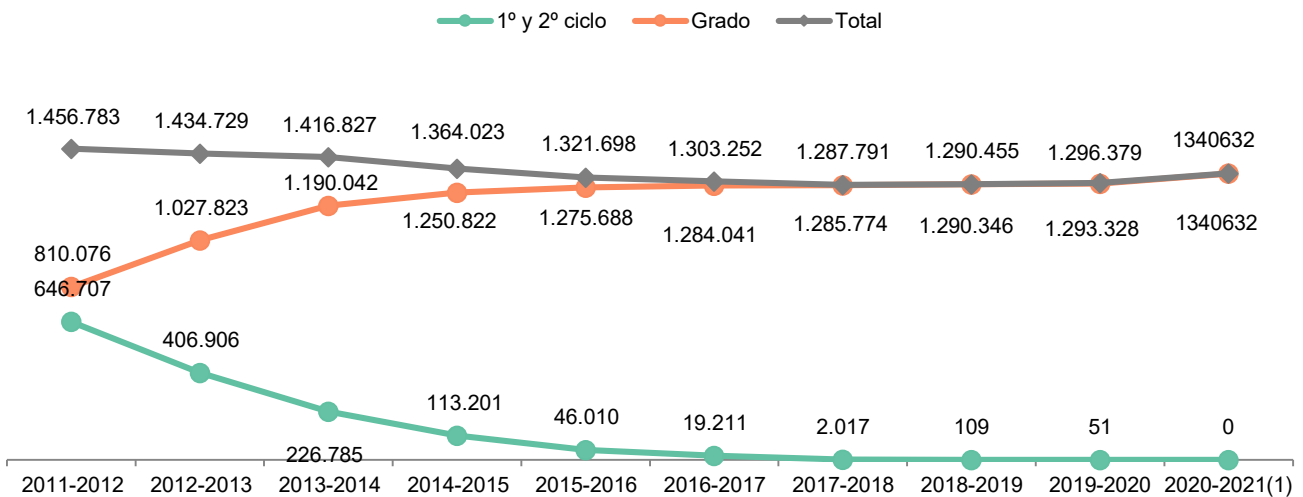

**Gráfico 4.3.3** Evolución en la distribución del número de estudiantes matriculados en Grado y 1<sup>er</sup> y 2<sup>o</sup> Ciclo en cada rama de enseñanza en los 10 últimos años. Cursos 2010-2011 y 2020-2021<sup>(1)</sup>

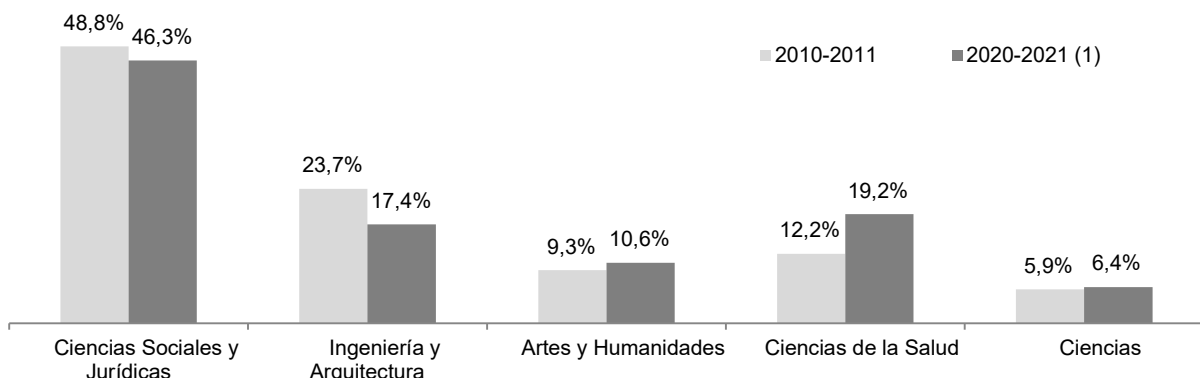

(1) Datos provisionales

(2) Se ha adaptado la denominación de las ramas de enseñanzas de 1<sup>er</sup> y 2<sup>o</sup> Ciclo a las de Grado



## 4.3 Estudiantes de Grado. Egresados

**Tabla 4.3.5** Evolución del número de estudiantes egresados en Grado y 1<sup>er</sup> y 2<sup>o</sup> Ciclo por rama de enseñanza

|                                        | Curso académico |                |                |                  |                   |                   | Tasa variación |                                |                                 |
|----------------------------------------|-----------------|----------------|----------------|------------------|-------------------|-------------------|----------------|--------------------------------|---------------------------------|
|                                        | 2004-05         | 2014-15        | 2018-19        | 2019-20<br>Total | 2019-20           |                   | Anual          | 5 años<br>2019-20 /<br>2014-15 | 15 años<br>2019-20 /<br>2004-05 |
|                                        |                 |                |                |                  | Univ.<br>públicas | Univ.<br>privadas |                |                                |                                 |
| <b>Total</b>                           | <b>193.337</b>  | <b>223.596</b> | <b>189.438</b> | <b>208.345</b>   | <b>172.123</b>    | <b>36.222</b>     | <b>10,0%</b>   | <b>-6,8%</b>                   | <b>7,8%</b>                     |
| <b>Rama de enseñanza<sup>(1)</sup></b> |                 |                |                |                  |                   |                   |                |                                |                                 |
| Ciencias Sociales y Jurídicas          | 98.423          | 108.318        | 92.036         | 104.424          | 83.452            | 20.972            | 13,5%          | -3,6%                          | 6,1%                            |
| Ingeniería y Arquitectura              | 42.509          | 49.569         | 30.101         | 31.367           | 28.402            | 2.965             | 4,2%           | -36,7%                         | -26,2%                          |
| Artes y Humanidades                    | 16.256          | 17.095         | 15.983         | 17.769           | 16.404            | 1.365             | 11,2%          | 3,9%                           | 9,3%                            |
| Ciencias de la Salud                   | 22.337          | 37.002         | 39.665         | 42.085           | 31.706            | 10.379            | 6,1%           | 13,7%                          | 88,4%                           |
| Ciencias                               | 13.812          | 11.612         | 11.653         | 12.700           | 12.159            | 541               | 9,0%           | 9,4%                           | -8,1%                           |

**Gráfico 4.3.6** Evolución del número de estudiantes egresados en Grado y 1<sup>er</sup> y 2<sup>o</sup> Ciclo.

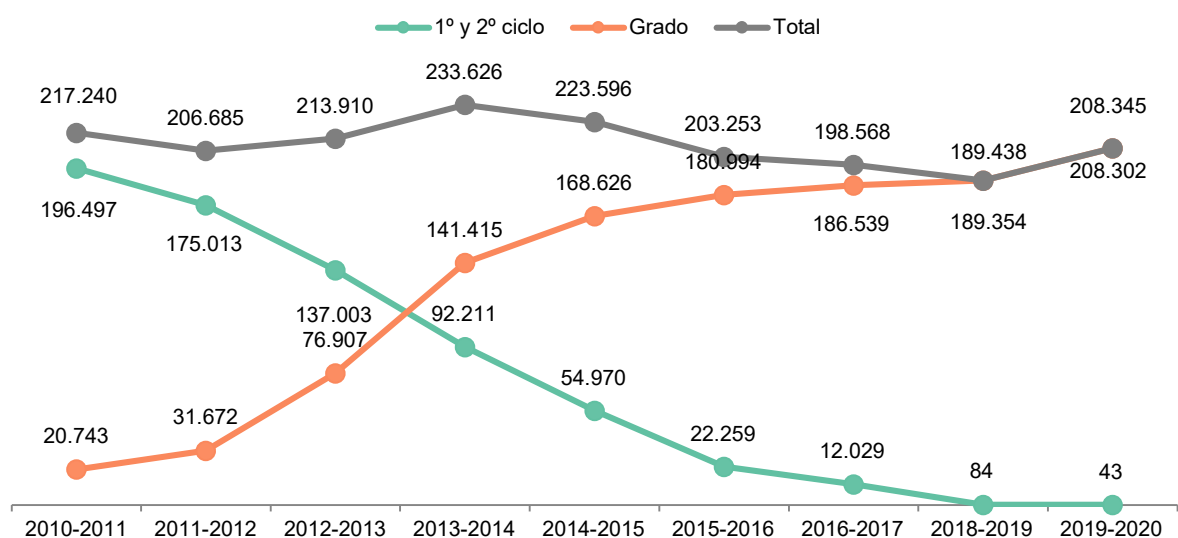

**Gráfico 4.3.7** Evolución de la distribución del número de estudiantes egresados en Grado y 1<sup>er</sup> y 2<sup>o</sup> Ciclo por rama de enseñanza en los 10 últimos años. Cursos 2009-10 y 2019-2020

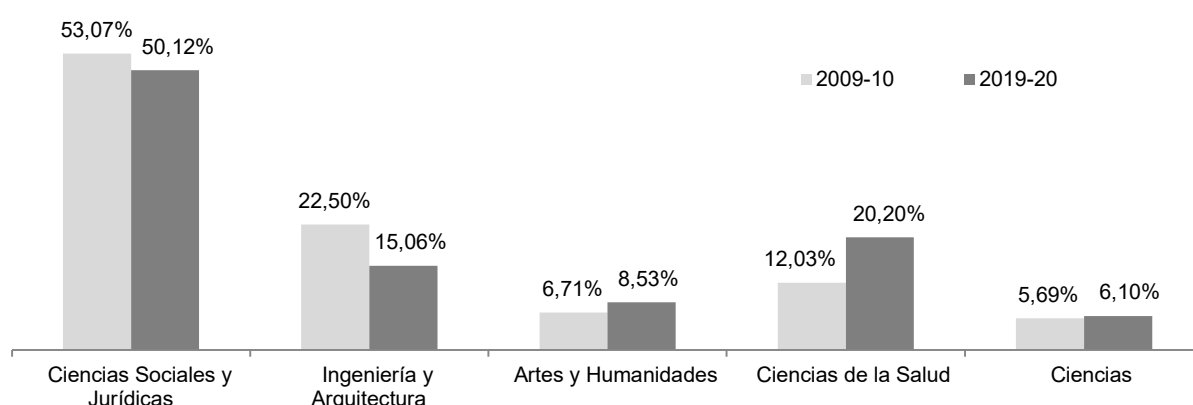

(1) Se ha adaptado la denominación de las ramas de enseñanzas de 1er y 2º Ciclo a las de Grado

## 4.4 Estudiantes de Grado. Perfil de los estudiantes

**Tabla 4.4.1** Estudiantes matriculados en Grado y 1<sup>er</sup> y 2<sup>o</sup> Ciclo por grupo de edad. Curso 2020-2021<sup>(1)</sup>

|                    | Total     | % Mujeres |
|--------------------|-----------|-----------|
| Total              | 1.340.632 | 56,0%     |
| De 18 a 21 años    | 708.988   | 58,3%     |
| De 22 a 25 años    | 324.971   | 54,2%     |
| De 26 a 30 años    | 113.035   | 53,0%     |
| Mayores de 30 años | 193.638   | 52,9%     |

**Tabla 4.4.2** Estudiantes egresados en Grado y 1<sup>er</sup> y 2<sup>o</sup> Ciclo por grupo de edad. Curso 2019-2020

|                  | Total   | % Mujeres |
|------------------|---------|-----------|
| Total            | 208.345 | 59,8%     |
| Menos de 25 años | 146.334 | 62,1%     |
| De 25 a 30 años  | 40.167  | 54,0%     |
| De 31 a 40 años  | 13.285  | 56,7%     |
| Más de 40 años   | 8.559   | 53,1%     |

**Gráfico 4.4.3** Distribución del número de estudiantes matriculados en titulaciones de Grado y 1<sup>er</sup> y 2<sup>o</sup> Ciclo por grupo de edad y rama de enseñanza. Curso 2020-2021<sup>(1)</sup>

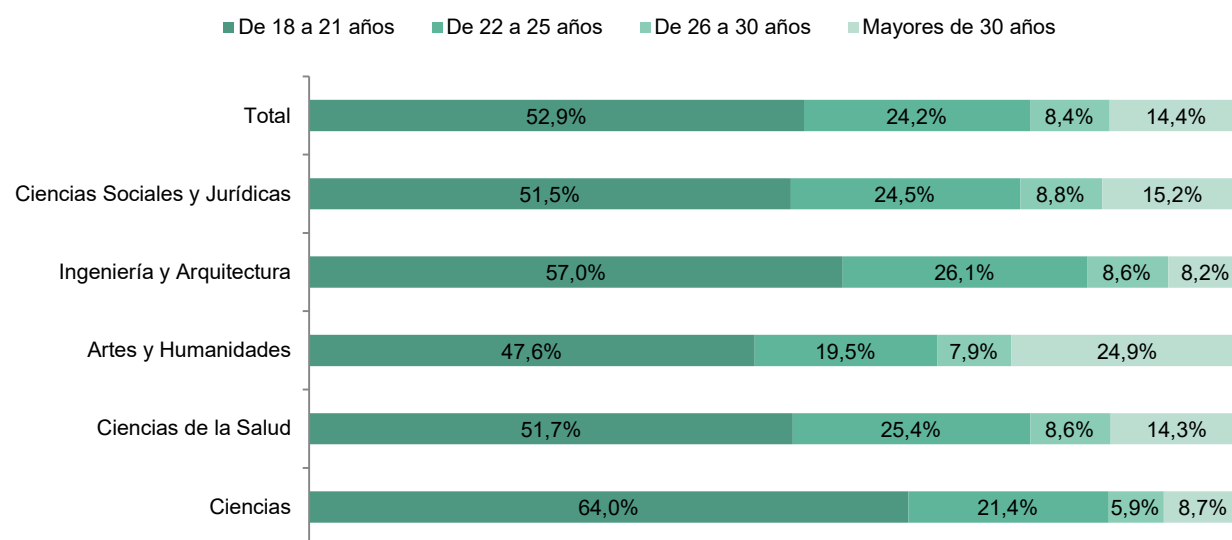

**Gráfico 4.4.4** Distribución del número de estudiantes egresados en titulaciones de Grado y 1<sup>er</sup> y 2<sup>o</sup> Ciclo por grupo de edad y rama de enseñanza. Curso 2019-2020

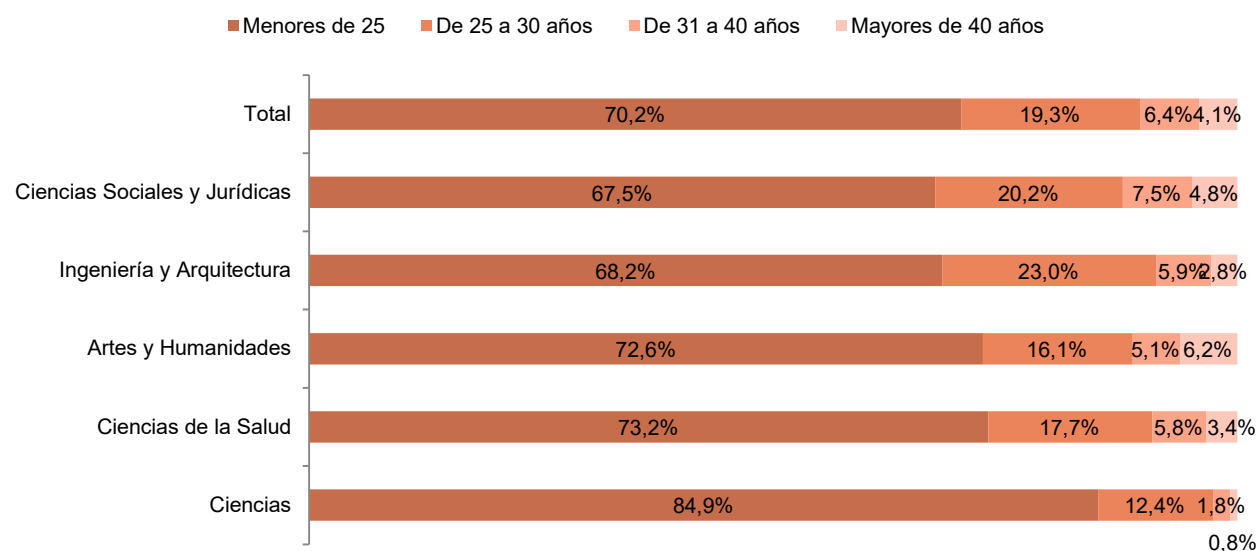

(1) Datos provisionales

## 4.4 Estudiantes de Grado. Perfil de los estudiantes

**Tabla 4.4.5** Perfil de los estudiantes en titulaciones de Grado, 1<sup>er</sup> y 2<sup>o</sup> Ciclo por ámbito de estudio y tipo de universidad. Curso 2019-2020

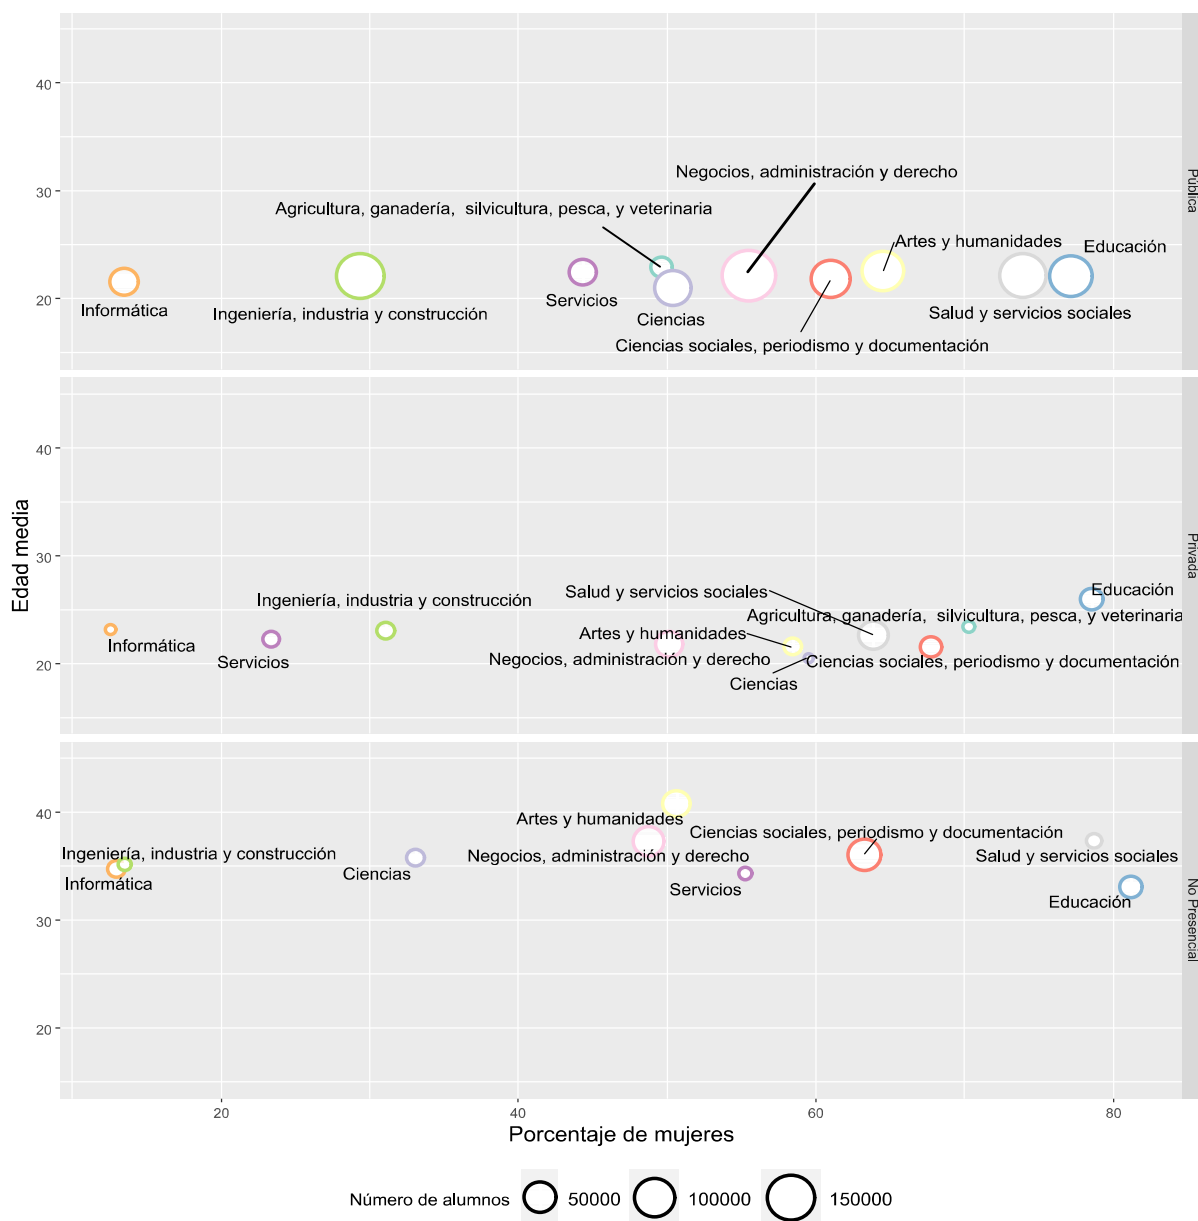



# 5 Indicadores de Grado

## TASA DE RENDIMIENTO

La tasa de rendimiento de los alumnos de Grado en el curso 2019-2020 se situó en un 84,6% teniendo su mínimo en la rama de Ingeniería y arquitectura (74,4%) y su máximo en la rama de Ciencias de la Salud (90,6%).

La tasa de Rendimiento ha crecido en el curso 2019/2020, probablemente influenciada por la pandemia.

Destacar la relación entre la nota de admisión (con la que el alumno entró al estudio) y la tasa de rendimiento. Pasa de un 71,7% en estudiantes con las notas más bajas al 95,3% para el grupo de estudiantes con notas de admisión mayores.

**En las universidades presenciales el 13,5% de los alumnos entrantes abandonaron el SUE y el 12,5% cambiaron a otro estudio dentro del SUE.**

## TASAS DE ABANDONO Y CAMBIO

En las universidades presenciales el 13,5% de los alumnos de nuevo ingreso abandonaron el Sistema Universitario Español (SUE), resultado que se obtiene de la resta del 26,0% de abandono del estudio menos el 12,5% que cambiaron a otro estudio dentro del SUE.

Las universidades no presenciales tuvieron las tasas de abandono sensiblemente más altas.

De los estudiantes de nuevo ingreso del total de universidades en el curso 2017-2018 el 21,3% abandonaron la titulación elegida el primer año, de ellos un 8,3% para cambiarse a otro estudio universitario.

El abandono del SUE tras el primer año es mayor en la rama de Artes y Humanidades y menor en Ciencias de la Salud. Influye de forma importante la nota de admisión con la que se entró al estudio. Adicionalmente se observa mayores tasas de abandono en hombres.

## TASAS DE IDONEIDAD Y GRADUACIÓN

El 38,3% de los estudiantes de nuevo ingreso finalizó sus estudios de Grado en el tiempo teórico (tasa de idoneidad), aumentando hasta el 50,2% si tenemos en cuenta un año de retraso (tasa de graduación). Dichos valores son sensiblemente inferiores en la rama de Ingeniería y Arquitectura y mayores para Ciencias de la Salud.

## ESTUDIANTES EGRESADOS

La nota media del expediente de los egresados en estudios de Grado en el curso 2019-2020 fue de 7,27. Solo el 25% de los egresados tuvo una nota inferior a 6,68 (primer cuartil).

Los alumnos que terminan los estudios de Grado de 4 años lo hacen en 4,9 años de media. En los Grados de 5 años acaban en 5,8 años.

### Nota

Los indicadores en los que se contabiliza a todos los estudiantes matriculados del curso 2019-2020 son: el número de créditos matriculados, la tasa de rendimiento, de éxito y de evaluación.

Los indicadores que se calculan respecto de la cohorte de alumnos que entraron en Grado varios cursos atrás (por ser necesario que haya transcurrido cierto número de cursos) son: la tasa de abandono del estudio, la tasa de cambio de estudio, las tasas de idoneidad y la tasa de graduación.

Los indicadores referidos a los egresados son: la nota media del expediente y la duración media.

## Referencias

[ANEXO I: Definiciones.](#)

[Estadística de Rendimiento Académico](#)

[Sistema Integrado de Información Universitaria \(SIIU\)](#)

## 5.1 Indicadores de Grado. Principales indicadores

**Tabla 5.1.1** Últimos valores disponibles de los principales indicadores académicos de los estudiantes de Grado por tipo de universidad y rama de enseñanza

|                                                                                                  |              | Total       | C. Sociales y<br>Jurídicas | Ingeniería y<br>Arquitectura | Artes y<br>Humanidades | Ciencias de<br>la Salud | Ciencias     |
|--------------------------------------------------------------------------------------------------|--------------|-------------|----------------------------|------------------------------|------------------------|-------------------------|--------------|
| <b>Nota de admisión</b> por PAU y FP <sup>(1)</sup> . Cohorte de nuevo ingreso 2019-20           | <b>Total</b> | <b>9,34</b> | <b>8,88</b>                | <b>9,20</b>                  | <b>9,08</b>            | <b>10,52</b>            | <b>10,50</b> |
|                                                                                                  | PAU          | 9,47        | 9,01                       | 9,34                         | 9,14                   | 10,65                   | 10,57        |
|                                                                                                  | FP           | 8,40        | 8,07                       | 7,37                         | 7,65                   | 9,87                    | 8,94         |
| <b>Número medio de créditos matriculados</b> 2019-20                                             | <b>Total</b> | <b>51,1</b> | <b>51,5</b>                | <b>49,7</b>                  | <b>46,7</b>            | <b>53,5</b>             | <b>52,0</b>  |
|                                                                                                  | U. públicas  | 51,5        | 52,2                       | 50,4                         | 47,1                   | 53,8                    | 52,0         |
|                                                                                                  | U. privadas  | 49,0        | 48,5                       | 43,2                         | 42,4                   | 52,7                    | 54,3         |
| <b>Número medio de créditos presentados</b> 2019-20                                              | <b>Total</b> | <b>47,0</b> | <b>47,8</b>                | <b>43,7</b>                  | <b>41,3</b>            | <b>51,1</b>             | <b>47,5</b>  |
|                                                                                                  | U. públicas  | 47,2        | 48,3                       | 44,2                         | 41,5                   | 51,1                    | 47,3         |
|                                                                                                  | U. privadas  | 46,5        | 46,0                       | 38,9                         | 39,3                   | 51,0                    | 52,2         |
| <b>Número medio de créditos aprobados</b> 2019-20                                                | <b>Total</b> | <b>43,2</b> | <b>44,5</b>                | <b>37,0</b>                  | <b>38,5</b>            | <b>48,5</b>             | <b>42,7</b>  |
|                                                                                                  | U. públicas  | 43,1        | 44,6                       | 37,2                         | 38,6                   | 48,7                    | 42,5         |
|                                                                                                  | U. privadas  | 43,9        | 44,1                       | 34,9                         | 37,2                   | 47,9                    | 47,4         |
| <b>Tasa de rendimiento</b> 2019-20 (%)                                                           | <b>Total</b> | <b>84,6</b> | <b>86,5</b>                | <b>74,4</b>                  | <b>82,5</b>            | <b>90,6</b>             | <b>82,0</b>  |
|                                                                                                  | U. públicas  | 83,6        | 85,5                       | 73,9                         | 82,0                   | 90,5                    | 81,8         |
|                                                                                                  | U. privadas  | 89,7        | 90,8                       | 80,8                         | 87,6                   | 90,8                    | 87,4         |
| <b>Abandono del estudio en 1º año.</b> Cohorte de nuevo ingreso 2017-18 (%)                      | <b>Total</b> | <b>21,3</b> | <b>20,3</b>                | <b>25,0</b>                  | <b>27,5</b>            | <b>16,6</b>             | <b>21,7</b>  |
|                                                                                                  | U. públicas  | 21,7        | 20,8                       | 25,1                         | 27,0                   | 16,7                    | 21,6         |
|                                                                                                  | U. privadas  | 19,3        | 18,3                       | 24,5                         | 31,3                   | 16,4                    | 23,3         |
| <b>Cambio de estudio en 1º año.</b> Cohorte de nuevo ingreso 2017-18 (%)                         | <b>Total</b> | <b>8,3</b>  | <b>7,3</b>                 | <b>11,1</b>                  | <b>9,1</b>             | <b>7,0</b>              | <b>11,3</b>  |
|                                                                                                  | U. públicas  | 8,8         | 7,9                        | 11,6                         | 9,1                    | 7,1                     | 11,3         |
|                                                                                                  | U. privadas  | 6,2         | 5,2                        | 7,4                          | 9,6                    | 6,7                     | 12,6         |
| <b>Tasa de idoneidad.</b> Cohorte de nuevo ingreso 2016-17 (%)                                   | <b>Total</b> | <b>38,3</b> | <b>42,0</b>                | <b>17,2</b>                  | <b>33,0</b>            | <b>59,2</b>             | <b>31,4</b>  |
|                                                                                                  | U. públicas  | 37,0        | 41,1                       | 16,4                         | 32,5                   | 60,3                    | 30,9         |
|                                                                                                  | U. privadas  | 49,7        | 49,2                       | 35,5                         | 42,5                   | 55,4                    | 44,1         |
| <b>Tasa de graduación.</b> Cohorte de nuevo ingreso 2015-16 (%)                                  | <b>Total</b> | <b>51,8</b> | <b>54,7</b>                | <b>32,9</b>                  | <b>47,1</b>            | <b>70,3</b>             | <b>49,6</b>  |
|                                                                                                  | U. públicas  | 50,6        | 53,9                       | 31,9                         | 46,6                   | 70,6                    | 49,5         |
|                                                                                                  | U. privadas  | 63,4        | 62,1                       | 56,7                         | 56,6                   | 69,1                    | 53,9         |
| <b>Tasa de eficiencia.</b> Cohorte de egresados 2019-20 (%)                                      | <b>Total</b> | <b>88,9</b> | <b>89,8</b>                | <b>81,9</b>                  | <b>90,1</b>            | <b>92,3</b>             | <b>86,0</b>  |
|                                                                                                  | U. públicas  | 88,3        | 89,1                       | 81,5                         | 89,7                   | 92,3                    | 85,7         |
|                                                                                                  | U. privadas  | 93,3        | 94,4                       | 89,1                         | 96,1                   | 92,4                    | 91,9         |
| <b>Duración media de estudios de Grado.</b> Cohorte de egresados 2019-20 (años) Grados de 4 años | <b>Total</b> | <b>4,9</b>  | <b>4,9</b>                 | <b>5,5</b>                   | <b>5,0</b>             | <b>4,5</b>              | <b>5,0</b>   |
|                                                                                                  | U. públicas  | 5,0         | 4,9                        | 5,6                          | 5,0                    | 4,5                     | 5,0          |
|                                                                                                  | U. privadas  | 4,6         | 4,7                        | 4,7                          | 4,8                    | 4,5                     | 4,6          |
| <b>Nota media del expediente</b> cohorte de egresados 2019-20                                    | <b>Total</b> | <b>7,27</b> | <b>7,29</b>                | <b>6,86</b>                  | <b>7,44</b>            | <b>7,49</b>             | <b>7,13</b>  |
|                                                                                                  | U. públicas  | 7,24        | 7,24                       | 6,85                         | 7,43                   | 7,54                    | 7,12         |
|                                                                                                  | U. privadas  | 7,39        | 7,48                       | 7,01                         | 7,58                   | 7,32                    | 7,28         |

(1) Para el cálculo de este indicador sólo se tienen en cuenta universidades públicas presenciales.

## 5.1 Indicadores de Grado. Principales indicadores

**Gráfico 5.1.2** Evolución del número medio de créditos matriculados, presentados y superados en Grado

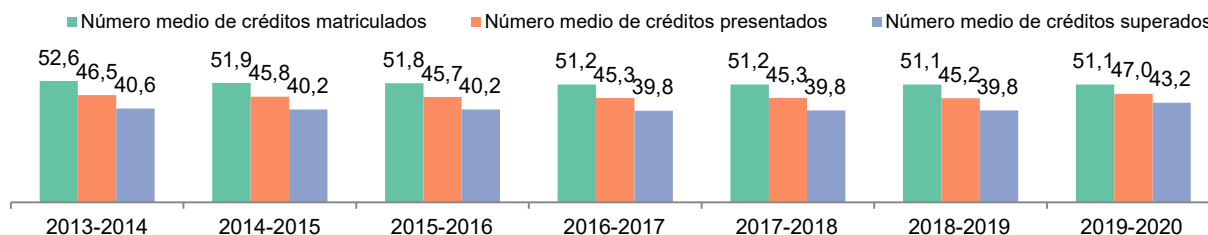

**Gráfico 5.1.3** Evolución de la tasa de rendimiento en Grado por rama de enseñanza

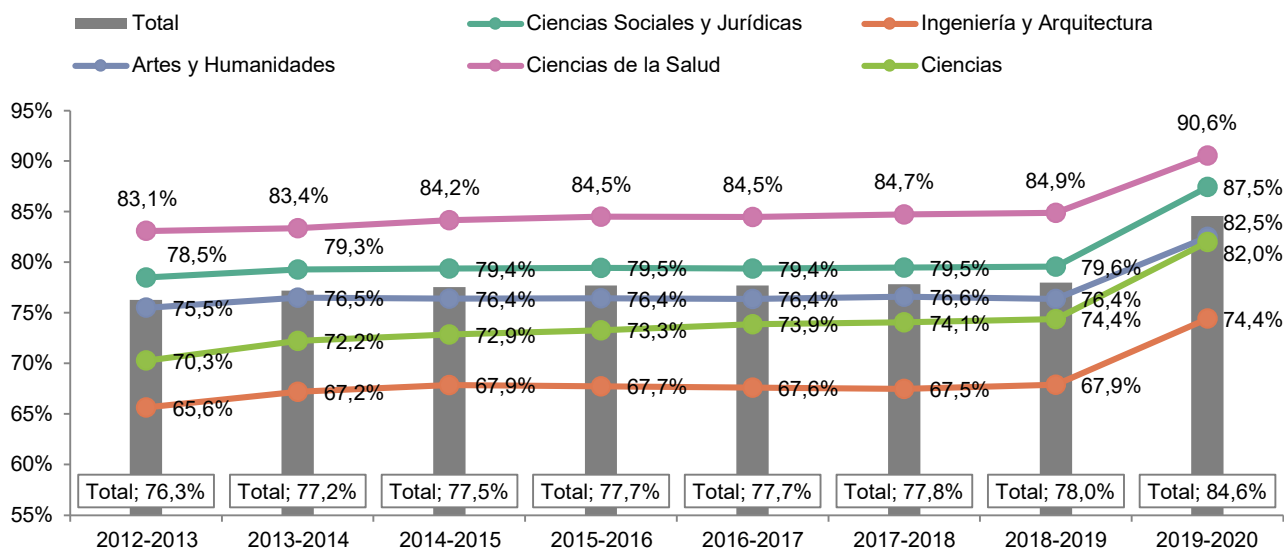

**Tabla 5.1.4** Evolución de las tasas de abandono y cambio de estudio en primer año en Grado por rama de enseñanza

|                               | Cohorte 2015-2016              |                              | Cohorte 2016-2017              |                              | Cohorte 2017-2018              |                              |
|-------------------------------|--------------------------------|------------------------------|--------------------------------|------------------------------|--------------------------------|------------------------------|
|                               | Abandono del estudio en 1º año | Cambio del estudio en 1º año | Abandono del estudio en 1º año | Cambio del estudio en 1º año | Abandono del estudio en 1º año | Cambio del estudio en 1º año |
| <b>Total</b>                  | <b>21,7%</b>                   | <b>8,6%</b>                  | <b>21,8%</b>                   | <b>8,7%</b>                  | <b>21,3%</b>                   | <b>8,3%</b>                  |
| <b>Rama de enseñanza</b>      |                                |                              |                                |                              |                                |                              |
| Ciencias Sociales y Jurídicas | 20,4%                          | 7,4%                         | 20,4%                          | 7,6%                         | 20,3%                          | 7,3%                         |
| Ingeniería y Arquitectura     | 25,1%                          | 11,8%                        | 25,2%                          | 11,0%                        | 25,0%                          | 11,1%                        |
| Artes y Humanidades           | 28,4%                          | 9,1%                         | 28,6%                          | 9,3%                         | 27,5%                          | 9,1%                         |
| Ciencias de la Salud          | 17,4%                          | 7,1%                         | 17,7%                          | 7,5%                         | 16,6%                          | 7,0%                         |
| Ciencias                      | 22,1%                          | 11,3%                        | 23,2%                          | 12,6%                        | 21,7%                          | 11,3%                        |

**Gráfico 5.1.5** Evolución de la nota del expediente académico de los egresados de Grado por rama de enseñanza

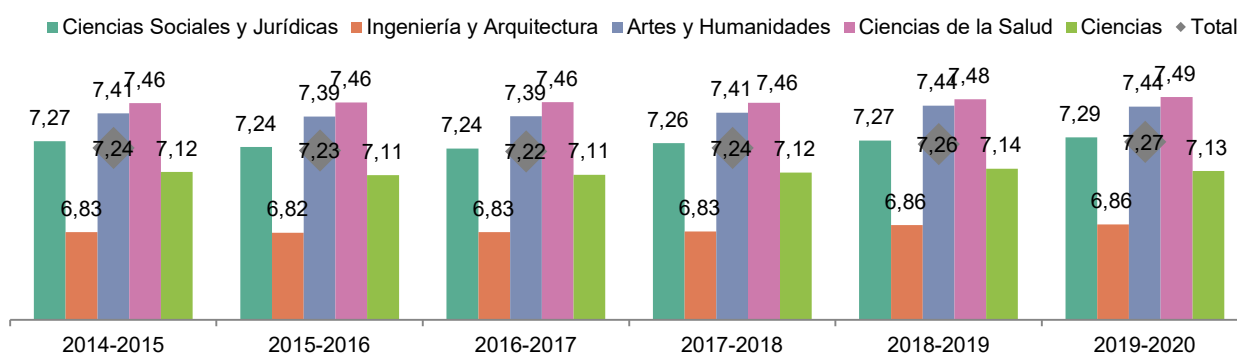

## 5.1 Indicadores de Grado. Principales indicadores

**Tabla 5.1.6** Tasa de rendimiento en Grado por rama de enseñanza y sexo. Curso 2019-2020

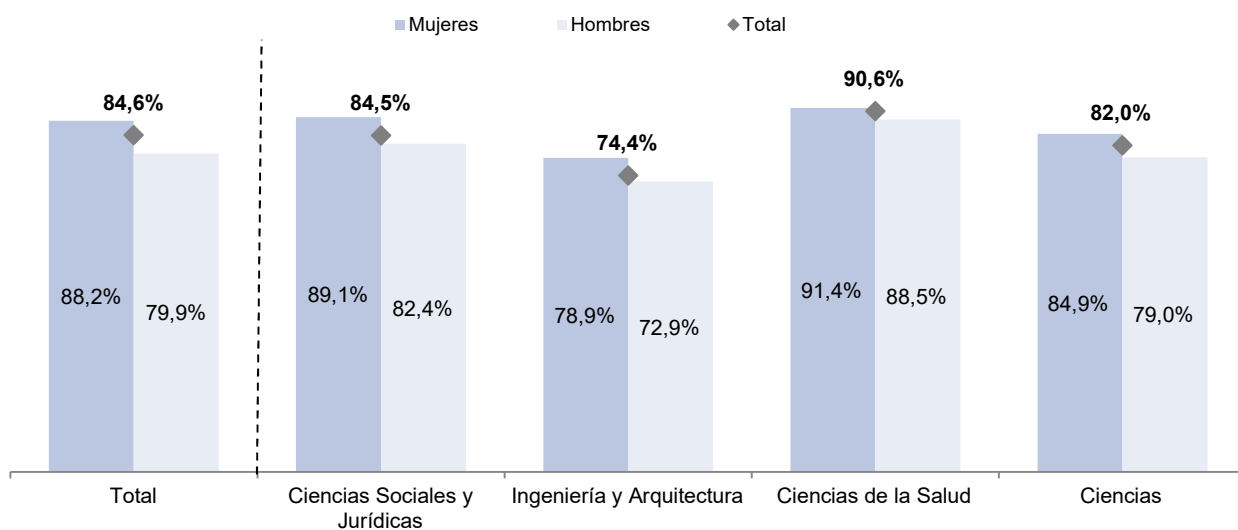

**Tabla 5.1.7** Tasa de abandono y cambio de estudio en Grado el primer año por rama de enseñanza y sexo. Cohorte 2017-2018

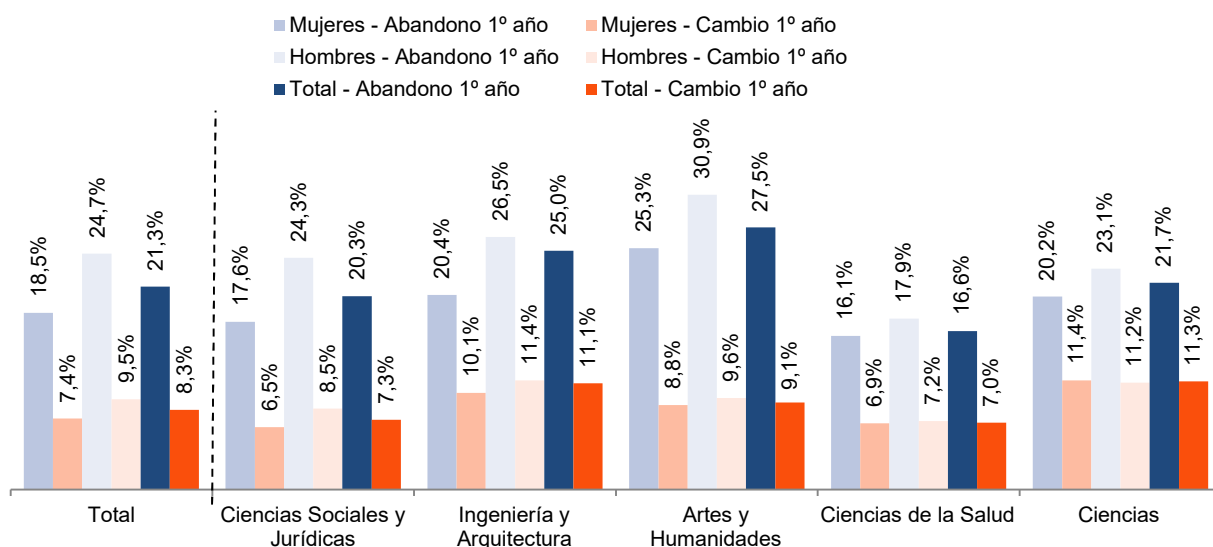

**Tabla 5.1.8** Nota media del expediente académico de los egresados de Grado por rama de enseñanza y sexo. Curso 2019-2020

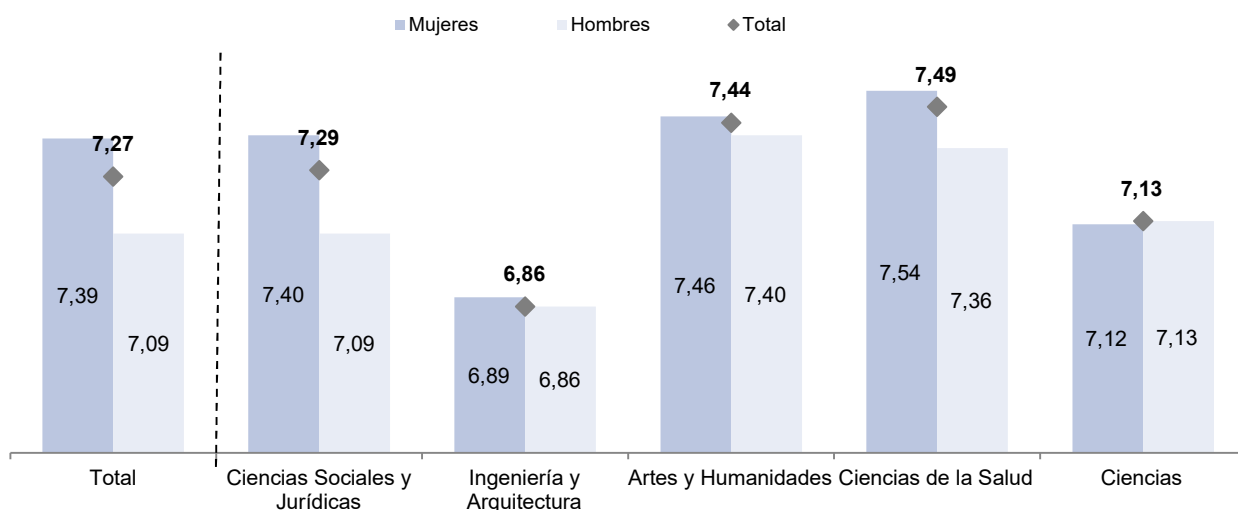



## 5.2 Indicadores de Grado. Número de créditos

**Tabla y gráfico 5.2.1** Número medio de créditos matriculados, presentados y superados en Grado por tipo de universidad. Curso 2019-2020

|                            | Estudiantes matriculados |               | Número medio de créditos |             |              |
|----------------------------|--------------------------|---------------|--------------------------|-------------|--------------|
|                            | Total                    | %             | Superados                | Presentados | Matriculados |
| <b>Total</b>               | <b>1.296.379</b>         | <b>100,0%</b> | 39,9                     | 45,2        | 51,1         |
| <b>Tipo de universidad</b> |                          |               |                          |             |              |
| <b>Univ. públicas</b>      | <b>1.079.175</b>         | <b>83,2%</b>  | 43,1                     | 47,2        | 51,5         |
| Presencial                 | 953.463                  | 88,4%         | 46,6                     | 50,9        | 54,6         |
| No presencial              | 125.712                  | 11,6%         | 16,5                     | 18,8        | 28,3         |
| <b>Univ. privadas</b>      | <b>217.204</b>           | <b>16,8%</b>  | 43,9                     | 46,5        | 49,0         |
| Presencial                 | 151.715                  | 69,8%         | 51,9                     | 54,9        | 56,8         |
| No presencial              | 65.489                   | 30,2%         | 25,6                     | 27,0        | 31,0         |

**Tabla 5.2.2** Número medio de créditos matriculados, presentados y superados en Grado por rama de enseñanza y tipo de universidad. Curso 2019-2020

|                               | Total universidades |             |             | Univ. públicas |             |             | Univ. privadas |             |             |
|-------------------------------|---------------------|-------------|-------------|----------------|-------------|-------------|----------------|-------------|-------------|
|                               | Matric.             | Present.    | Super.      | Matric.        | Present.    | Super.      | Matric.        | Present.    | Super.      |
| <b>Total</b>                  | <b>51,1</b>         | <b>47,0</b> | <b>43,2</b> | <b>51,5</b>    | <b>47,2</b> | <b>43,1</b> | <b>49,0</b>    | <b>46,5</b> | <b>43,9</b> |
| <b>Rama de enseñanza</b>      |                     |             |             |                |             |             |                |             |             |
| Ciencias Sociales y Jurídicas | 51,5                | 47,8        | 44,5        | 52,2           | 48,3        | 44,6        | 48,5           | 46,0        | 44,1        |
| Ingeniería y Arquitectura     | 49,7                | 43,7        | 37,0        | 50,4           | 44,2        | 37,2        | 43,2           | 38,9        | 34,9        |
| Artes y Humanidades           | 46,7                | 41,3        | 38,5        | 47,1           | 41,5        | 38,6        | 42,4           | 39,3        | 37,2        |
| Ciencias de la Salud          | 53,5                | 51,1        | 48,5        | 53,8           | 51,1        | 48,7        | 52,7           | 51,0        | 47,9        |
| Ciencias                      | 52,0                | 47,5        | 42,7        | 52,0           | 47,3        | 42,5        | 54,3           | 52,2        | 47,4        |

**Tabla 5.2.3** Distribución de créditos matriculados en Grado en primera, segunda y tercera y sucesivas matrículas por rama de enseñanza. Cursos 2018-2019 y 2019-2020

|                               | Grado 2018-19               |                              |             |             | Grado 2019-20               |                              |             |             |
|-------------------------------|-----------------------------|------------------------------|-------------|-------------|-----------------------------|------------------------------|-------------|-------------|
|                               | Total créditos matriculados | Distribución según matrícula |             |             | Total créditos matriculados | Distribución según matrícula |             |             |
|                               |                             | 1ª vez                       | 2ª vez      | 3º y más    |                             | 1ª vez                       | 2ª vez      | 3º y más    |
| <b>Total</b>                  | <b>65.678.027</b>           | <b>86,2%</b>                 | <b>9,6%</b> | <b>4,2%</b> | <b>66.002.063</b>           | <b>86,3%</b>                 | <b>9,5%</b> | <b>4,3%</b> |
| <b>Rama de enseñanza</b>      |                             |                              |             |             |                             |                              |             |             |
| Ciencias Sociales y Jurídicas | 30.732.931                  | 87,5%                        | 8,8%        | 3,7%        | 30.912.063                  | 87,6%                        | 8,7%        | 3,8%        |
| Ingeniería y Arquitectura     | 11.348.098                  | 78,4%                        | 14,7%       | 6,6%        | 11.322.623                  | 78,7%                        | 14,4%       | 6,9%        |
| Artes y Humanidades           | 6.166.162                   | 88,0%                        | 8,6%        | 3,4%        | 6.195.063                   | 88,0%                        | 8,5%        | 3,5%        |
| Ciencias de la Salud          | 13.149.339                  | 89,8%                        | 7,1%        | 3,2%        | 13.266.883                  | 89,9%                        | 6,9%        | 3,2%        |
| Ciencias                      | 4.281.497                   | 83,2%                        | 11,7%       | 5,0%        | 4.305.430                   | 83,5%                        | 11,4%       | 5,0%        |

## 5.2 Indicadores de Grado. Número de créditos

**Tabla 5.2.4** Número medio de créditos matriculados, presentados y superados en Grado en universidades públicas presenciales por nota de admisión al estudio. Curso 2019-2020

|                      | Estudiantes matriculados (1) | Número medio de créditos |             |             |
|----------------------|------------------------------|--------------------------|-------------|-------------|
|                      |                              | Matriculados             | Presentados | Superados   |
| <b>Total</b>         | <b>953.463</b>               | <b>54,6</b>              | <b>50,9</b> | <b>46,6</b> |
| <b>Nota admisión</b> |                              |                          |             |             |
| [5-5,5)              | 2,7%                         | 49,4                     | 42,7        | 35,5        |
| [5,5-6)              | 4,1%                         | 50,1                     | 43,6        | 36,8        |
| [6-6,5)              | 5,0%                         | 50,7                     | 44,7        | 38,3        |
| [6,5-7)              | 5,8%                         | 51,7                     | 46,3        | 40,3        |
| [7-8)                | 13,3%                        | 53,2                     | 48,6        | 43,1        |
| [8-9)                | 14,5%                        | 55,1                     | 51,4        | 46,4        |
| [9-10)               | 13,9%                        | 56,9                     | 53,8        | 49,5        |
| [10-12)              | 22,0%                        | 58,2                     | 56,0        | 53,0        |
| [12-14]              | 10,4%                        | 60,1                     | 58,8        | 57,3        |
| No consta            | 8,2%                         | -                        | -           | -           |

**Tabla 5.2.5** Número total de créditos matriculados en Grado en primera, segunda y tercera y sucesivas matrículas por comunidad autónoma. Curso 2019-2020

|                              | Total créditos matriculados | Distribución según matrícula |              |             | Número medio de créditos |             |             |
|------------------------------|-----------------------------|------------------------------|--------------|-------------|--------------------------|-------------|-------------|
|                              |                             | 1ª vez                       | 2ª vez       | 3º y más    | Matriculados             | Presentados | Superados   |
| <b>Total</b>                 | <b>66.002.069</b>           | <b>86,3%</b>                 | <b>9,5%</b>  | <b>4,3%</b> | <b>51,1</b>              | <b>47,0</b> | <b>43,2</b> |
| <b>Univ. presenciales</b>    | <b>60.427.348</b>           | <b>86,9%</b>                 | <b>9,1%</b>  | <b>4,0%</b> | <b>54,9</b>              | <b>51,5</b> | <b>47,3</b> |
| Andalucía                    | 11.053.895                  | 83,4%                        | 11,0%        | 5,7%        | 54,7                     | 49,5        | 45,1        |
| Aragón                       | 1.600.309                   | 85,8%                        | 10,5%        | 3,8%        | 55,3                     | 51,4        | 47,1        |
| Asturias (Principado de)     | 934.368                     | 84,2%                        | 11,4%        | 4,5%        | 53,9                     | 49,2        | 44,3        |
| Balears (Illes)              | 581.963                     | 86,4%                        | 10,1%        | 3,4%        | 50,7                     | 46,5        | 40,5        |
| Canarias                     | 1.860.567                   | 83,8%                        | 11,0%        | 5,2%        | 54,8                     | 51,3        | 45,5        |
| Cantabria                    | 553.554                     | 86,3%                        | 9,1%         | 4,5%        | 53,8                     | 50,5        | 45,2        |
| Castilla - La Mancha         | 1.232.995                   | 86,0%                        | 9,5%         | 4,5%        | 55,9                     | 52,6        | 48,5        |
| Castilla y León              | 3.694.239                   | 87,5%                        | 8,8%         | 3,7%        | 54,9                     | 51,9        | 47,6        |
| Cataluña                     | 9.493.702                   | 91,5%                        | 6,4%         | 2,1%        | 54,7                     | 52,9        | 48,5        |
| Comunitat Valenciana         | 6.586.043                   | 88,1%                        | 8,5%         | 3,4%        | 54,9                     | 52,2        | 48,6        |
| Extremadura                  | 911.640                     | 85,4%                        | 10,1%        | 4,5%        | 53,1                     | 49,8        | 46,1        |
| Galicia                      | 2.722.871                   | 82,3%                        | 10,7%        | 7,1%        | 54,9                     | 50,3        | 46,2        |
| Madrid (Comunidad de)        | 13.100.413                  | 87,7%                        | 8,7%         | 3,6%        | 55,5                     | 52,4        | 48,5        |
| Murcia (Región de)           | 2.242.916                   | 84,4%                        | 10,4%        | 5,1%        | 52,6                     | 48,3        | 44,5        |
| Navarra (Comunidad Foral d   | 923.656                     | 91,5%                        | 6,5%         | 1,9%        | 58,1                     | 56,3        | 52,9        |
| País Vasco                   | 2.738.464                   | 87,5%                        | 8,2%         | 4,3%        | 56,1                     | 52,5        | 48,9        |
| Rioja (La)                   | 195.757                     | 85,4%                        | 10,4%        | 4,2%        | 55,5                     | 52,1        | 47,8        |
| <b>Univ. no presenciales</b> | <b>5.574.721</b>            | <b>79,8%</b>                 | <b>13,7%</b> | <b>6,5%</b> | <b>29,2</b>              | <b>21,6</b> | <b>19,6</b> |

(1) Tanto la distribución como los datos del indicador se refieren al total de estudiantes matriculados este curso y no únicamente a los de nuevo ingreso.

## 5.3 Indicadores de Grado. Rendimiento

**Tabla 5.3.1** Tasas de rendimiento, éxito y evaluación por tipo de universidad. Cursos 2018-2019 y 2019-2020

|                            | Grado 2018-19 |              |              | Grado 2019-20 |              |              |
|----------------------------|---------------|--------------|--------------|---------------|--------------|--------------|
|                            | Rendimiento   | Éxito        | Evaluación   | Rendimiento   | Éxito        | Evaluación   |
| <b>Total</b>               | <b>78,0%</b>  | <b>88,1%</b> | <b>88,5%</b> | <b>84,6%</b>  | <b>91,9%</b> | <b>92,1%</b> |
| <b>Tipo de universidad</b> |               |              |              |               |              |              |
| <b>Univ. Públicas</b>      | <b>76,7%</b>  | <b>87,5%</b> | <b>87,6%</b> | <b>83,6%</b>  | <b>91,3%</b> | <b>91,5%</b> |
| Presencial                 | 79,0%         | 87,7%        | 90,1%        | 85,3%         | 91,5%        | 93,2%        |
| No Presencial              | 43,4%         | 83,4%        | 52,1%        | 58,2%         | 87,7%        | 66,4%        |
| <b>Univ. Privadas</b>      | <b>85,4%</b>  | <b>91,5%</b> | <b>93,3%</b> | <b>89,7%</b>  | <b>94,5%</b> | <b>94,9%</b> |
| Presencial                 | 87,4%         | 91,3%        | 95,7%        | 91,4%         | 94,5%        | 96,7%        |
| No Presencial              | 76,4%         | 92,1%        | 83,0%        | 82,5%         | 94,8%        | 87,0%        |

**Tabla 5.3.2** Tasas de rendimiento, éxito y evaluación por rama de enseñanza y tipo de universidad. Cursos 2018-19 y 2019-20

|                               | Grado 2018-19 |              |              | Grado 2019-20 |              |              |
|-------------------------------|---------------|--------------|--------------|---------------|--------------|--------------|
|                               | Rendimiento   | Éxito        | Evaluación   | Rendimiento   | Éxito        | Evaluación   |
| <b>Total</b>                  | <b>78,0%</b>  | <b>88,1%</b> | <b>88,5%</b> | <b>84,6%</b>  | <b>91,9%</b> | <b>92,1%</b> |
| <b>Rama de enseñanza</b>      |               |              |              |               |              |              |
| Ciencias Sociales y Jurídicas | 79,6%         | 89,4%        | 89,0%        | 86,5%         | 3,0%         | 92,9%        |
| Ingeniería y Arquitectura     | 67,9%         | 80,4%        | 84,5%        | 74,4%         | 84,7%        | 87,9%        |
| Artes y Humanidades           | 76,4%         | 90,7%        | 84,2%        | 82,5%         | 93,2%        | 88,6%        |
| Ciencias de la Salud          | 84,9%         | 91,3%        | 93,0%        | 90,6%         | 94,9%        | 95,4%        |
| Ciencias                      | 74,4%         | 84,9%        | 87,6%        | 82,0%         | 89,9%        | 91,2%        |
| <b>Univ. públicas</b>         | <b>76,7%</b>  | <b>87,5%</b> | <b>87,6%</b> | <b>83,6%</b>  | <b>91,3%</b> | <b>91,5%</b> |
| <b>Rama de enseñanza</b>      |               |              |              |               |              |              |
| Ciencias Sociales y Jurídicas | 78,1%         | 88,6%        | 88,2%        | 85,5%         | 92,4%        | 92,5%        |
| Ingeniería y Arquitectura     | 67,1%         | 79,8%        | 84,2%        | 73,9%         | 84,2%        | 87,7%        |
| Artes y Humanidades           | 75,6%         | 90,4%        | 83,6%        | 82,3%         | 93,0%        | 88,2%        |
| Ciencias de la Salud          | 84,7%         | 92,0%        | 92,1%        | 90,5%         | 95,2%        | 95,0%        |
| Ciencias                      | 74,1%         | 84,9%        | 87,3%        | 81,8%         | 89,9%        | 91,0%        |
| <b>Univ. privadas</b>         | <b>85,3%</b>  | <b>91,5%</b> | <b>93,3%</b> | <b>89,7%</b>  | <b>94,5%</b> | <b>94,9%</b> |
| <b>Rama de enseñanza</b>      |               |              |              |               |              |              |
| Ciencias Sociales y Jurídicas | 86,8%         | 93,4%        | 92,9%        | 90,8%         | 95,7%        | 94,8%        |
| Ingeniería y Arquitectura     | 76,8%         | 87,1%        | 88,1%        | 80,8%         | 89,8%        | 89,9%        |
| Artes y Humanidades           | 85,6%         | 93,5%        | 91,6%        | 87,6%         | 94,5%        | 92,7%        |
| Ciencias de la Salud          | 85,5%         | 89,5%        | 95,5%        | 90,8%         | 94,0%        | 96,6%        |
| Ciencias                      | 81,9%         | 86,4%        | 94,8%        | 87,4%         | 90,8%        | 96,2%        |

## 5.3 Indicadores de Grado. Rendimiento

**Tabla 5.3.3** Tasas de rendimiento, éxito y evaluación en Grado por comunidad autónoma. Cursos 2018-2019 y 2019-2020

|                              | Grado 2018-19                  |              |              |              | Grado 2019-20                  |              |              |              |
|------------------------------|--------------------------------|--------------|--------------|--------------|--------------------------------|--------------|--------------|--------------|
|                              | Total estudiantes matriculados | Rendimiento  | Éxito        | Evaluación   | Total estudiantes matriculados | Rendimiento  | Éxito        | Evaluación   |
| <b>Total</b>                 | <b>1.290.346</b>               | <b>78,0%</b> | <b>88,1%</b> | <b>88,5%</b> | <b>1.296.379</b>               | <b>84,6%</b> | <b>91,9%</b> | <b>92,1%</b> |
| <b>Univ. presenciales</b>    | <b>1.099.446</b>               | <b>80,1%</b> | <b>88,2%</b> | <b>90,9%</b> | <b>1.105.178</b>               | <b>86,2%</b> | <b>92,0%</b> | <b>93,7%</b> |
| Andalucía                    | 206.310                        | 75,1%        | 86,8%        | 86,5%        | 204.518                        | 82,5%        | 91,2%        | 90,5%        |
| Aragón                       | 29.213                         | 79,3%        | 87,7%        | 90,4%        | 29.214                         | 85,2%        | 91,7%        | 92,9%        |
| Asturias (Ppdo. de)          | 17.513                         | 76,0%        | 86,1%        | 88,2%        | 17.381                         | 82,2%        | 89,9%        | 91,4%        |
| Balears (Illes)              | 11.197                         | 76,7%        | 84,7%        | 90,5%        | 11.479                         | 79,8%        | 87,0%        | 91,7%        |
| Canarias                     | 34.212                         | 74,9%        | 86,7%        | 86,4%        | 33.980                         | 83,2%        | 88,8%        | 93,7%        |
| Cantabria                    | 10.272                         | 80,3%        | 87,2%        | 92,0%        | 10.297                         | 84,0%        | 89,6%        | 93,8%        |
| Castilla - La Mancha         | 21.943                         | 78,7%        | 87,1%        | 90,3%        | 22.594                         | 86,8%        | 92,2%        | 94,2%        |
| Castilla y León              | 66.330                         | 81,1%        | 87,9%        | 92,3%        | 67.283                         | 86,7%        | 91,8%        | 94,4%        |
| Cataluña                     | 173.230                        | 85,3%        | 90,2%        | 94,6%        | 174.165                        | 88,7%        | 91,8%        | 96,6%        |
| Comunitat Valenciana         | 119.749                        | 82,5%        | 89,2%        | 92,6%        | 120.275                        | 88,5%        | 93,2%        | 95,0%        |
| Extremadura                  | 17.493                         | 79,3%        | 87,4%        | 90,8%        | 17.165                         | 86,9%        | 92,7%        | 93,7%        |
| Galicia                      | 49.582                         | 75,4%        | 85,7%        | 88,0%        | 49.645                         | 84,2%        | 91,9%        | 91,6%        |
| Madrid (Com. de)             | 232.411                        | 81,6%        | 88,4%        | 92,3%        | 236.150                        | 87,4%        | 92,6%        | 94,4%        |
| Murcia (Región de)           | 42.334                         | 76,5%        | 86,8%        | 88,1%        | 42.731                         | 84,6%        | 92,3%        | 91,7%        |
| Navarra (Com. Foral de)      | 15.581                         | 87,3%        | 90,8%        | 96,1%        | 15.934                         | 90,9%        | 93,8%        | 96,9%        |
| País Vasco                   | 48.514                         | 81,7%        | 89,7%        | 91,1%        | 48.841                         | 87,1%        | 93,1%        | 93,5%        |
| Rioja (La)                   | 3.562                          | 78,1%        | 86,4%        | 90,4%        | 3.526                          | 86,1%        | 91,7%        | 93,9%        |
| <b>Univ. no presenciales</b> | <b>190.900</b>                 | <b>54,6%</b> | <b>87,3%</b> | <b>62,6%</b> | <b>191.201</b>                 | <b>67,0%</b> | <b>90,7%</b> | <b>73,9%</b> |

**Tabla 5.3.4** Tasas de rendimiento, éxito y evaluación en Grado en universidades públicas presenciales por nota de admisión al estudio. Curso 2019-2020

|                                       | Estudiantes matriculados | Rendimiento  | Éxito        | Evaluación   |
|---------------------------------------|--------------------------|--------------|--------------|--------------|
| <b>Total</b>                          | <b>953.463</b>           | <b>85,3%</b> | <b>91,5%</b> | <b>93,2%</b> |
| <b>Nota de admisión<sup>(1)</sup></b> |                          |              |              |              |
| [5-5,5)                               | 2,7%                     | 71,7%        | 83,1%        | 86,3%        |
| [5,5-6)                               | 4,1%                     | 73,4%        | 84,5%        | 86,9%        |
| [6-6,5)                               | 5,0%                     | 75,5%        | 85,7%        | 88,1%        |
| [6,5-7)                               | 5,8%                     | 77,9%        | 86,9%        | 89,6%        |
| [7-8)                                 | 13,3%                    | 81,1%        | 88,7%        | 91,4%        |
| [8-9)                                 | 14,5%                    | 84,3%        | 90,4%        | 93,2%        |
| [9-10)                                | 13,9%                    | 87,1%        | 92,1%        | 94,7%        |
| [10-12)                               | 22,0%                    | 91,0%        | 94,7%        | 96,2%        |
| [12-14]                               | 10,4%                    | 95,3%        | 97,5%        | 97,7%        |
| No consta                             | 8,2%                     | -            | -            | -            |

(1) Tanto la distribución como los datos del indicador se refieren al total de estudiantes matriculados este curso y no únicamente a los de nuevo ingreso.

## 5.3 Indicadores de Grado. Rendimiento

**Tabla 5.3.5** Tasa de rendimiento en Grado según el número de créditos aprobados desde el inicio por ámbito de estudio. Curso 2019-2020

|                                                                         | Total        | Créditos aprobados desde el inicio del estudio |              |              |              |              |
|-------------------------------------------------------------------------|--------------|------------------------------------------------|--------------|--------------|--------------|--------------|
|                                                                         |              | [0,60)                                         | [60,120)     | [120,180)    | [180,240)    | [240,300]    |
| <b>Total</b>                                                            | <b>84,6%</b> | <b>56,0%</b>                                   | <b>88,0%</b> | <b>90,3%</b> | <b>91,1%</b> | <b>98,3%</b> |
| <b>Ámbito de estudio</b>                                                |              |                                                |              |              |              |              |
| <b>Total Educación</b>                                                  | <b>93,5%</b> | <b>73,3%</b>                                   | <b>95,3%</b> | <b>95,5%</b> | <b>95,2%</b> | <b>99,4%</b> |
| Formación de docentes de enseñanza infantil                             | 94,9%        | 78,3%                                          | 96,3%        | 96,0%        | 96,5%        | 99,7%        |
| Formación de docentes de enseñanza primaria                             | 94,1%        | 76,1%                                          | 95,4%        | 95,6%        | 94,9%        | 99,2%        |
| Otra Formación de personal docente y ciencias de la educación           | 89,4%        | 63,1%                                          | 92,9%        | 94,5%        | 94,3%        | 99,8%        |
| <b>Total Artes y humanidades</b>                                        | <b>83,8%</b> | <b>53,9%</b>                                   | <b>88,2%</b> | <b>90,1%</b> | <b>90,1%</b> | <b>99,3%</b> |
| Técnicas audiovisuales y medios de comunicación                         | 90,9%        | 68,4%                                          | 93,6%        | 94,4%        | 91,8%        | 99,2%        |
| Artes                                                                   | 85,2%        | 55,0%                                          | 90,1%        | 90,8%        | 89,6%        | 99,3%        |
| Lenguas                                                                 | 83,2%        | 51,9%                                          | 86,2%        | 89,0%        | 90,1%        | 99,2%        |
| Humanidades                                                             | 78,4%        | 50,9%                                          | 85,7%        | 87,8%        | 89,3%        | 99,3%        |
| <b>Total Ciencias sociales, periodismo y documentación</b>              | <b>83,4%</b> | <b>53,6%</b>                                   | <b>89,3%</b> | <b>91,7%</b> | <b>92,0%</b> | <b>98,7%</b> |
| Psicología                                                              | 82,4%        | 51,1%                                          | 89,5%        | 93,1%        | 94,6%        | 99,4%        |
| Economía                                                                | 77,4%        | 49,2%                                          | 82,9%        | 85,8%        | 87,3%        | 98,5%        |
| Otras Ciencias sociales y del comportamiento                            | 84,5%        | 56,1%                                          | 90,6%        | 91,9%        | 91,2%        | 98,7%        |
| Periodismo e información                                                | 90,1%        | 67,0%                                          | 92,8%        | 93,8%        | 92,0%        | 97,3%        |
| <b>Total Negocios, administración y derecho</b>                         | <b>82,6%</b> | <b>55,7%</b>                                   | <b>86,0%</b> | <b>88,4%</b> | <b>89,1%</b> | <b>97,1%</b> |
| Administración y gestión de empresas                                    | 81,1%        | 55,3%                                          | 85,1%        | 87,4%        | 88,3%        | 97,5%        |
| Otra Educación comercial y empresarial                                  | 84,7%        | 60,6%                                          | 88,6%        | 90,1%        | 88,6%        | 98,4%        |
| Derecho                                                                 | 83,5%        | 54,4%                                          | 85,8%        | 88,7%        | 90,5%        | 96,3%        |
| <b>Total Ciencias</b>                                                   | <b>82,3%</b> | <b>50,5%</b>                                   | <b>86,0%</b> | <b>88,8%</b> | <b>91,2%</b> | <b>98,8%</b> |
| Ciencias de la vida                                                     | 88,0%        | 58,9%                                          | 89,8%        | 92,6%        | 93,7%        | 99,5%        |
| Ciencias Físicas, químicas, geológicas                                  | 77,9%        | 46,8%                                          | 81,9%        | 85,0%        | 88,4%        | 98,7%        |
| Matemáticas y Estadística                                               | 76,2%        | 44,6%                                          | 84,7%        | 85,8%        | 88,8%        | 95,6%        |
| <b>Total Informática</b>                                                | <b>73,6%</b> | <b>49,0%</b>                                   | <b>80,9%</b> | <b>84,1%</b> | <b>84,6%</b> | <b>97,8%</b> |
| Informática                                                             | 73,6%        | 49,0%                                          | 80,9%        | 84,1%        | 84,6%        | 97,8%        |
| <b>Total Ingeniería, industria y construcción</b>                       | <b>74,3%</b> | <b>48,2%</b>                                   | <b>78,7%</b> | <b>82,9%</b> | <b>85,2%</b> | <b>96,2%</b> |
| Ingenierías                                                             | 74,4%        | 48,8%                                          | 79,0%        | 83,3%        | 85,4%        | 98,7%        |
| Arquitectura y construcción                                             | 73,6%        | 45,2%                                          | 77,0%        | 81,1%        | 83,7%        | 90,1%        |
| <b>Total Agricultura, ganadería, silvicultura, pesca, y veterinaria</b> | <b>82,7%</b> | <b>54,7%</b>                                   | <b>84,7%</b> | <b>86,8%</b> | <b>88,5%</b> | <b>96,4%</b> |
| Agricultura, ganadería y pesca                                          | 72,7%        | 47,7%                                          | 78,0%        | 81,7%        | 82,6%        | 99,1%        |
| Veterinaria                                                             | 91,0%        | 69,9%                                          | 90,9%        | 91,2%        | 93,7%        | 95,9%        |
| <b>Total Salud y servicios sociales</b>                                 | <b>92,9%</b> | <b>69,5%</b>                                   | <b>93,2%</b> | <b>95,0%</b> | <b>96,2%</b> | <b>98,8%</b> |
| Medicina                                                                | 95,2%        | 70,4%                                          | 94,1%        | 96,3%        | 96,8%        | 97,8%        |
| Enfermería y atención a enfermos                                        | 95,3%        | 76,2%                                          | 95,7%        | 96,8%        | 98,3%        | 100,0%       |
| Otras ciencias de la Salud                                              | 90,6%        | 67,7%                                          | 91,0%        | 93,4%        | 95,1%        | 98,5%        |
| Trabajo social y orientación                                            | 89,6%        | 63,8%                                          | 92,4%        | 94,1%        | 94,3%        | 99,7%        |
| <b>Total Servicios</b>                                                  | <b>86,4%</b> | <b>64,1%</b>                                   | <b>89,4%</b> | <b>90,5%</b> | <b>90,4%</b> | <b>99,6%</b> |
| Deportes                                                                | 90,0%        | 72,7%                                          | 91,7%        | 91,7%        | 93,0%        | 99,7%        |
| Turismo y Hostelería                                                    | 82,7%        | 57,5%                                          | 86,4%        | 89,0%        | 87,8%        | 99,5%        |
| Otros Servicios                                                         | 86,3%        | 65,7%                                          | 90,3%        | 91,6%        | 90,2%        | 100,0%       |

## 5.4 Indicadores de Grado. Abandono y cambio de estudio

**Tabla 5.4.1** Tasas globales de abandono y cambio del estudio en Grado por tipo de universidad. Cohorte de nuevo ingreso de 2015-2016

|                                         | Total                |                   | Univ. públicas       |                   | Univ. privadas       |                   |
|-----------------------------------------|----------------------|-------------------|----------------------|-------------------|----------------------|-------------------|
|                                         | Abandono del estudio | Cambio de estudio | Abandono del estudio | Cambio de estudio | Abandono del estudio | Cambio de estudio |
| <b>Total</b>                            | <b>33,2%</b>         | <b>12,4%</b>      | <b>33,9%</b>         | <b>13,1%</b>      | <b>29,6%</b>         | <b>8,7%</b>       |
| <b>Presencialidad de la universidad</b> |                      |                   |                      |                   |                      |                   |
| Univ. presenciales                      | 26,0%                | 12,5%             | 26,6%                | 13,0%             | 22,3%                | 9,2%              |
| Univ. no presenciales                   | 65,4%                | 12,0%             | 72,5%                | 13,6%             | 46,4%                | 7,7%              |

**Tabla 5.4.2** Tasas globales de abandono y cambio del estudio en Grado por rama de enseñanza y tipo de universidad. Cohorte de nuevo ingreso de 2015-2016

|                               | Total                |                   | Univ. públicas       |                   | Univ. privadas       |                   |
|-------------------------------|----------------------|-------------------|----------------------|-------------------|----------------------|-------------------|
|                               | Abandono del estudio | Cambio de estudio | Abandono del estudio | Cambio de estudio | Abandono del estudio | Cambio de estudio |
| <b>Total</b>                  | <b>33,2%</b>         | <b>12,4%</b>      | <b>33,9%</b>         | <b>13,1%</b>      | <b>29,6%</b>         | <b>8,7%</b>       |
| <b>Rama de enseñanza</b>      |                      |                   |                      |                   |                      |                   |
| Ciencias Sociales y Jurídicas | 31,4%                | 10,5%             | 32,1%                | 11,4%             | 28,4%                | 7,2%              |
| Ingeniería y Arquitectura     | 39,1%                | 18,0%             | 39,1%                | 18,5%             | 39,5%                | 12,7%             |
| Artes y Humanidades           | 42,8%                | 13,0%             | 42,3%                | 13,1%             | 49,1%                | 11,7%             |
| Ciencias de la Salud          | 26,4%                | 10,0%             | 26,8%                | 10,1%             | 25,0%                | 9,7%              |
| Ciencias                      | 34,1%                | 16,3%             | 34,1%                | 16,1%             | 35,3%                | 20,3%             |

**Gráfico 5.4.3** Tasas globales de abandono y cambio del estudio en Grado en universidades públicas presenciales por nota de admisión al estudio. Cohorte de nuevo ingreso en el curso 2015-2016

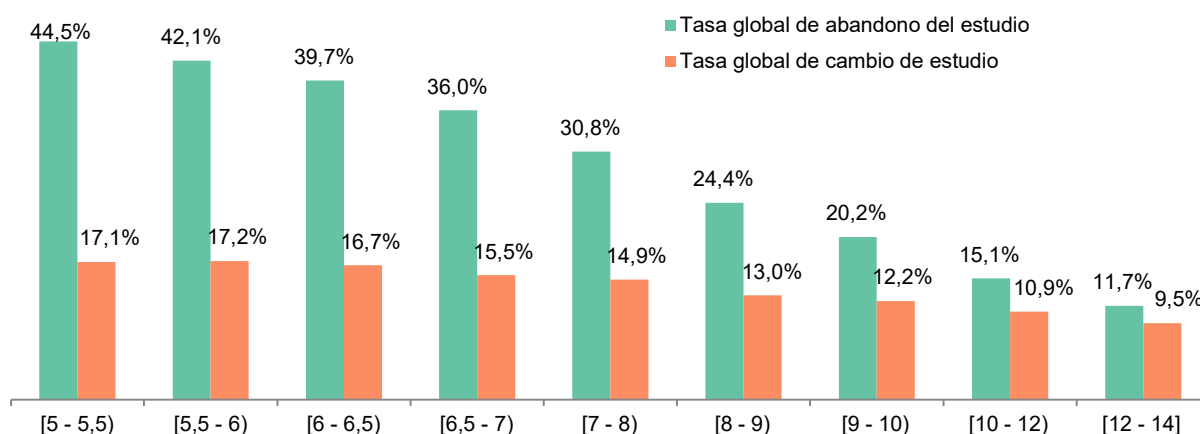

## 5.4 Indicadores de Grado. Abandono y cambio de estudio

**Tabla 5.4.4** Tasas globales de abandono y cambio del estudio en Grado por comunidad autónoma y tipo de universidad. Cohorte de nuevo ingreso de 2015-2016

|                              | Total                |                   | Univ. públicas       |                   | Univ. privadas       |                   |
|------------------------------|----------------------|-------------------|----------------------|-------------------|----------------------|-------------------|
|                              | Abandono del estudio | Cambio de estudio | Abandono del estudio | Cambio de estudio | Abandono del estudio | Cambio de estudio |
| <b>Total</b>                 | <b>33,2%</b>         | <b>12,4%</b>      | <b>33,9%</b>         | <b>13,1%</b>      | <b>29,6%</b>         | <b>8,7%</b>       |
| <b>Univ. Presenciales</b>    | <b>26,0%</b>         | <b>12,5%</b>      | <b>26,6%</b>         | <b>13,0%</b>      | <b>22,3%</b>         | <b>9,2%</b>       |
| Andalucía                    | 27,0%                | 12,6%             | 27,0%                | 12,5%             | 30,4%                | 20,2%             |
| Aragón                       | 27,4%                | 13,7%             | 27,7%                | 14,4%             | 23,6%                | 6,0%              |
| Asturias (Principado de)     | 35,0%                | 17,8%             | 35,0%                | 17,8%             |                      |                   |
| Balears (Illes)              | 39,6%                | 18,1%             | 39,6%                | 18,1%             |                      |                   |
| Canarias                     | 34,8%                | 13,1%             | 35,3%                | 13,2%             | 15,0%                | 7,7%              |
| Cantabria                    | 29,0%                | 16,6%             | 31,1%                | 18,0%             | 16,7%                | 8,6%              |
| Castilla - La Mancha         | 24,1%                | 11,6%             | 24,1%                | 11,6%             |                      |                   |
| Castilla y León              | 22,7%                | 10,9%             | 22,8%                | 12,1%             | 22,2%                | 5,9%              |
| Cataluña                     | 26,7%                | 13,8%             | 27,2%                | 14,4%             | 23,4%                | 9,7%              |
| Comunitat Valenciana         | 24,1%                | 10,3%             | 24,8%                | 10,7%             | 20,3%                | 8,3%              |
| Extremadura                  | 24,5%                | 11,0%             | 24,5%                | 11,0%             |                      |                   |
| Galicia                      | 27,9%                | 13,2%             | 27,9%                | 13,2%             |                      |                   |
| Madrid (Comunidad de)        | 23,3%                | 12,0%             | 23,8%                | 12,9%             | 22,0%                | 9,2%              |
| Murcia (Región de)           | 28,3%                | 13,9%             | 29,1%                | 15,2%             | 26,3%                | 10,2%             |
| Navarra (Comunidad Foral de) | 27,8%                | 13,2%             | 25,7%                | 12,5%             | 29,7%                | 13,9%             |
| País Vasco                   | 22,3%                | 10,5%             | 24,5%                | 11,5%             | 16,3%                | 7,8%              |
| Rioja (La)                   | 31,3%                | 14,6%             | 31,3%                | 14,6%             |                      |                   |
| <b>Univ. No presenciales</b> | <b>65,4%</b>         | <b>12,0%</b>      | <b>72,5%</b>         | <b>13,6%</b>      | <b>46,4%</b>         | <b>7,7%</b>       |

**Gráfico 5.4.5** Tasas parciales de abandono del estudio en Grado en universidades presenciales por comunidad autónoma. Cohorte de nuevo ingreso de 2015-2016

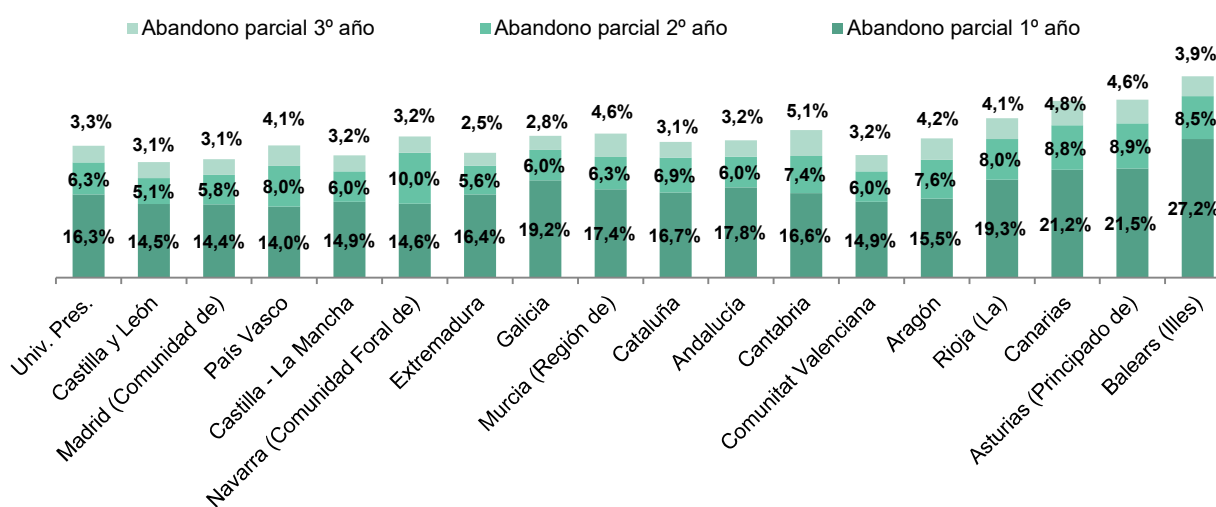

## 5.4 Indicadores de Grado. Abandono y cambio de estudio

**Tabla 5.4.6** Tasas parciales de abandono y cambio del estudio en primer año en Grado por tipo de universidad. Cohorte de nuevo ingreso de 2017-2018

|                                         | Total                          |                              | Univ. públicas                 |                              | Univ. privadas                 |                              |
|-----------------------------------------|--------------------------------|------------------------------|--------------------------------|------------------------------|--------------------------------|------------------------------|
|                                         | Abandono del estudio en 1º año | Cambio del estudio en 1º año | Abandono del estudio en 1º año | Cambio del estudio en 1º año | Abandono del estudio en 1º año | Cambio del estudio en 1º año |
| <b>Total</b>                            | <b>21,3%</b>                   | <b>8,3%</b>                  | <b>21,7%</b>                   | <b>8,8%</b>                  | <b>19,3%</b>                   | <b>6,2%</b>                  |
| <b>Presencialidad de la universidad</b> |                                |                              |                                |                              |                                |                              |
| Univ. presenciales                      | 16,5%                          | 8,3%                         | 16,9%                          | 8,6%                         | 14,2%                          | 6,6%                         |
| Univ. no presenciales                   | 43,4%                          | 8,7%                         | 50,3%                          | 10,3%                        | 29,9%                          | 5,4%                         |

**Tabla 5.4.7** Tasas parciales de abandono y cambio del estudio en primer año en Grado por rama de enseñanza y tipo de universidad. Cohorte de nuevo ingreso de 2017-2018

|                               | Total                          |                              | Univ. públicas                 |                              | Univ. privadas                 |                              |
|-------------------------------|--------------------------------|------------------------------|--------------------------------|------------------------------|--------------------------------|------------------------------|
|                               | Abandono del estudio en 1º año | Cambio del estudio en 1º año | Abandono del estudio en 1º año | Cambio del estudio en 1º año | Abandono del estudio en 1º año | Cambio del estudio en 1º año |
| <b>Total</b>                  | <b>21,3%</b>                   | <b>8,3%</b>                  | <b>21,7%</b>                   | <b>8,8%</b>                  | <b>19,3%</b>                   | <b>6,2%</b>                  |
| <b>Rama de enseñanza</b>      |                                |                              |                                |                              |                                |                              |
| Ciencias Sociales y Jurídicas | 20,3%                          | 7,3%                         | 20,8%                          | 7,9%                         | 18,3%                          | 5,2%                         |
| Ingeniería y Arquitectura     | 25,0%                          | 11,1%                        | 25,1%                          | 11,6%                        | 24,5%                          | 7,4%                         |
| Artes y Humanidades           | 27,5%                          | 9,1%                         | 27,0%                          | 9,1%                         | 31,3%                          | 9,6%                         |
| Ciencias de la Salud          | 16,6%                          | 7,0%                         | 16,7%                          | 7,1%                         | 16,4%                          | 6,7%                         |
| Ciencias                      | 21,7%                          | 11,3%                        | 21,6%                          | 11,3%                        | 23,3%                          | 12,6%                        |

**Gráfico 5.4.8** Tasas parciales de abandono y cambio del estudio en primer año en Grado en universidades públicas presenciales por nota de admisión al estudio. Cohorte de nuevo ingreso de 2017-2018

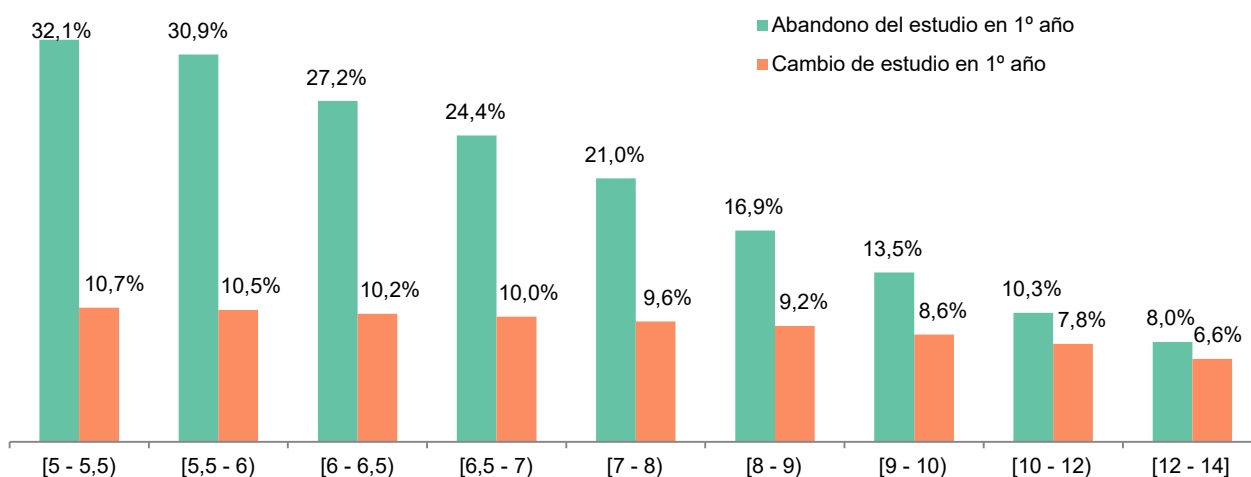



## 5.4 Indicadores de Grado. Abandono y cambio de estudio

**Tabla 5.4.9** Tasas parciales de abandono y cambio del estudio en primer año en Grado por comunidad autónoma y tipo de universidad. Cohorte de nuevo ingreso de 2017-2018

|                              | Total                          |                             | Univ. públicas                 |                             | Univ. privadas                 |                             |
|------------------------------|--------------------------------|-----------------------------|--------------------------------|-----------------------------|--------------------------------|-----------------------------|
|                              | Abandono del estudio en 1º año | Cambio de estudio en 1º año | Abandono del estudio en 1º año | Cambio de estudio en 1º año | Abandono del estudio en 1º año | Cambio de estudio en 1º año |
| <b>Total</b>                 | <b>21,3%</b>                   | <b>8,3%</b>                 | <b>21,7%</b>                   | <b>8,8%</b>                 | <b>19,3%</b>                   | <b>6,2%</b>                 |
| <b>Univ. presenciales</b>    | <b>16,5%</b>                   | <b>8,3%</b>                 | <b>16,9%</b>                   | <b>8,6%</b>                 | <b>14,2%</b>                   | <b>6,6%</b>                 |
| Andalucía                    | 16,8%                          | 7,8%                        | 16,8%                          | 7,8%                        | 19,2%                          | 11,9%                       |
| Aragón                       | 16,2%                          | 7,6%                        | 16,6%                          | 7,8%                        | 12,1%                          | 5,0%                        |
| Asturias (Principado de)     | 23,5%                          | 11,5%                       | 23,5%                          | 11,5%                       |                                |                             |
| Baleares (Illes)             | 25,2%                          | 11,9%                       | 25,2%                          | 11,9%                       |                                |                             |
| Canarias                     | 21,6%                          | 9,0%                        | 22,2%                          | 9,1%                        | 6,6%                           | 4,3%                        |
| Cantabria                    | 18,4%                          | 9,0%                        | 17,8%                          | 9,2%                        | 20,6%                          | 8,0%                        |
| Castilla - La Mancha         | 18,0%                          | 8,9%                        | 18,0%                          | 8,9%                        |                                |                             |
| Castilla y León              | 16,2%                          | 7,5%                        | 16,5%                          | 8,4%                        | 15,1%                          | 4,2%                        |
| Cataluña                     | 16,8%                          | 9,0%                        | 17,1%                          | 9,3%                        | 14,8%                          | 7,0%                        |
| Comunitat Valenciana         | 15,4%                          | 7,4%                        | 15,9%                          | 7,7%                        | 12,6%                          | 5,5%                        |
| Extremadura                  | 14,0%                          | 6,5%                        | 14,0%                          | 6,5%                        |                                |                             |
| Galicia                      | 18,0%                          | 8,3%                        | 18,0%                          | 8,3%                        |                                |                             |
| Madrid (Comunidad de)        | 14,8%                          | 8,4%                        | 14,8%                          | 8,7%                        | 14,5%                          | 7,5%                        |
| Murcia (Región de)           | 18,3%                          | 9,5%                        | 19,9%                          | 11,0%                       | 14,7%                          | 6,2%                        |
| Navarra (Comunidad Foral de) | 14,5%                          | 7,4%                        | 15,3%                          | 8,0%                        | 13,9%                          | 6,9%                        |
| País Vasco                   | 14,5%                          | 7,4%                        | 15,9%                          | 8,1%                        | 10,8%                          | 5,3%                        |
| Rioja (La)                   | 18,7%                          | 9,1%                        | 18,7%                          | 9,1%                        |                                |                             |
| <b>Univ. no presenciales</b> | <b>43,4%</b>                   | <b>8,7%</b>                 | <b>50,3%</b>                   | <b>10,3%</b>                | <b>29,9%</b>                   | <b>5,4%</b>                 |

## 5.5 Indicadores de Grado. Nota del expediente

**Gráfico 5.5.1** Distribución del número de estudiantes egresados de Grado por nota media del expediente académico. Curso 2019-2020

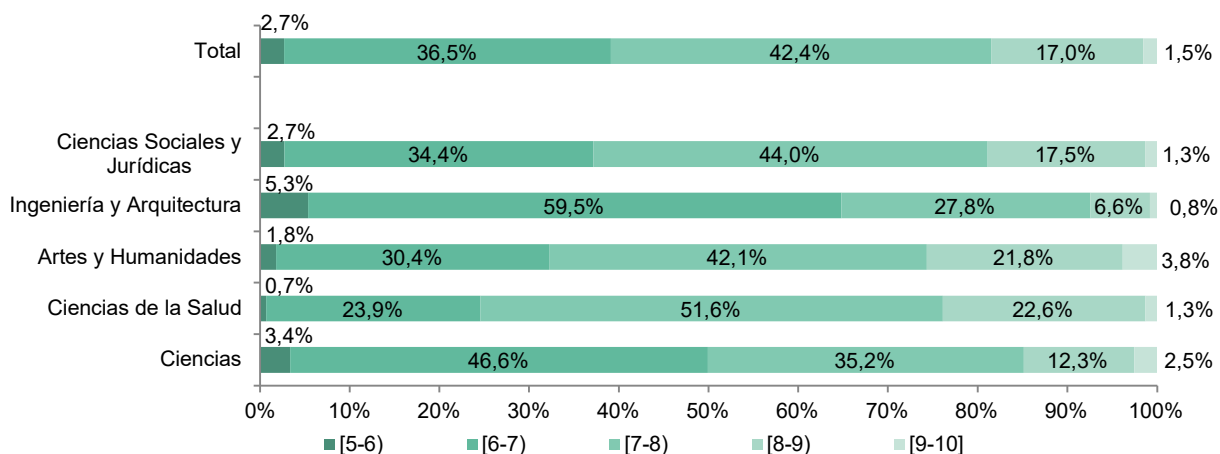

**Gráfico 5.5.2** Nota media del expediente académico de los estudiantes egresados de Grado por modalidad de la universidad. Curso 2019-2020

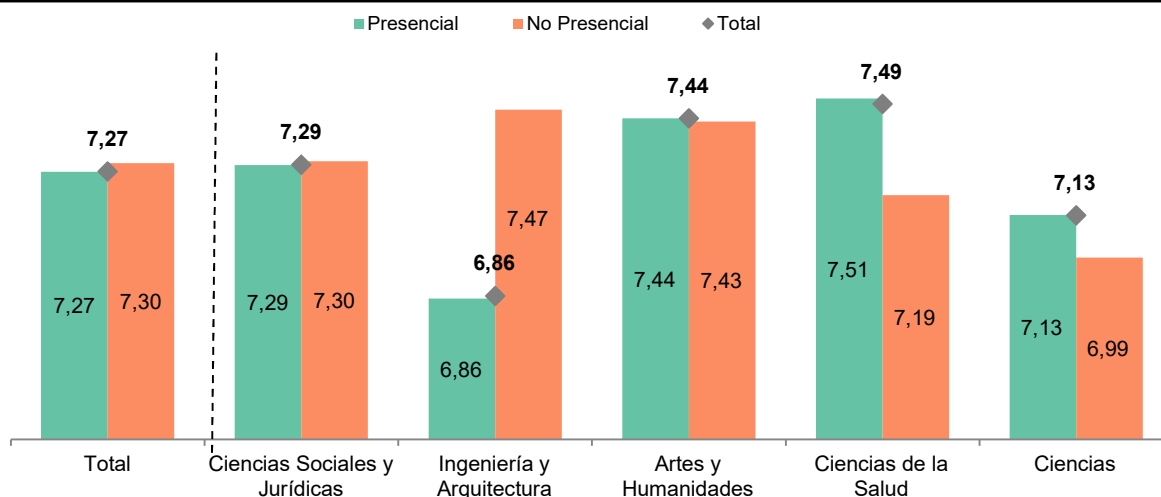

**Tabla 5.5.3** Media y cuartiles de la nota del expediente de los estudiantes egresados de Grado por rama de enseñanza y tipo de universidad. Curso 2019-2020

|                           | Total universidades |                |                | Univ. públicas |                |                | Univ. privadas |                |                |
|---------------------------|---------------------|----------------|----------------|----------------|----------------|----------------|----------------|----------------|----------------|
|                           | Nota media          | Primer cuartil | Tercer cuartil | Nota media     | Primer cuartil | Tercer cuartil | Nota media     | Primer cuartil | Tercer cuartil |
| Total                     | 7,27                | 6,68           | 7,80           | 7,24           | 6,65           | 7,78           | 7,39           | 6,85           | 7,92           |
| <b>Rama de enseñanza</b>  |                     |                |                |                |                |                |                |                |                |
| C. Sociales y Jurídicas   | 7,29                | 6,71           | 7,82           | 7,24           | 6,67           | 7,78           | 7,48           | 6,93           | 8,02           |
| Ingeniería y Arquitectura | 6,86                | 6,39           | 7,22           | 6,85           | 6,38           | 7,20           | 7,01           | 6,41           | 7,54           |
| Artes y Humanidades       | 7,44                | 6,81           | 8,00           | 7,43           | 6,8            | 8,00           | 7,58           | 7,02           | 8,14           |
| Ciencias de la Salud      | 7,49                | 7,00           | 7,97           | 7,54           | 7,06           | 8,02           | 7,32           | 6,84           | 7,76           |
| Ciencias                  | 7,13                | 6,53           | 7,61           | 7,12           | 6,52           | 7,61           | 7,28           | 6,76           | 7,75           |

## 5.5 Indicadores de Grado. Nota del expediente

**Tabla y gráfico 5.5.4** Media y cuartiles de la nota del expediente académico de los estudiantes egresados de Grado por ámbito de estudio. Curso 2019-2020

|                                                                  | Nota media del expediente académico | Cuartiles de la nota de expediente |                |
|------------------------------------------------------------------|-------------------------------------|------------------------------------|----------------|
|                                                                  |                                     | Primer cuartil                     | Tercer cuartil |
| <b>Total</b>                                                     | <b>7,27</b>                         | <b>6,68</b>                        | <b>7,80</b>    |
| <b>Ámbito de estudio</b>                                         |                                     |                                    |                |
| <b>Total Educación</b>                                           | <b>7,69</b>                         | <b>7,26</b>                        | <b>8,13</b>    |
| Formación de docentes de enseñanza infantil                      | 7,77                                | 7,38                               | 8,16           |
| Formación de docentes de enseñanza primaria                      | 7,69                                | 7,22                               | 8,15           |
| Otra Formación de personal docente y ccs de la edu.              | 7,54                                | 7,10                               | 7,96           |
| <b>Total Artes y humanidades</b>                                 | <b>7,45</b>                         | <b>6,85</b>                        | <b>7,99</b>    |
| Técnicas audiovisuales y medios de comunicación                  | 7,49                                | 7,01                               | 7,93           |
| Artes                                                            | 7,51                                | 6,97                               | 8,00           |
| Lenguas                                                          | 7,44                                | 6,80                               | 8,02           |
| Humanidades                                                      | 7,33                                | 6,66                               | 7,90           |
| <b>Total Ciencias sociales, periodismo y documentación</b>       | <b>7,28</b>                         | <b>6,73</b>                        | <b>7,78</b>    |
| Psicología                                                       | 7,36                                | 6,89                               | 7,80           |
| Economía                                                         | 6,84                                | 6,26                               | 7,29           |
| Otras Ciencias sociales y del comportamiento                     | 7,38                                | 6,84                               | 7,89           |
| Periodismo e información                                         | 7,32                                | 6,81                               | 7,80           |
| <b>Total Negocios, administración y derecho</b>                  | <b>6,99</b>                         | <b>6,44</b>                        | <b>7,44</b>    |
| Administración y gestión de empresas                             | 6,93                                | 6,40                               | 7,36           |
| Otra Educación comercial y empresarial                           | 7,10                                | 6,58                               | 7,56           |
| Derecho                                                          | 7,01                                | 6,43                               | 7,48           |
| <b>Total Ciencias</b>                                            | <b>7,16</b>                         | <b>6,54</b>                        | <b>7,67</b>    |
| Ciencias de la vida                                              | 7,27                                | 6,68                               | 7,78           |
| Ciencias Físicas, químicas, geológicas                           | 7,02                                | 6,43                               | 7,45           |
| Matemáticas y Estadística                                        | 7,06                                | 6,39                               | 7,59           |
| <b>Total Informática</b>                                         | <b>7,15</b>                         | <b>6,64</b>                        | <b>7,56</b>    |
| Informática                                                      | 7,15                                | 6,64                               | 7,56           |
| <b>Total Ingeniería, industria y construcción</b>                | <b>6,79</b>                         | <b>6,34</b>                        | <b>7,11</b>    |
| Ingenierías                                                      | 6,82                                | 6,37                               | 7,14           |
| Arquitectura y construcción                                      | 6,68                                | 6,24                               | 7,01           |
| <b>Total Agricultura, ganadería, silvicultura, pesca, y vet.</b> | <b>6,86</b>                         | <b>6,39</b>                        | <b>7,25</b>    |
| Agricultura, ganadería y pesca                                   | 6,68                                | 6,30                               | 6,98           |
| Veterinaria                                                      | 7,02                                | 6,52                               | 7,42           |
| <b>Total Salud y servicios sociales</b>                          | <b>7,52</b>                         | <b>7,05</b>                        | <b>8,00</b>    |
| Medicina                                                         | 7,70                                | 7,24                               | 8,15           |
| Enfermería y atención a enfermos                                 | 7,83                                | 7,47                               | 8,20           |
| Otras ciencias de la Salud                                       | 7,28                                | 6,80                               | 7,72           |
| Trabajo social y orientación                                     | 7,27                                | 6,84                               | 7,67           |
| <b>Total Servicios</b>                                           | <b>7,17</b>                         | <b>6,69</b>                        | <b>7,60</b>    |
| Deportes                                                         | 7,30                                | 6,84                               | 7,73           |
| Turismo y Hostelería                                             | 7,02                                | 6,55                               | 7,42           |
| Otros Servicios                                                  | 7,22                                | 6,69                               | 7,70           |

## 5.6 Indicadores de Grado. Idoneidad, graduación y duración

**Tabla 5.6.1** Tasas de idoneidad (cohorte 2016-2017) y graduación (cohorte 2015-2016) en estudios de Grado de 4 años de duración por tipo de universidad.

|                                         | Total             |                    | Univ. públicas    |                    | Univ. Privadas    |                    |
|-----------------------------------------|-------------------|--------------------|-------------------|--------------------|-------------------|--------------------|
|                                         | Tasa de idoneidad | Tasa de graduación | Tasa de idoneidad | Tasa de graduación | Tasa de idoneidad | Tasa de graduación |
| <b>Total</b>                            | <b>38,3%</b>      | <b>50,2%</b>       | <b>37,0%</b>      | <b>50,6%</b>       | <b>49,7%</b>      | <b>63,4%</b>       |
| <b>Presencialidad de la universidad</b> |                   |                    |                   |                    |                   |                    |
| Univ. presenciales                      | 39,6%             | 52,0%              | 38,2%             | 52,4%              | 52,4%             | 65,3%              |
| Univ. no presenciales                   | 7,1%              | 13,2%              | 4,0%              | 9,1%               | 19,4%             | 37,5%              |

**Tabla 5.6.2** Tasas de idoneidad (cohorte 2016-2017) y graduación (cohorte 2015-2016) en estudios de Grado de 4 años de duración por rama de enseñanza y tipo de universidad.

|                               | Total             |                    | Univ. públicas    |                    | Univ. Privadas    |                    |
|-------------------------------|-------------------|--------------------|-------------------|--------------------|-------------------|--------------------|
|                               | Tasa de idoneidad | Tasa de graduación | Tasa de idoneidad | Tasa de graduación | Tasa de idoneidad | Tasa de graduación |
| <b>Total</b>                  | <b>38,3%</b>      | <b>51,8%</b>       | <b>37,0%</b>      | <b>50,6%</b>       | <b>49,7%</b>      | <b>63,4%</b>       |
| <b>Rama de enseñanza</b>      |                   |                    |                   |                    |                   |                    |
| Ciencias Sociales y Jurídicas | 42,0%             | 54,7%              | 41,1%             | 53,9%              | 49,2%             | 62,1%              |
| Ingeniería y Arquitectura     | 17,2%             | 32,9%              | 16,4%             | 31,9%              | 35,5%             | 56,7%              |
| Artes y Humanidades           | 33,0%             | 47,1%              | 32,5%             | 46,6%              | 42,5%             | 56,6%              |
| Ciencias de la Salud          | 59,2%             | 70,3%              | 60,3%             | 70,6%              | 55,4%             | 69,1%              |
| Ciencias                      | 31,4%             | 49,6%              | 30,9%             | 49,5%              | 44,1%             | 53,9%              |

**Gráfico 5.6.3** Duración media de los estudios de Grado (en años) según su duración teórica por rama de enseñanza. Cohorte de egresados 2019-2020

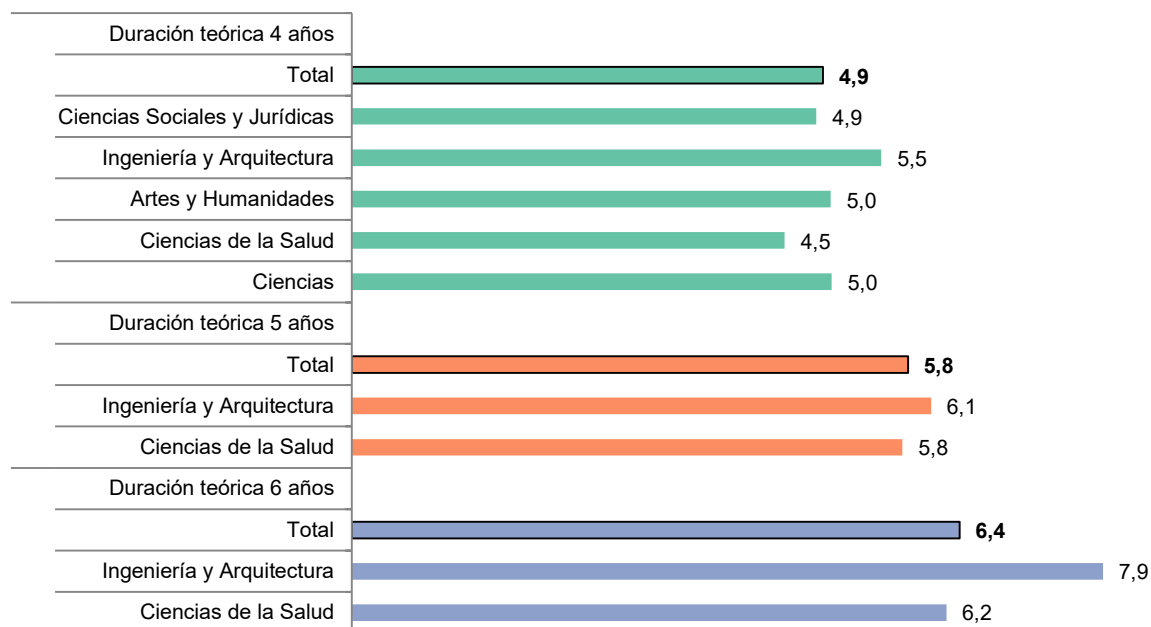

## 5.6 Indicadores de Grado. Idoneidad, graduación y duración

**Tabla 5.6.4** Duración media de los estudios de Grado (en años) según su duración teórica por ámbito de estudio y sexo. Cohorte de egresados 2019-2020

|                                                                  | 4 años de duración teórica |            |            | 5 años de duración teórica |            |            |
|------------------------------------------------------------------|----------------------------|------------|------------|----------------------------|------------|------------|
|                                                                  | Total                      | Hombres    | Mujeres    | Total                      | Hombres    | Mujeres    |
| <b>Total</b>                                                     | <b>4,9</b>                 | <b>5,2</b> | <b>4,8</b> | <b>5,8</b>                 | <b>5,9</b> | <b>5,8</b> |
| <b>Total Educación</b>                                           | <b>4,5</b>                 | <b>4,7</b> | <b>4,5</b> | .                          | .          | .          |
| Formación de docentes de enseñanza infantil                      | 4,4                        | 4,6        | 4,4        | .                          | .          | .          |
| Formación de docentes de enseñanza primaria                      | 4,5                        | 4,7        | 4,4        | .                          | .          | .          |
| Otra Formación de personal docente y ciencias de la educación    | 4,8                        | 5,0        | 4,7        | .                          | .          | .          |
| <b>Total Artes y humanidades</b>                                 | <b>5,0</b>                 | <b>5,1</b> | <b>4,9</b> | ..                         | .          | ..         |
| Técnicas audiovisuales y medios de comunicación                  | 4,6                        | 4,7        | 4,5        | .                          | .          | .          |
| Artes                                                            | 5,0                        | 5,1        | 4,9        | .                          | .          | .          |
| Lenguas                                                          | 5,0                        | 5,1        | 4,9        | .                          | .          | .          |
| Humanidades                                                      | 5,2                        | 5,3        | 5,1        | ..                         | .          | ..         |
| <b>Total Ciencias sociales, periodismo y documentación</b>       | <b>5,0</b>                 | <b>5,2</b> | <b>4,9</b> | .                          | .          | .          |
| Psicología                                                       | 5,0                        | 5,4        | 4,9        | .                          | .          | .          |
| Economía                                                         | 5,2                        | 5,3        | 5,1        | .                          | .          | .          |
| Otras Ciencias sociales y del comportamiento                     | 4,9                        | 5,1        | 4,8        | .                          | .          | .          |
| Periodismo e información                                         | 4,8                        | 4,9        | 4,7        | .                          | .          | .          |
| <b>Total Negocios, administración y derecho</b>                  | <b>5,1</b>                 | <b>5,3</b> | <b>5,1</b> | .                          | .          | .          |
| Administración y gestión de empresas                             | 5,2                        | 5,2        | 5,1        | .                          | .          | .          |
| Otra Educación comercial y empresarial                           | 4,9                        | 5,2        | 4,8        | .                          | .          | .          |
| Derecho                                                          | 5,2                        | 5,4        | 5,1        | .                          | .          | .          |
| <b>Total Ciencias</b>                                            | <b>5,0</b>                 | <b>5,1</b> | <b>5,0</b> | .                          | .          | .          |
| Ciencias de la vida                                              | 4,8                        | 4,9        | 4,7        | .                          | .          | .          |
| Ciencias Físicas, químicas, geológicas                           | 5,3                        | 5,2        | 5,3        | .                          | .          | .          |
| Matemáticas y Estadística                                        | 5,2                        | 5,2        | 5,3        | .                          | .          | .          |
| <b>Total Informática</b>                                         | <b>5,4</b>                 | <b>5,4</b> | <b>5,4</b> | .                          | .          | .          |
| Informática                                                      | 5,4                        | 5,4        | 5,4        | .                          | .          | .          |
| <b>Total Ingeniería, industria y construcción</b>                | <b>5,6</b>                 | <b>5,6</b> | <b>5,5</b> | <b>6,1</b>                 | <b>6,2</b> | <b>6,0</b> |
| Ingenierías                                                      | 5,5                        | 5,6        | 5,4        | .                          | .          | .          |
| Arquitectura y construcción                                      | 6,5                        | 6,6        | 6,4        | 6,1                        | 6,2        | 6,0        |
| <b>Total Agricultura, ganadería, silvicultura, pesca, y vet.</b> | <b>5,9</b>                 | <b>6,0</b> | <b>5,7</b> | <b>5,9</b>                 | <b>6,0</b> | <b>5,9</b> |
| Agricultura, ganadería y pesca                                   | 5,9                        | 6,0        | 5,7        | .                          | .          | .          |
| Veterinaria                                                      | .                          | .          | .          | 5,9                        | 6,0        | 5,9        |
| <b>Total Salud y servicios sociales</b>                          | <b>4,4</b>                 | <b>4,5</b> | <b>4,4</b> | <b>5,7</b>                 | <b>5,8</b> | <b>5,7</b> |
| Medicina                                                         | .                          | .          | .          | .                          | .          | .          |
| Enfermería y atención a enfermos                                 | 4,2                        | 4,3        | 4,2        | .                          | .          | .          |
| Otras ciencias de la Salud                                       | 4,4                        | 4,5        | 4,4        | 5,7                        | 5,8        | 5,7        |
| Trabajo social y orientación                                     | 4,8                        | 5,0        | 4,7        | .                          | .          | .          |
| <b>Total Servicios</b>                                           | <b>4,9</b>                 | <b>4,8</b> | <b>4,9</b> | .                          | .          | .          |
| Deportes                                                         | 4,7                        | 4,7        | 4,5        | .                          | .          | .          |
| Turismo y Hostelería                                             | 5,1                        | 5,2        | 5,0        | .                          | .          | .          |
| Otros Servicios                                                  | 4,9                        | 4,9        | 5,0        | .                          | .          | .          |



# 6 Estudiantes de Máster y Doctorado

## ESTUDIANTES DE MÁSTER

En el curso 2020-2021 hubo un total de 242.932 alumnos matriculados en Máster. Se mantuvo la tendencia creciente, siendo el aumento acumulado de los últimos cinco cursos del 42,0%.

Las estudiantes de Máster en universidades privadas alcanzan el 44% de los alumnos, concentrados en su mayor parte en la rama de Ciencias Sociales y Jurídicas, donde superan en número de matriculados a las universidades públicas.

Los porcentajes de mujeres egresadas en cada rama es similar a los estudios de Grado. Siendo una amplia mayoría en Ciencias de la Salud y apenas uno de cada tres estudiantes en Ingeniería y Arquitectura.

**Continúa el aumento del número de matriculados en Máster, especialmente en universidades privadas.**

**La gran mayoría de estudiantes de Doctorado son de universidades públicas. Siendo el 27,5% extranjeros.**

## ESTUDIANTES DE DOCTORADO

Para el curso 2020-2021 un total de 90.426 estudiantes se matricularon en estudios de Doctorado, el 94,2% en una universidad pública. El 27,8% de los matriculados en Doctorado fueron mayores de 40 años. Destaca la mayor concentración de alumnos jóvenes en la rama de Ciencias.

El porcentaje de matriculados en Doctorado extranjeros alcanzó el 27,5%, siendo más de la mitad de América Latina y Caribe y casi uno de cada cuatro de la Unión Europea.

El porcentaje de mujeres y hombres es prácticamente igual en estudios de Doctorado. Para matriculados mayores de 40 años el porcentaje de mujeres es menor (44,4%)

## TESIS DOCTORALES LEÍDAS

En el año 2020 hubo un total de 9.031 tesis leídas. Se siguen produciendo variaciones en los últimos años debido a la extinción de doctorados regulados por normativas previas al RD 99/2011.

Los ámbitos de estudio con mayor número de Tesis son: Ciencias, Ciencias de la salud y Artes y humanidades.

## **Referencias**

[ANEXO I: Definiciones](#)

[Estadística de Estudiantes Universitarios](#)

[Estadística de Rendimiento Académico](#)

[Estadística de Tesis Doctorales](#)

[Sistema Integrado de Información Universitaria \(SIIU\)](#)

## 6.1 Estudiantes de Máster. Transición de Grado a Máster

**Tabla 6.1.1** Tasa de transición de Grado a Máster por tipo de universidad y sexo. Cohorte de egresados en Grado en el curso 2018-2019 que acceden a un Máster en 2019-2020.

|                                | Ambos sexos               |                          | Hombres                   |                          | Mujeres                   |                          |
|--------------------------------|---------------------------|--------------------------|---------------------------|--------------------------|---------------------------|--------------------------|
|                                | Tasa global de transición | En la propia universidad | Tasa global de transición | En la propia universidad | Tasa global de transición | En la propia universidad |
| <b>Total</b>                   | <b>22,9%</b>              | <b>12,2%</b>             | <b>25,6%</b>              | <b>14,8%</b>             | <b>21,0%</b>              | <b>10,4%</b>             |
| <b>Tipo de universidad</b>     |                           |                          |                           |                          |                           |                          |
| Univ. públicas                 | 24,3%                     | 13,0%                    | 27,1%                     | 15,8%                    | 22,4%                     | 11,1%                    |
| Univ. públicas presencial      | 24,6%                     | 13,2%                    | 27,4%                     | 16,0%                    | 22,7%                     | 11,3%                    |
| Univ. públicas no presenciales | 15,4%                     | 7,1%                     | 17,5%                     | 8,9%                     | 13,9%                     | 5,7%                     |
| Univ. privadas                 | 15,8%                     | 8,0%                     | 18,0%                     | 9,9%                     | 14,4%                     | 6,8%                     |
| Univ. privadas presenciales    | 16,7%                     | 8,4%                     | 18,4%                     | 9,9%                     | 15,5%                     | 7,3%                     |
| Univ. privadas no presencial   | 11,6%                     | 6,5%                     | 15,7%                     | 9,5%                     | 9,3%                      | 4,8%                     |

**Tabla 6.1.2** Tasa de transición de estudiantes de Grado a Máster por rama de enseñanza y tipo de universidad. Cohorte de egresados en Grado en el curso 2018-2019 que acceden a un Máster en 2019-2020.

|                               | Total                     |                          | Universidades públicas    |                          | Universidades privadas    |                          |
|-------------------------------|---------------------------|--------------------------|---------------------------|--------------------------|---------------------------|--------------------------|
|                               | Tasa global de transición | En la propia universidad | Tasa global de transición | En la propia universidad | Tasa global de transición | En la propia universidad |
| <b>Total</b>                  | <b>22,9%</b>              | <b>12,2%</b>             | <b>24,3%</b>              | <b>13,0%</b>             | <b>15,8%</b>              | <b>8,0%</b>              |
| <b>Rama de enseñanza</b>      |                           |                          |                           |                          |                           |                          |
| Ciencias Sociales y Jurídicas | 18,3%                     | 8,5%                     | 19,3%                     | 9,0%                     | 14,3%                     | 6,3%                     |
| Ingeniería y Arquitectura     | 32,7%                     | 22,4%                    | 32,8%                     | 22,3%                    | 31,9%                     | 23,1%                    |
| Artes y Humanidades           | 37,3%                     | 21,4%                    | 39,0%                     | 22,6%                    | 13,8%                     | 5,3%                     |
| Ciencias de la Salud          | 12,7%                     | 5,9%                     | 12,7%                     | 5,6%                     | 12,9%                     | 6,9%                     |
| Ciencias                      | 48,8%                     | 24,4%                    | 48,9%                     | 24,7%                    | 45,1%                     | 16,1%                    |

**Tabla y gráfico 6.1.3** Tiempo medio de transición y distribución de los estudiantes según el curso de finalización del Grado que acceden a Máster (en años). Curso 2019-2020.

| Tiempo medio de transición de Grado a Máster (años) | Curso de finalización del Grado |           |           |           |                      |       |
|-----------------------------------------------------|---------------------------------|-----------|-----------|-----------|----------------------|-------|
|                                                     | 2018-2019                       | 2017-2018 | 2016-2017 | 2015-2016 | 2014-2015 o anterior |       |
| Total                                               | 0,91                            | 60,5%     | 17,3%     | 8,4%      | 5,3%                 | 8,5%  |
| C. Sociales y Jurídicas                             | 1,12                            | 52,6%     | 19,9%     | 10,0%     | 6,6%                 | 10,9% |
| Ingeniería y Arquitectura                           | 0,39                            | 81,0%     | 9,9%      | 4,0%      | 2,2%                 | 3,0%  |
| Artes y Humanidades                                 | 0,71                            | 65,5%     | 17,9%     | 6,8%      | 3,7%                 | 6,1%  |
| Ciencias de la Salud                                | 1,04                            | 55,3%     | 18,6%     | 10,2%     | 6,9%                 | 9,0%  |
| Ciencias                                            | 0,34                            | 79,9%     | 12,5%     | 4,2%      | 1,5%                 | 1,9%  |



## 6.2 Estudiantes de Máster. Matriculados

**Tabla 6.2.1** Evolución del número de estudiantes matriculados en Máster por rama de enseñanza y tipo de universidad.

|                               | Curso académico |                |                        |                |                | Tasa de variación |                  |
|-------------------------------|-----------------|----------------|------------------------|----------------|----------------|-------------------|------------------|
|                               | 2015-16         | 2019-20        | 2020-21 <sup>(1)</sup> |                |                | Anual             | 2020-21 /2015-16 |
|                               |                 |                | Total                  | Univ. públicas | Univ. privadas |                   |                  |
| <b>Total</b>                  | <b>171.043</b>  | <b>237.118</b> | <b>242.932</b>         | <b>135.890</b> | <b>107.042</b> | <b>2,5%</b>       | <b>42,0%</b>     |
| <b>Rama de enseñanza</b>      |                 |                |                        |                |                |                   |                  |
| Ciencias Sociales y Jurídicas | 98.813          | 139.646        | 142.409                | 64.034         | 78.375         | 2,0%              | 44,1%            |
| Ingeniería y Arquitectura     | 30.104          | 44.203         | 46.536                 | 35.026         | 11.510         | 5,3%              | 54,6%            |
| Artes y Humanidades           | 15.171          | 18.215         | 18.213                 | 13.847         | 4.366          | 0,0%              | 20,1%            |
| Ciencias de la Salud          | 19.034          | 25.264         | 25.736                 | 13.577         | 12.159         | 1,9%              | 35,2%            |
| Ciencias                      | 7.921           | 9.790          | 10.038                 | 9.406          | 632            | 2,5%              | 26,7%            |

**Gráfico 6.2.2** Evolución del número de estudiantes matriculados en Máster por tipo de universidad. Cursos 2011-2012 a 2020-2021<sup>(1)</sup>.

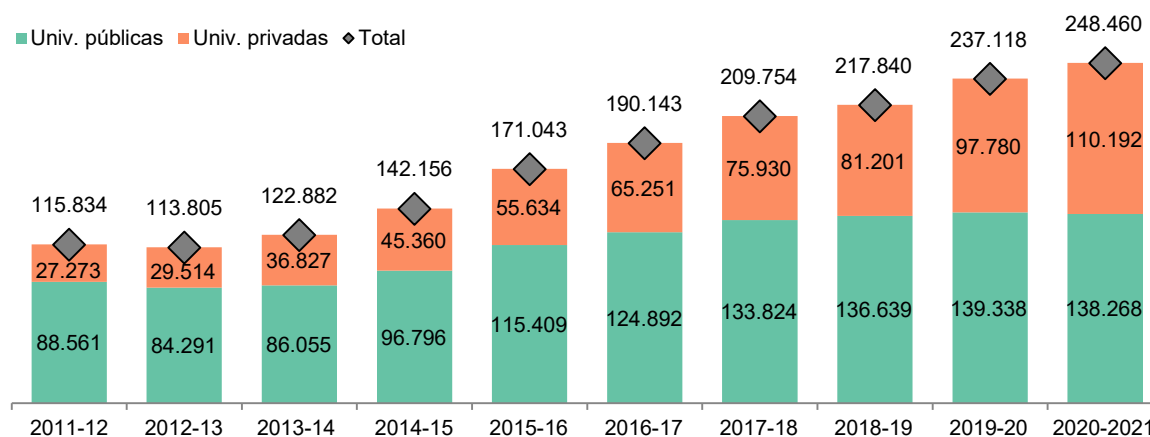

**Gráfico 6.2.3** Distribución del número de estudiantes matriculados en Máster por rama de enseñanza. Cursos 2015-2016 y 2020-2021<sup>(1)</sup>.

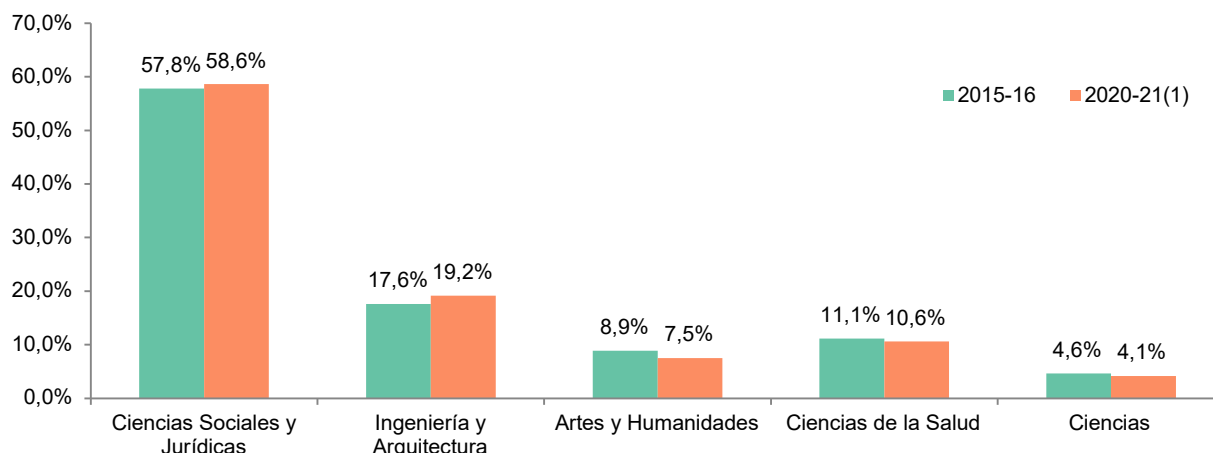

(1) Datos provisionales

### 6.3 Estudiantes de Máster. Egresados

**Tabla 6.3.1** Evolución del número de estudiantes egresados de Máster por rama de enseñanza.

| Rama de enseñanza             | 2014-15       | 2018-19        | 2019-20        |                |                | Tasa variación |                  |
|-------------------------------|---------------|----------------|----------------|----------------|----------------|----------------|------------------|
|                               |               |                | Total          | Univ. públicas | Univ. privadas | Anual          | 2019-20/ 2014-15 |
|                               |               |                |                |                |                |                |                  |
| <b>Total</b>                  | <b>75.097</b> | <b>114.320</b> | <b>131.267</b> | <b>76.256</b>  | <b>55.011</b>  | <b>14,8%</b>   | <b>74,8%</b>     |
| Ciencias Sociales y Jurídicas | 46.383        | 72.145         | 85.373         | 41.276         | 44.097         | 18,3%          | 84,1%            |
| Ingeniería y Arquitectura     | 7.815         | 15.262         | 17.034         | 13.008         | 4.026          | 11,6%          | 118,0%           |
| Artes y Humanidades           | 6.852         | 8.442          | 9.099          | 7.456          | 1.643          | 7,8%           | 32,8%            |
| Ciencias de la Salud          | 8.948         | 12.677         | 13.600         | 8.557          | 5.043          | 7,3%           | 52,0%            |
| Ciencias                      | 5.099         | 5.794          | 6.161          | 5.959          | 202            | 6,3%           | 20,8%            |

**Gráfico 6.3.2** Evolución del número de estudiantes egresados de Máster por tipo de universidad.

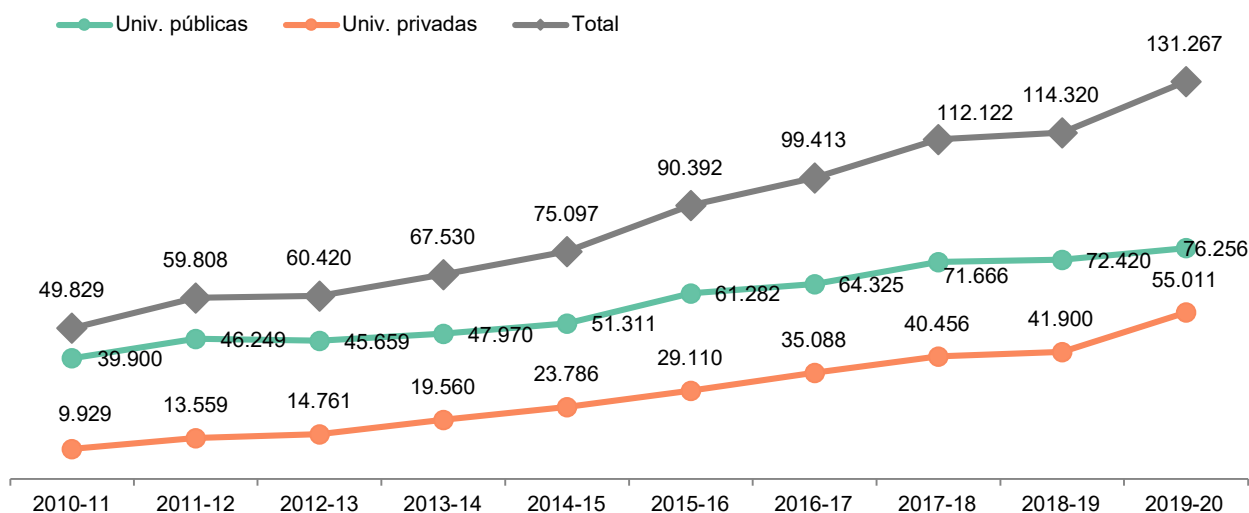

**Gráfico 6.3.3** Evolución del porcentaje de mujeres egresadas en Máster por rama de enseñanza.

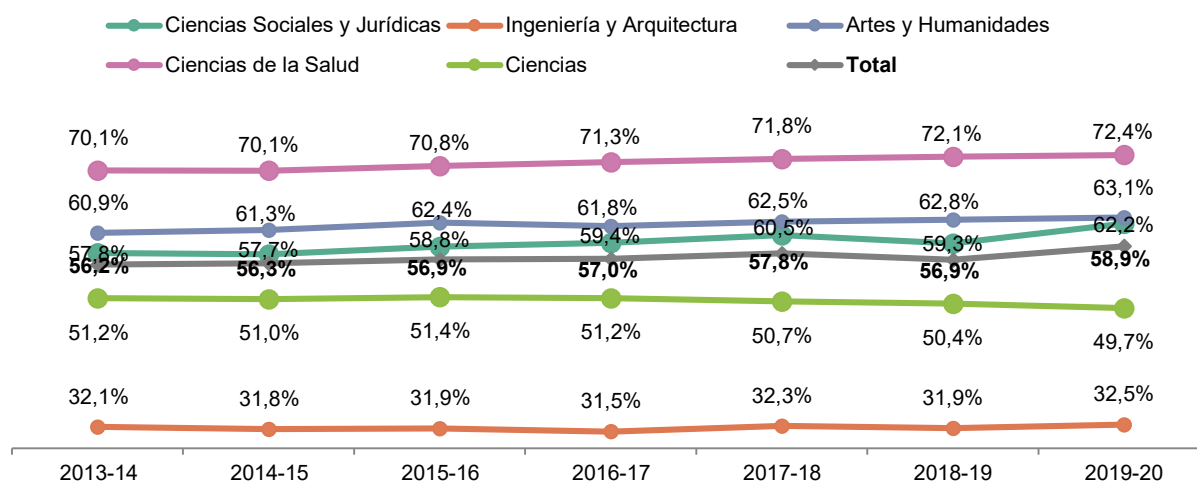

## 6.4 Estudiantes de Doctorado RD 99/2011. Matriculados

**Tabla 6.4.1** Número de estudiantes matriculados en Doctorado RD 99/2011 por rama de enseñanza. Curso 2020-2021<sup>(1)</sup>.

|                              | Total         | %             | Univ. públicas | %            | Univ. privadas | %           |
|------------------------------|---------------|---------------|----------------|--------------|----------------|-------------|
| <b>Total</b>                 | <b>90.426</b> | <b>100,0%</b> | <b>85.137</b>  | <b>94,2%</b> | <b>5.289</b>   | <b>5,8%</b> |
| <b>Rama de enseñanza</b>     |               |               |                |              |                |             |
| Ciencias Sociales y Jurídica | 24.918        | 27,6%         | 22.675         | 91,0%        | 2.243          | 9,0%        |
| Ingeniería y Arquitectura    | 15.020        | 16,6%         | 14.295         | 95,2%        | 725            | 4,8%        |
| Artes y Humanidades          | 14.852        | 16,4%         | 14.473         | 97,4%        | 379            | 2,6%        |
| Ciencias de la Salud         | 22.559        | 24,9%         | 20.833         | 92,3%        | 1.726          | 7,7%        |
| Ciencias                     | 13.077        | 14,5%         | 12.861         | 98,3%        | 216            | 1,7%        |

**Gráfico 6.4.2** Distribución del número de estudiantes matriculados en Doctorado RD 99/2011 por sexo y grupo de edad. Curso 2020-2021<sup>(1)</sup>.

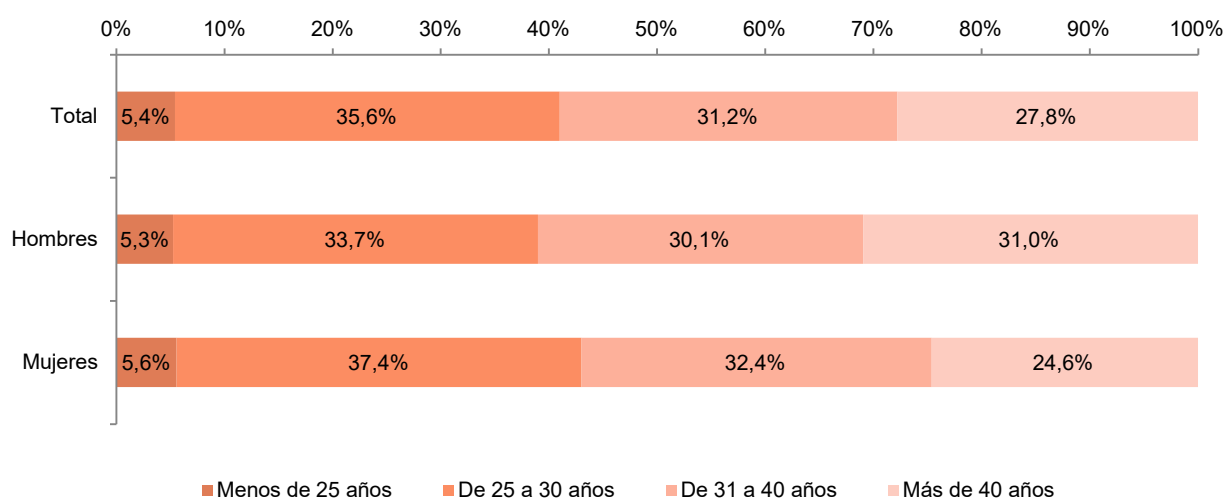

**Gráfico 6.4.3** Distribución del número de estudiantes matriculados en Doctorado RD 99/2011 por región (según su nacionalidad). Curso 2020-2021<sup>(1)</sup>.

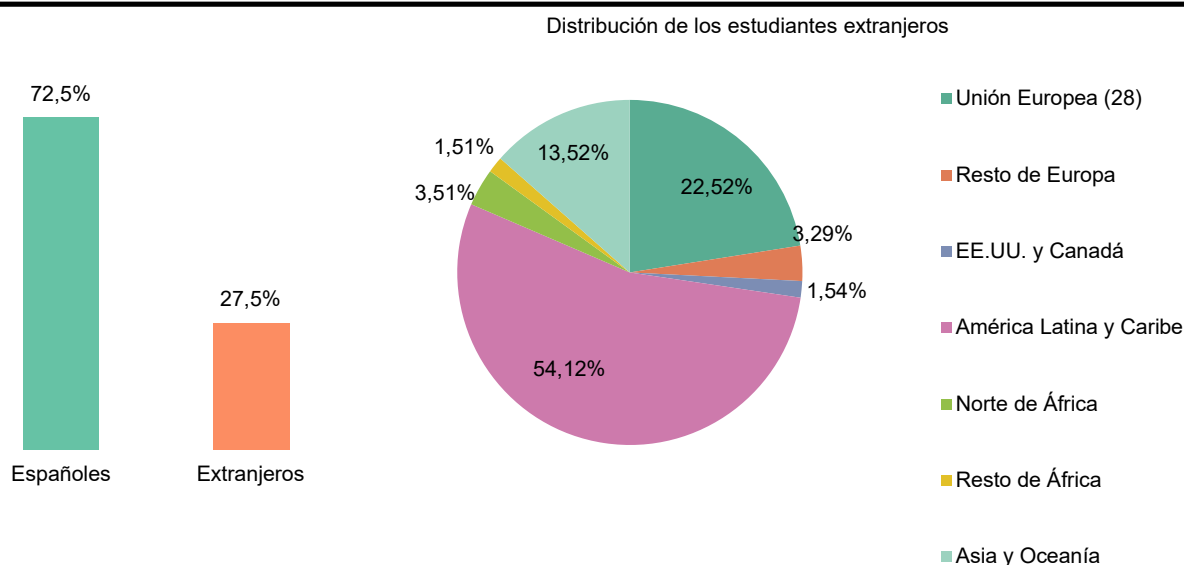

(1) Datos provisionales

## 6.5 Estudiantes de Doctorado RD 99/2011. Egresados

**Tabla 6.5.1** Número de estudiantes egresados en Doctorado RD 99/2011 por ámbito de estudio y tipo y modalidad de la universidad. Curso 2019-2020

| Ámbito de estudio                                                       | Total        | Universidades públicas |                                | Universidades privadas |                                |
|-------------------------------------------------------------------------|--------------|------------------------|--------------------------------|------------------------|--------------------------------|
|                                                                         | Total        | Presenciales           | No presenciales <sup>(1)</sup> | Presenciales           | No presenciales <sup>(1)</sup> |
| <b>Ámbito de estudio</b>                                                | <b>9.353</b> | <b>8.712</b>           | <b>163</b>                     | <b>445</b>             | <b>33</b>                      |
| <b>Total Educación</b>                                                  | <b>462</b>   | <b>408</b>             | <b>17</b>                      | <b>25</b>              | <b>12</b>                      |
| Otra Formación de personal docente y ciencias de la educación           | 462          | 408                    | 17                             | 25                     | 12                             |
| <b>Total Artes y humanidades</b>                                        | <b>1.334</b> | <b>1.242</b>           | <b>51</b>                      | <b>41</b>              | .                              |
| Técnicas audiovisuales y medios de comunicación                         | 42           | 42                     | .                              | .                      | .                              |
| Artes                                                                   | 194          | 185                    | .                              | 9                      | .                              |
| Lenguas                                                                 | 391          | 370                    | 16                             | 5                      | .                              |
| Humanidades                                                             | 707          | 645                    | 35                             | 27                     | .                              |
| <b>Total Ciencias sociales, periodismo y documentación</b>              | <b>1.164</b> | <b>1.007</b>           | <b>50</b>                      | <b>97</b>              | <b>10</b>                      |
| Psicología                                                              | 279          | 244                    | 12                             | 23                     | .                              |
| Economía                                                                | 197          | 179                    | 11                             | 7                      | .                              |
| Otras Ciencias sociales y del comportamiento                            | 524          | 442                    | 27                             | 45                     | 10                             |
| Periodismo e información                                                | 164          | 142                    | .                              | 22                     | .                              |
| <b>Total Negocios, administración y derecho</b>                         | <b>529</b>   | <b>479</b>             | <b>14</b>                      | <b>28</b>              | <b>8</b>                       |
| Administración y gestión de empresas                                    | 113          | 94                     | .                              | 19                     | .                              |
| Otra Educación comercial y empresarial                                  | 49           | 49                     | .                              | .                      | .                              |
| Derecho                                                                 | 367          | 336                    | 14                             | 9                      | 8                              |
| <b>Total Ciencias</b>                                                   | <b>2.333</b> | <b>2.287</b>           | <b>13</b>                      | <b>33</b>              | .                              |
| Ciencias de la vida                                                     | 1.212        | 1.194                  | .                              | 18                     | .                              |
| Ciencias Físicas, químicas, geológicas                                  | 959          | 935                    | 13                             | 11                     | .                              |
| Matemáticas y Estadística                                               | 162          | 158                    | .                              | 4                      | .                              |
| <b>Total Informática</b>                                                | <b>255</b>   | <b>249</b>             | <b>3</b>                       | .                      | <b>3</b>                       |
| Informática                                                             | 255          | 249                    | 3                              | .                      | 3                              |
| <b>Total Ingeniería, industria y construcción</b>                       | <b>1.284</b> | <b>1.192</b>           | <b>15</b>                      | <b>77</b>              | .                              |
| Ingenierías                                                             | 1.055        | 981                    | 15                             | 59                     | .                              |
| Arquitectura y construcción                                             | 229          | 211                    | .                              | 18                     | .                              |
| <b>Total Agricultura, ganadería, silvicultura, pesca, y veterinaria</b> | <b>279</b>   | <b>279</b>             | .                              | .                      | .                              |
| Agricultura, ganadería y pesca                                          | 234          | 234                    | .                              | .                      | .                              |
| Veterinaria                                                             | 45           | 45                     | .                              | .                      | .                              |
| <b>Total Salud y servicios sociales</b>                                 | <b>1.580</b> | <b>1.452</b>           | .                              | <b>128</b>             | .                              |
| Medicina                                                                | 500          | 465                    | .                              | 35                     | .                              |
| Enfermería y atención a enfermos                                        | 34           | 33                     | .                              | 1                      | .                              |
| Otras ciencias de la Salud                                              | 1.033        | 941                    | .                              | 92                     | .                              |
| Trabajo social y orientación                                            | 13           | 13                     | .                              | .                      | .                              |
| <b>Total Servicios</b>                                                  | <b>133</b>   | <b>117</b>             | .                              | <b>16</b>              | .                              |
| Deportes                                                                | 96           | 83                     | .                              | 13                     | .                              |
| Turismo y Hostelería                                                    | 29           | 26                     | .                              | 3                      | .                              |
| Otros Servicios                                                         | 8            | 8                      | .                              | .                      | .                              |

(1) Se han incluido las universidades especiales en la categoría de no presenciales.

## 6.6 Tesis Doctorales leídas

**Tabla 6.6.1** Evolución del número de tesis doctorales leídas, por año y sexo.

|              | 2020         |               | 2019          |              | 2018         |               | 2017          | 2016          | 2015          |
|--------------|--------------|---------------|---------------|--------------|--------------|---------------|---------------|---------------|---------------|
|              | Total        | TV anual (%)  | Total         | TV anual (%) | Total        | TV anual (%)  | Total         | Total         | Total         |
| <b>Total</b> | <b>9.031</b> | <b>-11,2%</b> | <b>10.165</b> | <b>19,8%</b> | <b>8.483</b> | <b>-50,9%</b> | <b>17.286</b> | <b>20.049</b> | <b>14.694</b> |
| Hombres      | 4.692        | -7,3%         | 5.059         | 18,8%        | 4.260        | -48,0%        | 8.193         | 9.945         | 7.231         |
| Mujeres      | 4.339        | -15,0%        | 5.106         | 20,9%        | 4.223        | -53,6%        | 9.093         | 10.104        | 7.463         |

**Gráfico 6.6.2** Distribución del número de tesis doctorales leídas, por sexo y grupo de edad. Año 2020.

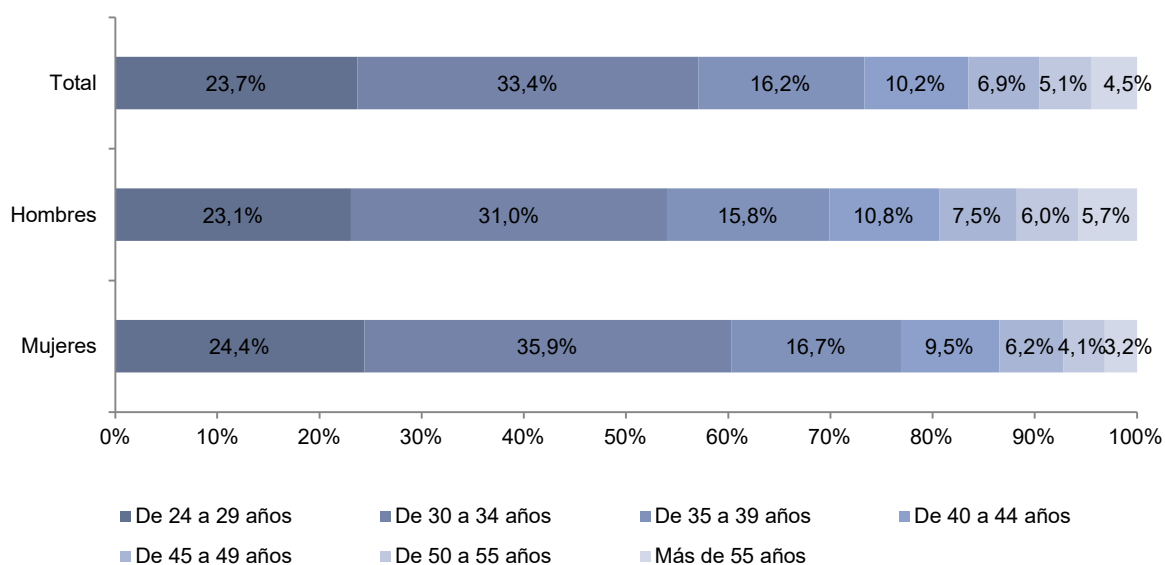

**Gráfico 6.6.3** Distribución del número de tesis doctorales leídas por extranjeros, por región de procedencia. Año 2020.

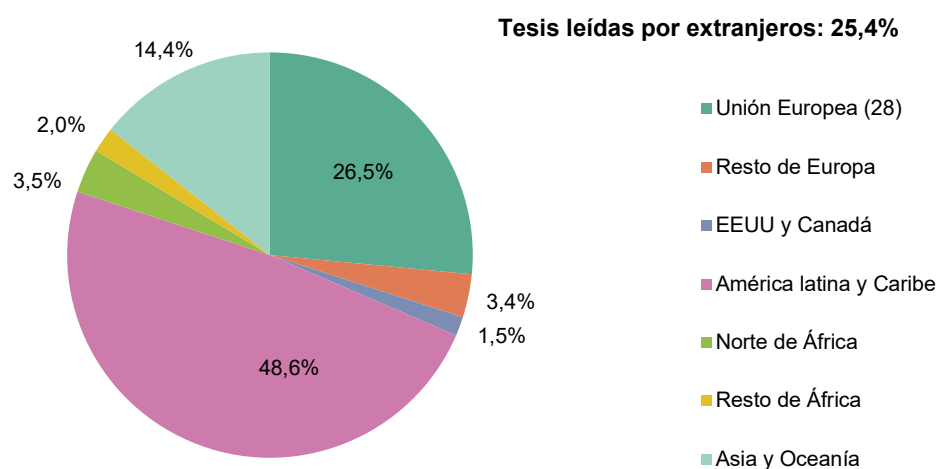

## 6.7 Perfil de los estudiantes de Máster y Doctorado

**Tabla 6.7.1** Número de estudiantes de Máster y Doctorado RD 99/2011 por grupo de edad.

|                   | Máster                              |              |                   |              | Doctorado RD 99/2011                |              |                   |              |
|-------------------|-------------------------------------|--------------|-------------------|--------------|-------------------------------------|--------------|-------------------|--------------|
|                   | Matriculados 2020-21 <sup>(1)</sup> |              | Egresados 2019-20 |              | Matriculados 2020-21 <sup>(1)</sup> |              | Egresados 2019-20 |              |
|                   | Total                               | % Mujeres    | Total             | % Mujeres    | Total                               | % Mujeres    | Total             | % Mujeres    |
| Total estudiantes | <b>248.460</b>                      | <b>55,4%</b> | <b>131.267</b>    | <b>58,9%</b> | <b>90.426</b>                       | <b>50,1%</b> | <b>9.353</b>      | <b>48,6%</b> |
| Menos de 25 años  | 81.039                              | 57,6%        | 43.730            | 61,2%        | 4.899                               | 51,7%        | 7                 | 42,9%        |
| De 25 a 30 años   | 88.955                              | 56,1%        | 49.791            | 59,1%        | 32.175                              | 52,7%        | 3.718             | 50,4%        |
| De 31 a 40 años   | 49.796                              | 54,3%        | 25.572            | 56,9%        | 28.223                              | 52,0%        | 3.580             | 50,3%        |
| Más de 40 años    | 28.670                              | 49,4%        | 12.174            | 53,7%        | 25.129                              | 44,4%        | 2.048             | 42,3%        |

**Gráfico 6.7.2** Tasas de variación del número de estudiantes de Máster por grupo de edad.

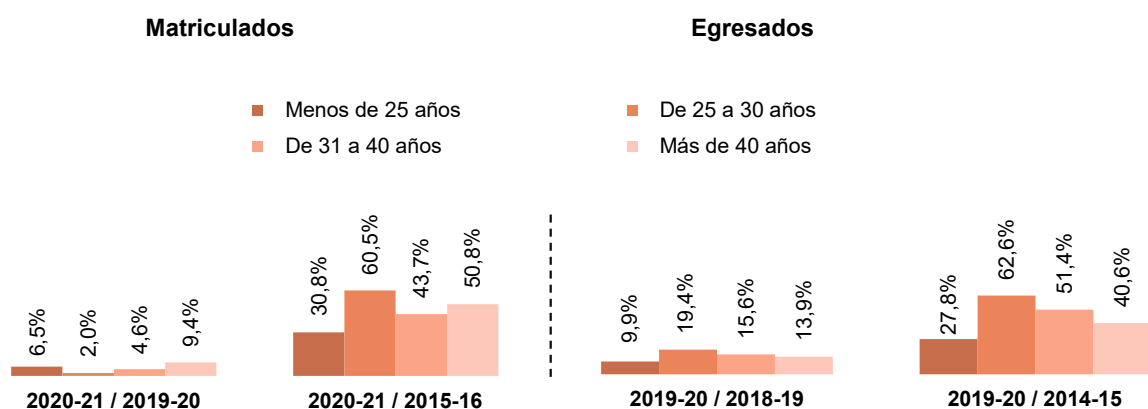

**Gráfico 6.7.3** Distribución del número de estudiantes matriculados en Máster por grupo de edad y rama de enseñanza. Curso 2020-2021<sup>(1)</sup>.

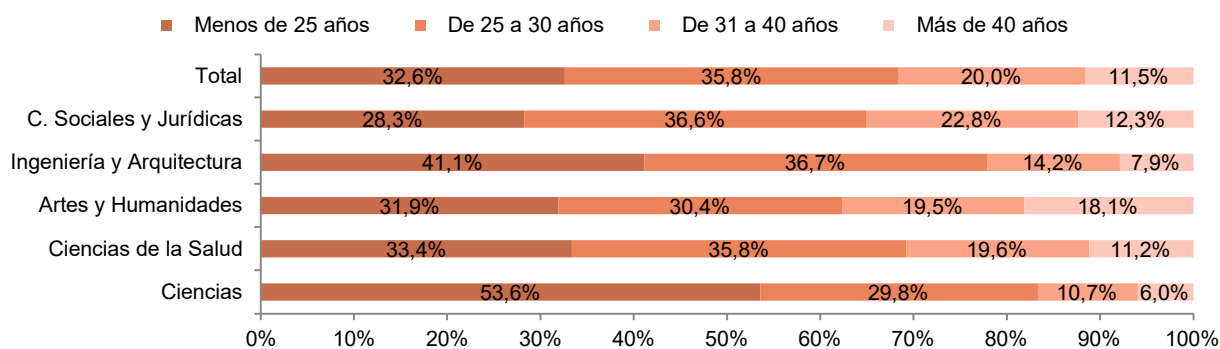

**Gráfico 6.7.4** Distribución del número de estudiantes de Doctorado regulado por RD 99/2011 por grupo de edad y rama de enseñanza. Curso 2020-2021<sup>(1)</sup>.

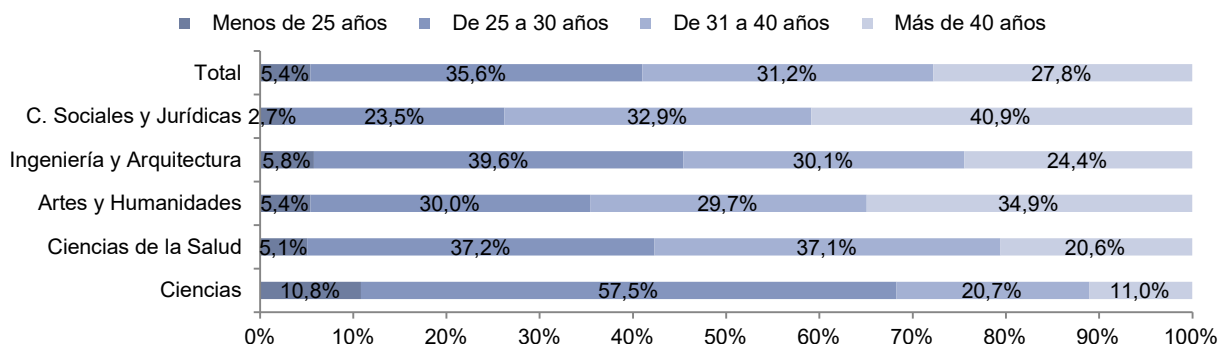

(1) Datos provisionales

# 7 Indicadores de Máster

## TASA DE RENDIMIENTO

La tasa de rendimiento de los alumnos matriculados en Máster en el curso 2019-2020 fue de 91%, notablemente superior a la de Grado y con menos variabilidad en las distintas ramas, aunque con resultados ligeramente inferiores en Ingeniería y arquitectura y en Artes y humanidades.

**El 84,5% de los estudiantes de Máster de 1 año de duración se graduó como máximo en un curso adicional.**

## ABANDONO Y CAMBIO DEL ESTUDIO

Abandonaron los estudios de máster el 15,7% de los matriculados de nuevo ingreso, aunque el 1,8% fue para cambiar a otro Máster. Las tasas son sensiblemente mayores en las universidades no presenciales y en las ramas de Ingeniería y arquitectura y en Artes y humanidades.

**Tres de cada cuatro alumnos egresados de Máster obtuvieron notas de expediente superiores a un 7,72**

## NOTA DE EXPEDIENTE DE EGRESADOS

La nota media del expediente de los estudiantes que egresaron en el curso 2019-2020 en estudios de Máster fue de 8,19, casi un punto por encima de la nota media del expediente de los egresados en Grado (7,27). Tres de cada cuatro alumnos egresados de Máster obtuvieron notas de expediente superiores a un 7,72.

## IDONEIDAD, GRADUACIÓN y DURACIÓN

El 75,5% de los estudiantes de nuevo ingreso en estudios de Máster de 1 año teórico de duración se graduó ese mismo año. Llegando a un 84,5% los que acaban en un curso adicional.

Así mismo, los estudiantes egresados en 2019-2020 en una titulación de Máster de 1 año teórico de duración tardaron una media de 1,37 años en finalizar sus estudios. Los de 2 años teóricos de duración tardaron 2,21 años de media.

## Referencias

[ANEXO I: Definiciones](#)

[Estadística de Rendimiento Académico](#)

[Sistema Integrado de Información Universitaria \(SIIU\)](#)

## 7.1 Indicadores de Máster. Principales indicadores

**Tabla 7.1.1** Últimos valores disponibles de los principales indicadores académicos de los estudiantes de Máster por tipo de universidad y rama de enseñanza

|                                                                                            |              | Total       | C. Sociales y Jurídicas | Ingeniería y Arquitectura | Artes y Humanidades | Ciencias de la Salud | Ciencias    |
|--------------------------------------------------------------------------------------------|--------------|-------------|-------------------------|---------------------------|---------------------|----------------------|-------------|
| Número medio de créditos matriculados 2019-20                                              | <b>Total</b> | <b>44,2</b> | <b>45,4</b>             | <b>41,1</b>               | <b>39,6</b>         | <b>45,0</b>          | <b>47,9</b> |
|                                                                                            | U. públicas  | 44,7        | 45,6                    | 42,5                      | 40,8                | 47,0                 | 48,1        |
|                                                                                            | U. privadas  | 43,6        | 45,3                    | 37,0                      | 35,5                | 42,3                 | 43,4        |
| Número medio de créditos presentados 2019-20                                               | <b>Total</b> | <b>40,8</b> | <b>42,5</b>             | <b>36,8</b>               | <b>34,8</b>         | <b>41,8</b>          | <b>44,0</b> |
|                                                                                            | U. públicas  | 40,9        | 42,4                    | 37,9                      | 35,4                | 43,7                 | 44,4        |
|                                                                                            | U. privadas  | 40,7        | 42,5                    | 33,3                      | 32,6                | 39,3                 | 37,4        |
| Número medio de créditos aprobados 2019-20                                                 | <b>Total</b> | <b>40,2</b> | <b>42,0</b>             | <b>35,7</b>               | <b>34,3</b>         | <b>41,3</b>          | <b>43,5</b> |
|                                                                                            | U. públicas  | 40,3        | 42,0                    | 36,9                      | 35,0                | 43,4                 | 44,0        |
|                                                                                            | U. privadas  | 40,1        | 42,0                    | 32,1                      | 32,1                | 38,7                 | 35,5        |
| Tasa de rendimiento 2019-20 (%)                                                            | <b>Total</b> | <b>91,0</b> | <b>92,5</b>             | <b>86,8</b>               | <b>86,6</b>         | <b>91,9</b>          | <b>91,9</b> |
|                                                                                            | U. públicas  | 90,3        | 92,1                    | 86,8                      | 85,8                | 92,3                 | 91,4        |
|                                                                                            | U. privadas  | 92,0        | 92,8                    | 86,9                      | 90,3                | 91,4                 | 81,7        |
| Abandono del estudio en 1º año. Cohorte de nuevo ingreso 2017-18 (%)                       | <b>Total</b> | <b>9,8</b>  | <b>9,0</b>              | <b>12,7</b>               | <b>13,0</b>         | <b>8,8</b>           | <b>8,7</b>  |
|                                                                                            | U. públicas  | 8,8         | 7,7                     | 11,3                      | 12,4                | 7,3                  | 8,1         |
|                                                                                            | U. privadas  | 11,4        | 10,5                    | 18,0                      | 15,8                | 11,7                 | 21,6        |
| Cambio de estudio en 1º año. Cohorte de nuevo ingreso 2017-18 (%)                          | <b>Total</b> | <b>1,2</b>  | <b>0,9</b>              | <b>1,8</b>                | <b>2,3</b>          | <b>1,2</b>           | <b>1,2</b>  |
|                                                                                            | U. públicas  | 1,3         | 0,9                     | 1,8                       | 2,3                 | 1,2                  | 1,2         |
|                                                                                            | U. privadas  | 1,1         | 0,9                     | 1,8                       | 2,0                 | 1,2                  | 1,7         |
| Tasa de idoneidad. Cohorte de nuevo ingreso 2019-20 (%). Máster de 1 año                   | <b>Total</b> | <b>75,5</b> | <b>78,3</b>             | <b>60,0</b>               | <b>64,2</b>         | <b>76,4</b>          | <b>79,8</b> |
|                                                                                            | U. públicas  | 73,7        | 76,1                    | 59,7                      | 62,9                | 80,4                 | 80,3        |
|                                                                                            | U. privadas  | 77,9        | 80,3                    | 60,8                      | 70,6                | 68,0                 | 60,3        |
| Tasa de graduación. Cohorte de nuevo ingreso 2018-19 (%). Máster de 1 año                  | <b>Total</b> | <b>84,5</b> | <b>85,5</b>             | <b>76,2</b>               | <b>78,3</b>         | <b>87,9</b>          | <b>88,6</b> |
|                                                                                            | U. públicas  | 84,1        | 84,5                    | 77,4                      | 78,4                | 89,4                 | 89,8        |
|                                                                                            | U. privadas  | 85,2        | 86,8                    | 73,2                      | 77,5                | 84,4                 | 52,3        |
| Tasa de eficiencia. Cohorte de egresados 2019-20 (%)                                       | <b>Total</b> | <b>96,3</b> | <b>97,2</b>             | <b>93,4</b>               | <b>93,5</b>         | <b>97,4</b>          | <b>96,7</b> |
|                                                                                            | U. públicas  | 95,7        | 96,7                    | 93,2                      | 93,1                | 97,1                 | 97,0        |
|                                                                                            | U. privadas  | 97,2        | 97,6                    | 94,2                      | 95,3                | 97,9                 | 89,5        |
| Duración media de estudios de Máster. Cohorte de egresados 2019-20 (años). Máster de 1 año | <b>Total</b> | <b>1,37</b> | <b>1,33</b>             | <b>1,59</b>               | <b>1,57</b>         | <b>1,32</b>          | <b>1,28</b> |
|                                                                                            | U. públicas  | 1,38        | 1,36                    | 1,57                      | 1,57                | 1,24                 | 1,27        |
|                                                                                            | U. privadas  | 1,34        | 1,30                    | 1,63                      | 1,58                | 1,47                 | 1,56        |
| Nota media del expediente. Cohorte de egresados 2019-20                                    | <b>Total</b> | <b>8,19</b> | <b>8,18</b>             | <b>7,94</b>               | <b>8,38</b>         | <b>8,39</b>          | <b>8,36</b> |
|                                                                                            | U. públicas  | 8,23        | 8,23                    | 7,89                      | 8,38                | 8,50                 | 8,37        |
|                                                                                            | U. privadas  | 8,15        | 8,14                    | 8,08                      | 8,40                | 8,19                 | 8,10        |



## 7.1 Indicadores de Máster. Principales indicadores

**Gráfico 7.1.2** Evolución del número medio de créditos matriculados, presentados y superados en Máster

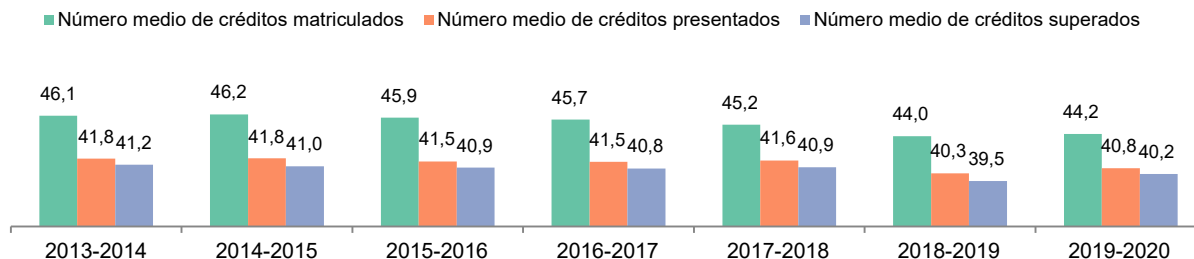

**Gráfico 7.1.3** Evolución de la tasa de rendimiento en Máster por rama de enseñanza

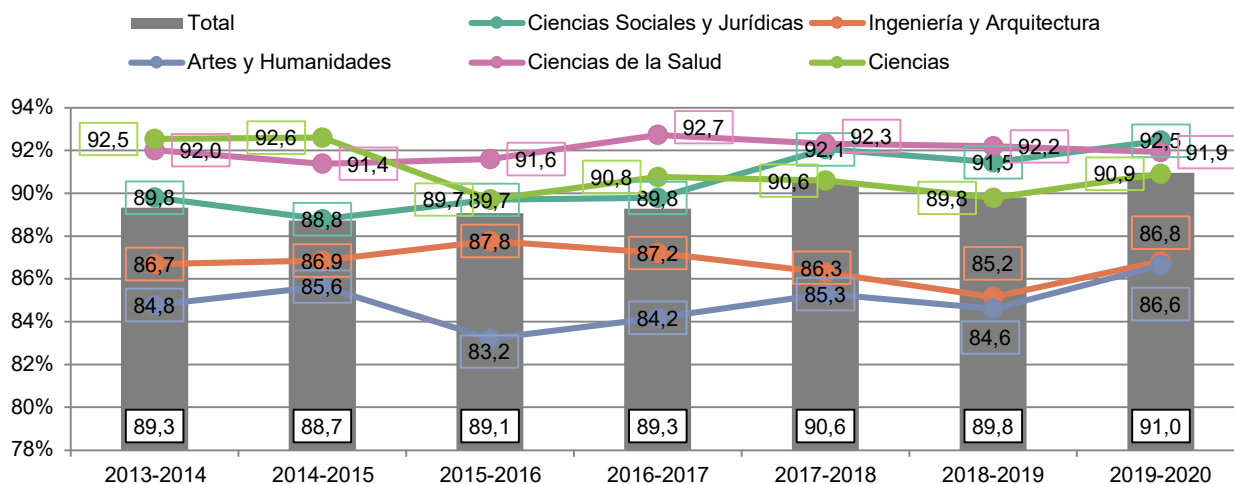

**Tabla 7.1.4** Evolución de las tasas de abandono y cambio de estudio en primer año en Máster por rama de enseñanza

|                               | Cohorte 2015-2016              |                              | Cohorte 2016-2017              |                              | Cohorte 2017-2018              |                              |
|-------------------------------|--------------------------------|------------------------------|--------------------------------|------------------------------|--------------------------------|------------------------------|
|                               | Abandono del estudio en 1º año | Cambio del estudio en 1º año | Abandono del estudio en 1º año | Cambio del estudio en 1º año | Abandono del estudio en 1º año | Cambio del estudio en 1º año |
| <b>Total</b>                  | <b>10,3%</b>                   | <b>1,4%</b>                  | <b>12,3%</b>                   | <b>1,6%</b>                  | <b>9,8%</b>                    | <b>1,2%</b>                  |
| <b>Rama de enseñanza</b>      |                                |                              |                                |                              |                                |                              |
| Ciencias Sociales y Jurídicas | 9,4%                           | 1,2%                         | 12,2%                          | 1,4%                         | 9,0%                           | 0,9%                         |
| Ingeniería y Arquitectura     | 12,0%                          | 1,7%                         | 13,1%                          | 1,7%                         | 12,7%                          | 1,8%                         |
| Artes y Humanidades           | 13,6%                          | 2,2%                         | 16,4%                          | 3,1%                         | 13,0%                          | 2,3%                         |
| Ciencias de la Salud          | 9,3%                           | 1,4%                         | 9,0%                           | 1,2%                         | 8,8%                           | 1,2%                         |
| Ciencias                      | 11,8%                          | 1,6%                         | 11,5%                          | 1,9%                         | 8,7%                           | 1,2%                         |

**Gráfico 7.1.5** Evolución de la nota del expediente académico de los egresados de Máster por rama de enseñanza

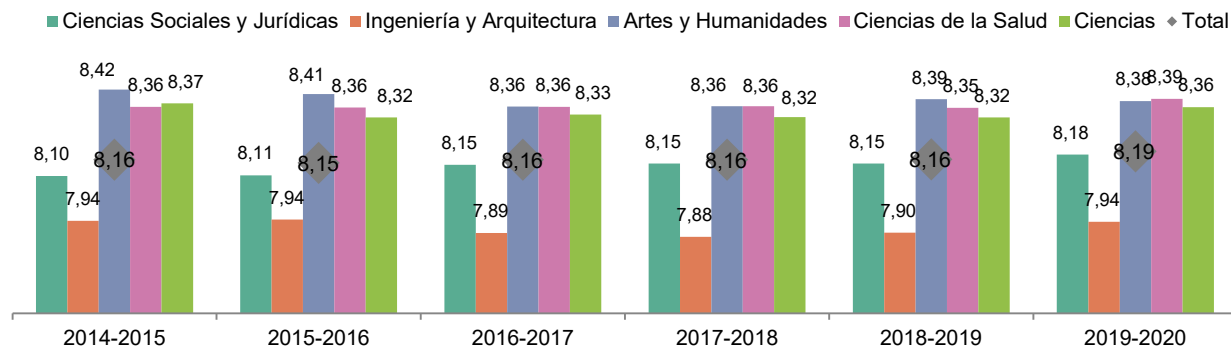

## 7.1 Indicadores de Máster. Principales indicadores

**Tabla 7.1.6** Tasa de rendimiento en Máster por rama de enseñanza y sexo. Curso 2019-2020

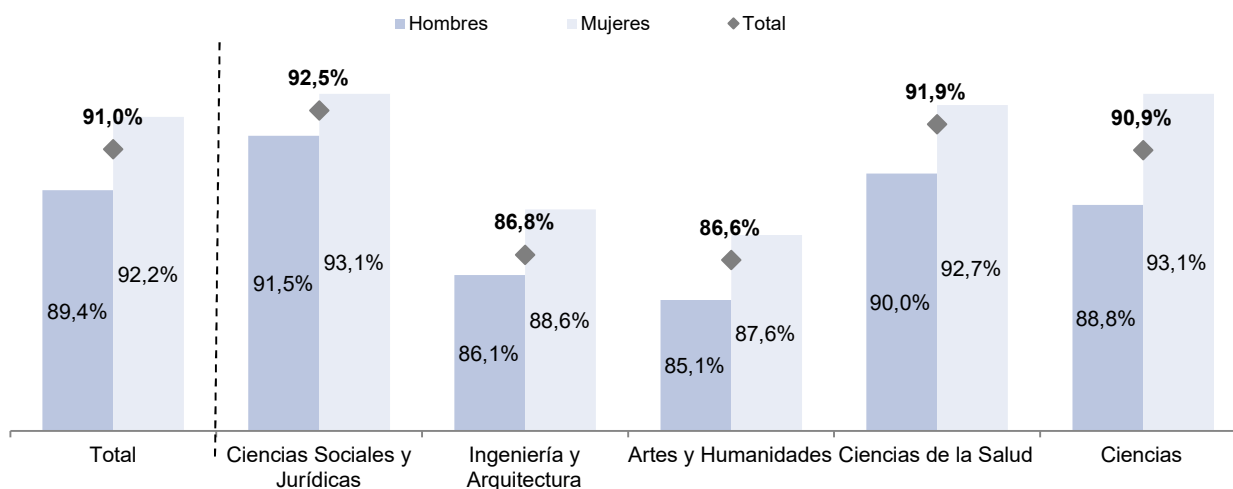

**Tabla 7.1.7** Tasa de abandono y cambio de estudio en Máster el primer año por rama de enseñanza y sexo. Cohorte 2017-20187

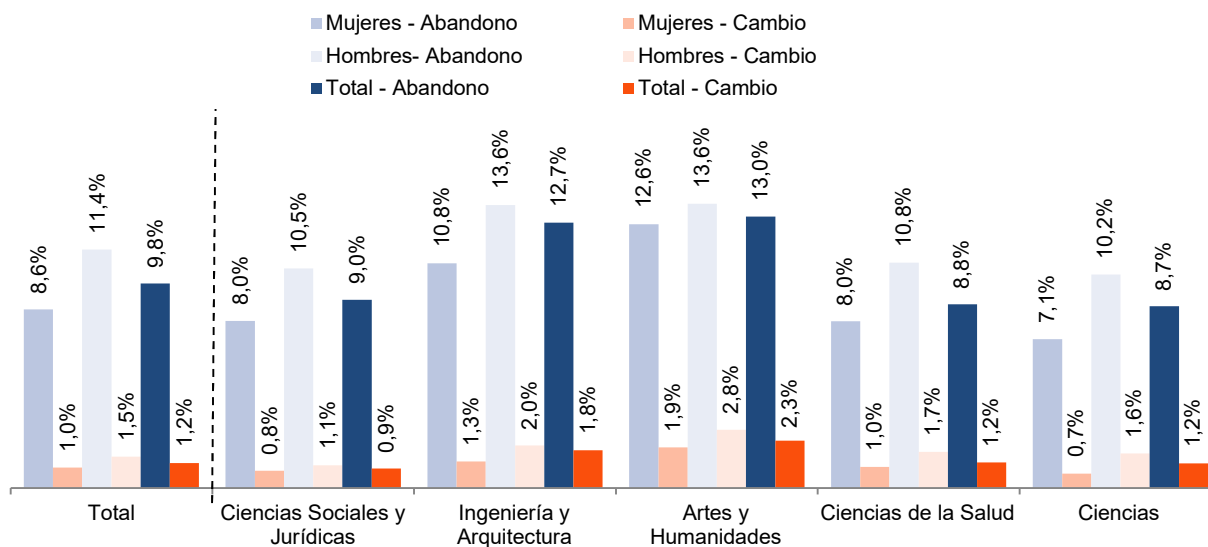

**Tabla 7.1.8** Nota media del expediente académico de los egresados de Máster por rama de enseñanza y sexo. Curso 2019-2020

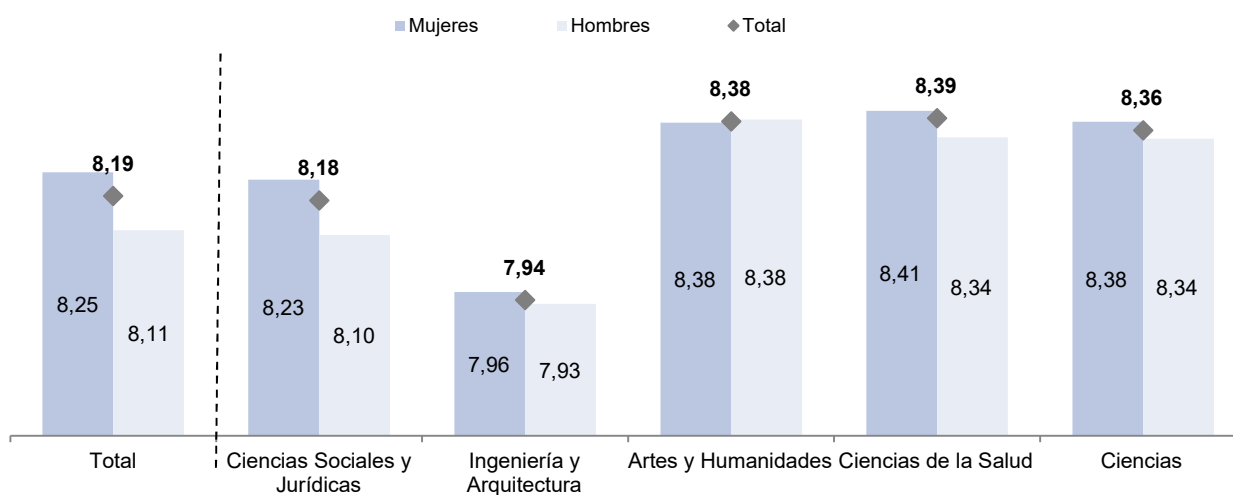

## 7.2 Indicadores de Máster. Número de créditos

**Tabla 7.2.1** Número medio de créditos matriculados, presentados y superados en Máster por tipo de universidad. Curso 2019-2020

|                            | Estudiantes matriculados |               | Número medio de créditos |             |             |
|----------------------------|--------------------------|---------------|--------------------------|-------------|-------------|
|                            | Total                    | %             | Matriculados             | Presentados | Superados   |
| <b>Total</b>               | <b>237.118</b>           | <b>100,0%</b> | <b>44,2</b>              | <b>40,8</b> | <b>40,2</b> |
| <b>Tipo de universidad</b> |                          |               |                          |             |             |
| <b>Pública</b>             | <b>139.338</b>           | <b>58,8%</b>  | <b>44,7</b>              | <b>40,9</b> | <b>40,3</b> |
| Presencial                 | 127.845                  | 91,8%         | 45,7                     | 42,1        | 41,6        |
| No presencial              | 9.478                    | 6,8%          | 32,0                     | 25,0        | 24,6        |
| Especial                   | 2.015                    | 1,4%          | 38,7                     | 37,6        | 36,5        |
| <b>Privada</b>             | <b>97.780</b>            | <b>41,2%</b>  | <b>43,6</b>              | <b>40,7</b> | <b>40,1</b> |
| Presencial                 | 43.790                   | 44,8%         | 48,5                     | 45,3        | 44,9        |
| No presencial              | 53.990                   | 55,2%         | 39,6                     | 37,0        | 36,2        |

**Tabla 7.2.2** Número medio de créditos matriculados, presentados y superados en Máster por rama de enseñanza. Curso 2019-2020

|                               | Total universidades |             |             | Univ. públicas |             |             | Univ. privadas |             |             |
|-------------------------------|---------------------|-------------|-------------|----------------|-------------|-------------|----------------|-------------|-------------|
|                               | Matric.             | Present.    | Super.      | Matric.        | Present.    | Super.      | Matric.        | Present.    | Super.      |
| <b>Total</b>                  | <b>44,2</b>         | <b>40,8</b> | <b>40,2</b> | <b>44,7</b>    | <b>40,9</b> | <b>40,3</b> | <b>43,6</b>    | <b>40,7</b> | <b>40,1</b> |
| <b>Rama de enseñanza</b>      |                     |             |             |                |             |             |                |             |             |
| Ciencias Sociales y Jurídicas | 44,6                | 41,5        | 40,8        | 45,6           | 42,4        | 42,0        | 45,3           | 42,5        | 42,0        |
| Ingeniería y Arquitectura     | 41,8                | 36,9        | 35,6        | 42,5           | 37,9        | 36,9        | 37,0           | 33,3        | 32,1        |
| Artes y Humanidades           | 40,5                | 35,1        | 34,3        | 40,8           | 35,4        | 35,0        | 35,5           | 32,6        | 32,1        |
| Ciencias de la Salud          | 45,6                | 42,5        | 42,0        | 47,0           | 43,7        | 43,4        | 42,3           | 39,3        | 38,7        |
| Ciencias                      | 48,4                | 44,2        | 43,4        | 48,1           | 44,4        | 44,0        | 43,4           | 37,4        | 35,5        |

**Tabla 7.2.3** Distribución de créditos matriculados en Máster en primera, segunda y tercera y sucesivas matrículas. Curso 2019-2020

|                               | Total créditos matriculados | Distribución según matrícula |             |             |
|-------------------------------|-----------------------------|------------------------------|-------------|-------------|
|                               |                             | 1ª vez                       | 2ª vez      | 3ª vez      |
| <b>Total</b>                  | <b>10.437.310</b>           | <b>95,7%</b>                 | <b>3,5%</b> | <b>0,8%</b> |
| <b>Rama de enseñanza</b>      |                             |                              |             |             |
| Ciencias Sociales y Jurídicas | 6.305.089                   | 96,7%                        | 2,7%        | 0,6%        |
| Ingeniería y Arquitectura     | 1.811.270                   | 92,3%                        | 6,1%        | 1,6%        |
| Artes y Humanidades           | 721.084                     | 93,1%                        | 5,5%        | 1,4%        |
| Ciencias de la Salud          | 1.131.776                   | 97,1%                        | 2,4%        | 0,5%        |
| Ciencias                      | 468.092                     | 96,2%                        | 3,2%        | 0,6%        |

## 7.3 Indicadores de Máster. Rendimiento

**Tabla 7.3.1** Tasas de rendimiento, éxito y evaluación en Máster por tipo de universidad. Curso 2019-2020

|                            | <b>Rendimiento</b> | <b>Éxito</b> | <b>Evaluación</b> |
|----------------------------|--------------------|--------------|-------------------|
| <b>Total</b>               | <b>91,0%</b>       | <b>98,6%</b> | <b>92,3%</b>      |
| <b>Tipo de universidad</b> |                    |              |                   |
| <b>Univ. públicas</b>      | <b>90,3%</b>       | <b>98,7%</b> | <b>91,5%</b>      |
| Presencial                 | 90,9%              | 98,7%        | 92,1%             |
| No presencial              | 76,9%              | 98,5%        | 78,1%             |
| Especial                   | 94,4%              | 97,2%        | 97,1%             |
| <b>Univ. privadas</b>      | <b>92,0%</b>       | <b>98,5%</b> | <b>93,4%</b>      |
| Presencial                 | 92,5%              | 99,0%        | 93,4%             |
| No presencial              | 91,5%              | 98,0%        | 93,4%             |

**Tabla 7.3.2** Tasas de rendimiento, éxito y evaluación en Máster por rama de enseñanza. Curso 2019-2020

|                               | <b>Rendimiento</b> | <b>Éxito</b> | <b>Evaluación</b> |
|-------------------------------|--------------------|--------------|-------------------|
| <b>Total</b>                  | <b>91,0%</b>       | <b>98,6%</b> | <b>92,3%</b>      |
| <b>Rama de enseñanza</b>      |                    |              |                   |
| Ciencias Sociales y Jurídicas | 92,5%              | 98,9%        | 93,5%             |
| Ingeniería y Arquitectura     | 86,8%              | 97,1%        | 89,4%             |
| Artes y Humanidades           | 86,6%              | 98,6%        | 87,8%             |
| Ciencias de la Salud          | 91,9%              | 98,9%        | 92,9%             |
| Ciencias                      | 90,9%              | 98,9%        | 91,9%             |
| <b>Univ. públicas</b>         | <b>90,3%</b>       | <b>98,7%</b> | <b>91,5%</b>      |
| <b>Rama de enseñanza</b>      |                    |              |                   |
| Ciencias Sociales y Jurídicas | 92,1%              | 99,1%        | 92,9%             |
| Ingeniería y Arquitectura     | 86,8%              | 97,2%        | 89,3%             |
| Artes y Humanidades           | 85,8%              | 98,7%        | 86,9%             |
| Ciencias de la Salud          | 92,3%              | 99,4%        | 92,8%             |
| Ciencias                      | 91,4%              | 99,1%        | 92,2%             |
| <b>Univ. privadas</b>         | <b>92,0%</b>       | <b>98,5%</b> | <b>93,4%</b>      |
| <b>Rama de enseñanza</b>      |                    |              |                   |
| Ciencias Sociales y Jurídicas | 92,8%              | 98,8%        | 94,0%             |
| Ingeniería y Arquitectura     | 86,9%              | 96,6%        | 89,9%             |
| Artes y Humanidades           | 90,3%              | 98,4%        | 91,7%             |
| Ciencias de la Salud          | 91,4%              | 98,3%        | 93,0%             |
| Ciencias                      | 81,7%              | 94,9%        | 86,1%             |

## 7.3 Indicadores de Máster. Rendimiento

Gráfico 7.3.3 Tasa de rendimiento en Máster por ámbito de estudio. Curso 2019-2020

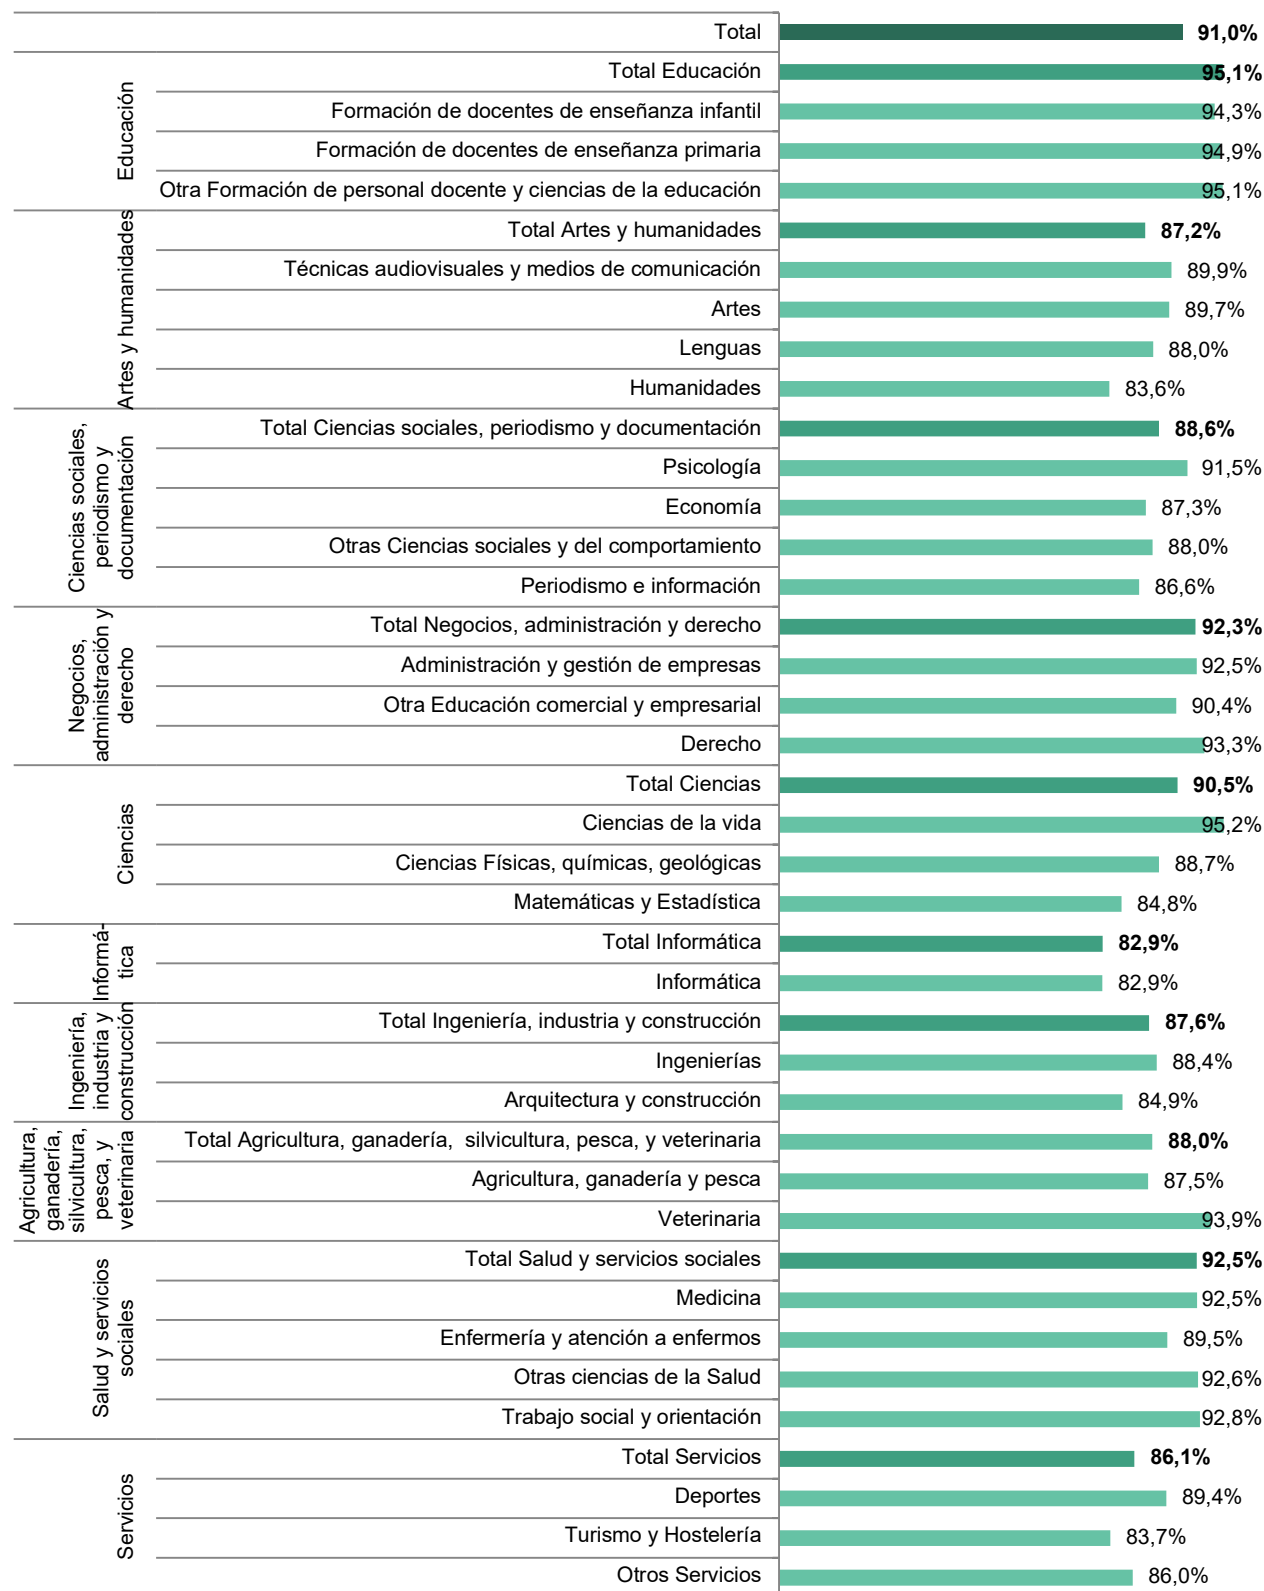

## 7.3 Indicadores de Máster. Rendimiento

**Tabla 7.3.4** Tasas de rendimiento, éxito y evaluación en Máster por comunidad autónoma. Curso 2019-2020

|                              | <b>Total estudiantes matriculados</b> | <b>Rendimiento</b> | <b>Éxito</b> | <b>Evaluación</b> |
|------------------------------|---------------------------------------|--------------------|--------------|-------------------|
| <b>Total</b>                 | <b>237.118</b>                        | <b>91,0%</b>       | <b>98,6%</b> | <b>92,3%</b>      |
| <b>Univ. presenciales</b>    | <b>171.635</b>                        | <b>91,3%</b>       | <b>98,8%</b> | <b>92,4%</b>      |
| Andalucía                    | 26.463                                | 88,1%              | 98,9%        | 89,1%             |
| Aragón                       | 2.651                                 | 92,7%              | 99,0%        | 93,7%             |
| Asturias (Ppdo. de)          | 1.802                                 | 89,4%              | 99,3%        | 90,1%             |
| Balears (Illes)              | 1.461                                 | 88,8%              | 98,3%        | 90,4%             |
| Canarias                     | 4.570                                 | 85,7%              | 97,0%        | 88,3%             |
| Cantabria                    | 3.408                                 | 95,1%              | 98,9%        | 96,1%             |
| Castilla - La Mancha         | 1.898                                 | 92,9%              | 99,0%        | 93,8%             |
| Castilla y León              | 9.910                                 | 95,4%              | 99,1%        | 96,3%             |
| Cataluña                     | 29.042                                | 92,9%              | 98,9%        | 93,9%             |
| Comunitat Valenciana         | 20.560                                | 92,1%              | 99,0%        | 93,0%             |
| Extremadura                  | 1.891                                 | 90,9%              | 99,2%        | 91,6%             |
| Galicia                      | 6.019                                 | 88,9%              | 98,8%        | 89,8%             |
| Madrid (Com. de)             | 46.420                                | 90,6%              | 98,4%        | 92,1%             |
| Murcia (Región de)           | 6.137                                 | 91,4%              | 99,0%        | 92,3%             |
| Navarra (Com. Foral de)      | 3.380                                 | 98,0%              | 99,9%        | 98,1%             |
| País Vasco                   | 5.524                                 | 94,8%              | 98,8%        | 95,9%             |
| Rioja (La)                   | 499                                   | 92,2%              | 99,0%        | 93,2%             |
| <b>Univ. no presenciales</b> | <b>63.468</b>                         | <b>89,7%</b>       | <b>98,1%</b> | <b>91,5%</b>      |
| <b>Univ. especiales</b>      | <b>2.015</b>                          | <b>94,4%</b>       | <b>97,2%</b> | <b>97,1%</b>      |

## 7.4 Indicadores de Máster. Abandono y cambio de estudio

**Tabla 7.4.1** Tasas globales de abandono y cambio del estudio en Máster por tipo de universidad. Cohorte de nuevo ingreso de 2015-2016

|                                         | Total                |                   | Universidades públicas |                   | Universidades privadas |                   |
|-----------------------------------------|----------------------|-------------------|------------------------|-------------------|------------------------|-------------------|
|                                         | Abandono del estudio | Cambio de estudio | Abandono del estudio   | Cambio de estudio | Abandono del estudio   | Cambio de estudio |
| <b>Total</b>                            | <b>15,7%</b>         | <b>1,8%</b>       | <b>14,6%</b>           | <b>2,1%</b>       | <b>18,0%</b>           | <b>1,4%</b>       |
| <b>Presencialidad de la universidad</b> |                      |                   |                        |                   |                        |                   |
| Univ. Presenciales                      | 14,6%                | 1,7%              | 13,7%                  | 1,9%              | 17,8%                  | 1,1%              |
| Univ. No presenciales                   | 20,7%                | 2,4%              | 28,9%                  | 5,2%              | 18,3%                  | 1,6%              |
| Univ. Especiales                        | 10,8%                | 1,4%              | 10,8%                  | 1,4%              | -                      | -                 |

**Tabla 7.4.2** Tasas globales de abandono y cambio del estudio en Máster por rama de enseñanza. Cohorte de nuevo ingreso de 2015-2016

|                               | Total                |                   | Universidades públicas |                   | Universidades privadas |                   |
|-------------------------------|----------------------|-------------------|------------------------|-------------------|------------------------|-------------------|
|                               | Abandono del estudio | Cambio de estudio | Abandono del estudio   | Cambio de estudio | Abandono del estudio   | Cambio de estudio |
| <b>Total</b>                  | <b>15,7%</b>         | <b>1,8%</b>       | <b>14,6%</b>           | <b>2,1%</b>       | <b>18,0%</b>           | <b>1,4%</b>       |
| <b>Rama de enseñanza</b>      |                      |                   |                        |                   |                        |                   |
| Ciencias Sociales y Jurídicas | 13,8%                | 1,5%              | 11,9%                  | 1,7%              | 16,5%                  | 1,1%              |
| Ingeniería y Arquitectura     | 21,2%                | 2,5%              | 20,4%                  | 2,6%              | 25,1%                  | 2,0%              |
| Artes y Humanidades           | 22,4%                | 3,1%              | 21,8%                  | 3,1%              | 26,7%                  | 3,3%              |
| Ciencias de la Salud          | 14,2%                | 1,8%              | 11,2%                  | 1,9%              | 20,3%                  | 1,7%              |
| Ciencias                      | 15,0%                | 2,0%              | 14,5%                  | 1,9%              | -                      | -                 |

**Gráfico 7.4.3** Tasas globales de abandono y cambio del estudio en Máster según la duración teórica del estudio. Cohorte de nuevo ingreso en el curso 2015-2016

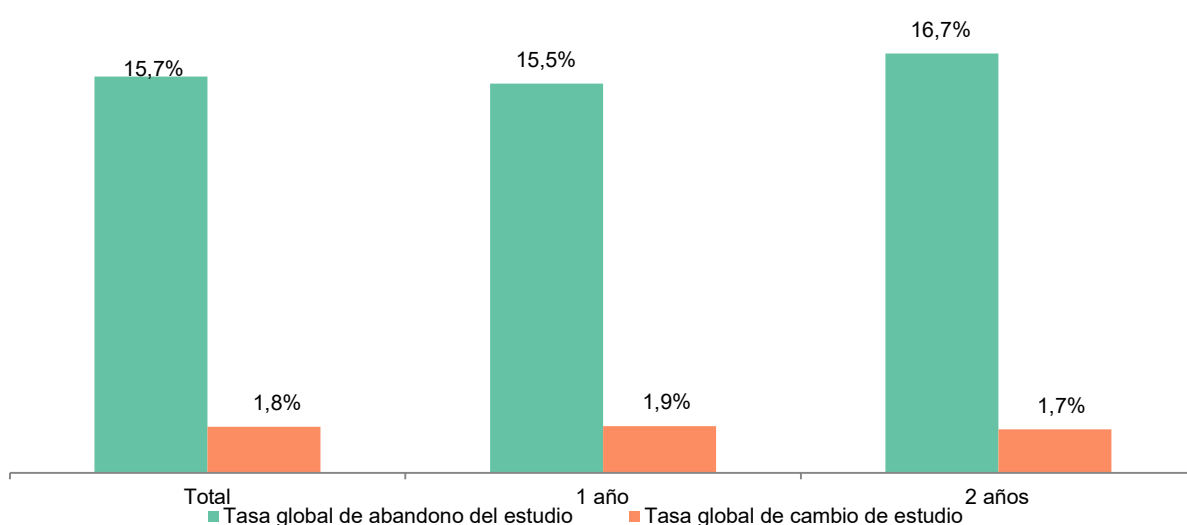

## 7.4 Indicadores de Máster. Abandono y cambio de estudio

**Tabla 7.4.4** Tasas globales de abandono y cambio del estudio en Máster por comunidad autónoma. Cohorte de nuevo ingreso de 2015-2016

|                              | Total                |                   | Universidades públicas |                   | Universidades privadas |                   |
|------------------------------|----------------------|-------------------|------------------------|-------------------|------------------------|-------------------|
|                              | Abandono del estudio | Cambio de estudio | Abandono del estudio   | Cambio de estudio | Abandono del estudio   | Cambio de estudio |
| <b>Total</b>                 | <b>15,7%</b>         | <b>1,8%</b>       | <b>14,6%</b>           | <b>2,1%</b>       | <b>18,0%</b>           | <b>1,4%</b>       |
| <b>Univ. presenciales</b>    | <b>14,6%</b>         | <b>1,7%</b>       | <b>13,7%</b>           | <b>1,9%</b>       | <b>17,8%</b>           | <b>1,1%</b>       |
| Andalucía                    | 15,8%                | 2,4%              | 15,6%                  | 2,4%              | 32,8%                  | 3,3%              |
| Aragón                       | 12,3%                | 2,2%              | 8,3%                   | 1,7%              | 65,2%                  | 8,7%              |
| Asturias (Principado de)     | 6,9%                 | 1,1%              | 6,9%                   | 1,1%              | -                      | -                 |
| Balears (Illes)              | 14,9%                | 2,1%              | 14,9%                  | 2,1%              | -                      | -                 |
| Canarias                     | 9,8%                 | 1,6%              | 8,6%                   | 1,8%              | 20,1%                  | -                 |
| Cantabria                    | 16,1%                | 2,5%              | 14,2%                  | 2,8%              | 27,6%                  | -                 |
| Castilla - La Mancha         | 15,2%                | 1,5%              | 15,2%                  | 1,5%              | -                      | -                 |
| Castilla y León              | 6,9%                 | 0,6%              | 9,0%                   | 0,9%              | 3,6%                   | 0,2%              |
| Cataluña                     | 17,9%                | 2,4%              | 16,5%                  | 2,6%              | 26,8%                  | 1,7%              |
| Comunitat Valenciana         | 14,3%                | 1,5%              | 15,4%                  | 1,6%              | 9,1%                   | 0,6%              |
| Extremadura                  | 11,6%                | 0,9%              | 11,6%                  | 0,9%              | -                      | -                 |
| Galicia                      | 10,7%                | 1,3%              | 10,7%                  | 1,3%              | -                      | -                 |
| Madrid (Comunidad de)        | 15,5%                | 1,4%              | 12,1%                  | 1,4%              | 20,9%                  | 1,4%              |
| Murcia (Región de)           | 15,3%                | 1,1%              | 10,7%                  | 1,2%              | 18,9%                  | 1,0%              |
| Navarra (Comunidad Foral de) | 9,0%                 | 0,3%              | 15,0%                  | 0,8%              | 6,4%                   | 0,1%              |
| País Vasco                   | 10,2%                | 1,6%              | 11,2%                  | 2,2%              | 8,6%                   | 0,7%              |
| Rioja (La)                   | 12,9%                | 2,9%              | 12,9%                  | 2,9%              | -                      | -                 |
| <b>Univ. no presenciales</b> | <b>20,7%</b>         | <b>2,4%</b>       | <b>20,9%</b>           | <b>5,2%</b>       | <b>18,3%</b>           | <b>1,6%</b>       |
| <b>Univ. especiales</b>      | <b>10,8%</b>         | <b>1,4%</b>       | <b>10,8%</b>           | <b>1,4%</b>       | -                      | -                 |



## 7.4 Indicadores de Máster. Abandono y cambio de estudio

**Tabla 7.4.5** Tasas parciales de abandono y cambio del estudio en primer año en Máster por tipo de universidad. Cohorte de nuevo ingreso de 2017-2018

|                                         | Total                          |                              | Universidades públicas         |                              | Universidades privadas         |                              |
|-----------------------------------------|--------------------------------|------------------------------|--------------------------------|------------------------------|--------------------------------|------------------------------|
|                                         | Abandono del estudio en 1º año | Cambio del estudio en 1º año | Abandono del estudio en 1º año | Cambio del estudio en 1º año | Abandono del estudio en 1º año | Cambio del estudio en 1º año |
| <b>Total</b>                            | <b>9,8%</b>                    | <b>1,2%</b>                  | <b>8,8%</b>                    | <b>1,3%</b>                  | <b>11,5%</b>                   | <b>1,1%</b>                  |
| <b>Presencialidad de la universidad</b> |                                |                              |                                |                              |                                |                              |
| Univ. presenciales                      | 8,4%                           | 1,0%                         | 8,1%                           | 1,1%                         | 9,4%                           | 0,9%                         |
| Univ. no presenciales                   | 14,9%                          | 1,8%                         | 22,9%                          | 5,0%                         | 13,5%                          | 1,3%                         |
| Univ. especiales                        | 7,9%                           | 0,7%                         | 7,9%                           | 0,7%                         | -                              | -                            |

**Tabla 7.4.6** Tasas parciales de abandono y cambio del estudio en primer año en Máster por rama de enseñanza. Cohorte de nuevo ingreso de 2017-2018

|                               | Total                          |                              | Universidades públicas         |                              | Universidades privadas         |                              |
|-------------------------------|--------------------------------|------------------------------|--------------------------------|------------------------------|--------------------------------|------------------------------|
|                               | Abandono del estudio en 1º año | Cambio del estudio en 1º año | Abandono del estudio en 1º año | Cambio del estudio en 1º año | Abandono del estudio en 1º año | Cambio del estudio en 1º año |
| <b>Total</b>                  | <b>9,8%</b>                    | <b>1,2%</b>                  | <b>8,8%</b>                    | <b>1,3%</b>                  | <b>11,5%</b>                   | <b>1,1%</b>                  |
| <b>Rama de enseñanza</b>      |                                |                              |                                |                              |                                |                              |
| Ciencias Sociales y Jurídicas | 9,0%                           | 9,3%                         | 7,7%                           | 9,2%                         | 10,5%                          | 0,9%                         |
| Ingeniería y Arquitectura     | 1,3%                           | 1,8%                         | 11,3%                          | 1,8%                         | 18,0%                          | 1,8%                         |
| Artes y Humanidades           | 13,0%                          | 2,3%                         | 12,4%                          | 2,3%                         | 15,8%                          | 2,0%                         |
| Ciencias de la Salud          | 8,8%                           | 1,2%                         | 7,3%                           | 1,2%                         | 11,7%                          | 1,2%                         |
| Ciencias                      | 8,7%                           | 1,2%                         | 8,1%                           | 1,2%                         | 21,6%                          | 1,7%                         |

**Gráfico 7.4.7** Tasas parciales de abandono y cambio del estudio en primer año en Máster según la duración teórica del estudio. Cohorte de nuevo ingreso de 2017-2018

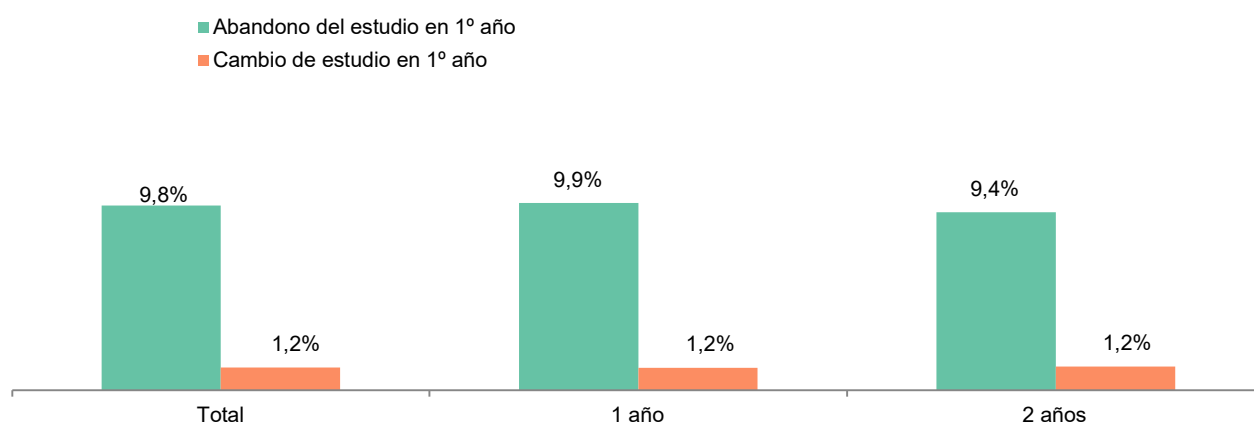

## 7.4 Indicadores de Máster. Abandono y cambio de estudio

**Tabla 7.4.8** Tasas parciales de abandono y cambio del estudio en primer año en Máster por comunidad autónoma. Cohorte de nuevo ingreso de 2017-2018

|                              | Total                          |                                | Universidades públicas         |                                | Universidades privadas         |                                |
|------------------------------|--------------------------------|--------------------------------|--------------------------------|--------------------------------|--------------------------------|--------------------------------|
|                              | Abandono del estudio en 1º año | Cambio de estudio en el 1º año | Abandono del estudio en 1º año | Cambio de estudio en el 1º año | Abandono del estudio en 1º año | Cambio de estudio en el 1º año |
| <b>Total</b>                 | <b>9,8%</b>                    | <b>1,2%</b>                    | <b>8,8%</b>                    | <b>1,3%</b>                    | <b>11,5%</b>                   | <b>1,1%</b>                    |
| <b>Univ. presenciales</b>    | <b>8,4%</b>                    | <b>1,0%</b>                    | <b>8,1%</b>                    | <b>1,1%</b>                    | <b>9,4%</b>                    | <b>0,9%</b>                    |
| Andalucía                    | 9,8%                           | 1,5%                           | 9,8%                           | 1,5%                           | 12,9%                          | 0,6%                           |
| Aragón                       | 7,9%                           | 1,5%                           | 6,3%                           | 1,5%                           | 28,4%                          | 1,5%                           |
| Asturias (Principado de)     | 9,2%                           | 1,6%                           | 9,2%                           | 1,6%                           | -                              | -                              |
| Balears (Illes)              | 8,9%                           | 1,4%                           | 8,9%                           | 1,4%                           | -                              | -                              |
| Canarias                     | 5,1%                           | 0,9%                           | 4,8%                           | 0,9%                           | 8,8%                           | 0,0%                           |
| Cantabria                    | 12,7%                          | 1,1%                           | 12,8%                          | 2,5%                           | 12,6%                          | 0,2%                           |
| Castilla - La Mancha         | 8,2%                           | 0,9%                           | 8,2%                           | 0,9%                           | -                              | -                              |
| Castilla y León              | 8,4%                           | 1,5%                           | 5,2%                           | 0,8%                           | 11,5%                          | 2,1%                           |
| Cataluña                     | 7,6%                           | 0,8%                           | 8,2%                           | 0,9%                           | 4,8%                           | 0,3%                           |
| Comunitat Valenciana         | 7,4%                           | 0,9%                           | 7,6%                           | 1,0%                           | 6,3%                           | 0,4%                           |
| Extremadura                  | 8,2%                           | 0,8%                           | 8,2%                           | 0,8%                           | -                              | -                              |
| Galicia                      | 6,3%                           | 1,1%                           | 6,3%                           | 1,1%                           | -                              | -                              |
| Madrid (Comunidad de)        | 9,6%                           | 0,9%                           | 8,3%                           | 0,9%                           | 11,6%                          | 0,9%                           |
| Murcia (Región de)           | 7,1%                           | 1,1%                           | 6,0%                           | 1,0%                           | 8,2%                           | 1,1%                           |
| Navarra (Comunidad Foral de) | 3,5%                           | 0,1%                           | 5,0%                           | 0,2%                           | 2,9%                           | 0,1%                           |
| País Vasco                   | 5,1%                           | 0,7%                           | 6,0%                           | 0,9%                           | 3,7%                           | 0,3%                           |
| Rioja (La)                   | 9,0%                           | 1,6%                           | 9,0%                           | 1,6%                           | -                              | -                              |
| <b>Univ. no presenciales</b> | <b>14,9%</b>                   | <b>1,8%</b>                    | <b>22,9%</b>                   | <b>5,0%</b>                    | <b>13,5%</b>                   | <b>1,3%</b>                    |
| <b>Univ. especiales</b>      | <b>7,9%</b>                    | <b>0,7%</b>                    | <b>7,9%</b>                    | <b>0,7%</b>                    | -                              | -                              |

## 7.5 Indicadores de Máster. Nota del expediente

**Gráfico 7.5.1** Distribución del número de estudiantes egresados de Máster por nota media del expediente académico. Curso 2019-2020

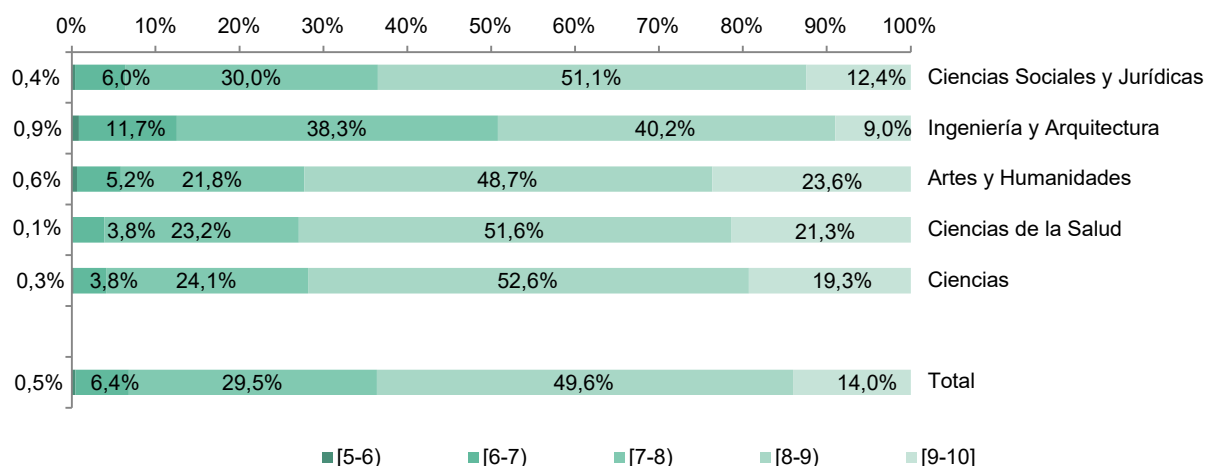

**Gráfico 7.5.2** Nota media del expediente académico de los estudiantes egresados de Máster por modalidad de la universidad. Curso 2019-2020

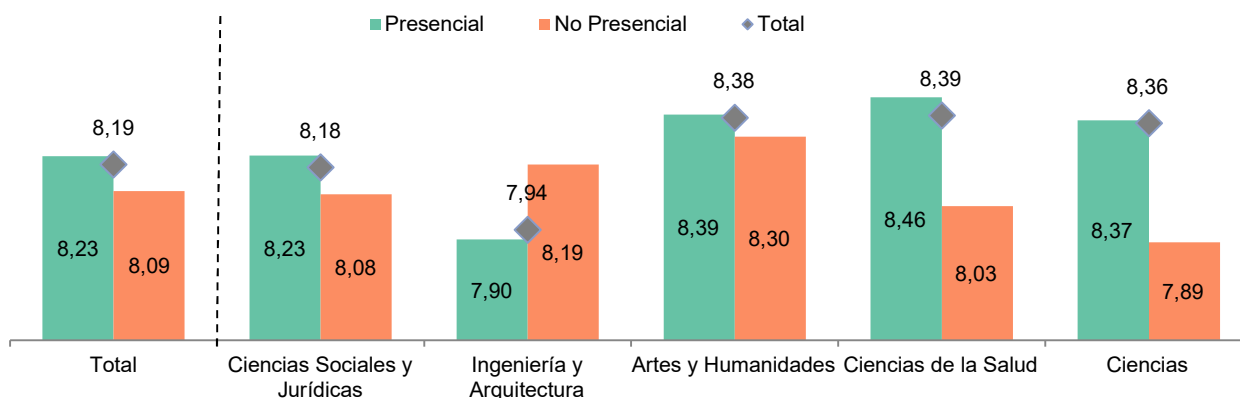

**Tabla 7.5.3** Media y cuartiles de la nota de expediente de los estudiantes egresados de Máster por rama de enseñanza y tipo de universidad. Curso 2019-2020

|                           | Total universidades |                |                | Universidades públicas |                |                | Universidades privadas |                |                |
|---------------------------|---------------------|----------------|----------------|------------------------|----------------|----------------|------------------------|----------------|----------------|
|                           | Nota media          | Primer cuartil | Tercer cuartil | Nota media             | Primer cuartil | Tercer cuartil | Nota media             | Primer cuartil | Tercer cuartil |
| Total                     | 8,19                | 7,72           | 8,74           | 8,23                   | 7,76           | 8,78           | 8,15                   | 7,68           | 8,69           |
| C. Sociales y Jurídicas   | 8,18                | 7,73           | 8,71           | 8,23                   | 7,80           | 8,75           | 8,14                   | 7,67           | 8,68           |
| Ingeniería y Arquitectura | 7,94                | 7,40           | 8,52           | 7,89                   | 7,35           | 8,47           | 8,08                   | 7,57           | 8,66           |
| Artes y Humanidades       | 8,38                | 7,91           | 8,96           | 8,38                   | 7,90           | 8,97           | 8,40                   | 8,00           | 8,93           |
| Ciencias de la Salud      | 8,39                | 7,94           | 8,92           | 8,50                   | 8,08           | 9,00           | 8,19                   | 7,73           | 8,72           |
| Ciencias                  | 8,36                | 7,91           | 8,88           | 8,37                   | 7,92           | 8,89           | 8,10                   | 7,62           | 8,70           |

**Primer cuartil:** Es la nota del expediente académico bajo la que se encuentra el 25% de los estudiantes egresados

**Tercer cuartil:** Es la nota del expediente académico bajo la que se encuentra el 75% de los estudiantes egresados

## 7.5 Indicadores de Máster. Nota del expediente

**Tabla y gráfico 7.5.4** Media y cuartiles de la nota del expediente académico de los estudiantes egresados de Máster por ámbito de estudio. Curso 2019-2020

|                                                           | Nota media del expediente académico | Cuartiles de la nota de expediente |                |
|-----------------------------------------------------------|-------------------------------------|------------------------------------|----------------|
|                                                           |                                     | Primer cuartil                     | Tercer cuartil |
| <b>Total</b>                                              | 8,19                                | <b>7,72</b>                        | <b>8,74</b>    |
| <b>Ámbito de estudio</b>                                  |                                     |                                    |                |
| <b>Total Educación</b>                                    | 8,34                                | <b>7,92</b>                        | <b>8,82</b>    |
| Formación de docentes de enseñanza infantil               |                                     | 8,45                               | 8,60           |
| Formación de docentes de enseñanza primaria               | 8,25                                | 7,83                               | 8,71           |
| Otra Formación de personal docente y cc. de la educ.      | 8,34                                | 7,93                               | 8,82           |
| <b>Total Artes y humanidades</b>                          | 8,39                                | <b>7,92</b>                        | <b>8,95</b>    |
| Técnicas audiovisuales y medios de comunicación           | 8,24                                | 7,85                               | 8,78           |
| Artes                                                     | 8,42                                | 7,96                               | 8,98           |
| Lenguas                                                   | 8,37                                | 7,88                               | 8,93           |
| Humanidades                                               | 8,44                                | 7,97                               | 9,01           |
| <b>Total Ciencias sociales, periodismo y doc.</b>         | 8,17                                | <b>7,69</b>                        | <b>8,74</b>    |
| Psicología                                                | 8,14                                | 7,68                               | 8,67           |
| Economía                                                  | 7,87                                | 7,26                               | 8,55           |
| Otras Ciencias sociales y del comportamiento              | 8,27                                | 7,83                               | 8,80           |
| Periodismo e información                                  | 8,12                                | 7,65                               | 8,74           |
| <b>Total Negocios, administración y derecho</b>           | 8,03                                | <b>7,56</b>                        | <b>8,57</b>    |
| Administración y gestión de empresas                      | 8,01                                | 7,53                               | 8,56           |
| Otra Educación comercial y empresarial                    | 7,94                                | 7,43                               | 8,51           |
| Derecho                                                   | 8,12                                | 7,69                               | 8,63           |
| <b>Total Ciencias</b>                                     | 8,38                                | <b>7,92</b>                        | <b>8,93</b>    |
| Ciencias de la vida                                       | 8,49                                | 8,09                               | 8,99           |
| Ciencias Físicas, químicas, geológicas                    | 8,27                                | 7,77                               | 8,85           |
| Matemáticas y Estadística                                 | 8,35                                | 7,86                               | 8,94           |
| <b>Total Informática</b>                                  | 8,26                                | <b>7,80</b>                        | <b>8,88</b>    |
| Informática                                               | 8,26                                | 7,80                               | 8,88           |
| <b>Total Ingeniería, industria y construcción</b>         | 7,85                                | <b>7,32</b>                        | <b>8,43</b>    |
| Ingenierías                                               | 7,93                                | 7,42                               | 8,46           |
| Arquitectura y construcción                               | 7,64                                | 6,99                               | 8,33           |
| <b>Total Agricultura, ganadería, silv., pesca, y vet.</b> | 8,09                                | <b>7,58</b>                        | <b>8,65</b>    |
| Agricultura, ganadería y pesca                            | 8,04                                | 7,53                               | 8,56           |
| Veterinaria                                               | 8,67                                | 8,48                               | 9,14           |
| <b>Total Salud y servicios sociales</b>                   | 8,38                                | <b>7,94</b>                        | <b>8,90</b>    |
| Medicina                                                  | 8,52                                | 8,11                               | 9,02           |
| Enfermería y atención a enfermos                          | 8,52                                | 8,05                               | 9,05           |
| Otras ciencias de la Salud                                | 8,37                                | 7,92                               | 8,88           |
| Trabajo social y orientación                              | 8,31                                | 7,83                               | 8,84           |
| <b>Total Servicios</b>                                    | 7,95                                | <b>7,49</b>                        | <b>8,46</b>    |
| Deportes                                                  | 8,11                                | 7,66                               | 8,62           |
| Turismo y Hostelería                                      | 7,78                                | 7,20                               | 8,39           |
| Otros Servicios                                           | 7,95                                | 7,50                               | 8,43           |

**Primer cuartil:** Es la nota del expediente académico bajo la que se encuentra el 25% de los estudiantes egresados

**Tercer cuartil:** Es la nota del expediente académico bajo la que se encuentra el 75% de los estudiantes egresados

## 7.6 Indicadores de Máster. Idoneidad, graduación y duración

**Tabla 7.6.1** Tasas de idoneidad (cohorte 2019-2020) y graduación (cohorte 2018-2019) en estudios de Máster de 1 año de duración teórica por tipo de universidad.

|                                         | Total             |                    | Universidades públicas |                    | Universidades privadas |                    |
|-----------------------------------------|-------------------|--------------------|------------------------|--------------------|------------------------|--------------------|
|                                         | Tasa de idoneidad | Tasa de graduación | Tasa de idoneidad      | Tasa de graduación | Tasa de idoneidad      | Tasa de graduación |
| <b>Total</b>                            | <b>75,5%</b>      | <b>84,5%</b>       | <b>73,8%</b>           | <b>84,1%</b>       | <b>77,9%</b>           | <b>85,2%</b>       |
| <b>Presencialidad de la universidad</b> |                   |                    |                        |                    |                        |                    |
| Univ. presenciales                      | 76,4%             | 85,2%              | 74,6%                  | 84,8%              | 81,3%                  | 86,7%              |
| Univ. no presenciales                   | 73,0%             | 81,3%              | 42,7%                  | 60,7%              | 74,8%                  | 83,5%              |
| Univ. especiales                        | 71,2%             | 81,2%              | 71,2%                  | 81,2%              | -                      | -                  |

**Tabla 7.6.2** Tasas de idoneidad (cohorte 2019-2020) y graduación (cohorte 2018-2019) en estudios de Máster de 1 año de duración teórica por rama de enseñanza.

|                          | Total             |                    | Universidades públicas |                    | Universidades privadas |                    |
|--------------------------|-------------------|--------------------|------------------------|--------------------|------------------------|--------------------|
|                          | Tasa de idoneidad | Tasa de graduación | Tasa de idoneidad      | Tasa de graduación | Tasa de idoneidad      | Tasa de graduación |
| <b>Total</b>             | <b>75,5%</b>      | <b>84,5%</b>       | <b>73,8%</b>           | <b>84,1%</b>       | <b>77,9%</b>           | <b>85,2%</b>       |
| <b>Rama de enseñanza</b> |                   |                    |                        |                    |                        |                    |
| C. Sociales y Jurídicas  | 78,3%             | 85,5%              | 76,1%                  | 84,5%              | 80,3%                  | 86,8%              |
| Ing. y Arquitectura      | 60,0%             | 76,2%              | 59,7%                  | 77,4%              | 60,8%                  | 73,2%              |
| Artes y Humanidades      | 64,2%             | 78,3%              | 62,9%                  | 78,4%              | 70,6%                  | 77,5%              |
| Ciencias de la Salud     | 76,4%             | 87,9%              | 80,4%                  | 89,4%              | 68,0%                  | 84,4%              |
| Ciencias                 | 79,8%             | 88,6%              | 80,3%                  | 89,8%              | 60,3%                  | 52,3%              |

**Gráfico 7.6.3** Duración media de los estudios de Máster (en años) según su duración teórica por rama de enseñanza. Cohorte de egresados 2019-2020

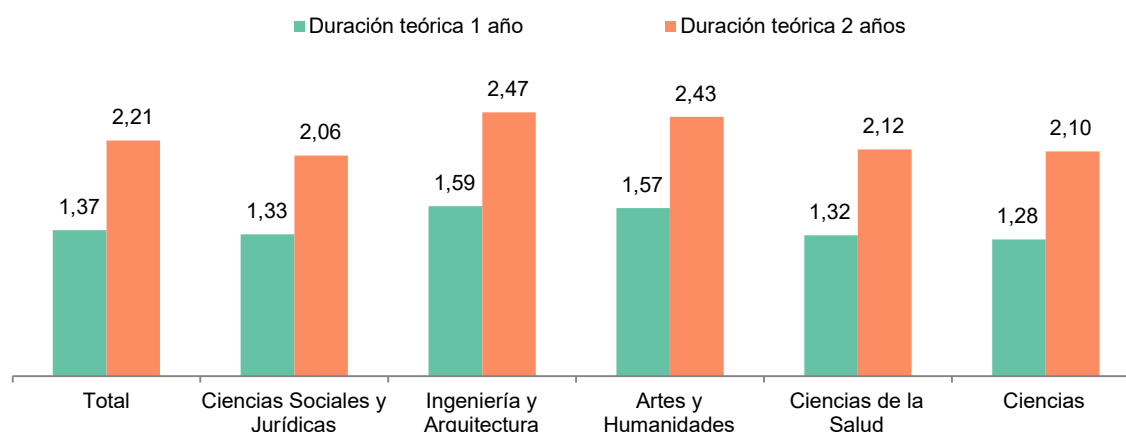

## 7.6 Indicadores de Máster. Idoneidad, graduación y duración

Tabla 7-6-4 Duración media de los estudios de Máster (en años) según su duración teórica por ámbito de estudio- Cohorte de egresados 2019-2020

|                                                                         | 1 año de duración teórica |             |             | 2 años de duración teórica |             |             |
|-------------------------------------------------------------------------|---------------------------|-------------|-------------|----------------------------|-------------|-------------|
|                                                                         | Total                     | Hombres     | Mujeres     | Total                      | Hombres     | Mujeres     |
| <b>Total</b>                                                            | <b>1,37</b>               | <b>1,40</b> | <b>1,35</b> | <b>2,21</b>                | <b>2,26</b> | <b>2,15</b> |
| <b>Ámbito de estudio</b>                                                |                           |             |             |                            |             |             |
| <b>Total Educación</b>                                                  | <b>1,27</b>               | <b>1,27</b> | <b>1,27</b> | <b>2,51</b>                | <b>2,50</b> | <b>2,51</b> |
| Formación de docentes de enseñanza infantil                             | -                         | -           | -           | -                          | -           | -           |
| Formación de docentes de enseñanza primaria                             | 1,14                      | 1,18        | 1,13        | 2,23                       | -           | 2,22        |
| Otra Formación de personal docente y ciencias de la educación           | 1,28                      | 1,27        | 1,28        | 2,63                       | 2,54        | 2,64        |
| <b>Total Artes y humanidades</b>                                        | <b>1,52</b>               | <b>1,54</b> | <b>1,50</b> | <b>2,44</b>                | <b>2,50</b> | <b>2,40</b> |
| Técnicas audiovisuales y medios de comunicación                         | 1,32                      | 1,32        | 1,32        | 2,32                       | 2,21        | 2,39        |
| Artes                                                                   | 1,47                      | 1,39        | 1,53        | 2,27                       | -           | 2,31        |
| Lenguas                                                                 | 1,53                      | 1,58        | 1,51        | 2,56                       | -           | 2,41        |
| Humanidades                                                             | 1,62                      | 1,70        | 1,55        | 2,62                       | 2,75        | 2,46        |
| <b>Total Ciencias sociales, periodismo y documentación</b>              | <b>1,45</b>               | <b>1,51</b> | <b>1,42</b> | <b>2,26</b>                | <b>2,24</b> | <b>2,26</b> |
| Psicología                                                              | 1,33                      | 1,45        | 1,31        | 2,30                       | 2,41        | 2,27        |
| Economía                                                                | 1,36                      | 1,38        | 1,33        | 2,18                       | 2,15        | 2,20        |
| Otras Ciencias sociales y del comportamiento                            | 1,54                      | 1,58        | 1,52        | 2,28                       | 2,23        | 2,31        |
| Periodismo e información                                                | 1,48                      | 1,48        | 1,48        | 1,95                       | 2,00        | 1,93        |
| <b>Total Negocios, administración y derecho</b>                         | <b>1,42</b>               | <b>1,43</b> | <b>1,41</b> | <b>2,05</b>                | <b>2,03</b> | <b>2,06</b> |
| Administración y gestión de empresas                                    | 1,38                      | 1,40        | 1,36        | 1,94                       | 1,93        | 1,96        |
| Otra Educación comercial y empresarial                                  | 1,48                      | 1,48        | 1,48        | 2,28                       | 2,23        | 2,32        |
| Derecho                                                                 | 1,41                      | 1,41        | 1,41        | 2,07                       | 2,07        | 2,07        |
| <b>Total Ciencias</b>                                                   | <b>1,28</b>               | <b>1,32</b> | <b>1,24</b> | <b>2,13</b>                | <b>2,17</b> | <b>2,09</b> |
| Ciencias de la vida                                                     | 1,18                      | 1,19        | 1,18        | 2,06                       | 2,08        | 2,04        |
| Ciencias Físicas, químicas, geológicas                                  | 1,30                      | 1,31        | 1,28        | 2,22                       | 2,27        | 2,16        |
| Matemáticas y Estadística                                               | 1,53                      | 1,55        | 1,49        | 2,28                       | 2,30        | 2,26        |
| <b>Total Informática</b>                                                | <b>1,80</b>               | <b>1,79</b> | <b>1,83</b> | <b>2,57</b>                | <b>2,55</b> | <b>2,65</b> |
| Informática                                                             | 1,80                      | 1,79        | 1,83        | 2,57                       | 2,55        | 2,65        |
| <b>Total Ingeniería, industria y construcción</b>                       | <b>1,49</b>               | <b>1,54</b> | <b>1,42</b> | <b>2,46</b>                | <b>2,49</b> | <b>2,41</b> |
| Ingenierías                                                             | 1,52                      | 1,59        | 1,42        | 2,46                       | 2,48        | 2,40        |
| Arquitectura y construcción                                             | 1,44                      | 1,45        | 1,42        | 2,50                       | 2,56        | 2,42        |
| <b>Total Agricultura, ganadería, silvicultura, pesca, y veterinaria</b> | <b>1,26</b>               | <b>1,35</b> | <b>1,20</b> | <b>2,44</b>                | <b>2,54</b> | <b>2,29</b> |
| Agricultura, ganadería y pesca                                          | 1,31                      | 1,42        | 1,24        | 2,44                       | 2,54        | 2,29        |
| Veterinaria                                                             | 1,01                      | 1,00        | 1,02        | -                          | -           | -           |
| <b>Total Salud y servicios sociales</b>                                 | <b>1,33</b>               | <b>1,33</b> | <b>1,34</b> | <b>2,09</b>                | <b>2,13</b> | <b>2,08</b> |
| Medicina                                                                | 1,31                      | 1,32        | 1,31        | 2,46                       | -           | 2,47        |
| Enfermería y atención a enfermos                                        | 1,25                      | 1,32        | 1,23        | 2,34                       | -           | 2,38        |
| Otras ciencias de la Salud                                              | 1,35                      | 1,32        | 1,37        | 2,09                       | 2,14        | 2,08        |
| Trabajo social y orientación                                            | 1,34                      | 1,40        | 1,33        | 2,03                       | 2,07        | 2,02        |
| <b>Total Servicios</b>                                                  | <b>1,35</b>               | <b>1,35</b> | <b>1,34</b> | <b>1,95</b>                | <b>1,93</b> | <b>1,96</b> |
| Deportes                                                                | 1,22                      | 1,23        | 1,21        | -                          | -           | -           |
| Turismo y Hostelería                                                    | 1,53                      | 1,59        | 1,50        | 2,06                       | -           | 2,07        |
| Otros Servicios                                                         | 1,34                      | 1,36        | 1,31        | 1,93                       | 1,92        | 1,95        |

# 8 Internacionalización

## ESTUDIANTES EXTRANJEROS

Los alumnos de nacionalidad extranjera representaron el 9,4% del total de los matriculados. El 27,5% de los estudiantes de Doctorado, el 21,3% de los de Máster y el 6% de los de Grado.

Mientras que los estudiantes extranjeros europeos y africanos se matricularon mayoritariamente en estudios de Grado, los alumnos de países americanos, asiáticos y de Oceanía se matricularon mayoritariamente en Máster y Doctorado.

En Grado el número de estudiantes extranjeros continúa su tendencia creciente, no así en Máster donde se produce un ligero descenso este curso.

Las comunidades autónomas con un mayor porcentaje de estudiantes extranjeros por matriculado fueron Navarra y C. Valenciana en estudios de Grado, para estudios de Máster y Doctorado lo fueron Cataluña, Navarra y Castilla y León.

**El número de matriculados con nacionalidad extranjera continúa su tendencia creciente y alcanza los 157.835 estudiantes.**

**Los principales países tanto en la entrada como en la salida de estudiantes fueron Italia y Francia.**

**Una mayoría de estudiantes internacionales entrantes de matrícula ordinaria fueron de América Latina y Caribe.**

## ESTUDIANTES INTERNACIONALES ENTRANTES

Los estudiantes internacionales entrantes son aquellos que viajan a España para estudiar en la universidad, bien matriculándose de forma ordinaria en una universidad presencial, o bien formando parte de algún programa de movilidad con destino alguna universidad del SUE (por ejemplo ERASMUS+).

De los 129.375 alumnos internacionales entrantes en el SUE en el curso 2019-2020, 55.593 lo hicieron a través de programas de movilidad (la mayoría de la UE) y 73.782 lo hicieron con matrícula ordinaria (la mayoría de América Latina y Caribe).

Los países con mayor número de estudiantes internacionales entrantes fueron Italia, Francia, Estados Unidos, Colombia, Alemania y México.

## ESTUDIANTES INTERNACIONALES SALIENTES

Se consideran estudiantes internacionales salientes únicamente a aquellos alumnos matriculados en el SUE que salen de España a través de un programa de movilidad.

Se contabilizan un total de 42.253 salientes del SUE a través de un programa de movilidad en el curso 2019-2020, en su mayoría con un perfil joven. El 67% de los alumnos de Grado tenían entre 18 y 21 años y el 82% de los alumnos de Máster eran menores de 26 años.

El 83% de los internacionales salientes corresponden a universidades públicas.

Los países europeos de destino con mayor número de estudiantes internacionales salientes fueron Italia, Francia y Polonia con 7.638, 3.538 y 3.165 estudiantes respectivamente.

Los destinos principales en otros continentes fueron América Latina y Caribe (3.193), EE. UU. y Canadá (2.592), y Asia Oriental (1.039).

## **Referencias**

[ANEXO I: Definiciones](#)

[Estadística de estudiantes universitarios](#)

[Estadística de internacionalización](#)

[Sistema Integrado de Información Universitaria \(SIIU\)](#)

## 8.1 Internacionalización. Estudiantes extranjeros

**Tabla 8.1.1** Número de estudiantes extranjeros en el Sistema Universitario Español.

|                                      | Matriculados <sup>(1)</sup> (2020-21) |                |             |               | Egresados (2019-20) |               |              |               |
|--------------------------------------|---------------------------------------|----------------|-------------|---------------|---------------------|---------------|--------------|---------------|
|                                      | Total                                 | Extranjeros    |             |               | Total               | Extranjeros   |              |               |
|                                      |                                       | Total          | % total     | UE-28         |                     | Total         | % total      | UE-28         |
| <b>Total</b>                         | <b>1.679.518</b>                      | <b>157.835</b> | <b>9,4%</b> | <b>48.431</b> | <b>348.965</b>      | <b>41.362</b> | <b>11,9%</b> | <b>10.296</b> |
| Estudiantes de Grado y 1º y 2º ciclo | 1.340.632                             | 80.086         | 6,0%        | 35.215        | 208.345             | 9.197         | 4,4%         | 5.109         |
| Estudiantes en Máster                | 248.460                               | 52.844         | 21,3%       | 7.608         | 131.267             | 29.813        | 22,7%        | 4.541         |
| Estudiantes de Doctorado RD 99/2011  | 90.426                                | 24.905         | 27,5%       | 5.608         | 9.353               | 2.352         | 25,1%        | 646           |

**Gráfico 8.1.2** Distribución del número de estudiantes matriculados en el Sistema Universitario por nacionalidad y nivel de estudios. Curso 2020-2021<sup>(1)</sup>

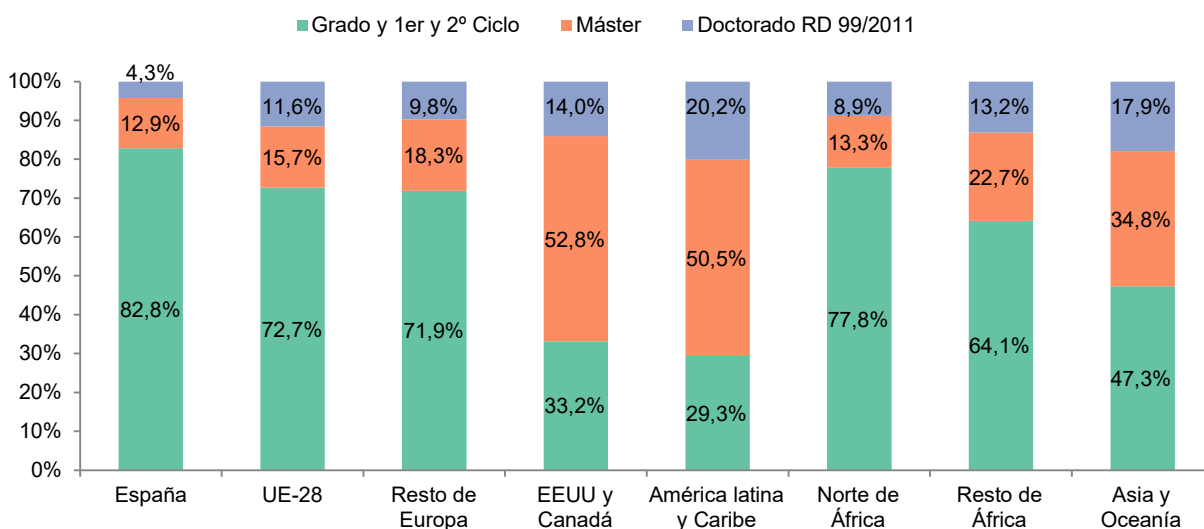

**Gráfico 8.1.3** Evolución del número de estudiantes extranjeros matriculados en Grado y Máster.

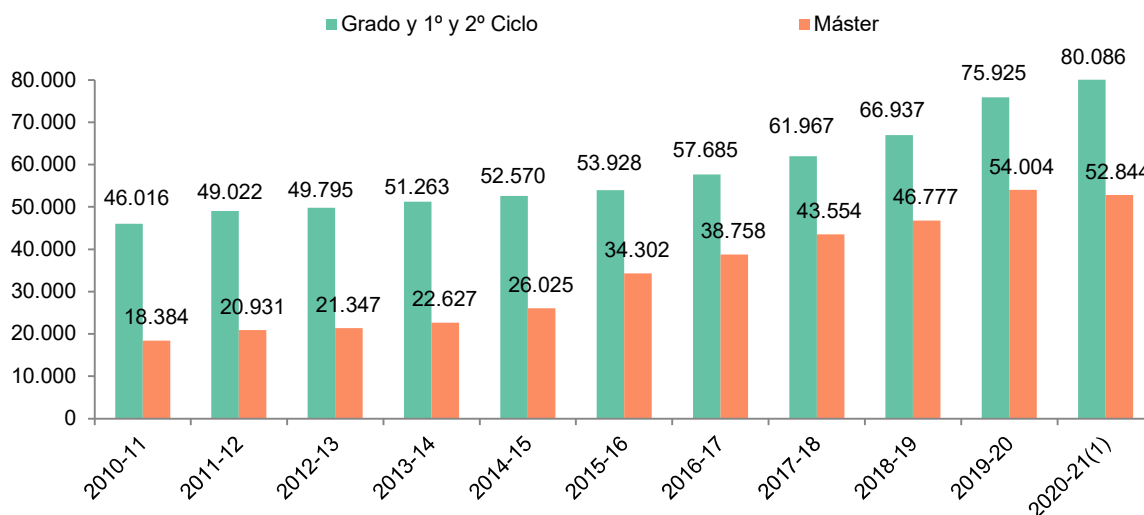

(1) Datos provisionales



## 8.1 Internacionalización. Estudiantes extranjeros de Grado

**Gráfico 8.1.4** Distribución del número de estudiantes extranjeros matriculados en Grado por sexo y nacionalidad. Curso 2020-2021<sup>(1)</sup>

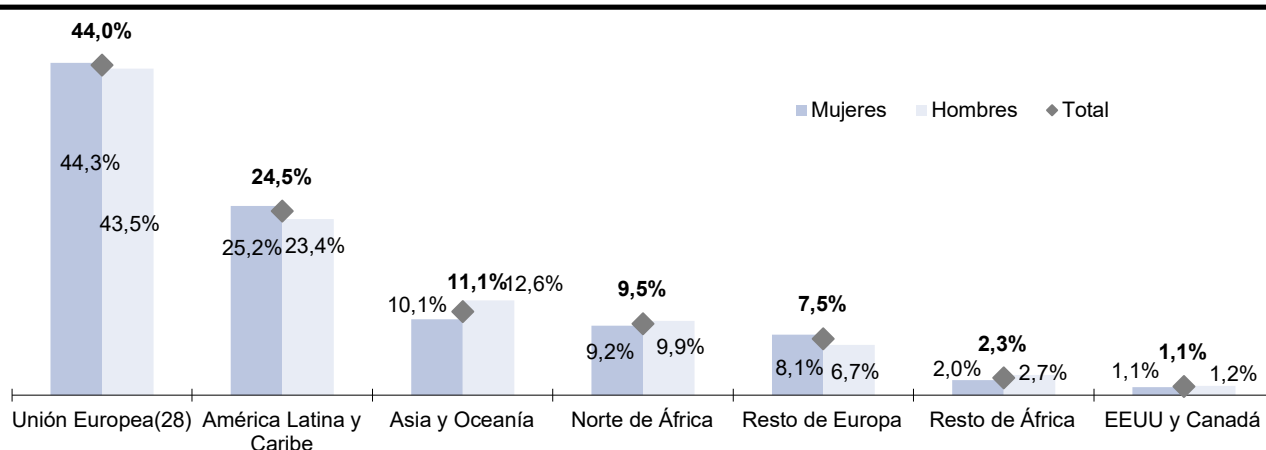

**Gráfico 8.1.5** Distribución del número de estudiantes matriculados en Grado por grupos de edad y lugar de procedencia. Curso 2020-2021<sup>(1)</sup>

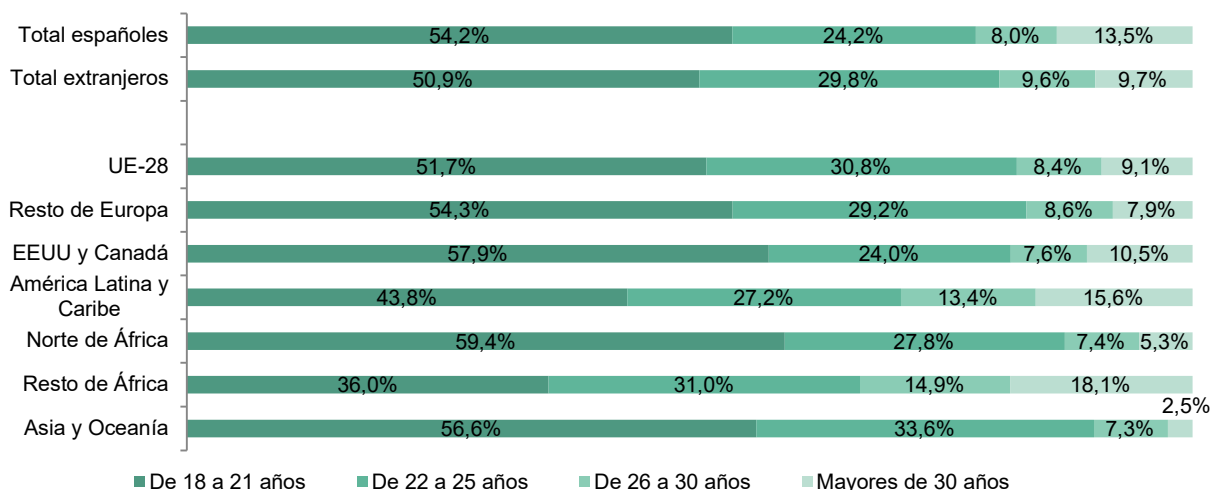

**Gráfico 8.1.6** Distribución del número de estudiantes extranjeros matriculados en Grado por Comunidad Autónoma receptora. Curso 2020-2021<sup>(1)(2)</sup>

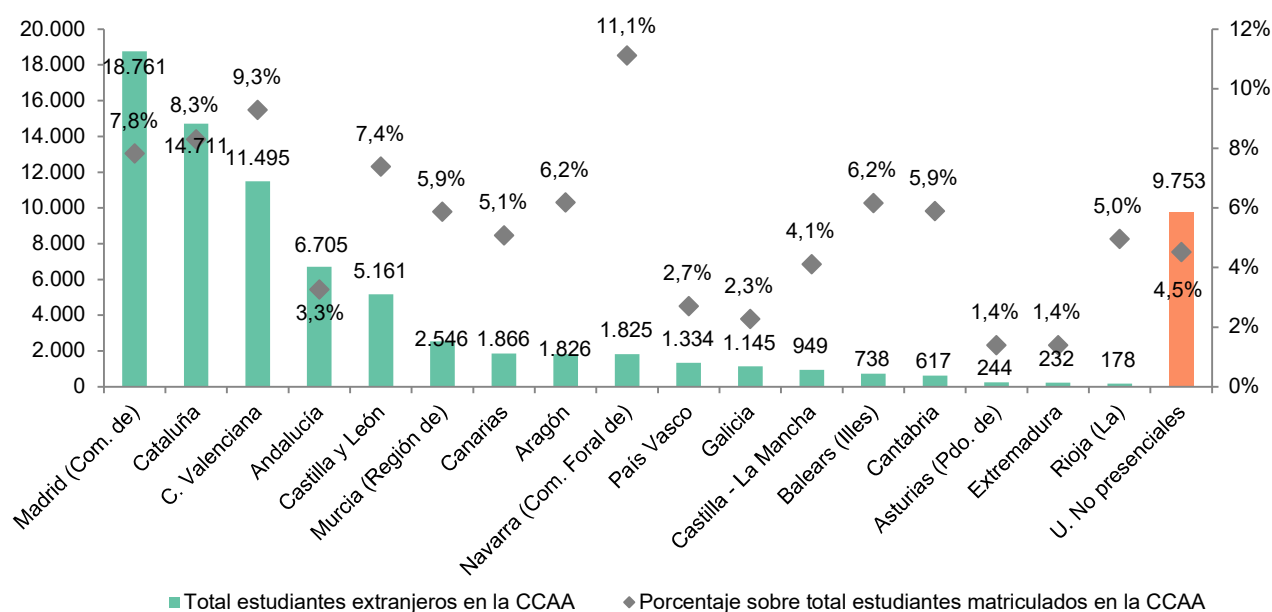

(1) Datos provisionales

(2) Para cada comunidad autónoma sólo se han considerado las universidades presenciales

## 8.1 Internacionalización. Estudiantes extranjeros de Máster

**Gráfico 8.1.7** Distribución del número de estudiantes extranjeros matriculados en Máster por sexo y nacionalidad. Curso 2020-2021<sup>(1)</sup>

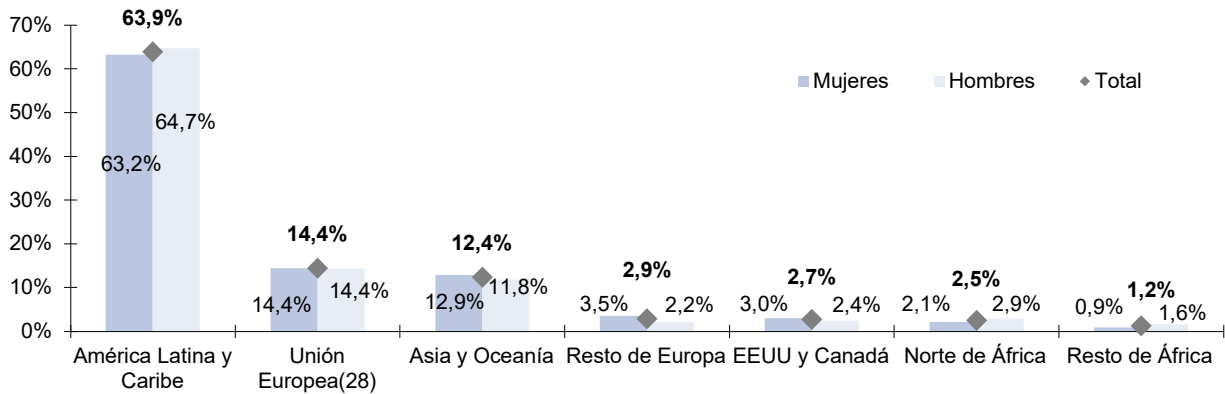

**Gráfico 8.1.8** Distribución del número de estudiantes matriculados en Máster por grupos de edad y nacionalidad. Curso 2020-2021<sup>(1)</sup>

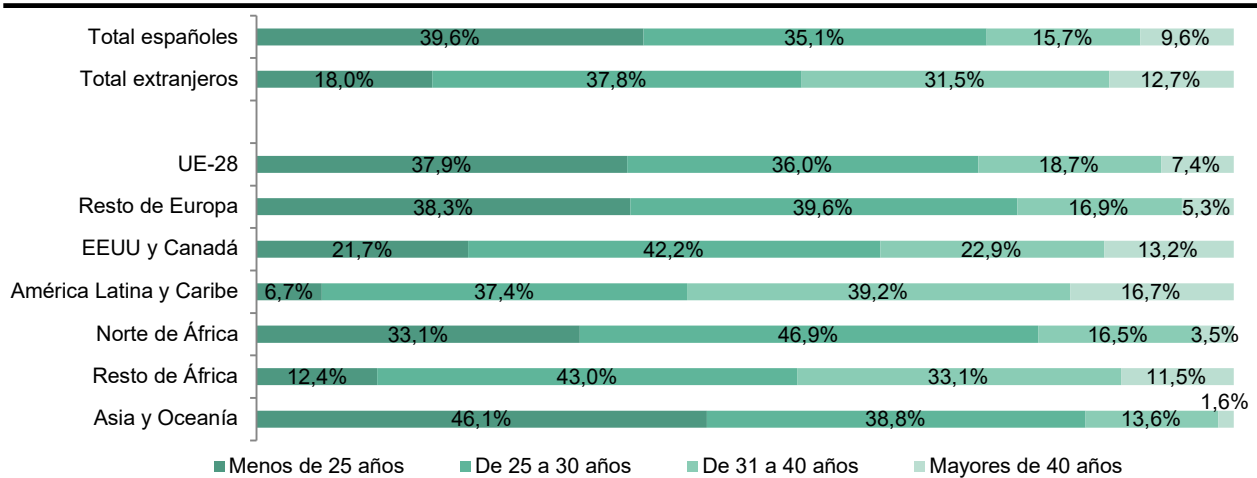

**Gráfico 8.1.9** Distribución del número de estudiantes extranjeros matriculados en Máster por comunidad autónoma receptora. Curso 2020-2021<sup>(1)(2)</sup>

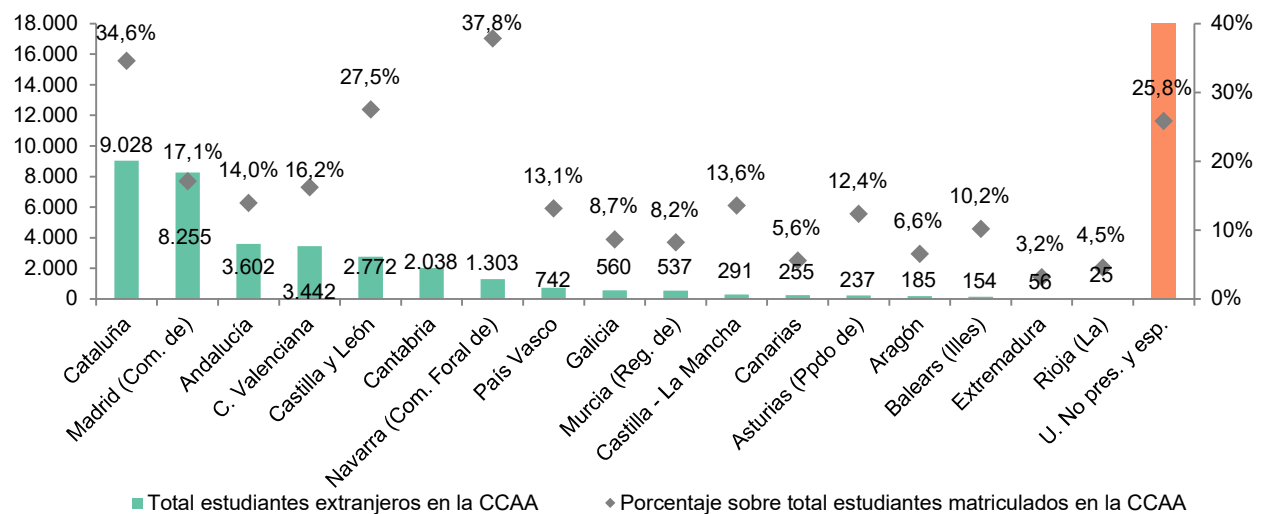

(1) Datos provisionales

(2) Para cada comunidad autónoma sólo se han considerado las universidades presenciales

## 8.1 Internacionalización. Estudiantes extranjeros de Doct. RD99/2011

**Gráfico 8.1.10** Distribución del número de estudiantes extranjeros matriculados en Doctorado por sexo y nacionalidad. Curso 2020-2021<sup>(1)</sup>

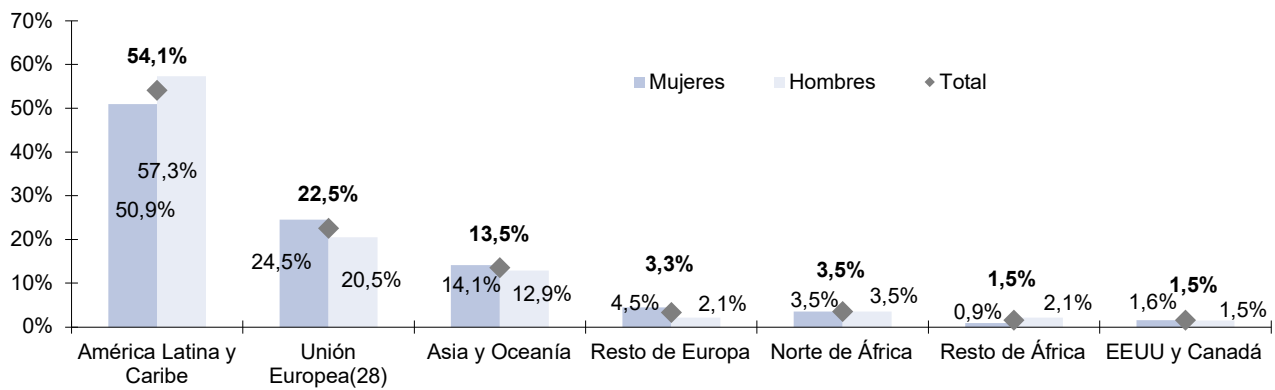

**Gráfico 8.1.11** Distribución del número de estudiantes matriculados en Doctorado por grupos de edad y nacionalidad. Curso 2020-2021<sup>(1)</sup>

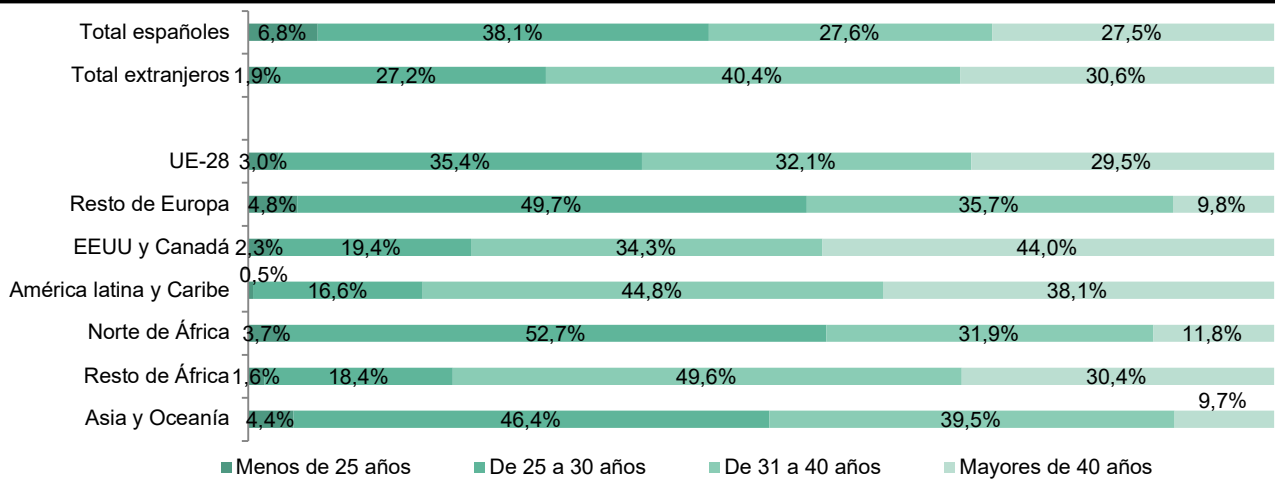

**Gráfico 8.1.12** Distribución del número de estudiantes extranjeros matriculados en Doctorado por comunidad autónoma receptora. Curso 2020-2021<sup>(1)(2)</sup>

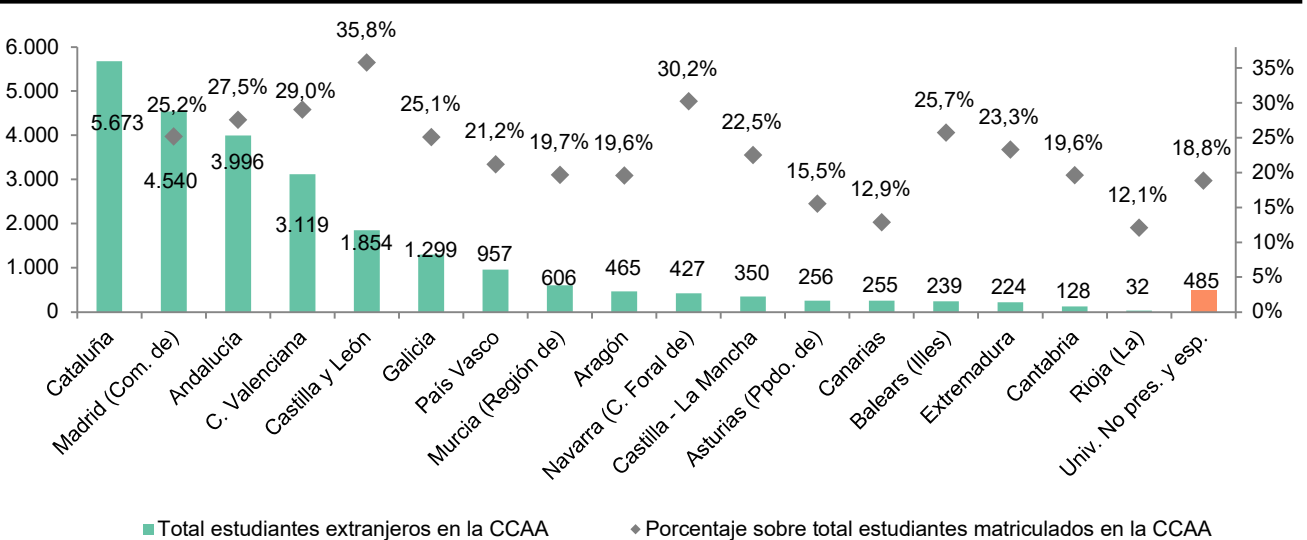

(1) Datos provisionales

(2) Para cada comunidad autónoma sólo se han considerado las universidades presenciales

## 8.2 Internacionalización. Estudiantes internacionales entrantes

**Mapa 8.2.1** Número de estudiantes internacionales por país de procedencia de la UE(28) y por zona. Curso 2019-2020

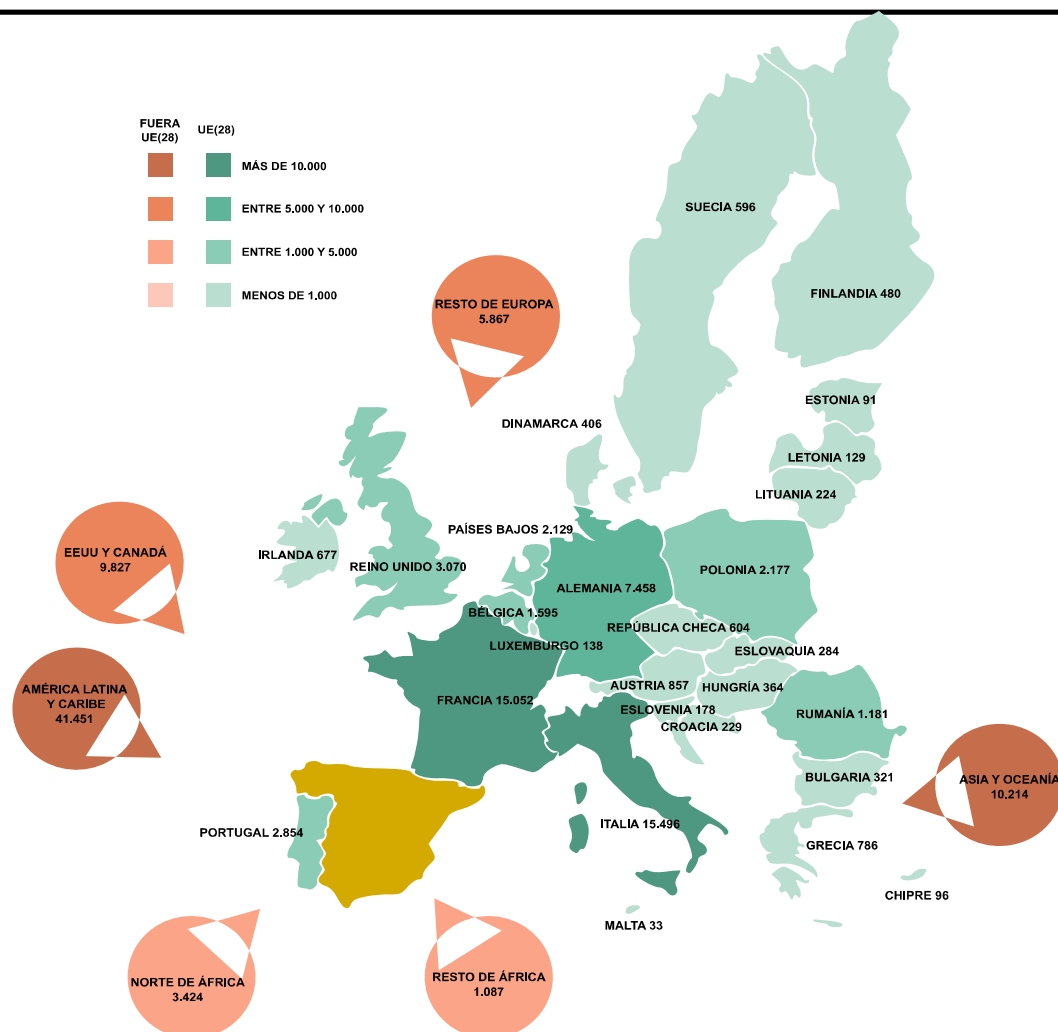

**Tabla 8.2.2** Número de estudiantes internacionales según tipo de movilidad, zona y región. Curso 2019-2020

|                                | Total          | Programas de movilidad | Matrícula ordinaria |
|--------------------------------|----------------|------------------------|---------------------|
| <b>Total</b>                   | <b>129.375</b> | <b>55.593</b>          | <b>73.782</b>       |
| <b>Unión Europea(28)</b>       | <b>57.505</b>  | <b>32.697</b>          | <b>24.808</b>       |
| <b>Resto de Europa</b>         | <b>5.867</b>   | <b>2.344</b>           | <b>3.523</b>        |
| Europa Oeste                   | 2.662          | 728                    | 1.934               |
| Europa Este                    | 3.205          | 1.616                  | 1.589               |
| <b>EEUU y Canadá</b>           | <b>9.827</b>   | <b>7.693</b>           | <b>2.134</b>        |
| <b>América Latina y Caribe</b> | <b>41.451</b>  | <b>9.295</b>           | <b>32.156</b>       |
| Caribe                         | 2.209          | 130                    | 2.079               |
| América Central                | 9.952          | 4.025                  | 5.927               |
| América del Sur                | 29.290         | 5.140                  | 24.150              |
| <b>Norte de África</b>         | <b>3.424</b>   | <b>311</b>             | <b>3.113</b>        |
| <b>Resto de África</b>         | <b>1.087</b>   | <b>144</b>             | <b>943</b>          |
| <b>Asia y Oceanía</b>          | <b>10.214</b>  | <b>3.109</b>           | <b>7.105</b>        |
| Oriente Medio                  | 1.474          | 196                    | 1.278               |
| Asia Central                   | 204            | 94                     | 110                 |
| Asia Meridional                | 1.794          | 154                    | 1.640               |
| Asia Oriental                  | 5.638          | 2.116                  | 3.522               |
| Sureste Asiático               | 742            | 229                    | 513                 |
| Oceanía                        | 392            | 320                    | 72                  |

## 8.2 Internacionalización. Estudiantes internacionales entrantes

**Tabla 8.2.3** Países de origen con mayor número de estudiantes internacionales entrantes en el SUE por tipo de movilidad. Curso 2019-2020 (número de estudiantes)

|                           | Total  | Tipo de movilidad      |                     |
|---------------------------|--------|------------------------|---------------------|
|                           |        | Programas de movilidad | Matrícula ordinaria |
| Italia                    | 15.496 | 9.352                  | 6.144               |
| Francia                   | 14.969 | 5.330                  | 9.639               |
| Estados Unidos de América | 9.004  | 7.136                  | 1.868               |
| Colombia                  | 7.562  | 1.016                  | 6.546               |
| Alemania                  | 7.458  | 5.493                  | 1.965               |
| México                    | 7.222  | 3.868                  | 3.354               |
| Ecuador                   | 6.583  | 94                     | 6.489               |
| Chile                     | 3.699  | 1.223                  | 2.476               |
| China                     | 3.670  | 938                    | 2.732               |
| Perú                      | 3.130  | 607                    | 2.523               |
| Reino Unido               | 3.066  | 1.985                  | 1.081               |
| Brasil                    | 2.937  | 1.028                  | 1.909               |
| Portugal                  | 2.854  | 1.010                  | 1.844               |
| Marruecos                 | 2.515  | 103                    | 2.412               |
| Argentina                 | 2.344  | 923                    | 1.421               |

**Tabla 8.2.4** Número de estudiantes internacionales entrantes en el SUE por comunidad autónoma y tipo de movilidad. Curso 2019-2020

|                              | Total          | Tipo de movilidad      |                     |
|------------------------------|----------------|------------------------|---------------------|
|                              |                | Programas de movilidad | Matrícula ordinaria |
| <b>Total</b>                 | <b>129.375</b> | <b>55.593</b>          | <b>73.782</b>       |
| Andalucía                    | 19.400         | 11.086                 | 8.314               |
| Aragón                       | 2.000          | 1.123                  | 877                 |
| Asturias (Principado de)     | 1.077          | 778                    | 299                 |
| Balears (Illes)              | 630            | 331                    | 299                 |
| Canarias                     | 1.417          | 1.038                  | 379                 |
| Cantabria                    | 1.846          | 479                    | 1.367               |
| Castilla - La Mancha         | 1.207          | 782                    | 425                 |
| Castilla y León              | 10.182         | 2.931                  | 7.251               |
| Cataluña                     | 29.029         | 11.044                 | 17.985              |
| Comunitat Valenciana         | 16.467         | 6.251                  | 10.216              |
| Extremadura                  | 772            | 478                    | 294                 |
| Galicia                      | 3.726          | 1.975                  | 1.751               |
| Madrid (Comunidad de)        | 30.207         | 12.709                 | 17.498              |
| Murcia (Región de)           | 3.293          | 1.436                  | 1.857               |
| Navarra (Comunidad Foral de) | 4.334          | 910                    | 3.424               |
| País Vasco                   | 3.669          | 2.144                  | 1.525               |
| Rioja (La)                   | 119            | 98                     | 21                  |

## 8.3 Internacionalización. Estudiantes internacionales<sup>(1)</sup> salientes por programa

**Tabla 8.3.1** Número de estudiantes universitarios españoles que han salido a través de programas de movilidad por nivel académico, sexo y grupo de edad. Curso 2019-2020

|                       | Total  | % Mujeres | Rango de edad |       |       |             |
|-----------------------|--------|-----------|---------------|-------|-------|-------------|
|                       |        |           | 18-21         | 22-25 | 26-30 | Mayor de 30 |
| Total                 | 42.253 | 58,6%     | 63,1%         | 33,0% | 3,1%  | 0,7%        |
| Grado y 1º y 2º ciclo | 39.791 | 60,0%     | 67,0%         | 30,0% | 2,5%  | 0,5%        |
| Máster                | 2.462  | 35,9%     | 0,4%          | 81,6% | 13,3% | 4,7%        |

**Mapa 8.3.2** Número de estudiantes salientes del SUE a través de programas de movilidad por país en la UE(28) y por zonas. Curso 2019-2020

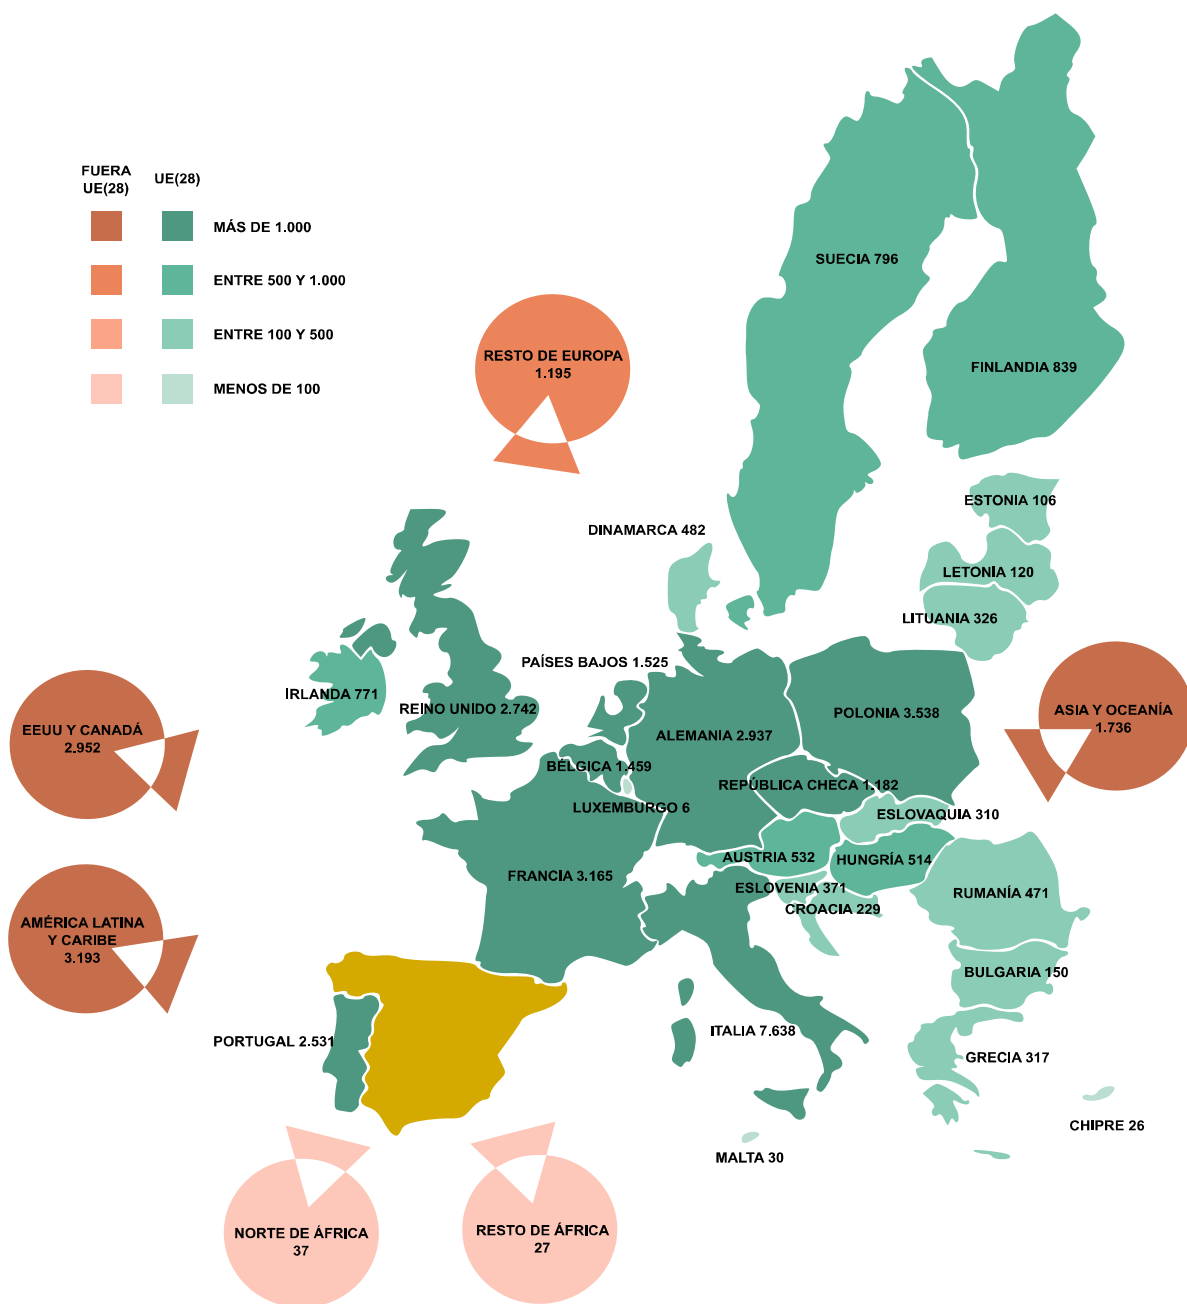

(1) Estudiantes internacionales de Grado y Máster

## 8.3 Internacionalización. Estudiantes internacionales<sup>(1)</sup> salientes por programa

**Tabla 8.3.3** Número de estudiantes que salen del SUE a través de programas de movilidad por tipo de universidad de origen y región de destino. Curso 2019-2020

|                                | Total         | Universidades públicas | Universidades privadas |
|--------------------------------|---------------|------------------------|------------------------|
| <b>Total</b>                   | <b>42.253</b> | <b>35.006</b>          | <b>7.247</b>           |
| <b>Unión Europea(28)</b>       | <b>33.113</b> | <b>28.958</b>          | <b>4.155</b>           |
| <b>Resto de Europa</b>         | <b>1.195</b>  | <b>1.023</b>           | <b>172</b>             |
| Resto de Europa. Oeste         | 858           | 712                    | 146                    |
| Resto de Europa. Este          | 337           | 311                    | 26                     |
| <b>EEUU y Canadá</b>           | <b>2.952</b>  | <b>1.406</b>           | <b>1.546</b>           |
| <b>América Latina y Caribe</b> | <b>3.193</b>  | <b>2.530</b>           | <b>663</b>             |
| Caribe                         | 89            | 75                     | 14                     |
| América Central                | 923           | 739                    | 184                    |
| América del Sur                | 2.181         | 1.716                  | 465                    |
| <b>Norte de África</b>         | <b>37</b>     | <b>34</b>              | <b>3</b>               |
| <b>Resto de África</b>         | <b>27</b>     | <b>17</b>              | <b>10</b>              |
| <b>Asia y Oceanía</b>          | <b>1.736</b>  | <b>1.038</b>           | <b>698</b>             |
| Oriente Medio                  | 68            | 34                     | 34                     |
| Asia Central                   | 1             |                        | 1                      |
| Asia Meridional                | 108           | 12                     | 96                     |
| Asia Oriental                  | 1.039         | 690                    | 349                    |
| Sureste Asiático               | 196           | 78                     | 118                    |
| <b>Oceanía</b>                 | <b>324</b>    | <b>224</b>             | <b>100</b>             |

**Tabla 8.3.4** Número de estudiantes que salen del SUE a través de un programa de movilidad. Principales países de destino por tipo de universidad de procedencia. Curso 2019-2020

|                           | Total | Universidades públicas | Universidades privadas |
|---------------------------|-------|------------------------|------------------------|
| Italia                    | 7.638 | 91,4%                  | 8,6%                   |
| Francia                   | 3.538 | 93,0%                  | 7,0%                   |
| Polonia                   | 3.165 | 84,5%                  | 15,5%                  |
| Reino Unido               | 2.937 | 82,3%                  | 17,7%                  |
| Alemania                  | 2.742 | 78,8%                  | 21,2%                  |
| Portugal                  | 2.531 | 91,0%                  | 9,0%                   |
| Estados Unidos de América | 2.450 | 45,1%                  | 54,9%                  |
| Países Bajos              | 1.525 | 77,7%                  | 22,3%                  |
| Bélgica                   | 1.459 | 88,1%                  | 11,9%                  |
| República Checa           | 1.182 | 85,1%                  | 14,9%                  |
| Finlandia                 | 865   | 77,7%                  | 22,3%                  |
| Chile                     | 840   | 81,7%                  | 18,3%                  |
| México                    | 839   | 82,6%                  | 17,4%                  |
| Suecia                    | 796   | 84,8%                  | 15,2%                  |
| Irlanda                   | 771   | 83,5%                  | 16,5%                  |

(1) Estudiantes internacionales de Grado y Máster





## 9. Becas y ayudas al estudio

### BECAS Y AYUDAS AL ESTUDIO DE LA AGE

Para el año 2020 el presupuesto ejecutado en becas y ayudas al estudio en el ámbito universitario y no universitario por la AGE fue de 1.664.722 miles de euros. Este presupuesto se destina a cubrir las necesidades económicas de los más desfavorecidos. La convocatoria general destinada a estudiantes universitarios consta principalmente del pago de tasas universitarias, una ayuda fija ligada a la renta familiar (1.600 euros), una ayuda fija ligada a la necesidad de un cambio de residencia (1.500 euros), una ayuda de cuantía variable en función de la renta familiar y el rendimiento académico y una cuantía relacionada con la excelencia académica que oscila entre los 50 y los 125 euros.

En el curso 2019-2020 hubo un total de 321.750 beneficiarios universitarios de la convocatoria general de la AGE, de los cuales el 90,7% eran estudiantes de Grado. Esta convocatoria destinó un total de 256.799.838,7 euros para cubrir las necesidades de matrícula, 143.240.400 euros para compensar las rentas familiares más bajas, 126.996.000 euros para compensar un cambio de residencia, 301.461.208,6 euros para la cuantía variable y 6.180.537,5 euros para premiar la excelencia académica.

Del total de beneficiarios de la convocatoria general de la AGE el 36% pertenecía al umbral 1 (el más bajo de renta familiar), el 59,9% al umbral 2 y un 4,1% al umbral 3 (el de rentas familiares mayores).

### BECA GENERAL DE LA AGE Y DEL PAÍS VASCO

En el curso 2019-2020, el 40,7% de los estudiantes de nuevo ingreso en el SUE en estudios de Grado fue beneficiario de una beca en esta convocatoria. Entre todos los matriculados en Grado el porcentaje de beneficiarios de del 26,6%.

Varios de los indicadores académicos calculados presentan mejores valores para la población becaria, 9,3% mejor rendimiento académico y un 8,4% menos de abandono el primer año.

### BECAS Y AYUDAS AL ESTUDIO DE LAS COMUNIDADES AUTÓNOMAS Y LAS UNIVERSIDADES

Las comunidades autónomas y las universidades concedieron un total de 256.236.286,8 euros en concepto de becas y ayudas al estudio. Estas becas, por lo general, intentan cubrir necesidades adicionales de los estudiantes o bien complementar las ayudas concedidas por la AGE.

#### Notas

(1) **Indicadores académicos de becarios y no becarios:** Para el cálculo de los indicadores académicos de becarios y no becarios se han tenido en cuenta los beneficiarios de la convocatoria general de la AGE y del País Vasco.

(2) **Umbrales:** El umbral de renta familiar determina los tipos de ayuda a los que podría acceder un estudiante en función de su renta familiar. Los umbrales están ordenados de manera que el umbral 1 se corresponde con las rentas familiares más bajas y el umbral 3 con las más altas. Para profundizar en el proceso de concesión de las becas generales del estado, ver el RD 430/2019 y la convocatoria correspondiente.

(3) **Financiación de las becas convocadas por las comunidades autónomas y las universidades:** Se han incluido en este informe becas convocadas por las comunidades autónomas y las universidades independientemente de si la financiación es pública o privada.

(4) **Complementarias de becas Erasmus:** No se incluyen en este capítulo las becas Erasmus financiadas por el la Unión Europea que gestiona el SEPIE.

(5) No se han incluido entre los beneficiarios de becas generales de la AGE aquellos que realizan el curso de acceso a la universidad para mayores de 25 años.

#### Referencias

[ANEXO I: Definiciones](#)

[Estadística de Becas y Ayudas al Estudio](#)

[Ministerio de Educación y Formación Profesional: Datos y cifras. Curso escolar 2020-21.](#)

[Sistema Integrado de Información Universitaria](#)

**La convocatoria general de la AGE en el ámbito universitario del curso 2019-2020 otorgó un total de 839.280,3 miles de euros.**

**Varios de los indicadores académicos calculados presentan mejores valores para la población becaria, 9,3% mejor rendimiento académico y un 8,4% menos de abandono el primer año.**

## 9.1 Becas y ayudas al estudio de la AGE

**Gráfico 9.1.1** Evolución del presupuesto inicial y del presupuesto ejecutado destinado a becas y ayudas a estudiantes universitarios y no universitarios (en miles de euros)<sup>1</sup>.

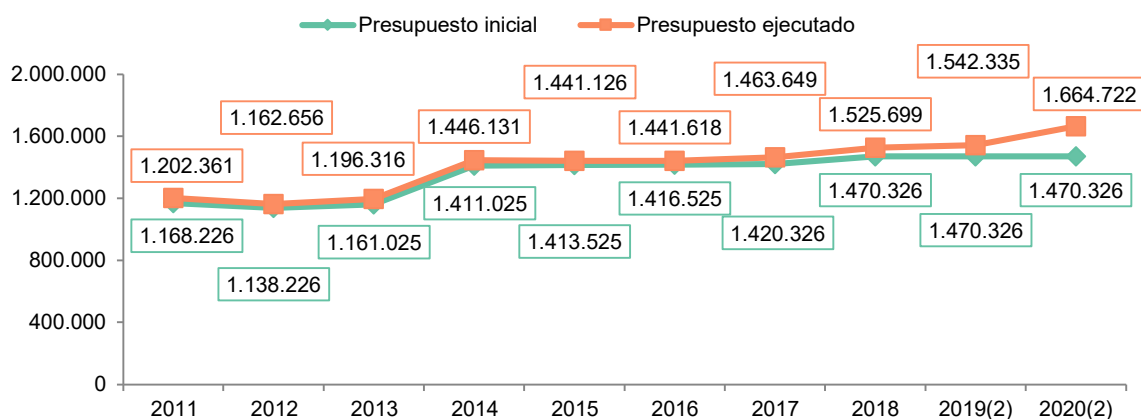

**Gráfico 9.1.2** Distribución del número de becarios y el importe ejecutado (€) en la convocatoria general de la AGE para niveles universitarios. Curso 2019-2020.

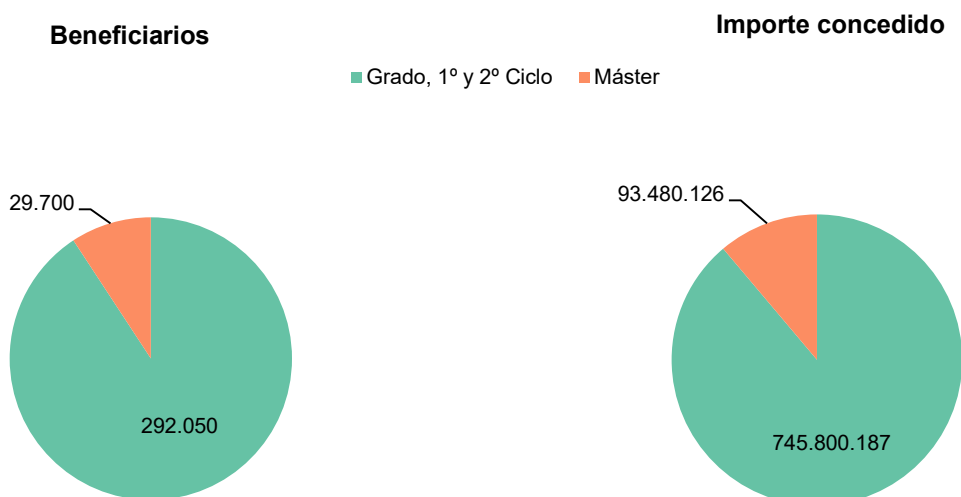

**Tabla 9.1.3** Distribución del número de beneficiarios y del importe total de las becas en el nivel universitario por tipo de ayuda concedida. Convocatoria general de la AGE. Curso 2019-2020.

|                                                              | Beneficiarios | Importe total (€) | Distribución de las cuantías principales |
|--------------------------------------------------------------|---------------|-------------------|------------------------------------------|
| <b>Cuantía fijas</b>                                         |               |                   |                                          |
| Becas de matrícula                                           | 321.750       | 256.799.838,7     |                                          |
| Cuantía fija ligada a la renta                               | 90.006        | 143.240.400,0     |                                          |
| Cuantía fija ligada a la residencia                          | 84.986        | 126.996.000,0     |                                          |
| <b>Cuantía variable</b>                                      |               |                   |                                          |
| Cuantía variable mínima (60€)                                | 22.230        | 1.333.800,0       |                                          |
| Cuantía variable por coeficiente                             | 242.112       | 300.127.408,6     |                                          |
| <b>Excelencia académica</b>                                  |               |                   |                                          |
| Cuantías adicionales por domicilio insular o Ceuta y Melilla | 87.794        | 6.180.537,5       |                                          |
|                                                              | 6.013         | 4.602.328,5       |                                          |

(1) Datos y cifras. Curso escolar 2020-2021. Ministerio de Educación y Formación Profesional.

(2) Presupuesto prorrogado

## 9.1 Becas y ayudas al estudio de la AGE

**Tabla 9.1.4** Número de beneficiarios e importe medio concedido en Grado y 1<sup>er</sup> y 2<sup>o</sup> Ciclo. Curso 2019-2020.

|                               | Número de beneficiarios |                                                         |                        | Importe medio concedido (€)    |                   |                                        |
|-------------------------------|-------------------------|---------------------------------------------------------|------------------------|--------------------------------|-------------------|----------------------------------------|
|                               | Número de beneficiarios | Porcentaje de beneficiarios por tipo de ayuda concedida |                        | Estudiantes con beca económica |                   | Estudiantes con sólo beca de matrícula |
|                               |                         | Beca económica                                          | Sólo beca de matrícula | Beca económica                 | Beca de matrícula |                                        |
| Total                         | <b>292.050</b>          | <b>82,1%</b>                                            | <b>17,9%</b>           | <b>2.185,31</b>                | <b>764,54</b>     | <b>741,41</b>                          |
| Ciencias Sociales y Jurídicas | 135.201                 | 82,2%                                                   | 17,8%                  | 2.186,53                       | 697,36            | 690,78                                 |
| Ingeniería y Arquitectura     | 44.000                  | 75,3%                                                   | 24,7%                  | 1.962,13                       | 830,15            | 793,97                                 |
| Artes y Humanidades           | 30.449                  | 82,8%                                                   | 17,2%                  | 2.311,30                       | 695,89            | 695,99                                 |
| Ciencias de la Salud          | 59.344                  | 88,4%                                                   | 11,6%                  | 2.269,22                       | 885,51            | 890,36                                 |
| Ciencias                      | 23.056                  | 77,0%                                                   | 23,0%                  | 2.167,25                       | 802,41            | 715,60                                 |

**Tabla 9.1.5** Número de beneficiarios e importe medio concedido en Máster. Curso 2019-2020.

|                               | Número de beneficiarios |                                                         |                        | Importe medio concedido (€)    |                   |                                        |
|-------------------------------|-------------------------|---------------------------------------------------------|------------------------|--------------------------------|-------------------|----------------------------------------|
|                               | Número de beneficiarios | Porcentaje de beneficiarios por tipo de ayuda concedida |                        | Estudiantes con beca económica |                   | Estudiantes con sólo beca de matrícula |
|                               |                         | Beca económica                                          | Sólo beca de matrícula | Beca económica                 | Beca de matrícula |                                        |
| Total                         | <b>29.700</b>           | <b>97,0%</b>                                            | <b>3,0%</b>            | <b>2.040,21</b>                | <b>1.169,11</b>   | <b>1.175,62</b>                        |
| Ciencias Sociales y Jurídicas | 17.152                  | 97,0%                                                   | 3,0%                   | 1.966,08                       | 1.115,24          | 1.200,83                               |
| Ingeniería y Arquitectura     | 4.760                   | 96,3%                                                   | 3,7%                   | 2.074,02                       | 1.200,17          | 1.117,46                               |
| Artes y Humanidades           | 2.245                   | 96,0%                                                   | 4,0%                   | 2.251,10                       | 1.213,90          | 1.095,67                               |
| Ciencias de la Salud          | 4.064                   | 97,9%                                                   | 2,1%                   | 2.063,16                       | 1.280,44          | 1.220,74                               |
| Ciencias                      | 1.479                   | 97,4%                                                   | 2,6%                   | 2.409,50                       | 1.317,87          | 1.186,99                               |

**Gráfico 9.1.6** Distribución del número de beneficiarios de becas en el nivel universitario por umbral de renta familiar. Curso 2019-2020.

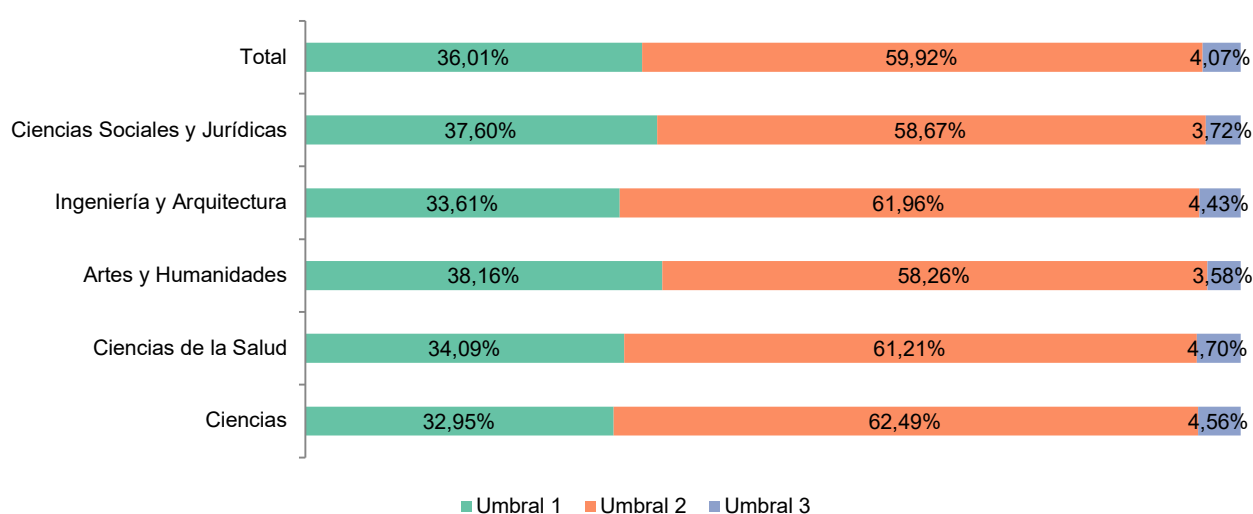

## 9.2 Becas generales de la AGE y el País Vasco

**Gráfico 9.2.1** Relación entre los beneficiarios de becas generales de la AGE o del País Vasco respecto a los estudiantes matriculados y de nuevo ingreso en el SUE en estudios de Grado en universidades presenciales. Curso 2019-2020.

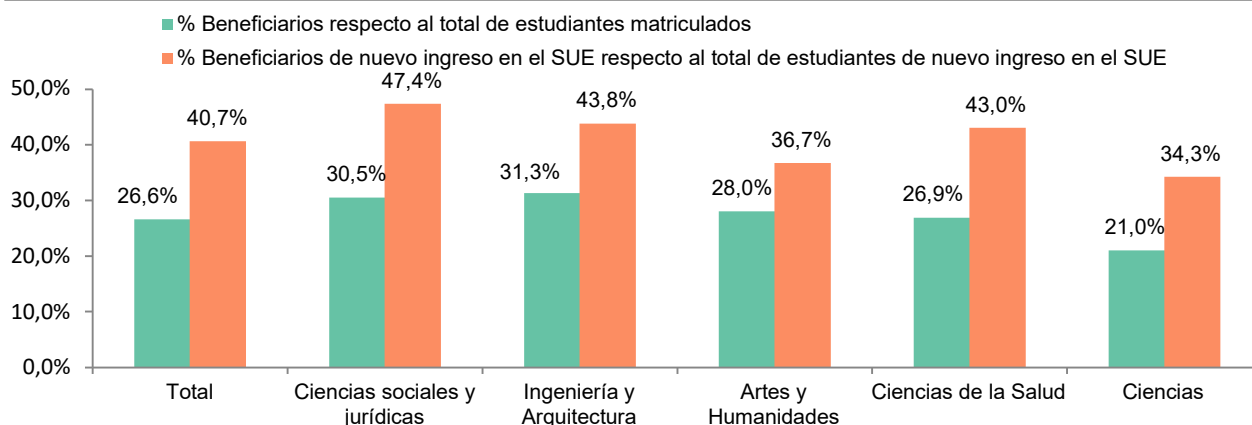

**Tabla 9.2.2** Porcentaje de beneficiarios de becas generales de la AGE o del País Vasco en Grado que pierden la beca tras su primer o segundo curso.

|                               | Cohorte de entrada 2018-2019 |  | Cohorte de entrada 2017-2018 |                       |
|-------------------------------|------------------------------|--|------------------------------|-----------------------|
|                               | Tras su primer curso         |  | Tras su primer curso         | Tras su segundo curso |
| <b>Total</b>                  | <b>35,6%</b>                 |  | <b>34,6%</b>                 | <b>12,5%</b>          |
| <b>Rama de enseñanza</b>      |                              |  |                              |                       |
| Ciencias Sociales y Jurídicas | 36,6%                        |  | 35,4%                        | 12,6%                 |
| Ingeniería y Arquitectura     | 44,7%                        |  | 44,7%                        | 11,9%                 |
| Artes y Humanidades           | 32,5%                        |  | 29,6%                        | 13,6%                 |
| Ciencias de la Salud          | 27,6%                        |  | 26,5%                        | 11,6%                 |
| Ciencias                      | 33,3%                        |  | 33,1%                        | 14,2%                 |

**Tabla 9.2.3** Distribución del número de estudiantes egresados según el número de años que han sido beneficiarios de becas generales de la AGE o del País Vasco a lo largo de sus estudios. Cohorte de egresados 2019-2020.

|                               | Grado          |                      |                             | Máster         |                      |                             |
|-------------------------------|----------------|----------------------|-----------------------------|----------------|----------------------|-----------------------------|
|                               | Total          | Becarios algún curso | No becarios en ningún curso | Total          | Becarios algún curso | No becarios en ningún curso |
| <b>Total</b>                  | <b>208.302</b> | <b>47,5%</b>         | <b>52,5%</b>                | <b>131.267</b> | <b>21,7%</b>         | <b>78,3%</b>                |
| <b>Rama de enseñanza</b>      |                |                      |                             |                |                      |                             |
| Ciencias Sociales y Jurídicas | 104.416        | 49,0%                | 51,0%                       | 85.373         | 21,0%                | 79,0%                       |
| Ingeniería y Arquitectura     | 31.338         | 41,5%                | 58,5%                       | 17.034         | 20,8%                | 79,2%                       |
| Artes y Humanidades           | 17.766         | 53,4%                | 46,6%                       | 9.099          | 24,7%                | 75,3%                       |
| Ciencias de la Salud          | 42.085         | 44,5%                | 55,5%                       | 13.600         | 25,4%                | 74,6%                       |
| Ciencias                      | 12.697         | 52,0%                | 48,0%                       | 6.161          | 22,5%                | 77,5%                       |

## 9.2 Becas generales de la AGE y del País Vasco

**Gráfico 9.2.4** Relación entre el número de beneficiarios de becas generales de la AGE o del País Vasco y el número de estudiantes matriculados en Grado en universidades presenciales por comunidad autónoma. Curso 2019-2020.

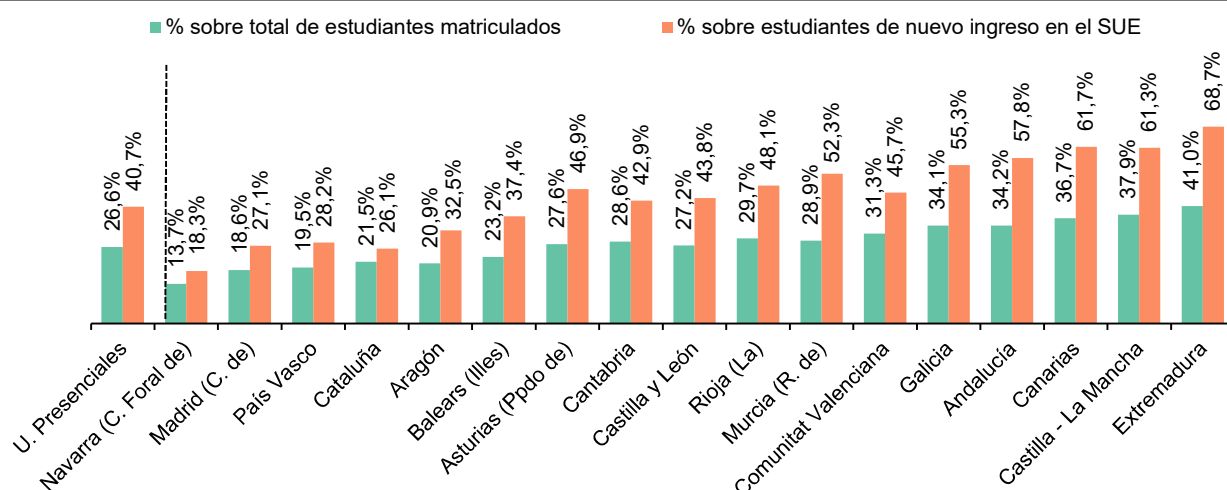

**Gráfico 9.2.5** Distribución del número de estudiantes matriculados y del número de becarios beneficiarios de becas generales de la AGE o del País Vasco en Grado en universidades presenciales por comunidad autónoma. Curso 2019-2020.

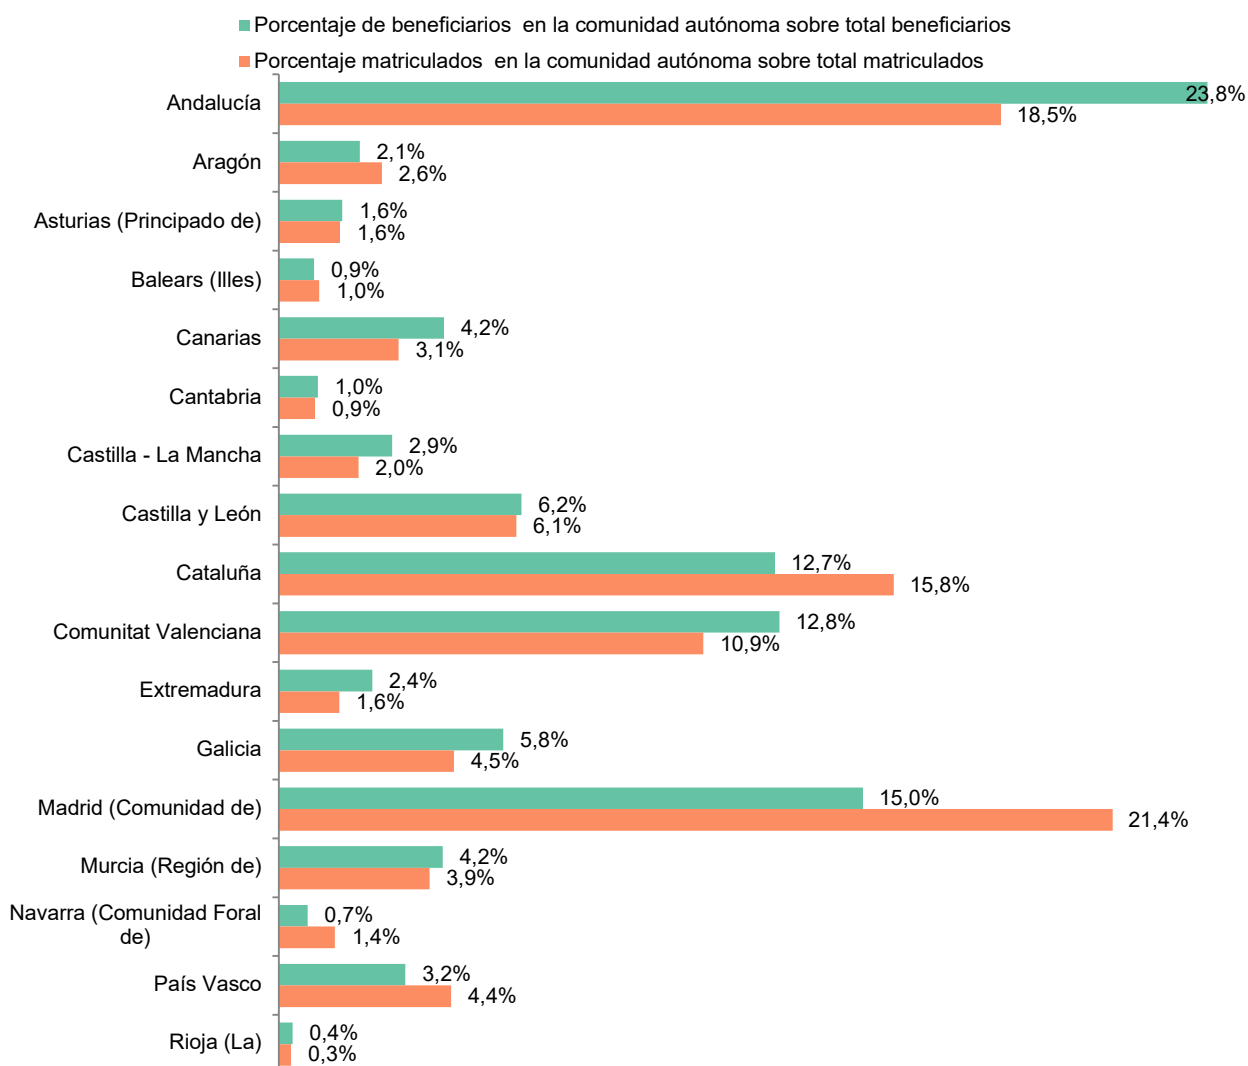

## 9.2 Becas generales de la AGE y del País Vasco

**Gráfico 9.2.6** Relación entre el número de beneficiarios de becas generales de la AGE o del País Vasco y el número de estudiantes matriculados en Máster en universidades presenciales por comunidad autónoma. Curso 2019-2020.

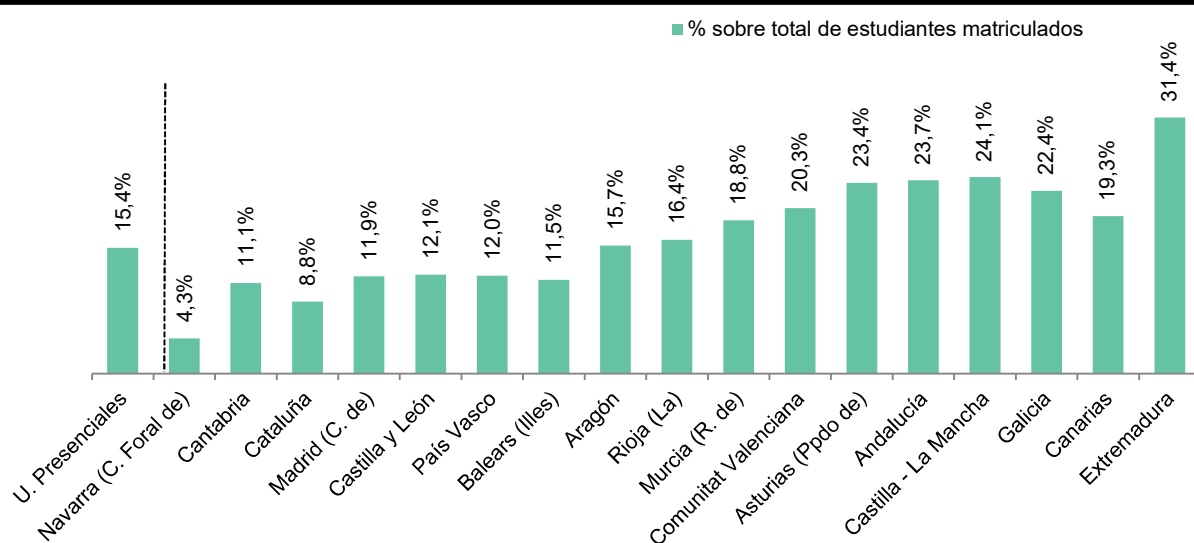

**Gráfico 9.2.7** Distribución del número de estudiantes matriculados y del número de becarios beneficiarios de las becas generales de la AGE o del País Vasco en Máster en universidades presenciales por comunidad autónoma. Curso 2019-2020.

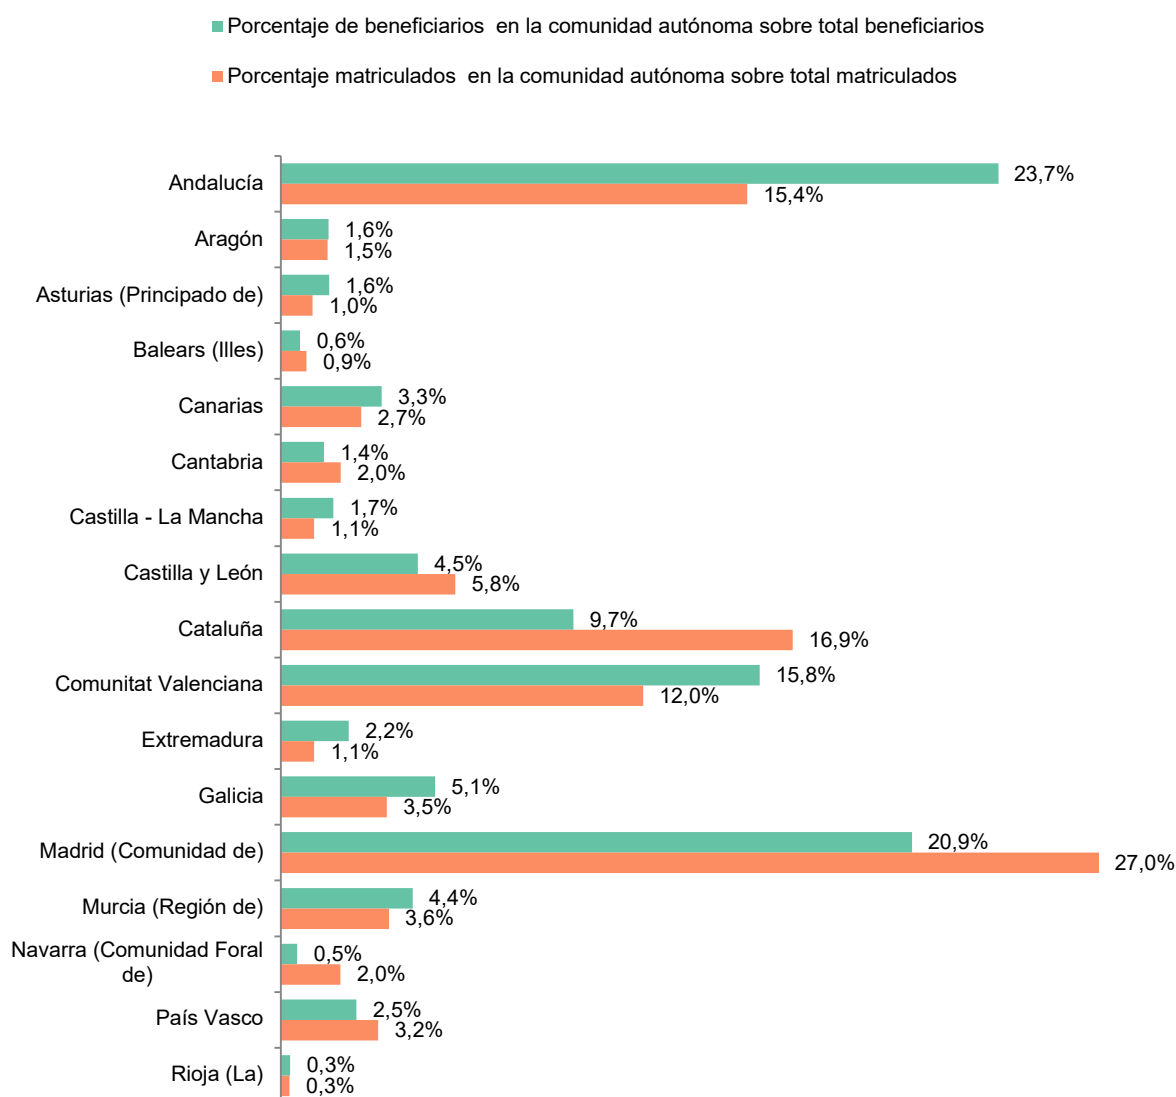

## 9.3 Comparativa de indicadores entre becarios y no becarios. Grado

**Tabla 9.3.1** Últimos valores disponibles de los principales indicadores académicos de los estudiantes de Grado por condición de becarios beneficiarios de la convocatoria general de la AGE o del País Vasco y rama de enseñanza.

|                                                                                            |              | Total        | C. Sociales y Jurídicas | Ingeniería y Arquitectura | Artes y Humanidades | Ciencias de la Salud | Ciencias     |
|--------------------------------------------------------------------------------------------|--------------|--------------|-------------------------|---------------------------|---------------------|----------------------|--------------|
| Número medio de créditos matriculados 2019-20                                              | <b>Total</b> | <b>51,1</b>  | <b>51,5</b>             | <b>49,7</b>               | <b>46,7</b>         | <b>53,5</b>          | <b>52,0</b>  |
|                                                                                            | Becarios     | 59,3         | 59,7                    | 57,6                      | 59,3                | 59,6                 | 58,7         |
|                                                                                            | No becarios  | 48,7         | 49,0                    | 47,9                      | 42,9                | 51,6                 | 49,5         |
| Número medio de créditos presentados 2019-20                                               | <b>Total</b> | <b>47,0</b>  | <b>47,8</b>             | <b>43,7</b>               | <b>41,3</b>         | <b>51,1</b>          | <b>47,5</b>  |
|                                                                                            | Becarios     | 57,2         | 58,2                    | 52,9                      | 56,9                | 58,6                 | 56,1         |
|                                                                                            | No becarios  | 44,0         | 44,8                    | 41,5                      | 36,7                | 48,7                 | 44,1         |
| Número medio de créditos aprobados 2019-20                                                 | <b>Total</b> | <b>43,2</b>  | <b>44,5</b>             | <b>37,0</b>               | <b>38,5</b>         | <b>48,5</b>          | <b>42,7</b>  |
|                                                                                            | Becarios     | 54,2         | 55,8                    | 46,1                      | 54,5                | 56,9                 | 51,8         |
|                                                                                            | No becarios  | 40,0         | 41,2                    | 34,8                      | 33,7                | 45,8                 | 39,2         |
| Tasa de rendimiento 2019-20 (%)                                                            | <b>Total</b> | <b>84,6%</b> | <b>86,5%</b>            | <b>74,4%</b>              | <b>82,5%</b>        | <b>90,6%</b>         | <b>82,0%</b> |
|                                                                                            | Becarios     | 91,4%        | 93,4%                   | 80,1%                     | 91,9%               | 95,6%                | 88,2%        |
|                                                                                            | No becarios  | 82,1%        | 83,9%                   | 72,8%                     | 78,6%               | 88,7%                | 79,2%        |
| Abandono del estudio en 1º año. Cohorte de nuevo ingreso 2017-18 (%)                       | <b>Total</b> | <b>21,3%</b> | <b>20,3%</b>            | <b>25,0%</b>              | <b>27,5%</b>        | <b>16,6%</b>         | <b>21,7%</b> |
|                                                                                            | Becarios     | 15,2%        | 14,1%                   | 21,7%                     | 17,2%               | 10,5%                | 16,3%        |
|                                                                                            | No becarios  | 23,6%        | 22,6%                   | 26,2%                     | 31,5%               | 18,8%                | 24,4%        |
| Cambio de estudio en 1º año. Cohorte de nuevo ingreso 2017-18 (%)                          | <b>Total</b> | <b>8,3%</b>  | <b>7,3%</b>             | <b>11,1%</b>              | <b>9,1%</b>         | <b>7,0%</b>          | <b>11,3%</b> |
|                                                                                            | Becarios     | 7,8%         | 6,6%                    | 11,1%                     | 8,0%                | 6,7%                 | 10,2%        |
|                                                                                            | No becarios  | 8,5%         | 7,6%                    | 11,1%                     | 9,5%                | 7,1%                 | 11,8%        |
| Duración media de estudios de Grado. Cohorte de egresados 2019-20 (años). Grados de 4 años | <b>Total</b> | <b>4,93</b>  | <b>4,86</b>             | <b>5,54</b>               | <b>5,01</b>         | <b>4,53</b>          | <b>5,02</b>  |
|                                                                                            | Becarios     | 4,86         | 4,77                    | 5,64                      | 4,88                | 4,45                 | 5,07         |
|                                                                                            | No becarios  | 5,00         | 4,96                    | 5,45                      | 5,16                | 4,62                 | 4,96         |
| Nota media del expediente. Cohorte de egresados 2019-20                                    | <b>Total</b> | <b>7,27</b>  | <b>7,29</b>             | <b>6,86</b>               | <b>7,44</b>         | <b>7,49</b>          | <b>7,13</b>  |
|                                                                                            | Becarios     | 7,32         | 7,36                    | 6,87                      | 7,43                | 7,57                 | 7,08         |
|                                                                                            | No becarios  | 7,22         | 7,22                    | 6,86                      | 7,46                | 7,42                 | 7,18         |

**Tabla 9.3.2** Comparativa de las tasas de rendimiento, éxito y evaluación en Grado de los estudiantes becarios y no becarios de becas generales de la AGE y País Vasco. Curso 2019-2020.

|                               | Becarios     |              |              | No becarios  |              |              |
|-------------------------------|--------------|--------------|--------------|--------------|--------------|--------------|
|                               | Rendimiento  | Éxito        | Evaluación   | Rendimiento  | Éxito        | Evaluación   |
| <b>Total</b>                  | <b>91,4%</b> | <b>94,7%</b> | <b>96,5%</b> | <b>82,1%</b> | <b>90,8%</b> | <b>90,5%</b> |
| <b>Tipo de universidad</b>    |              |              |              |              |              |              |
| <b>Universidades públicas</b> | <b>91,2%</b> | <b>94,6%</b> | <b>96,4%</b> | <b>80,3%</b> | <b>89,8%</b> | <b>89,4%</b> |
| Presencial                    | 91,5%        | 94,7%        | 96,6%        | 82,5%        | 90,0%        | 91,7%        |
| No presencial                 | 71,6%        | 89,7%        | 79,9%        | 57,3%        | 87,5%        | 65,4%        |
| <b>Universidades privadas</b> | <b>95,3%</b> | <b>96,7%</b> | <b>98,5%</b> | <b>89,2%</b> | <b>94,3%</b> | <b>94,6%</b> |
| Presencial                    | 95,6%        | 96,7%        | 98,9%        | 91,0%        | 94,2%        | 96,5%        |
| No presencial                 | 93,5%        | 96,8%        | 96,6%        | 81,7%        | 94,6%        | 86,3%        |

### 9.3 Comparativa de indicadores entre becarios y no becarios. Grado

**Gráfico 9.3.3** Evolución de la tasa de abandono y cambio de estudio el 1º año en las cohortes de nuevo ingreso de becarios y no becarios de la convocatoria general de la AGE o del País Vasco en estudios de Grado.

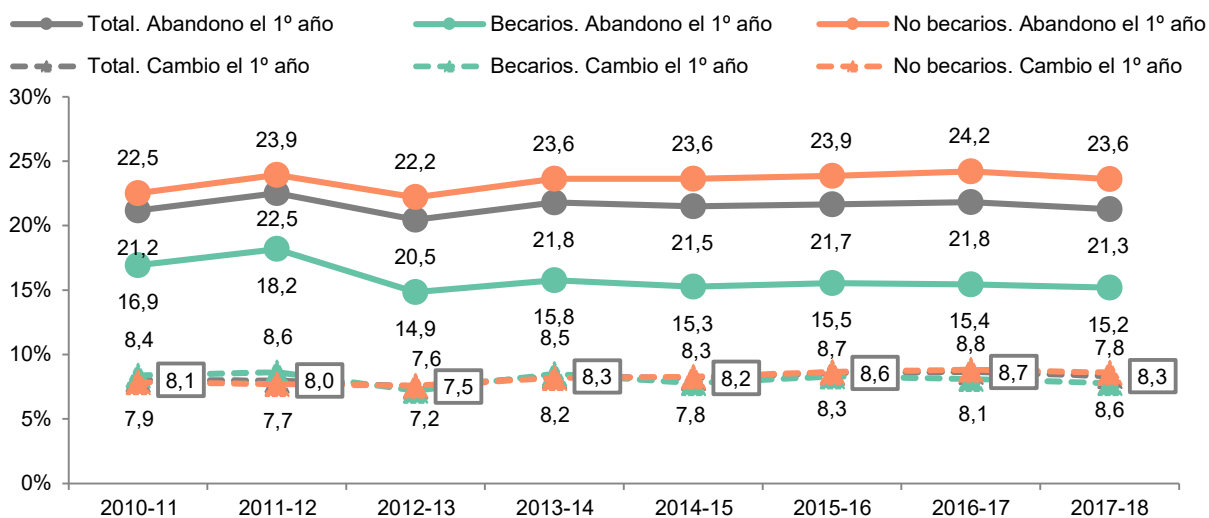

**Gráfico 9.3.4** Evolución de la tasa de rendimiento de los alumnos matriculados por condición de becarios y no becarios de la convocatoria general de la AGE o del País Vasco en estudios de Grado.

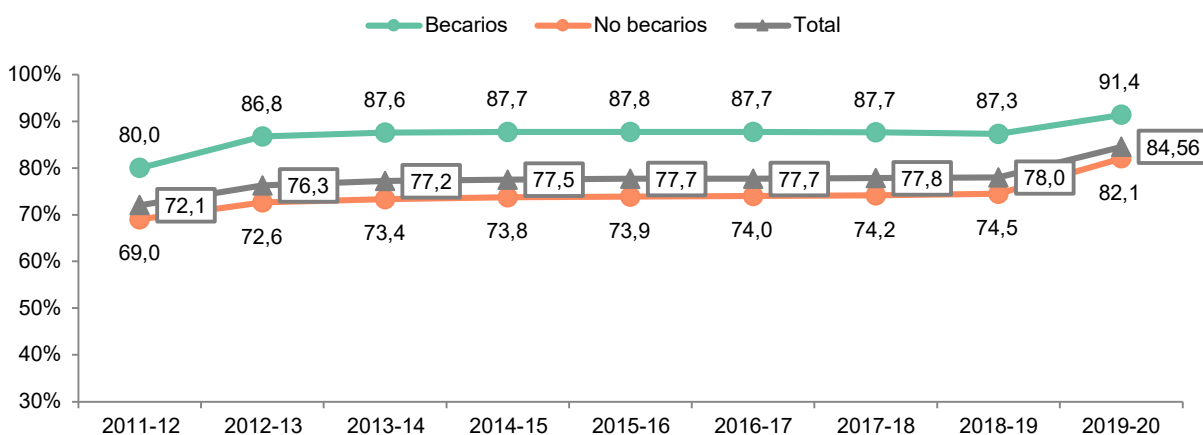

**Gráfico 9.3.5** Evolución de la nota media del expediente de los graduados becarios y no becarios de la convocatoria general de la AGE o del País Vasco en estudios de Grado.

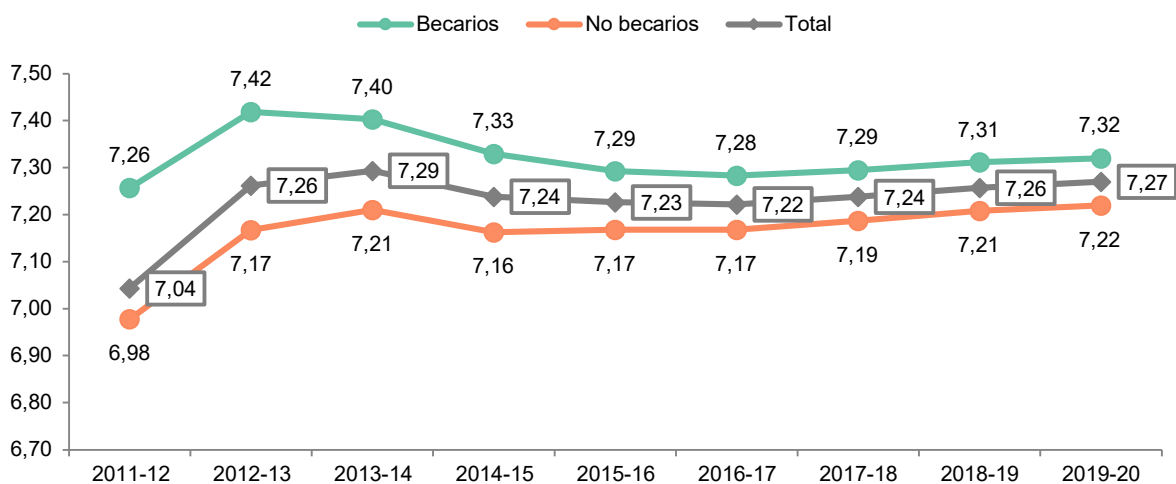



## 9.3 Comparativa de indicadores entre becarios y no becarios. Grado

**Tabla 9.3.6** Comparativa de la tasa de rendimiento por condición de becarios y no becarios de la convocatoria general de la AGE o del País Vasco en Grado por ámbito de estudio. Curso 2019-2020.

|                                                                         | Total        | Estudiantes becarios | Estudiantes no becarios |
|-------------------------------------------------------------------------|--------------|----------------------|-------------------------|
| <b>Total</b>                                                            | <b>84,6%</b> | <b>91,4%</b>         | <b>82,1%</b>            |
| <b>Ámbitos de estudio</b>                                               |              |                      |                         |
| <b>Total Educación</b>                                                  | <b>93,5%</b> | <b>97,1%</b>         | <b>91,3%</b>            |
| Formación de docentes de enseñanza infantil                             | 94,9%        | 97,6%                | 92,9%                   |
| Formación de docentes de enseñanza primaria                             | 94,1%        | 97,2%                | 92,5%                   |
| Otra Formación de personal docente y ciencias de la educación           | 89,4%        | 96,1%                | 84,7%                   |
| <b>Total Artes y humanidades</b>                                        | <b>83,8%</b> | <b>92,4%</b>         | <b>80,2%</b>            |
| Técnicas audiovisuales y medios de comunicación                         | 90,9%        | 95,9%                | 89,2%                   |
| Artes                                                                   | 85,2%        | 93,0%                | 81,9%                   |
| Lenguas                                                                 | 83,2%        | 91,9%                | 78,7%                   |
| Humanidades                                                             | 78,4%        | 90,0%                | 74,6%                   |
| <b>Total Ciencias sociales, periodismo y documentación</b>              | <b>83,4%</b> | <b>92,3%</b>         | <b>80,4%</b>            |
| Psicología                                                              | 82,4%        | 92,4%                | 79,2%                   |
| Economía                                                                | 77,4%        | 87,0%                | 75,0%                   |
| Otras Ciencias sociales y del comportamiento                            | 84,5%        | 92,9%                | 81,5%                   |
| Periodismo e información                                                | 90,1%        | 94,9%                | 88,0%                   |
| <b>Total Negocios, administración y derecho</b>                         | <b>82,6%</b> | <b>89,1%</b>         | <b>81,0%</b>            |
| Administración y gestión de empresas                                    | 81,1%        | 87,1%                | 79,7%                   |
| Otra Educación comercial y empresarial                                  | 84,8%        | 90,6%                | 82,9%                   |
| Derecho                                                                 | 83,5%        | 90,9%                | 81,8%                   |
| <b>Total Ciencias</b>                                                   | <b>82,3%</b> | <b>88,4%</b>         | <b>79,6%</b>            |
| Ciencias de la vida                                                     | 88,0%        | 92,0%                | 85,9%                   |
| Ciencias Físicas, químicas, geológicas                                  | 77,9%        | 84,1%                | 75,3%                   |
| Matemáticas y Estadística                                               | 76,2%        | 84,9%                | 73,8%                   |
| <b>Total Informática</b>                                                | <b>73,6%</b> | <b>81,4%</b>         | <b>70,6%</b>            |
| Informática                                                             | 73,6%        | 81,4%                | 70,6%                   |
| <b>Total Ingeniería, industria y construcción</b>                       | <b>74,3%</b> | <b>79,6%</b>         | <b>72,8%</b>            |
| Ingenierías                                                             | 74,4%        | 79,6%                | 73,0%                   |
| Arquitectura y construcción                                             | 73,6%        | 79,7%                | 72,0%                   |
| <b>Total Agricultura, ganadería, silvicultura, pesca, y veterinaria</b> | <b>82,7%</b> | <b>87,4%</b>         | <b>81,5%</b>            |
| Agricultura, ganadería y pesca                                          | 72,7%        | 79,9%                | 70,5%                   |
| Veterinaria                                                             | 91,0%        | 94,7%                | 90,1%                   |
| <b>Total Salud y servicios sociales</b>                                 | <b>92,9%</b> | <b>96,5%</b>         | <b>91,4%</b>            |
| Medicina                                                                | 95,2%        | 98,0%                | 94,5%                   |
| Enfermería y atención a enfermos                                        | 95,3%        | 97,6%                | 93,7%                   |
| Otras ciencias de la Salud                                              | 90,6%        | 94,6%                | 89,3%                   |
| Trabajo social y orientación                                            | 89,6%        | 96,0%                | 85,0%                   |
| <b>Total Servicios</b>                                                  | <b>86,4%</b> | <b>93,1%</b>         | <b>84,0%</b>            |
| Deportes                                                                | 90,0%        | 95,7%                | 87,8%                   |
| Turismo y Hostelería                                                    | 82,7%        | 91,2%                | 80,0%                   |
| Otros Servicios                                                         | 86,3%        | 88,1%                | 85,8%                   |

### 9.3 Comparativa de indicadores entre becarios y no becarios. Máster

**Tabla 9.3.7** Últimos valores disponibles de los principales indicadores académicos de los estudiantes de Máster por condición becarios y no becarios de la convocatoria general de la AGE o del País Vasco y por rama de enseñanza.

|                                                                                            |              | Total        | C. Sociales y Jurídicas | Ingeniería y Arquitectura | Artes y Humanidades | Ciencias de la Salud | Ciencias     |
|--------------------------------------------------------------------------------------------|--------------|--------------|-------------------------|---------------------------|---------------------|----------------------|--------------|
| Número medio de créditos matriculados 2018-19                                              | <b>Total</b> | <b>44,0</b>  | <b>44,6</b>             | <b>41,8</b>               | <b>40,5</b>         | <b>45,6</b>          | <b>48,4</b>  |
|                                                                                            | Becarios     | 54,2         | 54,4                    | 53,7                      | 56,3                | 52,4                 | 56,0         |
|                                                                                            | No becarios  | 42,6         | 43,4                    | 40,1                      | 38,6                | 44,3                 | 47,0         |
| Número medio de créditos presentados 2018-19                                               | <b>Total</b> | <b>40,3</b>  | <b>41,5</b>             | <b>36,9</b>               | <b>35,1</b>         | <b>42,5</b>          | <b>44,2</b>  |
|                                                                                            | Becarios     | 51,9         | 52,6                    | 49,4                      | 52,5                | 51,0                 | 54,4         |
|                                                                                            | No becarios  | 38,7         | 40,0                    | 35,1                      | 32,9                | 40,9                 | 42,4         |
| Número medio de créditos aprobados 2018-19                                                 | <b>Total</b> | <b>39,5</b>  | <b>40,8</b>             | <b>35,6</b>               | <b>34,3</b>         | <b>42,0</b>          | <b>43,4</b>  |
|                                                                                            | Becarios     | 51,4         | 52,4                    | 48,1                      | 52,0                | 50,9                 | 54,1         |
|                                                                                            | No becarios  | 37,9         | 39,3                    | 33,8                      | 32,1                | 40,3                 | 41,5         |
| Tasa de rendimiento 2018-19 (%)                                                            | <b>Total</b> | <b>89,8%</b> | <b>91,5%</b>            | <b>85,2%</b>              | <b>84,6%</b>        | <b>92,2%</b>         | <b>89,8%</b> |
|                                                                                            | Becarios     | 94,9%        | 96,4%                   | 89,6%                     | 92,4%               | 97,0%                | 96,8%        |
|                                                                                            | No becarios  | 88,9%        | 90,7%                   | 84,3%                     | 83,2%               | 91,1%                | 88,3%        |
| Abandono del estudio en 1º año Cohorte de nuevo ingreso 2017-18 (%)                        | <b>Total</b> | <b>9,8%</b>  | <b>9,0%</b>             | <b>12,7%</b>              | <b>13,0%</b>        | <b>8,8%</b>          | <b>8,7%</b>  |
|                                                                                            | Becarios     | 4,6%         | 3,9%                    | 7,3%                      | 7,8%                | 3,4%                 | 2,6%         |
|                                                                                            | No becarios  | 10,8%        | 9,9%                    | 13,9%                     | 14,3%               | 10,0%                | 10,0%        |
| Cambio de estudio en 1º año Cohorte de nuevo ingreso 2017-18 (%)                           | <b>Total</b> | <b>1,2%</b>  | <b>0,9%</b>             | <b>1,8%</b>               | <b>2,3%</b>         | <b>1,2%</b>          | <b>1,2%</b>  |
|                                                                                            | Becarios     | 0,8%         | 0,5%                    | 1,5%                      | 1,6%                | 0,6%                 | 0,8%         |
|                                                                                            | No becarios  | 1,3%         | 1,0%                    | 1,8%                      | 2,4%                | 1,3%                 | 1,3%         |
| Duración media de estudios de Máster. Cohorte de egresados 2018-19 (años). Master de 1 año | <b>Total</b> | <b>1,35</b>  | <b>1,33</b>             | <b>1,52</b>               | <b>1,53</b>         | <b>1,28</b>          | <b>1,23</b>  |
|                                                                                            | Becarios     | 1,26         | 1,23                    | 1,46                      | 1,44                | 1,16                 | 1,15         |
|                                                                                            | No becarios  | 1,37         | 1,35                    | 1,53                      | 1,56                | 1,31                 | 1,25         |
| Nota media del expediente cohorte de egresados 2018-19                                     | <b>Total</b> | <b>8,16</b>  | <b>8,15</b>             | <b>7,90</b>               | <b>8,39</b>         | <b>8,35</b>          | <b>8,32</b>  |
|                                                                                            | Becarios     | 8,35         | 8,34                    | 7,95                      | 8,57                | 8,53                 | 8,56         |
|                                                                                            | No becarios  | 8,11         | 8,10                    | 7,88                      | 8,32                | 8,29                 | 8,25         |

**Tabla 9.3.8** Comparativa de las tasas de rendimiento, éxito y evaluación en Máster de los estudiantes becarios y no becarios de becas generales de la AGE y País Vasco. Curso 2019-2020.

|                               | Becarios     |              |              | No becarios  |              |              |
|-------------------------------|--------------|--------------|--------------|--------------|--------------|--------------|
|                               | Rendimiento  | Éxito        | Evaluación   | Rendimiento  | Éxito        | Evaluación   |
| <b>Total</b>                  | <b>95,8%</b> | <b>99,4%</b> | <b>96,4%</b> | <b>90,1%</b> | <b>98,5%</b> | <b>91,5%</b> |
| <b>Tipo de universidad</b>    |              |              |              |              |              |              |
| <b>Universidades públicas</b> | <b>95,3%</b> | <b>99,4%</b> | <b>96,0%</b> | <b>88,9%</b> | <b>98,5%</b> | <b>90,3%</b> |
| Presencial                    | 95,7%        | 99,4%        | 96,3%        | 89,6%        | 98,5%        | 91,0%        |
| No presencial                 | 85,5%        | 99,0%        | 86,3%        | 75,5%        | 98,4%        | 76,8%        |
| <b>Universidades privadas</b> | <b>97,7%</b> | <b>99,4%</b> | <b>98,3%</b> | <b>91,5%</b> | <b>98,4%</b> | <b>93,0%</b> |
| Presencial                    | 97,4%        | 99,4%        | 98,0%        | 92,0%        | 98,9%        | 93,0%        |
| No presencial                 | 98,0%        | 99,4%        | 98,6%        | 91,0%        | 97,9%        | 93,0%        |

### 9.3 Comparativa de indicadores entre becarios y no becarios. Máster

**Gráfico 9.3.9** Evolución de la tasa de abandono y cambio de estudio el 1º año en las cohortes de nuevo ingreso de becarios y no becarios en estudios de Máster.

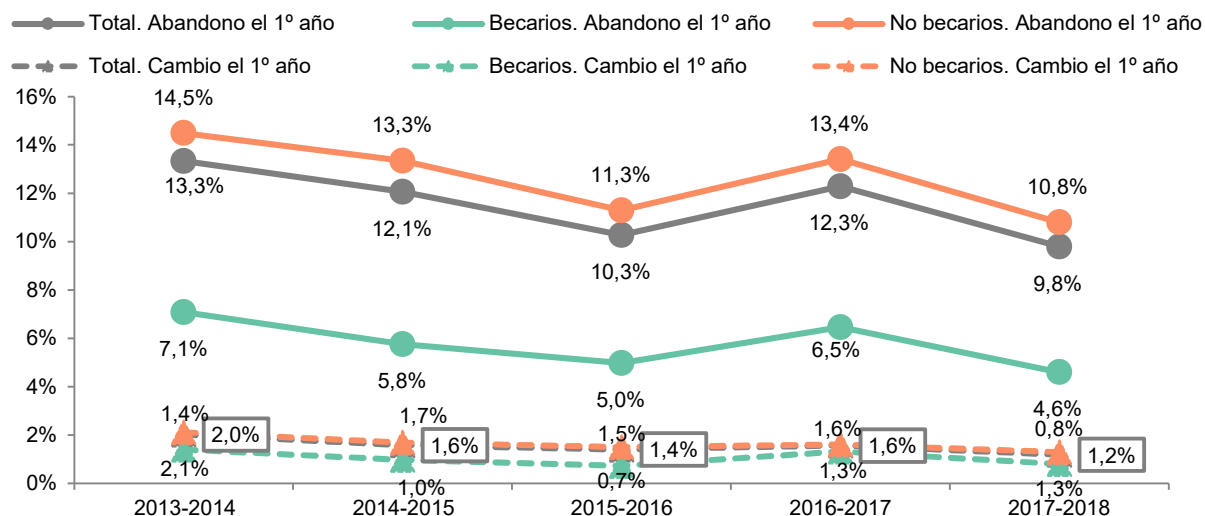

**Gráfico 9.3.10** Evolución de la tasa de rendimiento de los alumnos matriculados por condición de becarios y no becarios en estudios de Máster.

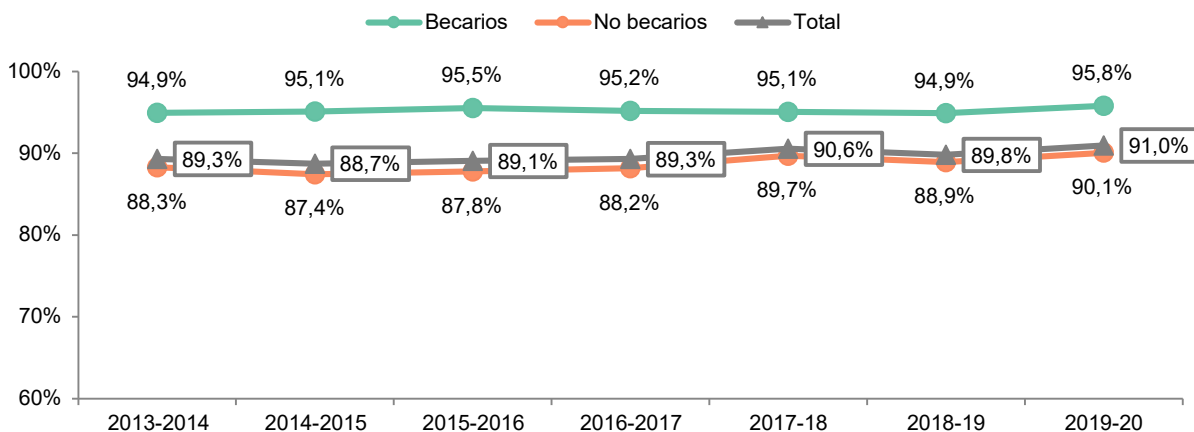

**Gráfico 9.3.11** Evolución de la nota media del expediente de los graduados becarios y no becarios en estudios de Máster.

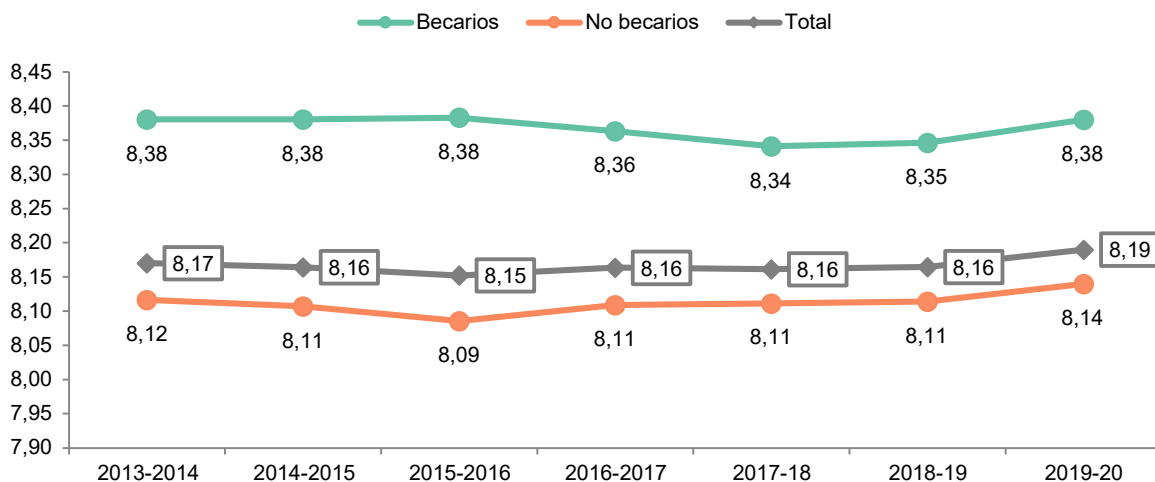

## 9.4 Becas y ayudas al estudio de las comunidades autónomas y las universidades.

**Tabla 9.4.1** Beneficiarios e importes de las becas universitarias que convocan las comunidades autónomas y las universidades según tipo de convocatoria y agente convocante <sup>(1)</sup>.

|                                          | Curso 2019-2020                        |                       | Curso 2018-2019                        |                       |
|------------------------------------------|----------------------------------------|-----------------------|----------------------------------------|-----------------------|
|                                          | Número de beneficiarios <sup>(2)</sup> | Importe concedido (€) | Número de beneficiarios <sup>(2)</sup> | Importe concedido (€) |
| <b>Total</b>                             | <b>160.183</b>                         | <b>256.236.286,81</b> | <b>163.870</b>                         | <b>257.534.893,88</b> |
| <b>Agente convocante</b>                 |                                        |                       |                                        |                       |
| <b>Comunidad autónoma</b>                | <b>82.455</b>                          | <b>127.416.365,74</b> | <b>85.542</b>                          | <b>128.838.875,90</b> |
| Becas de carácter general <sup>(3)</sup> | 69.769                                 | 64.873.777,95         | 72.063                                 | 66.818.551,59         |
| Complementaria de beca Erasmus           | 3.808                                  | 4.017.739,31          | 3.937                                  | 4.595.993,71          |
| Colaboración                             | 144                                    | 296.500,00            | 143                                    | 318.000,00            |
| Excelencia, premios y concursos          | 3.342                                  | 6.877.200,00          | 3.380                                  | 6.973.000,00          |
| Investigación predoctoral                | 2.571                                  | 48.040.190,16         | 2.654                                  | 46.251.695,03         |
| Convenios con otros organismos           | 2.382                                  | 2.292.200,00          | 2.701                                  | 2.598.775,00          |
| Otras <sup>(4)</sup>                     | 439                                    | 1.018.758,32          | 664                                    | 1.282.860,57          |
| <b>Universidades públicas</b>            | <b>61.590</b>                          | <b>85.579.814,69</b>  | <b>63.051</b>                          | <b>89.965.664,74</b>  |
| Becas de carácter general <sup>(3)</sup> | 33.302                                 | 26.574.650,89         | 31.298                                 | 26.258.670,41         |
| Complementaria de beca Erasmus           | 12.672                                 | 18.383.911,02         | 11.660                                 | 16.513.250,31         |
| Colaboración                             | 4.045                                  | 6.072.928,97          | 4.907                                  | 8.144.996,09          |
| Prácticas externas                       | 3.033                                  | 3.339.338,53          | 3.552                                  | 4.416.102,95          |
| Excelencia, premios y concursos          | 1.066                                  | 1.153.281,05          | 1.038                                  | 1.096.449,70          |
| Investigación predoctoral                | 1.884                                  | 24.293.983,49         | 2.319                                  | 26.407.352,26         |
| Convenios con otros organismos           | 2.347                                  | 4.657.436,52          | 4.070                                  | 5.638.466,71          |
| Otras <sup>(4)</sup>                     | 3.241                                  | 1.104.284,22          | 4.207                                  | 1.490.376,31          |
| <b>Universidades privadas</b>            | <b>16.138</b>                          | <b>43.240.106,38</b>  | <b>15.277</b>                          | <b>38.730.353,24</b>  |
| Becas de carácter general <sup>(3)</sup> | 10.929                                 | 24.872.469,63         | 10.343                                 | 21.945.021,30         |
| Complementaria de beca Erasmus           | 217                                    | 55.971,00             | 21                                     | 15.594,09             |
| Colaboración                             | 892                                    | 2.522.268,18          | 887                                    | 2.468.401,55          |
| Prácticas externas                       | 62                                     | 128.644,00            | 259                                    | 373.587,95            |
| Excelencia, premios y concursos          | 2.245                                  | 9.225.403,41          | 2.066                                  | 7.865.854,69          |
| Investigación predoctoral                | 399                                    | 2.519.517,05          | 339                                    | 2.127.435,88          |
| Convenios con otros organismos           | 748                                    | 1.896.264,97          | 742                                    | 1.900.319,54          |
| Otras <sup>(4)</sup>                     | 646                                    | 2.019.568,14          | 620                                    | 2.034.138,24          |

(1) No han facilitado información de becas y ayudas la Universidad Nacional de Educación a Distancia y Universidad de Navarra para ambos cursos

(2) Número de beneficiarios por convocatoria. Un estudiante puede ser beneficiario de varias convocatorias en el mismo curso académico

(3) Incluye las becas complementarias a las becas generales AGE

(4) En Otras becas se incluyen aquellas destinadas a estudios concretos, préstamos, idiomas y deportes

# 10 Personal en el Sistema Universitario Español

## PERSONAL DOCENTE E INVESTIGADOR (PDI)

El personal docente e investigador, en el curso 2019-2020, se situó en 127.383 personas, un 1,5% más que en el curso anterior. De ellas, 107.357 pertenecían a universidades públicas y 20.026 a universidades privadas. El profesorado en equivalente a tiempo completo alcanzó los 85.665,4 profesores, un 1,7% más que en el curso anterior.

Las mujeres representaron un 42,9% del total de docentes, en el funcionariado esta cifra se situó en el 36,8%. En cuanto a la edad, la media del personal docente fue de 49,3 años, ascendiendo a 55,4 en el caso del personal funcionario y a 58,9 en el caso de los Catedráticos de Universidad.

El 81,3% del cuerpo docente universitario disponía de al menos un sexenio y el 48,3% contó con los sexenios óptimos desde su lectura de tesis. Prácticamente la totalidad del cuerpo de catedráticos tenía al menos un sexenio (un 98,9%), de ellos el 70,4% disponía de los sexenios óptimos.

**El personal docente e investigador, en el curso 2019-2020, se situó en 127.383 personas, un 1,5% más que en el curso anterior.**

## PERSONAL DE ADMINISTRACIÓN Y SERVICIOS (PAS)

El personal de administración y servicios en el curso 2019-2020, se situó en 64.848 personas, un 2,5% más que en el curso anterior. De ellas, 54.514 pertenecían a universidades públicas y 10.334 a universidades privadas. En equivalencia a tiempo completo, el PAS ascendió a 63.339,5 efectivos. En centros propios de universidades públicas hubo 52.186 efectivos, de ellos el 64,8% eran funcionarios.

El 61,2% del PAS eran mujeres. En centros propios de universidades públicas las mujeres representaron el 67,8% del funcionariado y el 44,9% del personal contratado. Por edad, la media del personal de administración y servicios era de 48,9 años. Esta cifra se situó en 50,3 años en las universidades públicas.

## PERSONAL CONTRATADO DE INVESTIGACIÓN (PI)

El conjunto del personal empleado investigador y del personal técnico de apoyo a la investigación en el curso 2019-2020, alcanzó los 26.468 efectivos. De ellos, 24.765 estaban adscritos a universidades públicas y 1.703 a universidades privadas.

El personal empleado investigador se situó en 19.574 investigadores contratados, de los cuales, el 66,1% procedía de convocatorias públicas competitivas. En lo que se refiere a la edad, el 73,6% del personal empleado investigador tenía una edad inferior a los 35 años. Por sexo, el 46,5% eran mujeres.

### Notas

- (1) **En ETC:** En equivalente a tiempo completo.
- (2) Las tablas que incluyen la rama de conocimiento del profesor, se elaboraron eliminando de la población aquellos casos en los que se desconoce la misma. La respuesta obtenida fue del 97,6%. Si restringimos al funcionariado, la población utilizada correspondía al 99,99% del total.
- (3) El personal contratado de investigación se recogió únicamente en los centros propios de las universidades.
- (4) Las universidades **Abat Oliba CEU e Internacional de Cataluña** no facilitaron información del personal de investigación en el curso 2019-2020.

### Referencias

[ANEXO I: Definiciones](#)

[Estadística de Personal de las Universidades](#)

[Sistema Integrado de Información Universitaria](#)

## 10.1 Personal en el SUE. Cifras clave

Mapa 10.1.1 Dispersión geográfica del personal universitario. Curso 2019-2020

|                                                    |         |
|----------------------------------------------------|---------|
| Total Personal Universitario                       | 218.699 |
| Total Personal Docente e Investigador (PDI)        | 127.383 |
| Total Personal de Administración y Servicios (PAS) | 64.848  |
| Total Personal contratado de Investigación (PI)    | 26.468  |

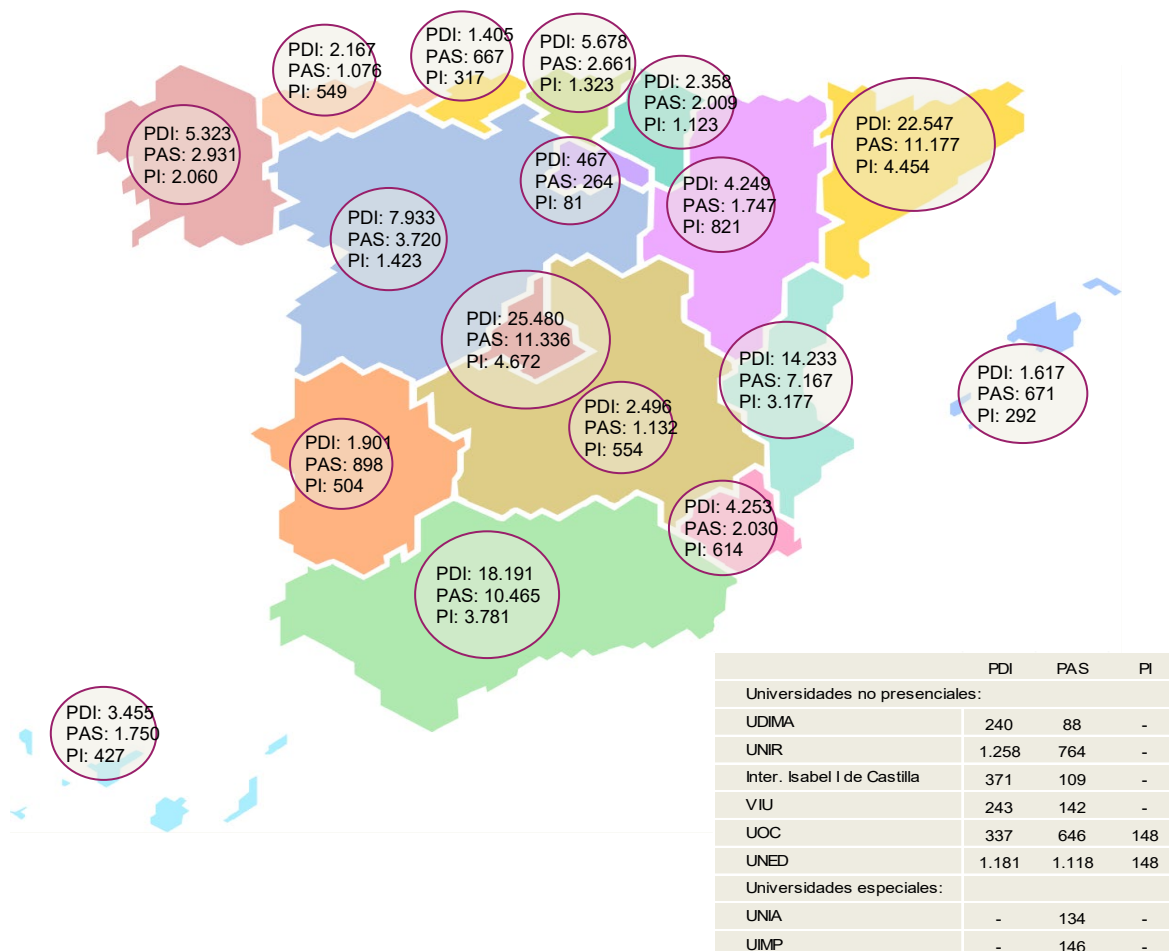

Gráfico 10.1.2 Evolución del personal universitario

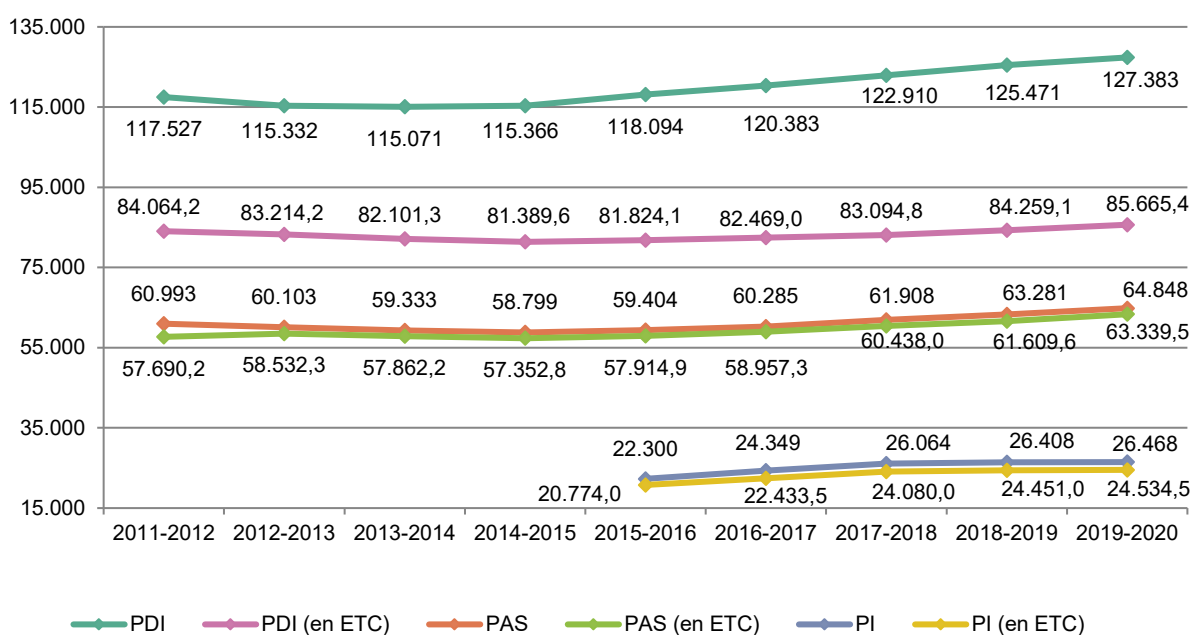

## 10.1 Personal en el SUE. Cifras clave

Tabla 10.1.3 Personal universitario. Curso 2019-2020

|                                                     | Total          |               | Univ. públicas |               | Univ. privadas |               |
|-----------------------------------------------------|----------------|---------------|----------------|---------------|----------------|---------------|
|                                                     | Total          | Distrib. (%)  | Total          | Distrib. (%)  | Total          | Distrib. (%)  |
| <b>Personal universitario</b>                       | <b>218.699</b> | <b>100,0%</b> | <b>186.636</b> | <b>100,0%</b> | <b>32.063</b>  | <b>100,0%</b> |
| <b>Personal docente e investigador (PDI)</b>        | <b>127.383</b> | <b>58,2%</b>  | <b>107.357</b> | <b>57,5%</b>  | <b>20.026</b>  | <b>62,5%</b>  |
| <b>Centros Propios</b>                              | <b>120.245</b> | <b>55,0%</b>  | <b>101.305</b> | <b>54,3%</b>  | <b>18.940</b>  | <b>59,1%</b>  |
| Funcionarios                                        | 42.341         | 19,4%         | 42.341         | 22,7%         | -              | -             |
| Contratados                                         | 77.144         | 35,3%         | 58.204         | 31,2%         | 18.940         | 59,1%         |
| Eméritos                                            | 760            | 0,3%          | 760            | 0,4%          | -              | -             |
| <b>Centros Adscritos</b>                            | <b>7.138</b>   | <b>3,3%</b>   | <b>6.052</b>   | <b>3,2%</b>   | <b>1.086</b>   | <b>3,4%</b>   |
| <b>Personal de administración y servicios (PAS)</b> | <b>64.848</b>  | <b>29,7%</b>  | <b>54.514</b>  | <b>29,2%</b>  | <b>10.334</b>  | <b>32,2%</b>  |
| <b>Centros Propios</b>                              | <b>62.102</b>  | <b>28,4%</b>  | <b>52.186</b>  | <b>28,0%</b>  | <b>9.916</b>   | <b>30,9%</b>  |
| Funcionarios                                        | 33.822         | 15,5%         | 33.822         | 18,1%         | -              | -             |
| Contratados                                         | 27.850         | 12,7%         | 17.934         | 9,6%          | 9.916          | 30,9%         |
| Eventuales                                          | 430            | 0,2%          | 430            | 0,2%          | -              | -             |
| <b>Centros Adscritos</b>                            | <b>2.746</b>   | <b>1,3%</b>   | <b>2.328</b>   | <b>1,2%</b>   | <b>418</b>     | <b>1,3%</b>   |
| <b>Personal contratado de investigación (PI)</b>    | <b>26.468</b>  | <b>12,1%</b>  | <b>24.765</b>  | <b>13,3%</b>  | <b>1.703</b>   | <b>5,3%</b>   |
| Personal empleado investigador                      | 19.574         | 9,0%          | 18.266         | 9,8%          | 1.308          | 4,1%          |
| Personal técnico de apoyo a la investigación        | 6.894          | 3,2%          | 6.499          | 3,5%          | 395            | 1,2%          |

Tabla 10.1.4 Indicadores universitarios de personal. Curso 2019-2020

|                                                                                     | Total | Univ. públicas | Univ. privadas |
|-------------------------------------------------------------------------------------|-------|----------------|----------------|
| Porcentaje del PDI permanente                                                       | 53,9% | 52,4%          | 62,0%          |
| Porcentaje del PAS permanente                                                       | 73,1% | 70,5%          | 86,4%          |
| Porcentaje del PDI doctor                                                           | 73,1% | 70,5%          | 86,4%          |
| Edad media del PDI                                                                  | 49,3  | 50,1           | 45,3           |
| Edad media del PAS                                                                  | 48,9  | 50,3           | 41,8           |
| Edad media del personal empleado investigador                                       | 31,2  | 31,1           | 33,6           |
| Edad media del personal técnico de apoyo a la investigación                         | 32,7  | 32,5           | 36,1           |
| Porcentaje del PDI que trabaja en la universidad en la que ha leído la tesis        | 68,4% | 73,3%          | 31,5%          |
| Porcentaje del PDI que trabaja en la comunidad autónoma en la que ha leído la tesis | 86,0% | 87,4%          | 75,2%          |
| Porcentaje del cuerpo docente universitario con al menos un sexenio                 | 81,3% | 81,3%          | -              |
| Porcentaje del cuerpo docente universitario con sexenios óptimos                    | 48,3% | 48,3%          | -              |
| Número de estudiantes por PDI (en ETC)                                              | 13,8  | 13,2           | 18,1           |
| Número de estudiantes por PAS (en ETC)                                              | 19,0  | 18,5           | 22,1           |
| Número de PDI por PAS (en ETC)                                                      | 1,4   | 1,4            | 1,2            |

## 10.2 Personal en el SUE. Personal docente e investigador

Gráfico 10.2.1 Evolución del personal docente e investigador

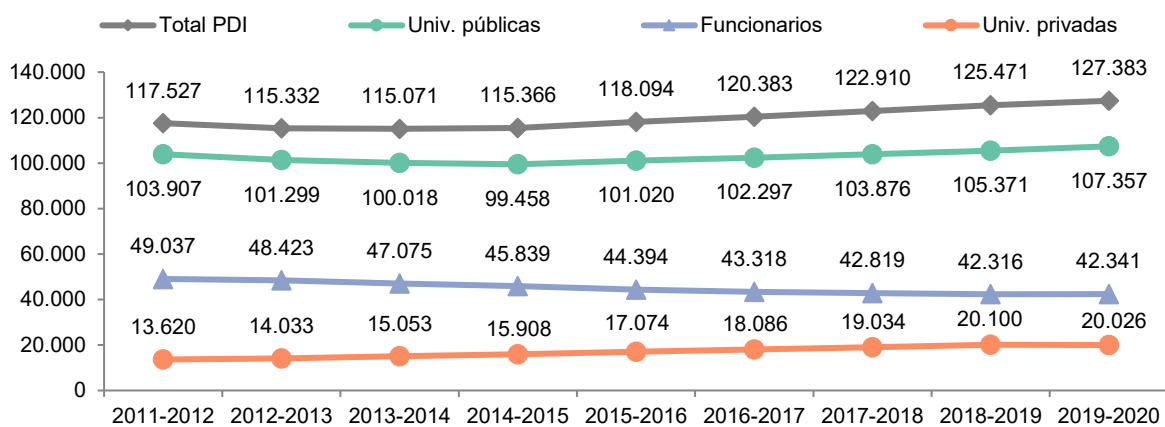

Tabla 10.2.2 Personal docente e investigador. Curso 2019-2020

|                                             | PDI Total      | % Mujeres   | PDI (en ETC)    | Tasa de variación anual |                                  |
|---------------------------------------------|----------------|-------------|-----------------|-------------------------|----------------------------------|
| <b>Total SUE</b>                            | <b>127.383</b> | <b>42,9</b> | <b>85.665,4</b> | <b>1,5</b>              |                                  |
| <b>Univ. públicas</b>                       | <b>107.357</b> | <b>42,3</b> | <b>74.444,2</b> | <b>1,9</b>              |                                  |
| <b>Univ.públicas. Centros propios</b>       | <b>101.305</b> | <b>42,1</b> | <b>71.592,5</b> | <b>1,9</b>              |                                  |
| <b>Funcionarios</b>                         | <b>42.341</b>  | <b>36,8</b> | <b>41.870,6</b> | <b>0,1</b>              | Distribución de los funcionarios |
| Catedráticos de Universidad (CU)            | 11.791         | 24,9        | 11.643,9        | 3,8                     | 27,8%                            |
| Titulares de Universidad (TU)               | 26.964         | 41,8        | 26.694,1        | 0,0                     | 63,7%                            |
| Catedráticos de Escuela Universitaria (CEU) | 647            | 32,8        | 642,2           | -5,7                    | 1,5%                             |
| Titulares de Escuela Universitaria (TEU)    | 2.856          | 39,8        | 2.807,3         | -11,5                   | 6,7%                             |
| Otro personal funcionario                   | 83             | 41,0        | 83,0            | -8,8                    | 0,2%                             |
| <b>Contratados</b>                          | <b>58.204</b>  | <b>46,3</b> | <b>29.374,3</b> | <b>3,2</b>              | Distribución de los contratados  |
| Ayudante                                    | 504            | 46,4        | 504,0           | 0,4                     | 0,9%                             |
| Ayudante Doctor                             | 5.378          | 51,1        | 5.378,0         | 18,5                    | 9,2%                             |
| Contratado Doctor                           | 10.682         | 49,8        | 10.564,9        | -2,1                    | 18,4%                            |
| Asociado                                    | 25.498         | 41,4        | 5.892,8         | 1,7                     | 43,8%                            |
| Asociado C.C.Salud                          | 9.356          | 49,6        | 1.400,7         | 5,4                     | 16,1%                            |
| Colaborador                                 | 1.625          | 45,4        | 1.611,5         | -6,5                    | 2,8%                             |
| Visitante                                   | 952            | 47,5        | 856,0           | -2,1                    | 1,6%                             |
| Otros                                       | 4.209          | 53,8        | 3.166,5         | 11,3                    | 7,2%                             |
| <b>Eméritos</b>                             | <b>760</b>     | <b>22,4</b> | <b>347,6</b>    | <b>5,4</b>              |                                  |
| <b>Univ.públicas. Centros adscritos</b>     | <b>6.052</b>   | <b>44,9</b> | <b>2.851,7</b>  | <b>2,0</b>              |                                  |
| <b>Univ. privadas</b>                       | <b>20.026</b>  | <b>46,1</b> | <b>11.221,2</b> | <b>-0,4</b>             |                                  |
| Univ. privadas. Centros propios             | 18.940         | 46,5        | 10.828,1        | -0,7                    |                                  |
| Univ. privadas. Centros adscritos           | 1.086          | 39,0        | 393,1           | 5,5                     |                                  |



## 10.3 Personal en el SUE. Perfil del personal docente investigador

**Gráfico 10.3.1** Distribución del PDI por sexo y grupo de edad. Curso 2019-2020

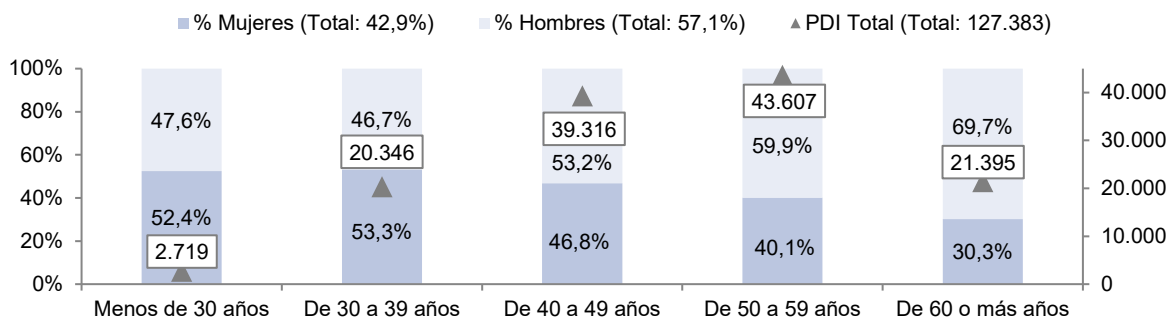

**Gráfico 10.3.2** Distribución del PDI por sexo y categoría. Curso 2019-2020

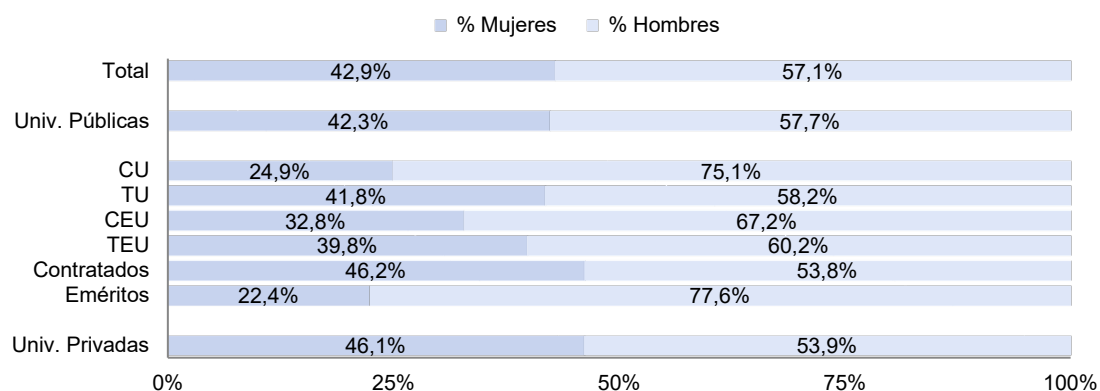

**Gráfico 10.3.3** Distribución del PDI por grupos de edad y categoría. Curso 2019-2020

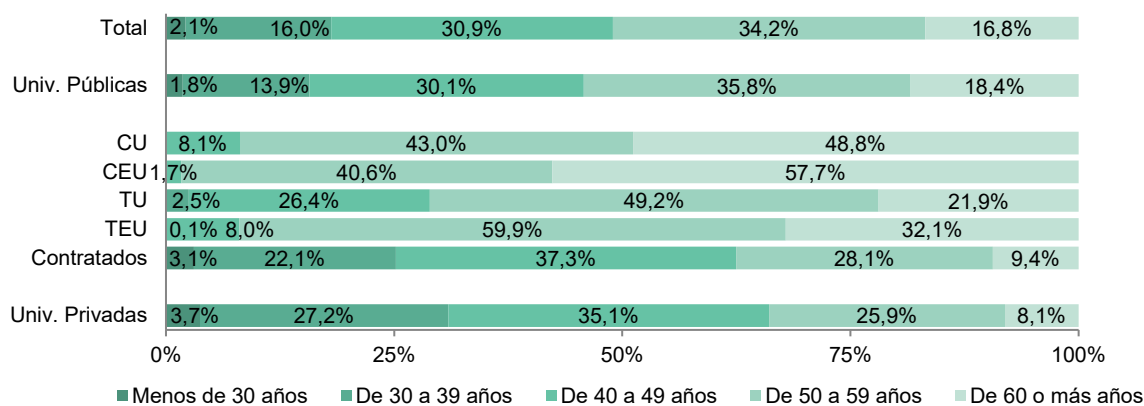

**Gráfico 10.3.4** Evolución de la edad media del PDI por categoría

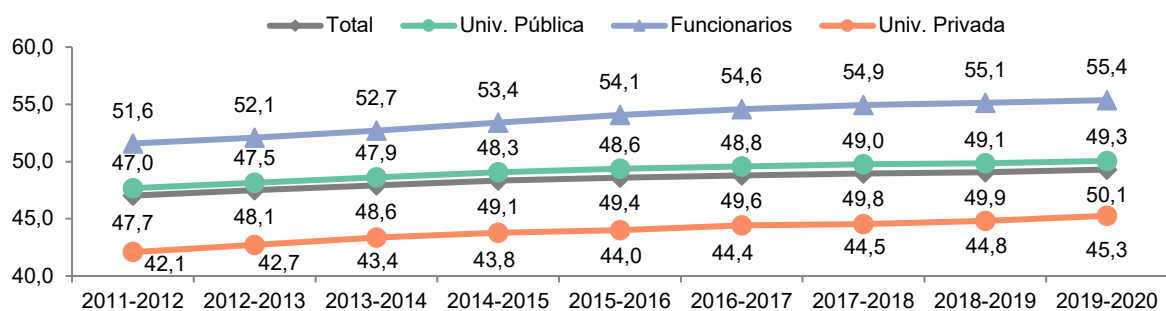

## 10.4 Personal en el SUE. PDI por rama de enseñanza

**Gráfico 10.4.1** Distribución del PDI en centros propios de universidades públicas por grupo de edad y rama de enseñanza. Curso 2019-2020

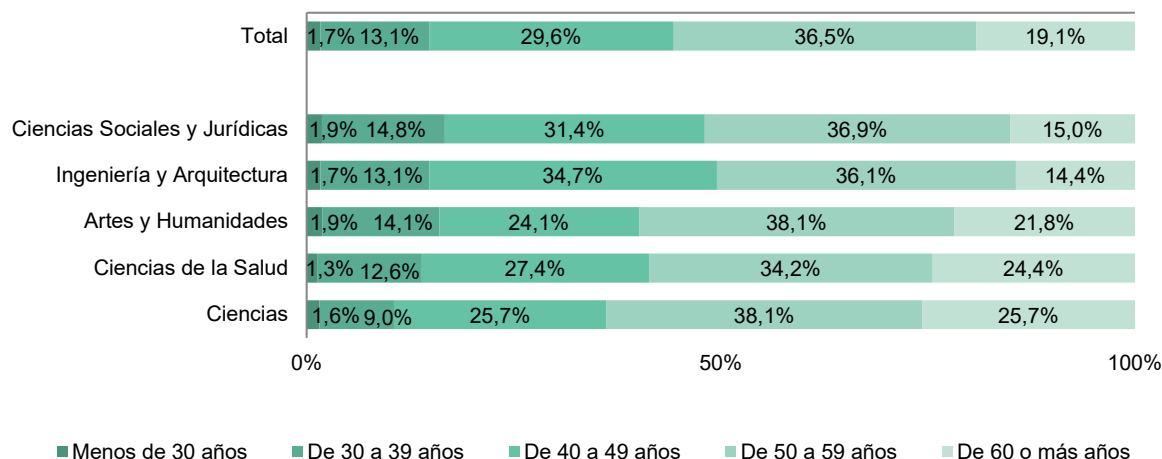

**Gráfico 10.4.2** Distribución del PDI en centros propios de universidades públicas por sexo y rama de enseñanza. Curso 2019-2020

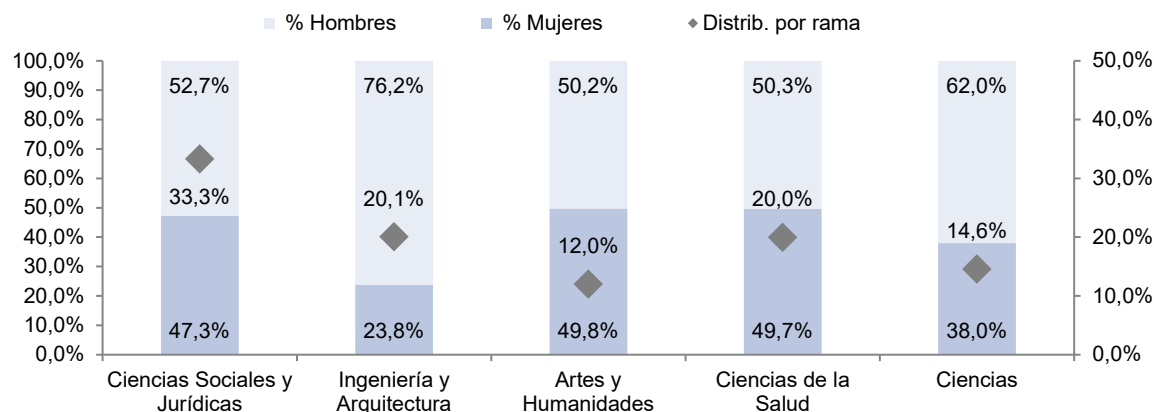

**Gráfico 10.4.3** Distribución del PDI en centros propios de universidades públicas por categoría y rama de enseñanza. Curso 2019-2020

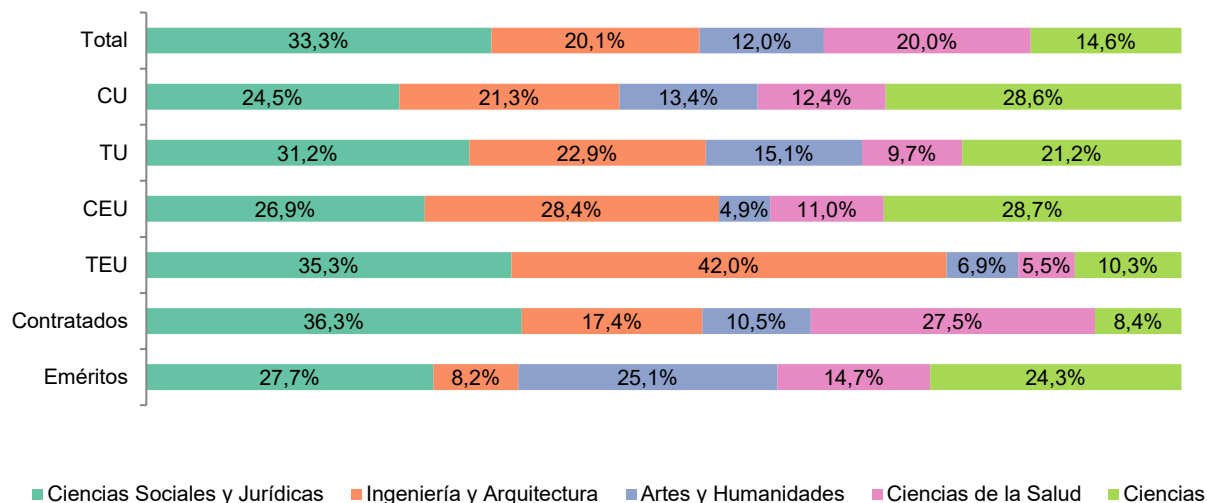

## 10.5 Personal en el SUE. PDI por ámbito de conocimiento

**Gráfico 10.5.1** Distribución del PDI en centros propios de universidades públicas por grupo de edad y ámbito de conocimiento. Curso 2019-2020

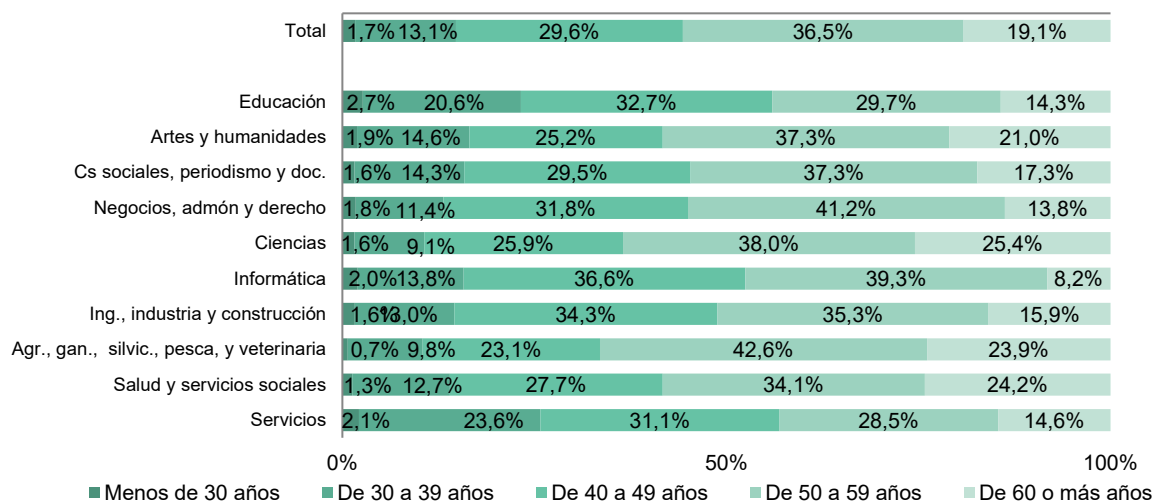

**Gráfico 10.5.2** Distribución del PDI en centros propios de universidades públicas por sexo y ámbito del conocimiento. Curso 2019-2020

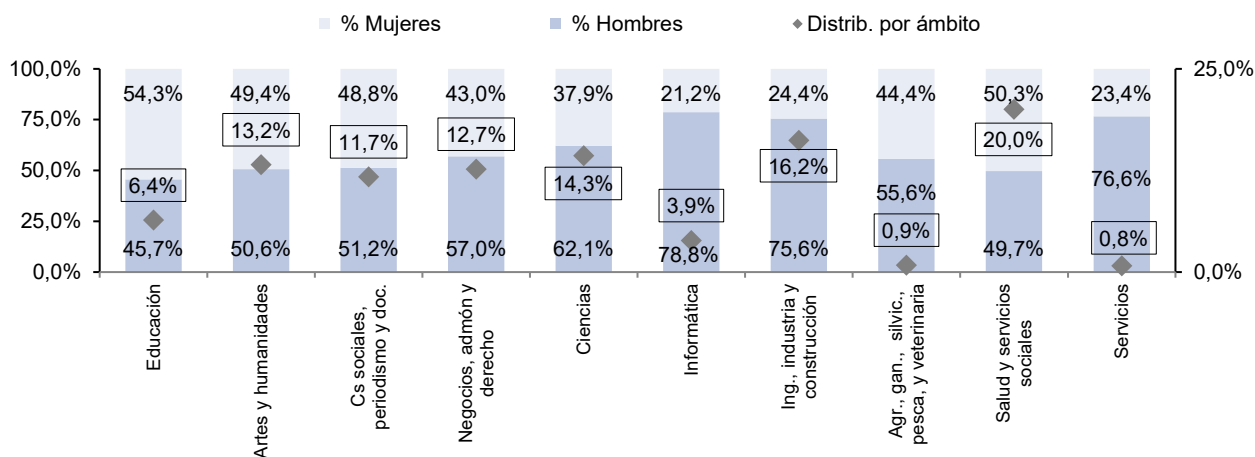

**Gráfico 10.5.3** PDI doctor en centros propios de universidades públicas por ámbito de conocimiento. Curso 2019-2020

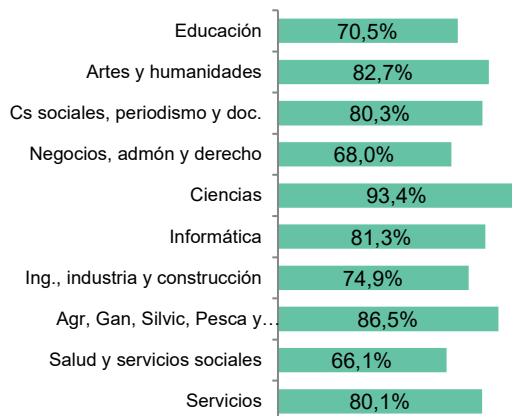

**Gráfico 10.5.4** Número medio de sexenios del cuerpo docente universitario por ámbito de conocimiento. Curso 2019-2020

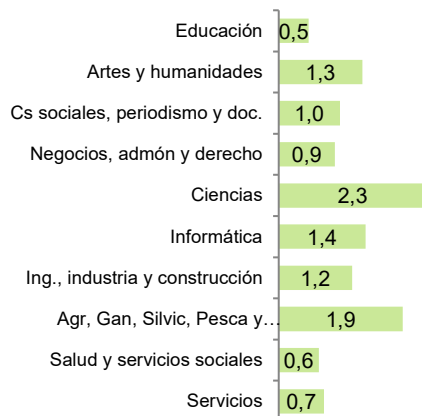

## 10.6 Personal en el SUE. PDI doctor

**Gráfico 10.6.1** PDI Doctor por tipo de universidad y por sexo. Curso 2019-2020

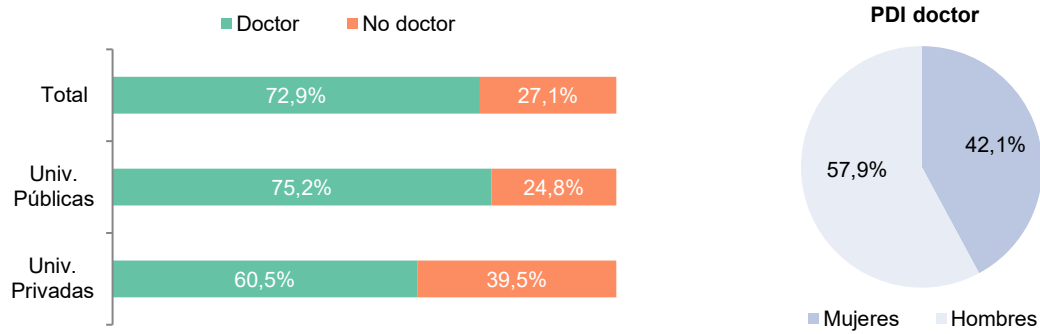

**Gráfico 10.6.2** Distribución del PDI Doctor por grupos de edad y sexo. Curso 2019-2020

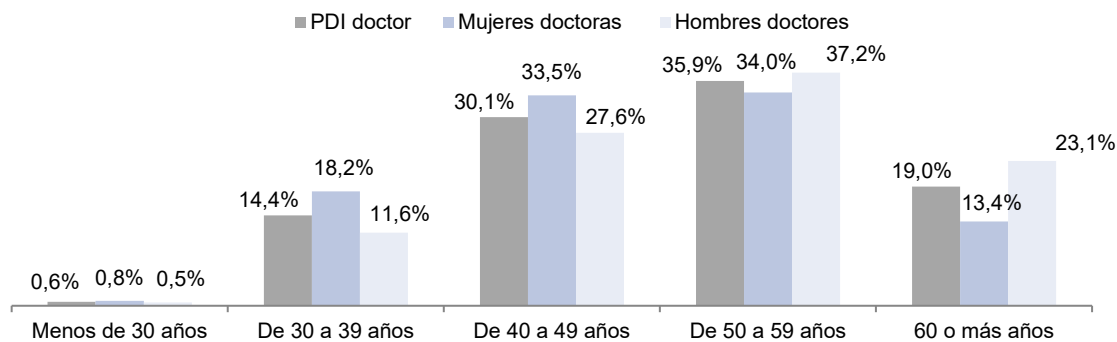

**Gráfico 10.6.3** Porcentaje del PDI Doctor en universidades públicas por tipo de personal. Curso 2019-2020

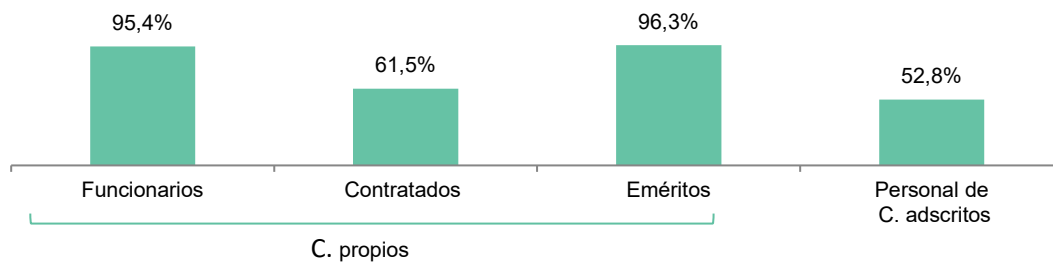

**Gráfico 10.6.4** Porcentaje del PDI Doctor en centros propios de las universidades públicas por rama de enseñanza y sexo. Curso 2019-2020

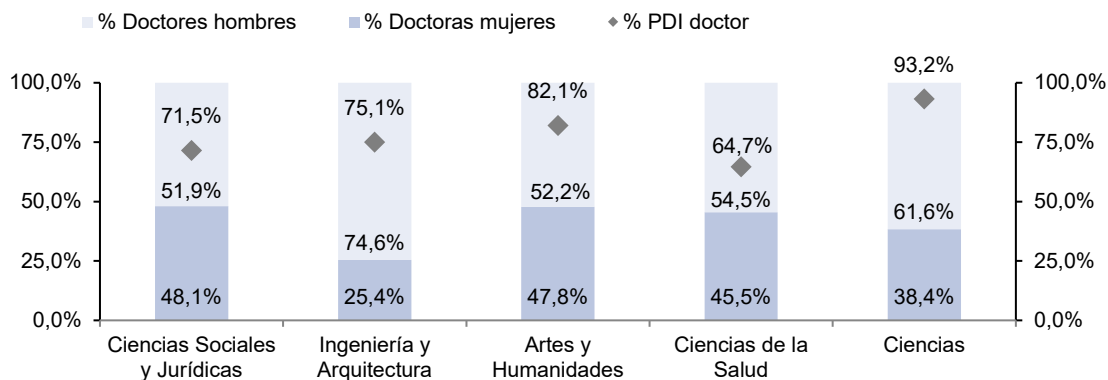

## 10.7 Personal en el SUE. Número de estudiantes por PDI

**Gráfico 10.7.1** Número de estudiantes por PDI y de estudiantes por PDI Doctor (en ETC) en universidades presenciales por tipo de universidad. Curso 2019-2020

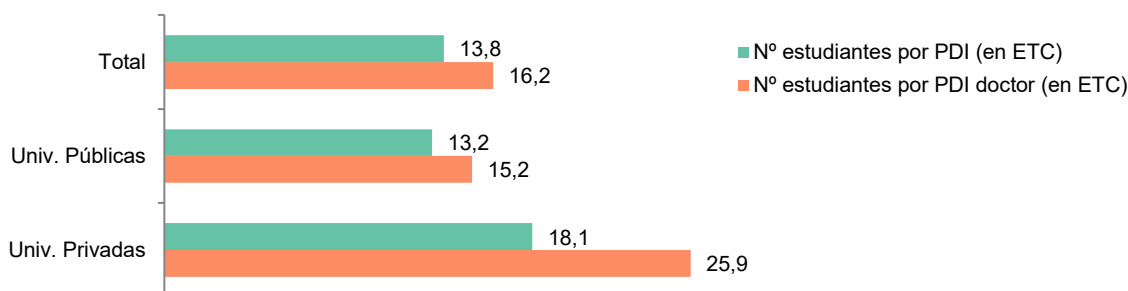

**Gráfico 10.7.2** Número de estudiantes por PDI (en ETC) en universidades presenciales por tipo de universidad y comunidad autónoma. Curso 2019-2020

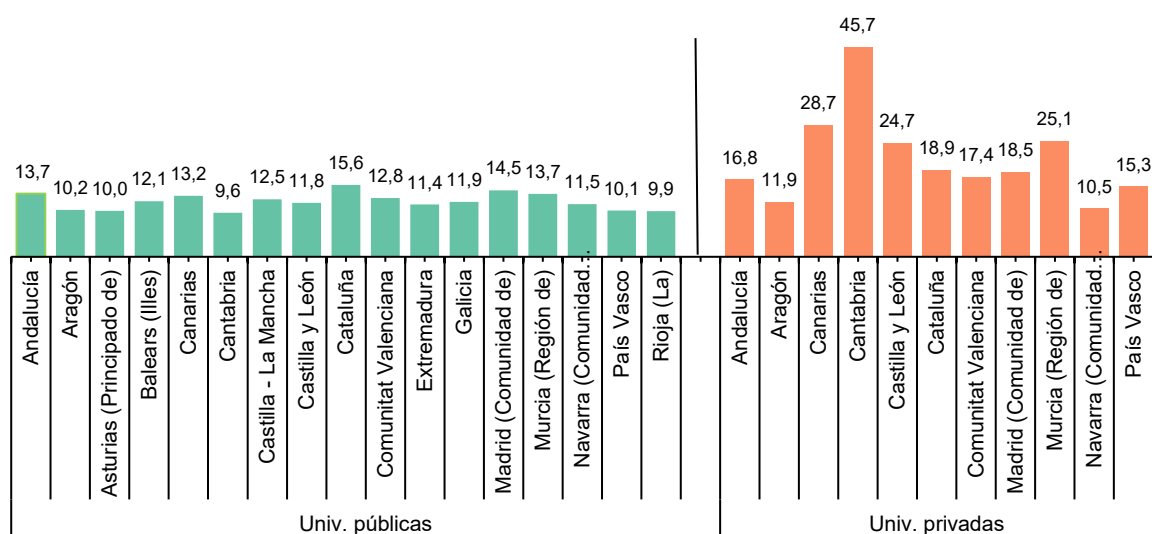

**Gráfico 10.7.3** Distribución del PDI y de los estudiantes en ETC en centros propios de universidades públicas presenciales por rama de enseñanza. Curso 2019-2020

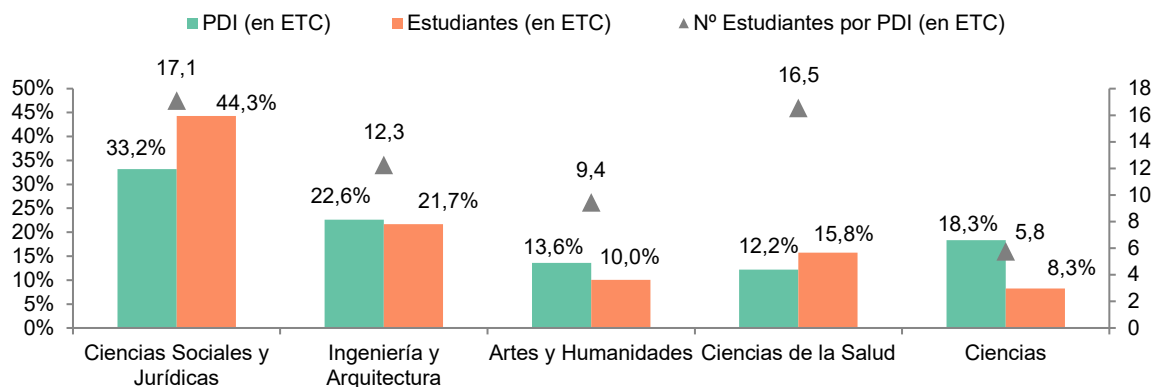

## 10.8 Personal en el SUE. PDI extranjero

**Gráfico 10.8.1** PDI extranjero por sexo. Curso 2019-2020

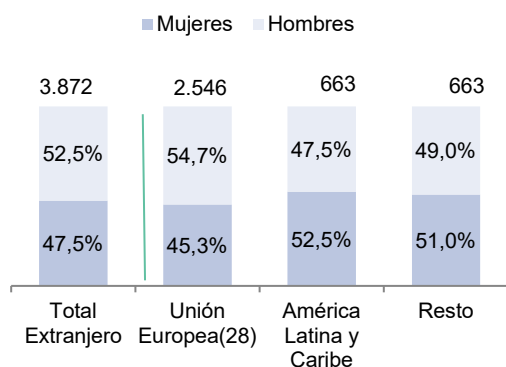

**Gráfico 10.8.3** PDI extranjero por grupo de edad. Curso 2019-2020

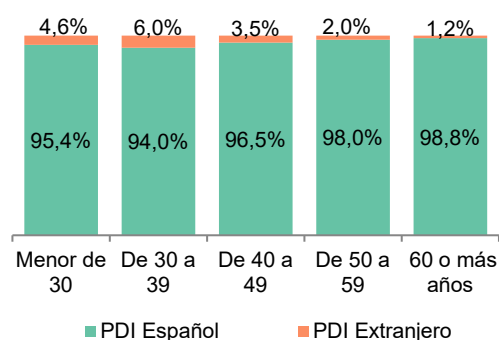

**Gráfico 10.8.5** PDI extranjero por tipo de universidad. Curso 2019-2020

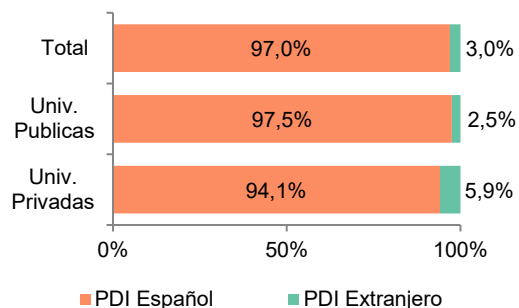

**Gráfico 10.8.7** PDI extranjero en centros propios de universidades públicas por rama de enseñanza. Curso 2019-2020

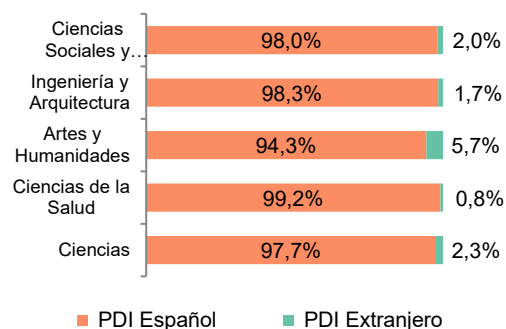

**Gráfico 10.8.2** Distribución del PDI extranjero por grupo de edad y sexo. Curso 2019-2020

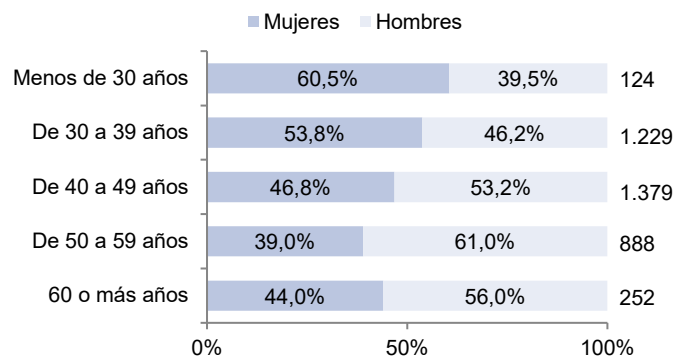

**Gráfico 10.8.4** Distribución del PDI extranjero por lugar de procedencia y grupo de edad. Curso 2019-2020

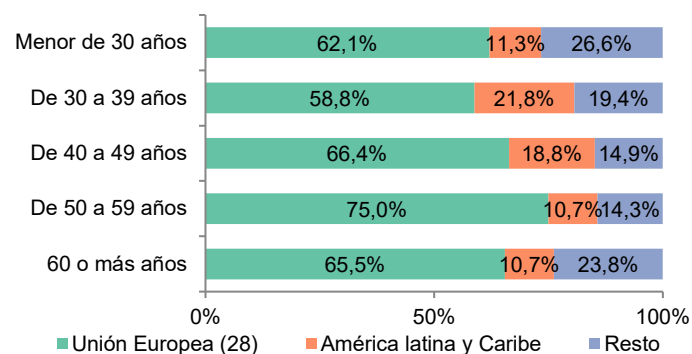

**Gráfico 10.8.6** Distribución del PDI extranjero por lugar de procedencia y tipo de universidad. Curso 2019-2020

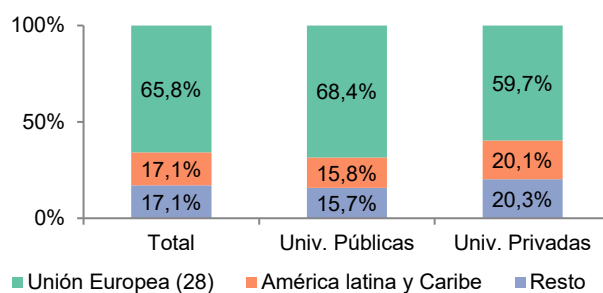

**Gráfico 10.8.8** Distribución del PDI extranjero en centros propios de universidades públicas por lugar de procedencia y rama de enseñanza. Curso 2019-2020

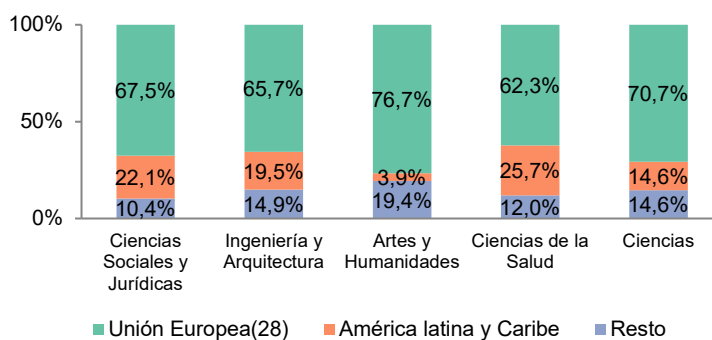

## 10.9 Personal en el SUE. Sexenios del PDI

**Gráfico 10.9.1** Porcentaje del cuerpo docente universitario (CDU) con al menos un sexenio, con sexenios óptimos y número medio de sexenios del cuerpo docente. Curso 2019-2020

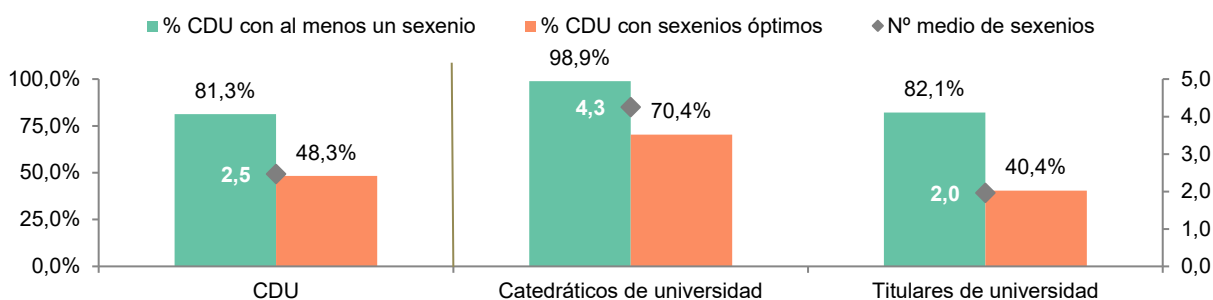

**Gráfico 10.9.2** Porcentaje del CDU con al menos un sexenio, con sexenios óptimos y número medio de sexenios del cuerpo docente por grupo de edad. Curso 2019-2020

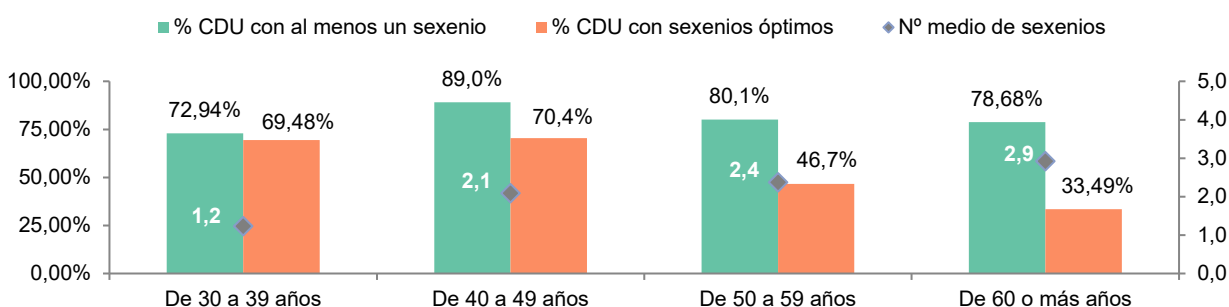

**Gráfico 10.9.3** Porcentaje del CDU con al menos un sexenio, con sexenios óptimos y número medio de sexenios del cuerpo docente por rama de enseñanza. Curso 2019-2020

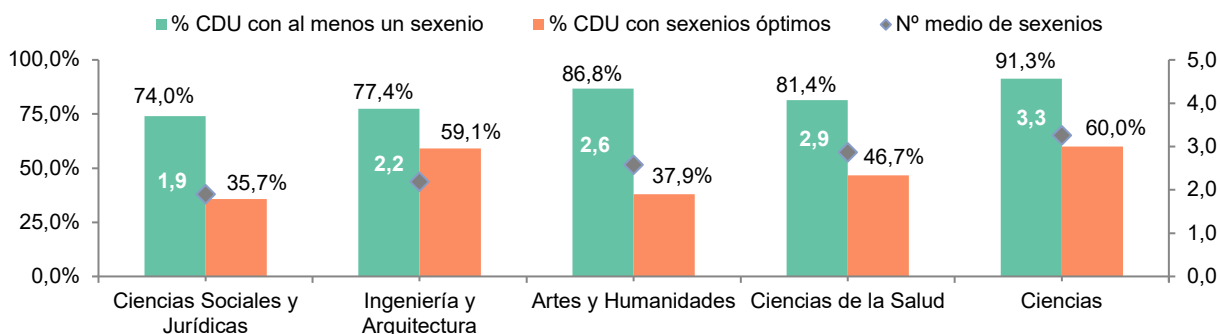

**Gráfico 10.9.4** Distribución del CDU por número de sexenios. Curso 2019-2020

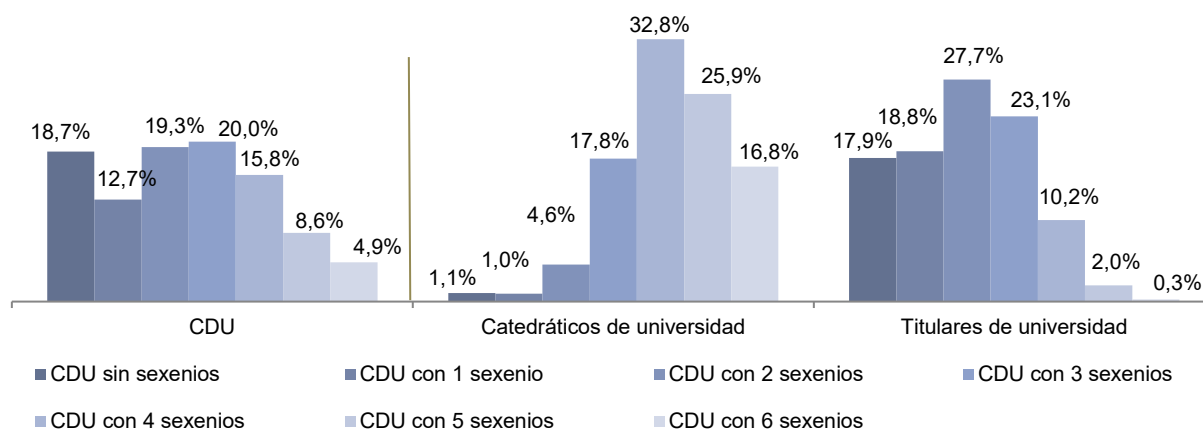

## 10.10 Personal en el SUE. Personal de administración y servicios

Gráfico 10.10.1 Evolución del personal de administración y servicios

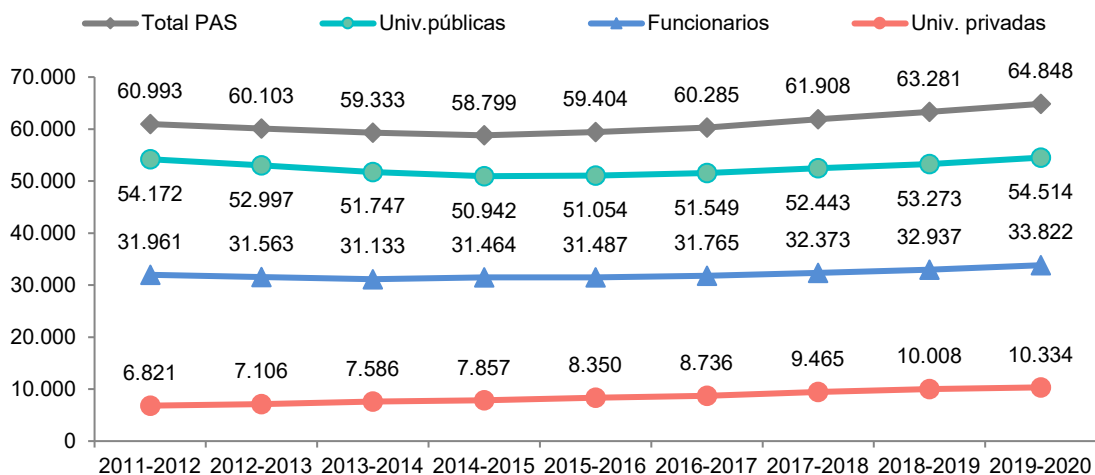

Tabla 10.10.2 Personal de administración y servicios. Curso 2019-2020

|                                                                    | PAS Total     | % Mujeres   | PAS ETC         | Tasa de variación |                                            |
|--------------------------------------------------------------------|---------------|-------------|-----------------|-------------------|--------------------------------------------|
| <b>Total SUE</b>                                                   | <b>64.848</b> | <b>61,2</b> | <b>63.339,5</b> | <b>2,5</b>        |                                            |
| <b>Univ. públicas</b>                                              | <b>54.514</b> | <b>60,0</b> | <b>53.643,2</b> | <b>2,3</b>        |                                            |
| <b>Univ. públicas. Centros propios</b>                             | <b>52.186</b> | <b>59,9</b> | <b>51.431,4</b> | <b>2,2</b>        |                                            |
| <b>Funcionarios</b>                                                | <b>33.822</b> | <b>67,8</b> | <b>33.762,9</b> | <b>2,7</b>        | <b>Distribución de los funcionario</b><br> |
| Grupo A                                                            | 8.978         | 59,2        | 8.963,2         | 2,9               |                                            |
| Subgrupo A1                                                        | 3.486         | 53,3        | 3.480,1         | 3,8               |                                            |
| Subgrupo A2                                                        | 5.492         | 62,9        | 5.483,2         | 2,4               |                                            |
| Grupo B                                                            | 7             | 42,9        | 7,0             | 133,3             |                                            |
| Grupo C                                                            | 24.292        | 71,3        | 24.251,4        | 2,9               |                                            |
| Subgrupo C1                                                        | 15.955        | 69,9        | 15.935,9        | -0,4              |                                            |
| Subgrupo C2                                                        | 8.337         | 74,1        | 8.315,5         | 9,9               |                                            |
| Otros funcionarios                                                 | 545           | 55,4        | 541,3           | -10,7             |                                            |
| <b>Contratados</b>                                                 | <b>17.934</b> | <b>44,9</b> | <b>17.256,1</b> | <b>1,2</b>        |                                            |
| <b>Tipo de contrato según titulación exigida:</b>                  |               |             |                 |                   |                                            |
| Grado, Licenciatura, Arqu., Ing. Superior o equiv.                 | 2.473         | 50,1        | 2.371,3         | 8,8               |                                            |
| Diplomatura, Ing. o Arqu. Técnica, FP3 o equiv.                    | 1.834         | 42,4        | 1.762,1         | 0,0               |                                            |
| Bachillerato, BUP, FP de Téc. Superior, Téc. Especialista o equiv. | 8.198         | 40,0        | 7.822,8         | 0,8               |                                            |
| Grad. Ed. Secund., EGB, FP Téc., Téc. Auxiliar o equiv.            | 3.491         | 53,3        | 3.413,3         | -5,3              |                                            |
| Sin requisito de titulación                                        | 1.938         | 46,0        | 1.886,6         | 8,5               |                                            |
| <b>Eventuales</b>                                                  | <b>430</b>    | <b>58,6</b> | <b>412,4</b>    | <b>9,4</b>        |                                            |
| <b>Univ. públicas. Centros adscritos</b>                           | <b>2.328</b>  | <b>62,7</b> | <b>2.211,8</b>  | <b>4,4</b>        |                                            |
| <b>Univ. privadas</b>                                              | <b>10.334</b> | <b>67,5</b> | <b>9.696,3</b>  | <b>3,3</b>        |                                            |
| Univ. privadas. Centros propios                                    | 9.916         | 67,4        | 9.316,0         | 4,2               |                                            |
| Univ. privadas. Centros adscritos                                  | 418           | 69,1        | 380,3           | -15,4             |                                            |



## 10.11 Personal en el SUE. Perfil del PAS

**Gráfico 10.11.1** Distribución del PAS por grupos de edad y categoría. Curso 2019-2020

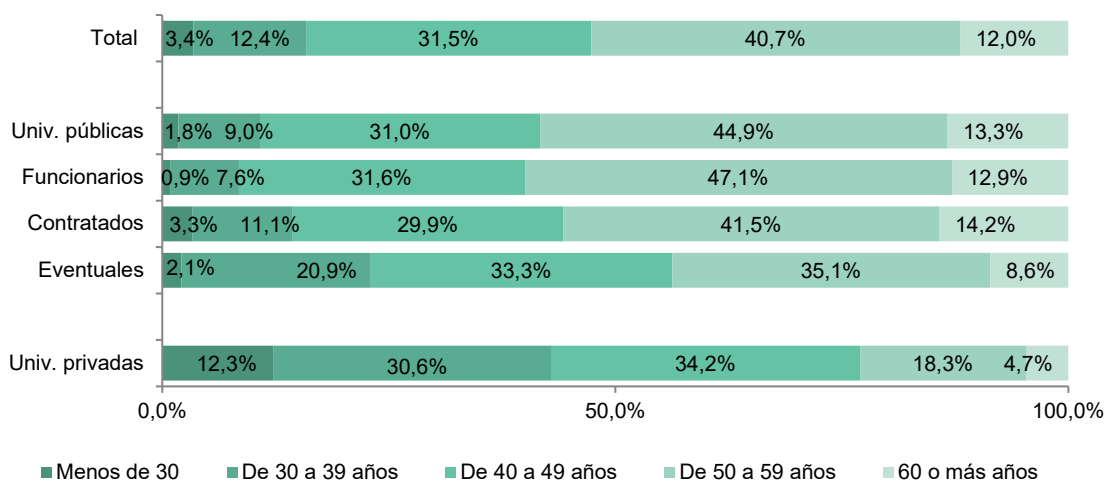

**Gráfico 10.11.2** Distribución del PAS por sexo y categoría. Curso 2019-2020

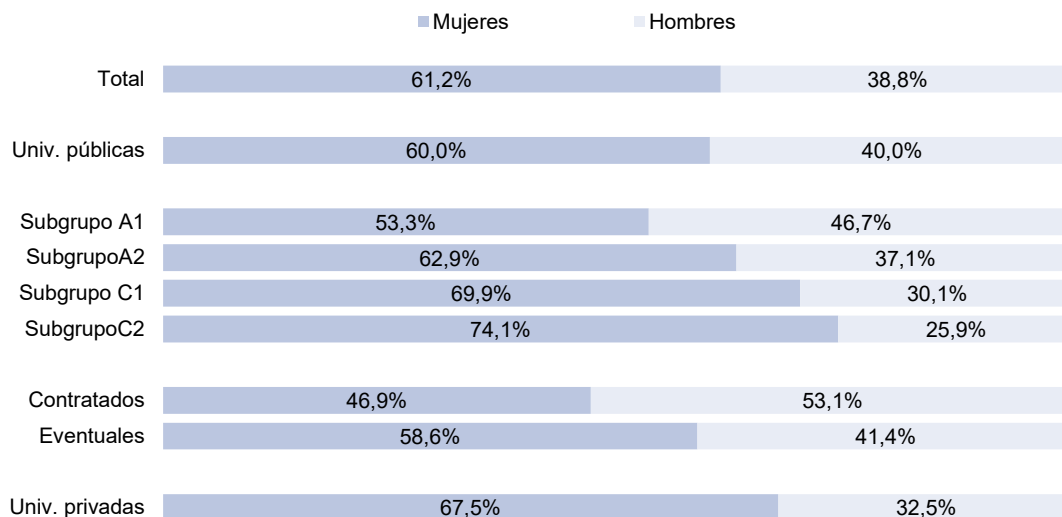

**Gráfico 10.11.3** Distribución del PAS por tipo de contrato y sexo. Curso 2019-2020

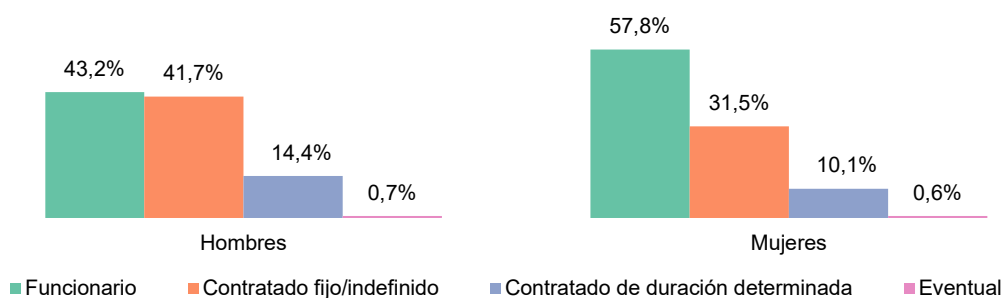

## 10.12 Personal en el SUE. PAS por servicio que presta

**Gráfico 10.12.1** Distribución del PAS por servicio y sexo. Curso 2019-2020

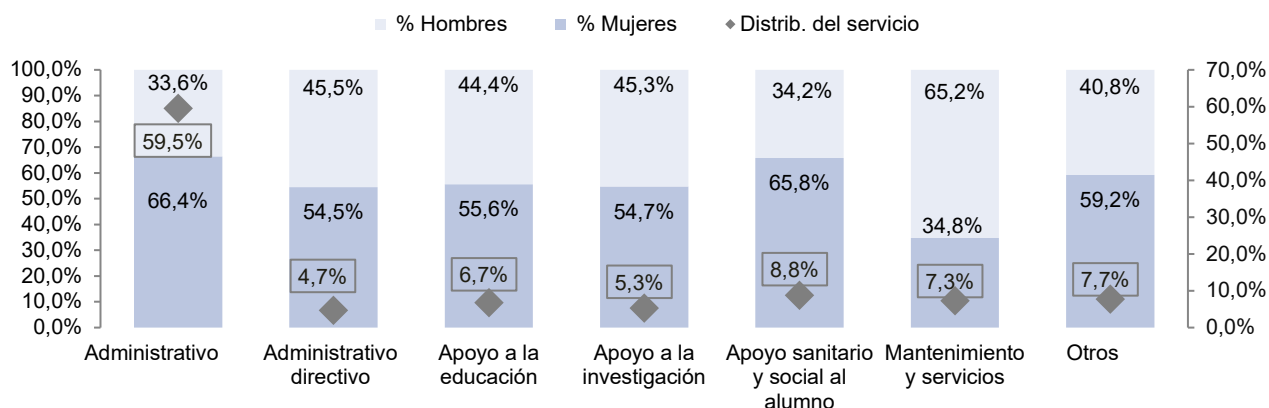

**Gráfico 10.12.2** Distribución del PAS por servicio y grupo de edad. Curso 2019-2020

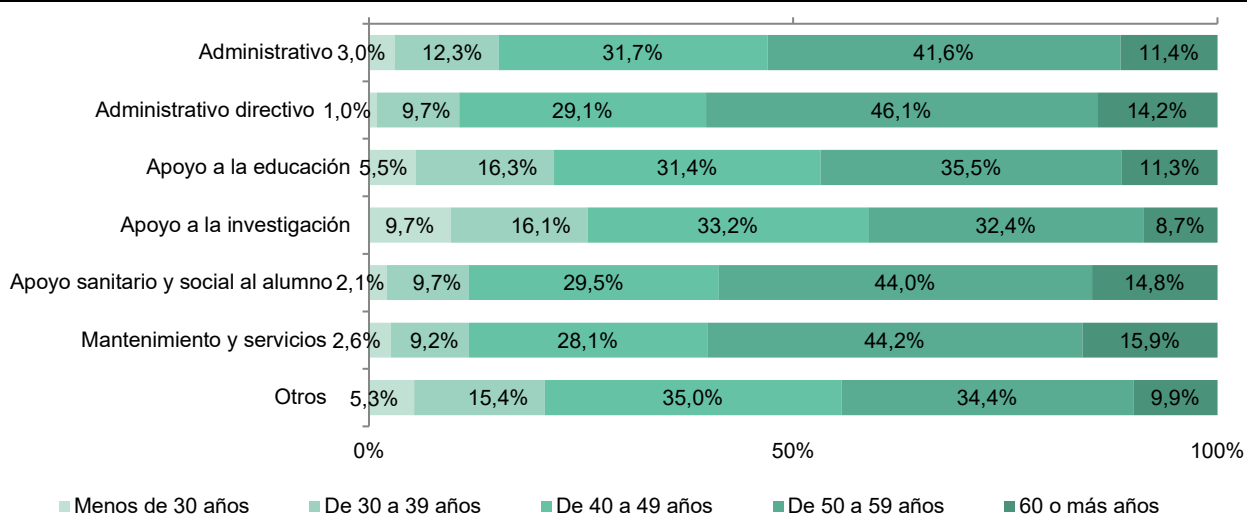

**Gráfico 10.12.3** Distribución del PAS en universidades públicas por servicio y categoría. Curso 2019-2020

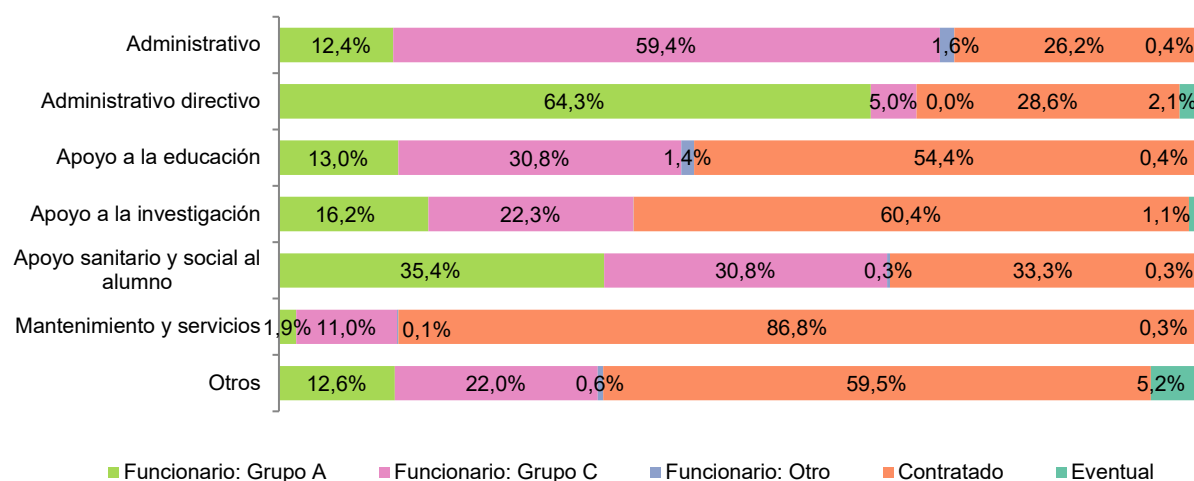

## 10.13 Personal en el SUE. PAS por número de estudiantes y de PDI

**10.13.1** Número de estudiantes por PAS (en ETC) en universidades presenciales por tipo de universidad. Curso 2019-2020

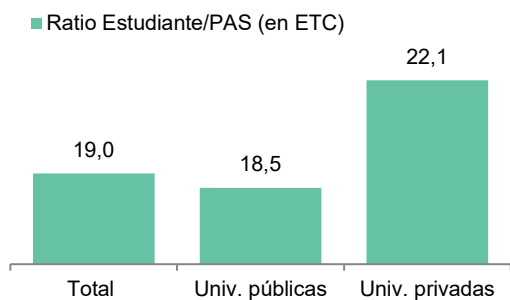

**10.13.2** Número de PDI por PAS (en ETC) en universidades presenciales por tipo de universidad. Curso 2019-2020

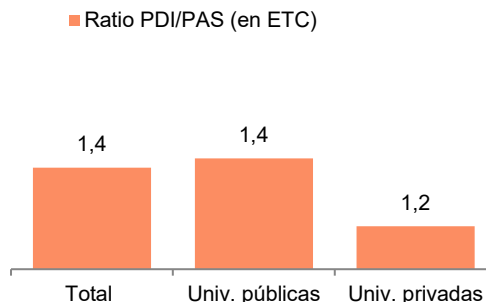

**10.13.3** Proporción y número del PDI y PAS (en ETC)<sup>(1)</sup> en universidades presenciales por tipo de universidad y sexo. Curso 2019-2020

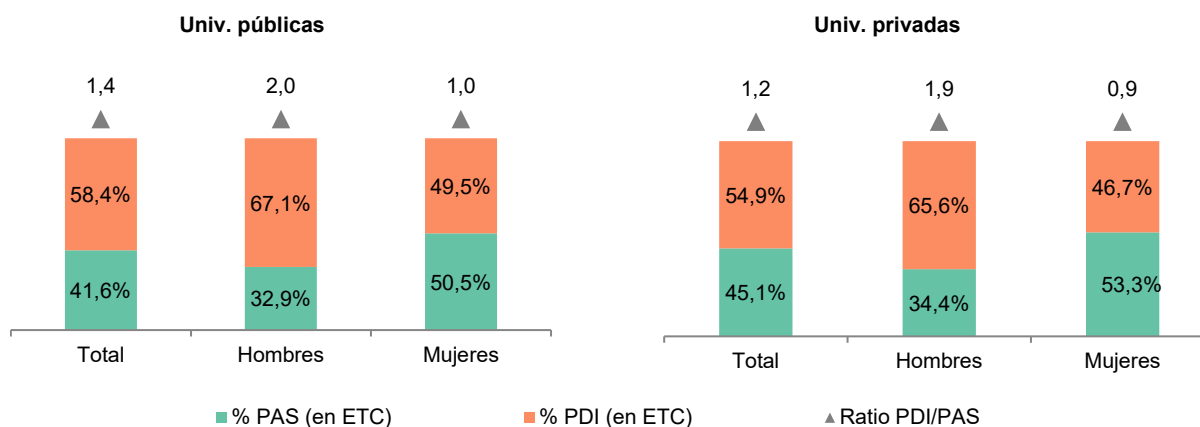

**10.13.4** Número de PDI por PAS (en ETC)<sup>(1)</sup> en universidades públicas presenciales por comunidad autónoma. Curso 2019-2020

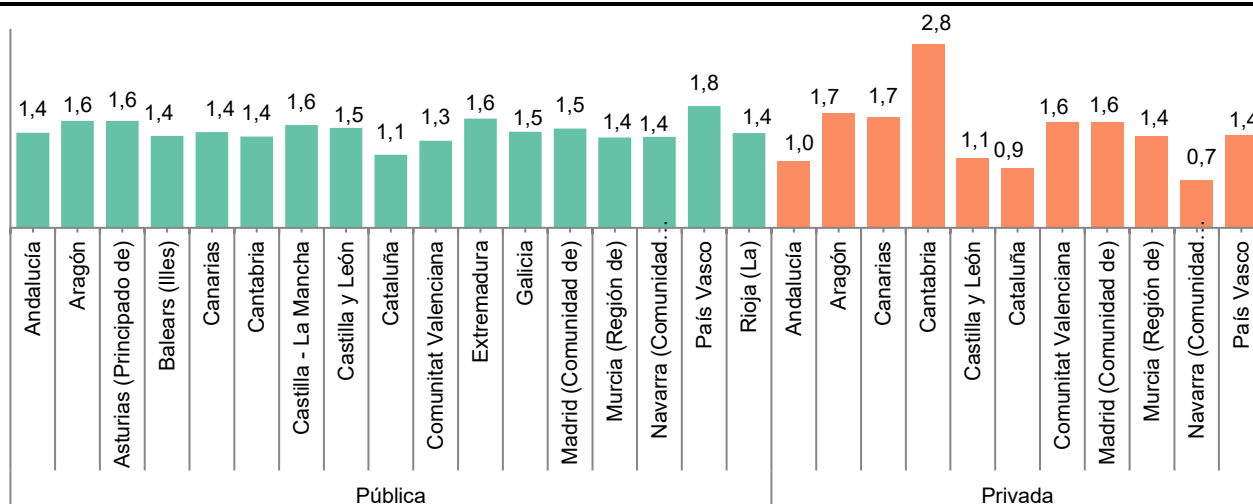

## 10.14 Personal en el SUE. Personal contratado de investigación

Tabla 10.14.1 Personal contratado de investigación. Curso 2019-2020

|                                                              | Total         |             | Univ. públicas |             | Univ. privadas |             |
|--------------------------------------------------------------|---------------|-------------|----------------|-------------|----------------|-------------|
|                                                              | Total         | % Mujeres   | Total          | % Mujeres   | Total          | % Mujeres   |
| <b>Personal contratado de investigación (PI)</b>             | <b>26.468</b> | <b>47,4</b> | <b>24.765</b>  | <b>47,1</b> | <b>1.703</b>   | <b>52,1</b> |
| <b>Personal empleado investigador<sup>(3)</sup> :</b>        | <b>19.574</b> | <b>46,5</b> | <b>18.266</b>  | <b>46,3</b> | <b>1.308</b>   | <b>49,2</b> |
| - <i>De convocatorias públicas competitivas :</i>            | <b>12.940</b> | <b>47,3</b> | <b>12.448</b>  | <b>47,0</b> | <b>492</b>     | <b>55,7</b> |
| FPI/Formación de doctores                                    | 2.886         | 45,0        | 2.776          | 44,4        | 110            | 61,8        |
| FPU                                                          | 2.529         | 48,6        | 2.488          | 48,6        | 41             | 53,7        |
| Otro predoctoral                                             | 4.884         | 50,8        | 4.616          | 50,6        | 268            | 53,7        |
| Ramón y Cajal                                                | 510           | 36,9        | 492            | 36,4        | 18             | 50,0        |
| Juan de la Cierva                                            | 323           | 48,9        | 315            | 47,9        | 8              | 87,5        |
| Otro postdoctoral                                            | 1.775         | 42,5        | 1.728          | 42,3        | 47             | 51,1        |
| Visitante                                                    | 9             | 11,1        | 9              | 11,1        |                |             |
| No especificado                                              | 24            | 45,8        | 24             | 45,8        |                |             |
| - <i>Del Art. 83, con cargo a proyectos de investigación</i> | <b>5.985</b>  | <b>45,2</b> | <b>5.670</b>   | <b>45,0</b> | <b>315</b>     | <b>48,6</b> |
| - <i>Otros investigadores empleados</i>                      | <b>649</b>    | <b>42,8</b> | <b>148</b>     | <b>41,9</b> | <b>501</b>     | <b>43,1</b> |
| <b>Personal técnico de apoyo a la investigación</b>          | <b>6.894</b>  | <b>49,9</b> | <b>6.499</b>   | <b>49,2</b> | <b>395</b>     | <b>61,8</b> |

Gráfico 10.14.2 Distribución del personal empleado investigador por tipo de universidad y organismo principal que convoca el programa o realiza la contratación. Curso 2019-2020

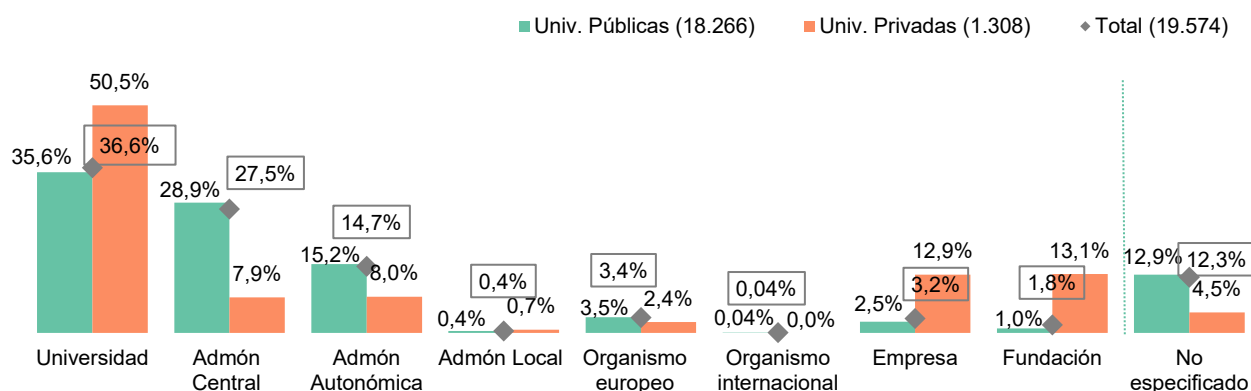

Gráfico 10.14.3 Distribución del personal empleado investigador por organismo principal que convoca el programa o realiza la contratación y sexo. Curso 2019-2020

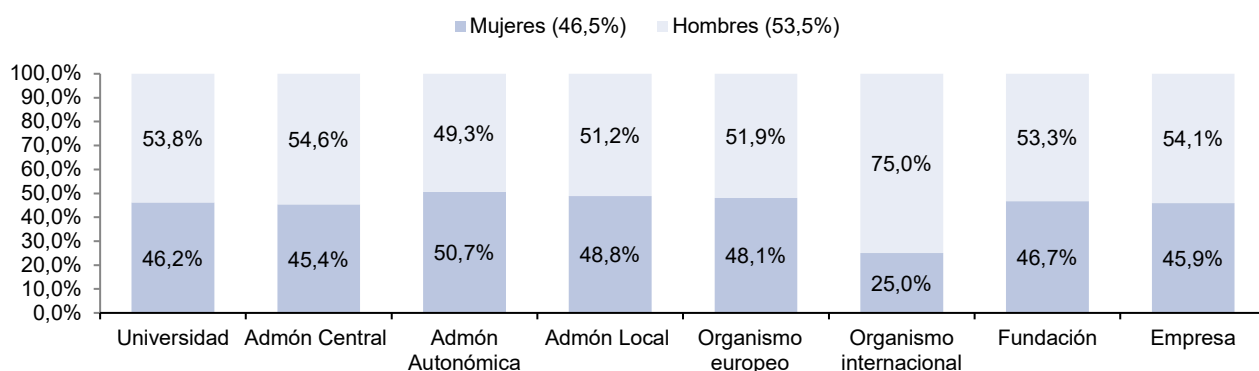

## 10.15 Personal en el SUE. Perfil del Personal Empleado Investigador

**Gráfico 10.15.1** Distribución del personal empleado investigador por categoría y sexo. Curso 2019-2020

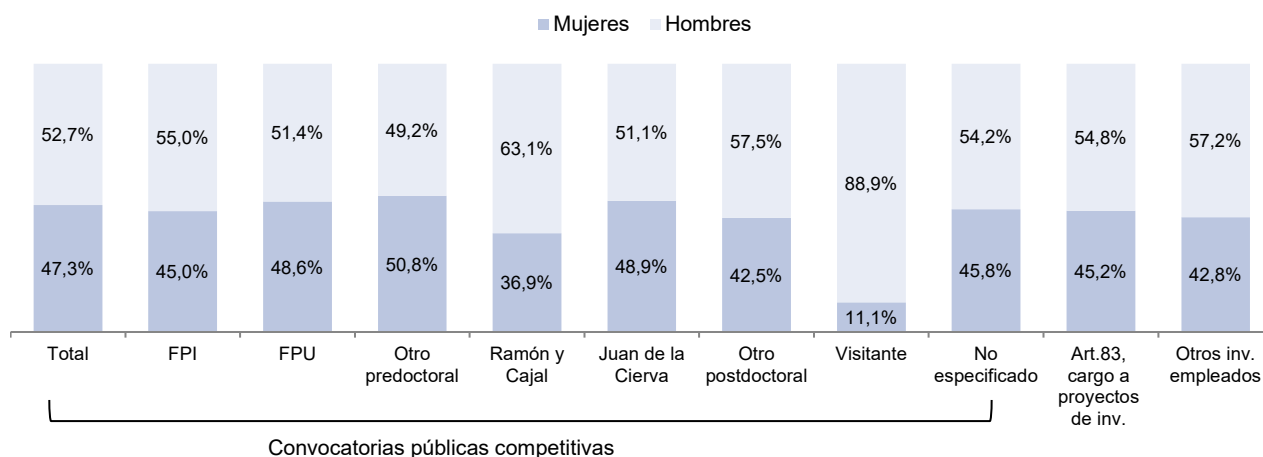

**Gráfico 10.15.2** Distribución del personal empleado investigador por categoría y grupo de edad. Curso 2019-2020

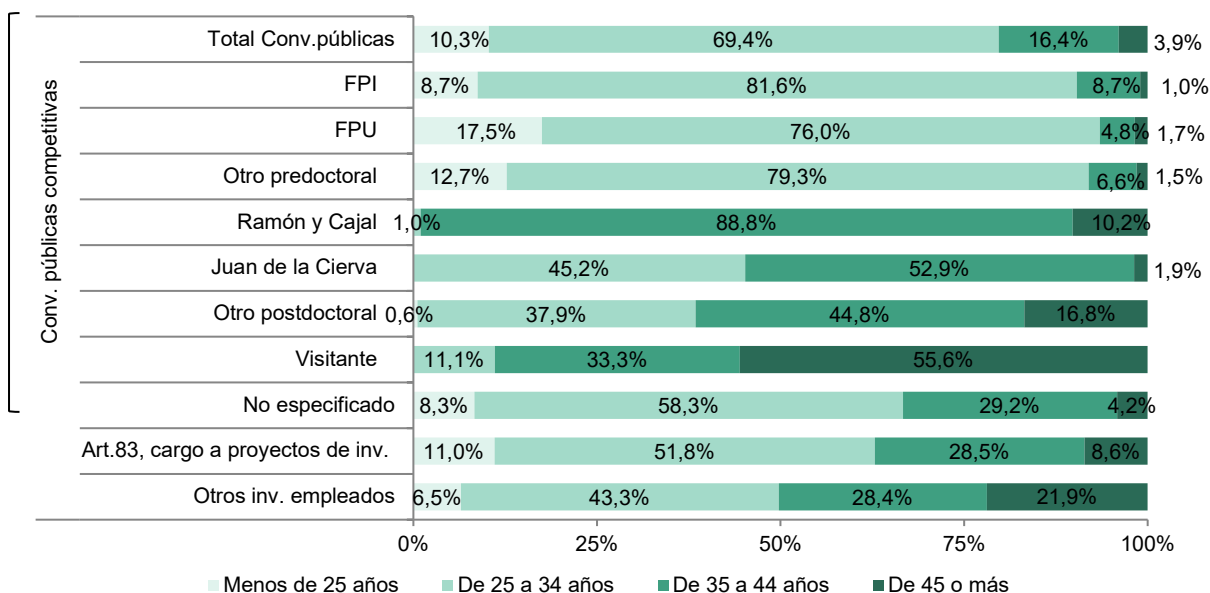

**Gráfico 10.15.3** Distribución del personal empleado investigador por sexo y grupo de edad. Curso 2019-2020

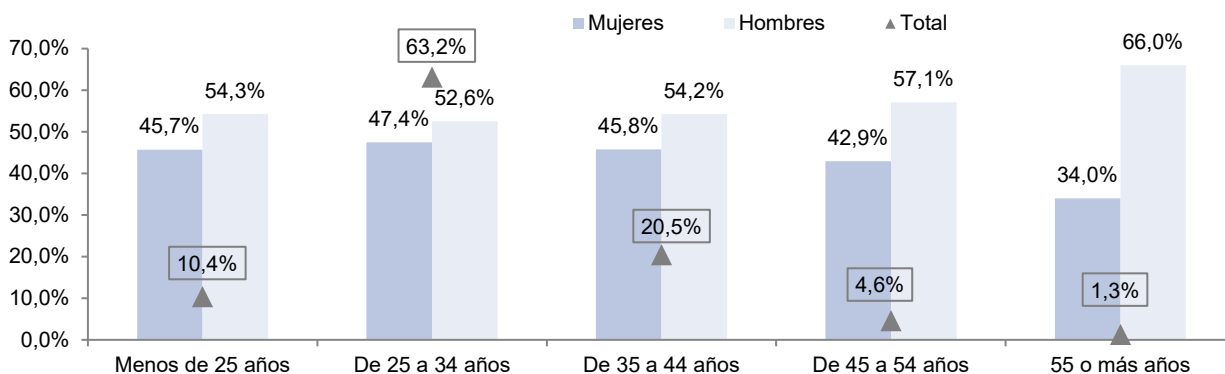

## 10.16 Personal en el SUE. Personal empleado investigador extranjero

**Gráfico 10.16.1** Personal empleado investigador extranjero por sexo. Curso 2019-2120

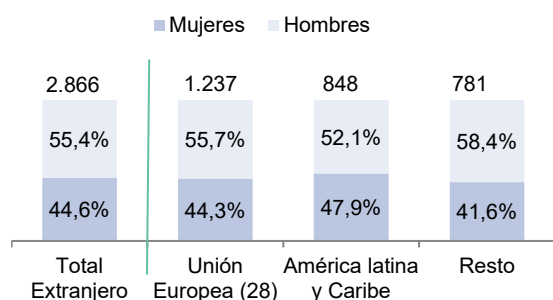

**Gráfico 10.16.2** Personal empleado investigador extranjero por grupo de edad y sexo. Curso 2019-2120

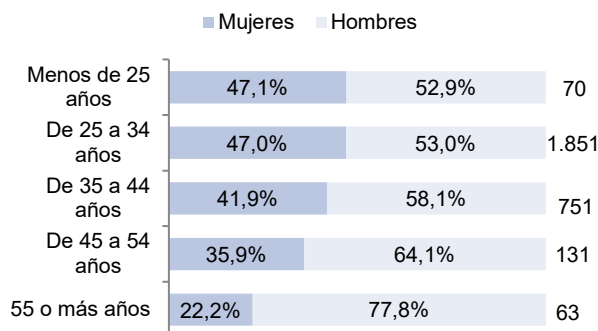

**Gráfico 10.16.3** Personal empleado investigador extranjero por grupo de edad. Curso 2019-2020

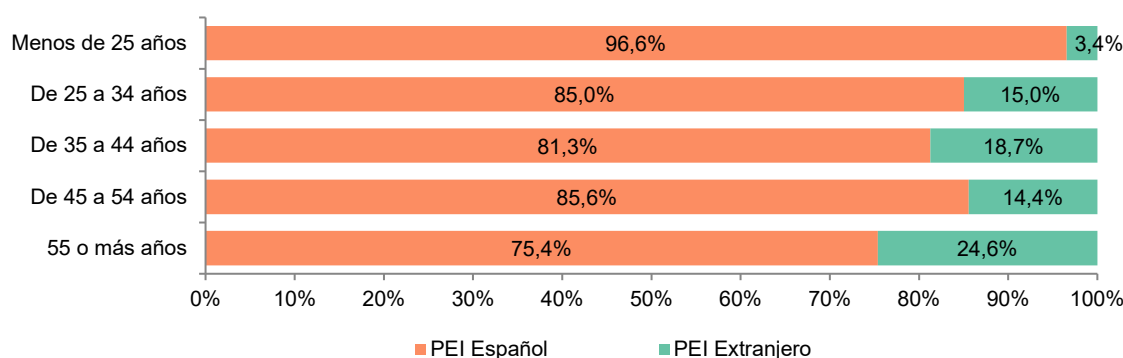

**Gráfico 10.16.4** Personal empleado investigador extranjero por tipo de universidad. Curso 2019-2120

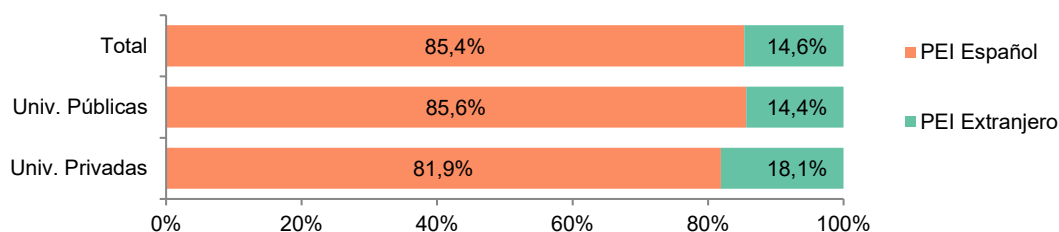

**Gráfico 10.16.5** Distribución del PDI extranjero por lugar de procedencia y tipo de universidad. Curso 2019-2020

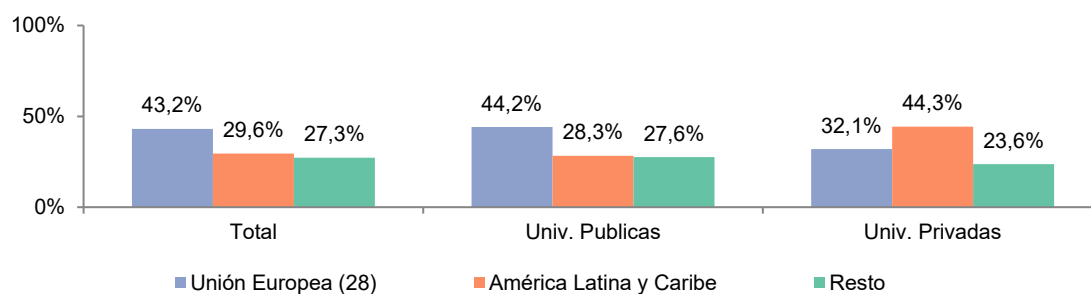

## 10.17 Personal en el SUE. Personal de Investigación

**Tabla 10.17.1** Personal de investigación. Curso 2019-2020

|                                     | Total         |               |              | Univ. públicas |               |              | Univ. privadas |               |              |
|-------------------------------------|---------------|---------------|--------------|----------------|---------------|--------------|----------------|---------------|--------------|
|                                     | Total         | Distrib. (%)  | % Mujeres    | Total          | Distrib. (%)  | % Mujeres    | Total          | Distrib. (%)  | % Mujeres    |
| <b>Total</b>                        | <b>96.535</b> | <b>100,0%</b> | <b>43,5%</b> | <b>87.124</b>  | <b>100,0%</b> | <b>43,0%</b> | <b>9.411</b>   | <b>100,0%</b> | <b>48,2%</b> |
| PDI con actividad investigadora     | 66.976        | 69,4%         | 41,5%        | 59.638         | 68,5%         | 40,9%        | 7.338          | 78,0%         | 46,4%        |
| Personal empleado investigador      | 19.574        | 20,3%         | 47,4%        | 18.266         | 21,0%         | 47,1%        | 1.308          | 13,9%         | 52,1%        |
| Técnico de apoyo a la investigación | 6.894         | 7,1%          | 49,9%        | 6.499          | 7,5%          | 49,2%        | 395            | 4,2%          | 61,8%        |
| PAS de apoyo a la investigación     | 3.091         | 3,2%          | 54,7%        | 2.721          | 3,1%          | 53,1%        | 370            | 3,9%          | 66,8%        |

**Gráfico 10.17.2** Distribución del personal de investigación por tipo de personal y grupo de edad. Curso 2019-2020

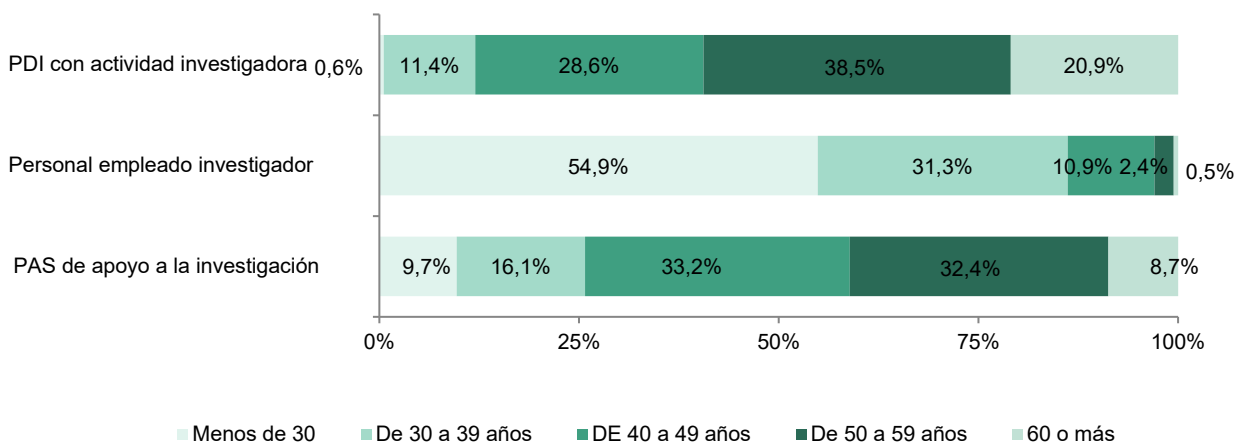

**Gráfico 10.17.3** Distribución del personal de investigación por tipo de universidad y sexo. Curso 2019-2020

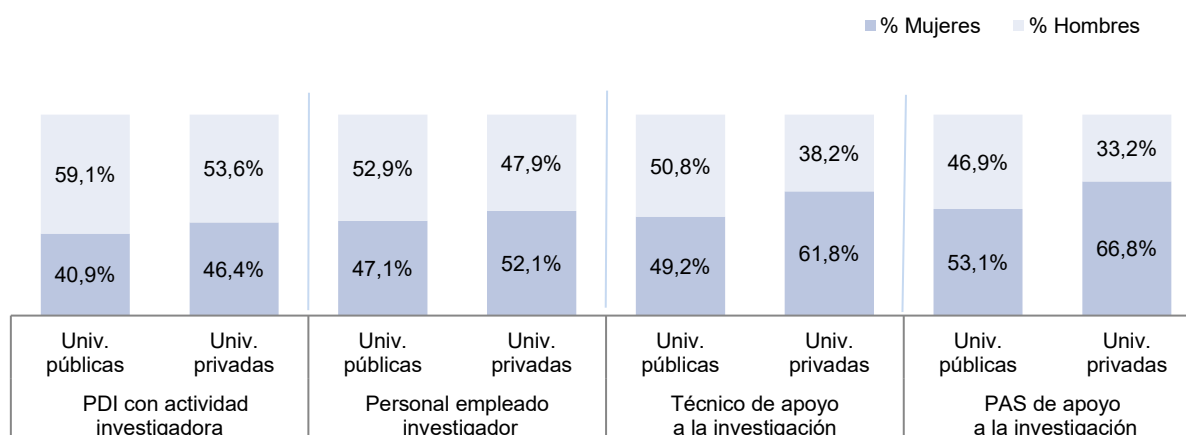





## 1. Oferta educativa universitaria

**Universidades especiales:** La Universidad Internacional Menéndez Pelayo y la Universidad Internacional de Andalucía. Estas universidades imparten únicamente titulaciones de Máster y Doctorado.

**Centros universitarios:** Se refiere a escuelas y facultades que imparten docencia oficial y que están registrados en el Registro de Universidades, Centros y Títulos.

**Centro adscrito:** Son centros que gozan de una gestión propia que puede ser pública o privada y que están ligados a una universidad. Los estudiantes de estos centros reciben el título de carácter oficial de la universidad a la que está vinculado el centro.

**Otras unidades:** Se refiere a centros universitarios que no entran dentro de la categoría de escuela o facultad tales como institutos de investigación, escuelas de doctorado, hospitales universitarios o fundaciones.

**Titulaciones interuniversitarias:** Se trata de titulaciones que corresponden a un único plan de estudios oficial diseñado por dos o más universidades, españolas o extranjeras y que es ofertado por todas ellas.

**Experimentalidad de la titulación:** Cada comunidad autónoma determina el grado de experimentalidad de cada una de las titulaciones que ofrecen sus universidades y así mismo el ministerio competente establece un precio mínimo y máximo por crédito para cada grado de experimentalidad. Este grado de experimentalidad suele estar ligado a la cantidad de prácticas y coste de las mismas.

**Máster habilitante:** Son títulos de formación superior que habilitan al estudiante a ejercer profesiones reguladas, es decir, aquellas que sólo pueden realizarse cuando se cumplen los requisitos establecidos por la ley.

**Precio medio:** El precio medio de las titulaciones impartidas es una media aritmética del precio de cada una de las titulaciones impartidas en primera matrícula por universidades públicas en centros propios y otras unidades universitarias de naturaleza pública. Este indicador ha sufrido cambios metodológicos que han implicado una reformulación de su cálculo.

[Metodología de la Estadística de Universidades, Centros y Titulaciones.](#)

[Metodología de la Estadística de Precios Públicos.](#)

## 2. Pruebas de acceso a la universidad

**Pruebas genéricas de acceso a la universidad (PAU genérica):** Son las pruebas que realizan los siguientes estudiantes:

- Titulados/tituladas en Bachillerato.
- Estudiantes de otros sistemas educativos con los que España haya suscrito Acuerdos internacionales y cumplan los requisitos exigidos en sus respectivos países para el acceso a la universidad.
- Estudiantes con el Título Superior de Formación Profesional, de Técnico Superior de Artes Plásticas y Diseño o de Técnico Deportivo Superior.
- Alumnado procedente de sistemas educativos extranjeros, con homologación del título de origen al título español de Bachiller.

**FP y Artísticas:** Acceso mediante posesión del Título Superior de Formación Profesional, de Técnico Superior de Artes Plásticas y Diseño o de Técnico Deportivo Superior o títulos equivalentes.

**Extranjeros previa solicitud de homologación:** Alumnado procedente de sistemas educativos extranjeros, previa solicitud de homologación del título de origen al título español de bachiller.

**Extranjeros con acuerdos internacionales:** Alumnado procedente de sistemas educativos miembros de la Unión Europea o de otros Estados con los que España haya suscrito Acuerdos internacionales a este respecto que cumplan los requisitos exigidos en su respectivo país para el acceso a la universidad.

**Estudiantes matriculados en las PAU:** Recuento de todas las matriculaciones realizadas por los estudiantes para participar en las pruebas de acceso a la universidad.

**Estudiantes presentados a las PAU:** Recuento de los estudiantes que habiéndose inscrito en las pruebas de acceso a la universidad finalmente las realizan.

**Estudiantes aprobados en las PAU:** Recuento de los estudiantes que habiéndose inscrito y presentado a las pruebas de acceso a la universidad la han aprobado.

[Metodología de la Estadística de Pruebas de Acceso a la Universidad.](#)

### 3. Estudiantes en el Sistema Universitario Español

**Tasa neta de escolarización en Educación Universitaria para el grupo de edad 18-24 años:** Número de estudiantes de 18-24 años en enseñanzas de Grado, 1er y 2º ciclo y Máster dividida entre la población de 18-24 años.

[Metodología de la Estadística de Estudiantes.](#)

### 4. Estudiantes de grado

**Oferta de plazas:** Número de plazas universitarias para los estudiantes de nuevo ingreso.

**Demanda:** Preinscritos en primera opción.

**Matrícula:** Matrícula de estudiantes procedentes del proceso de preinscripción.

**Porcentaje de ocupación:** Relación porcentual entre la matrícula de nuevo ingreso por preinscripción y el número de plazas ofertadas.

**Tasa de preferencia:** Relación porcentual entre la demanda y el número de plazas ofertadas.

**Tasa de adecuación:** Relación porcentual entre la matrícula de nuevo ingreso en primera opción por preinscripción y la matrícula total de nuevo ingreso por preinscripción.

**Nota de corte:** es la nota del último estudiante admitido por el cupo general, una vez realizados todos los ajustes en los procesos de admisión.

**Nota de admisión:** es la nota con la que un estudiante accede al Grado en el que se encuentra matriculado.

[Metodología de la Estadística de Estudiantes.](#)

[Metodología de la Estadística de Universidades, Centros y Titulaciones.](#)

### 5. Indicadores educativos de grado

**Tasa de rendimiento:** Relación porcentual entre número de créditos superados y número de créditos matriculados.

**Tasa de éxito:** Relación porcentual entre número de créditos superados y número de créditos presentados.

**Tasa de evaluación:** Relación porcentual entre número de créditos presentados y número de créditos matriculados.

**Tasa de abandono del estudio:**

**El 1º año:** Porcentaje de estudiantes de una cohorte de nuevo ingreso en estudios de Grado que no se encuentran matriculados en el estudio en los dos cursos siguientes.

**Global:** Es la suma de las tasa de abandono del estudio el 1º año + la tasa de abandono del estudio el 2º año + la tasa de abandono del estudio el 3º año.

**Tasa de cambio del estudio:**

**El 1º año:** Porcentaje de estudiantes de una cohorte de nuevo ingreso en estudios de Grado que se matriculan en otro estudio en los dos cursos siguientes.

**Global:** Es la suma de las tasa de cambio del estudio el 1º año + la tasa de cambio del estudio el 2º año + la tasa de cambio del estudio el 3º año.

**Tasa de idoneidad:** Porcentaje de estudiantes de nuevo ingreso en el estudio en el curso X que finalizan el estudio inicial en el curso de finalización teórico o antes.

**Tasa de graduación:** Porcentaje de estudiantes de nuevo ingreso en el estudio en el curso X que finalizan el estudio inicial en el curso de finalización teórico, antes o un año después.

**Duración media de los estudios:** Número medio de años que tardan los estudiantes en graduarse, según la duración teórica del estudio.

[Metodología de la Estadística de Rendimiento Académico.](#)

## 6. Estudiantes de máster y doctorado

**Tasa de transición de Grado a Máster:** Porcentaje de estudiantes que al finalizar un Grado y comienzan un Máster en el curso inmediatamente posterior al de la finalización del mismo.

**Tiempo medio de transición de Grado a Máster:** Número medio de cursos que transcurren entre la finalización de un Grado y el comienzo de un Máster. Este cálculo se efectúa sobre los estudiantes de nuevo ingreso en Máster que proviene de un estudio de Grado.

[Metodología de la Estadística de Estudiantes.](#)

[Metodología de la Estadística de Tesis Doctorales.](#)

[Metodología de la Estadística de Rendimiento Académico.](#)

## 7. Indicadores educativos de máster

**Tasa de rendimiento:** Relación porcentual entre número de créditos superados y número de créditos matriculados.

**Tasa de éxito:** Relación porcentual entre número de créditos superados y número de créditos presentados.

**Tasa de evaluación:** Relación porcentual entre número de créditos presentados y número de créditos matriculados.

**Tasa de abandono del estudio:**

**El 1º año:** Porcentaje de estudiantes de una cohorte de nuevo ingreso en estudios de Grado que no se encuentran matriculados en el estudio en los dos cursos siguientes.

**Global:** Es la suma de las tasa de abandono del estudio el 1º año + la tasa de abandono del estudio el 2º año + la tasa de abandono del estudio el 3º año.

**Tasa de cambio del estudio:**

**El 1º año:** Porcentaje de estudiantes de una cohorte de nuevo ingreso en estudios de Grado que se matriculan en otro estudio en los dos cursos siguientes.

**Global:** Es la suma de las tasa de cambio del estudio el 1º año + la tasa de cambio del estudio el 2º año + la tasa de cambio del estudio el 3º año.

**Tasa de idoneidad:** Porcentaje de estudiantes de nuevo ingreso en el estudio en el curso X que finalizan el estudio inicial en el curso de finalización teórico o antes.

**Tasa de graduación:** Porcentaje de estudiantes de nuevo ingreso en el estudio en el curso X que finalizan el estudio inicial en el curso de finalización teórico, antes o un año después.

**Duración media de los estudios:** Número medio de años que tardan los estudiantes en graduarse, según la duración teórica del estudio.

[Metodología de la Estadística de Rendimiento Académico.](#)

## 8. Internacionalización

**Estudiantes internacionales entrantes:** Recuento y porcentaje de los estudiantes que acceden al Sistema Universitario Español, a una universidad presencial, siendo su país de residencia habitual un país extranjero.

[Metodología de Internacionalización.](#)

## 9. Becas y ayudas al estudio

**Beca económica:** El texto se refiere a becas económicas cuando al estudiante se le adjudica una cantidad al margen del asignado en especie, como puede ser, por ejemplo, el pago de las tasas universitarias.

**Cuantía variable:** En el proceso de asignación de las becas, una vez que se han asignado las cuantías fijas, el remanente se reparte a través de una fórmula matemática que asigna una cantidad de este remanente a cada becario en función de su renta y de su rendimiento académico.

### **Tasa de pérdida de beca:**

**Tras su primer curso:** Porcentaje de estudiantes de una cohorte de nuevo ingreso en el sistema universitario, que ha sido becado el primer año y que en el curso siguiente pierden la condición de becario y siguen matriculados en el sistema universitario.

**Tras su segundo curso:** Porcentaje de estudiantes de una cohorte de nuevo ingreso en el sistema universitario, que ha sido becado el primer y el segundo año y que en el curso siguiente pierden la condición de becario y siguen matriculados en el sistema universitario.

[Metodología de la Estadística de Becas y Ayudas al Estudio en Enseñanzas Universitarias.](#)

## 10. Personal en SUE

**Personal docente e investigador (PDI):** Personal docente, siendo la investigación un derecho y un deber del mismo de acuerdo con los fines generales de la universidad y dentro de los límites establecidos por el ordenamiento jurídico.

**Cuerpo docente universitario (CDU) :** Profesorado universitario funcionario de los cuerpos de Catedráticos de Universidad (CU), Profesores Titulares de Universidad (TU), Catedráticos de Escuela Universitaria (CEU) y Profesores Titulares de Escuela Universitaria (TEU).

**Personal de administración y servicios (PAS):** Personal que desempeña funciones de gestión técnica, económica y administrativa, así como el apoyo, asesoramiento y asistencia en el desarrollo de las funciones de la universidad.

**Personal de investigación (PI):** Personal empleado investigador y personal técnico de apoyo a la investigación. El personal empleado investigador incluye al investigador de convocatorias públicas competitivas, del Art.83 de la LOMLOU, y cualquier otro investigador contratado por la universidad para el desarrollo de la actividad investigadora. El personal técnico de apoyo, es el técnico que participa en la I+D ejecutando tareas científicas y técnicas, generalmente bajo la supervisión de los investigadores.

**Personal de investigación no especificado:** Personal de investigación que no se ha diferenciado si es empleado investigador o técnico de apoyo a la investigación.

**Personal en Equivalente a Tiempo Completo (ETC):** Personal en función del número de horas de dedicación.

**Personal Permanente:** Funcionario de carrera y personal con tipo de contrato fijo o indefinido.

**Cuerpo docente universitario con sexenios óptimos:** Cuerpo docente que alcanza el número de sexenios que debería tener desde la lectura de tesis.

[Metodología de la Estadística de Personal de las Universidades.](#)



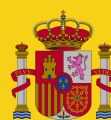

GOBIERNO  
DE ESPAÑA

MINISTERIO  
DE UNIVERSIDADES
